# Supplementary material
Source: PubMed Central journal article supplement (PMC10896643)

## Supporting Information

### Structure-Activity Relationship of Truncated 2,8-Disubstituted-adenosine Derivatives as Dual A<sub>2A</sub>/A<sub>3</sub> Adenosine Receptor Antagonists and their Cancer Immunotherapeutic Activity

Gibae Kim,<sup>1</sup> Xiyan Hou,<sup>1,2</sup> Woong Sub Byun,<sup>1,3</sup> Gyudong Kim,<sup>1,4</sup> Dnyandev B. Jarhad,<sup>1</sup> Grim Lee,<sup>1</sup> Young Eum Hyun,<sup>1</sup> Jinha Yu,<sup>1,5</sup> Chang Soo Lee,<sup>1</sup> Shuhao Qu,<sup>1</sup> Eugene Warnick,<sup>6</sup> Zhan-Guo Gao,<sup>6</sup> Ji Yong Kim,<sup>7</sup> Seunghee Ji,<sup>8</sup> Hyunwoo Shin,<sup>8</sup> Jong-Ryoul Choi,<sup>8</sup> Kenneth A. Jacobson,<sup>6</sup> Hyuk Woo Lee,<sup>7</sup> Sang Kook Lee,<sup>1</sup> Lak Shin Jeong<sup>1,7,\*</sup>

<sup>1</sup>Research Institute of Pharmaceutical Sciences, College of Pharmacy, Seoul National University, Seoul 08826, Republic of Korea, <sup>2</sup>College of Life Science, Dalian Minzu University, Dalian 116600, People's Republic of China, <sup>3</sup>Department of Chemical and Systems Biology, Chem-H and Stanford Cancer Institute, Stanford School of Medicine, Stanford University, Stanford, California 94305, United States, <sup>4</sup>College of Pharmacy & Research Institute of Drug Development, Chonnam National University, Gwangju 61186, Republic of Korea, <sup>5</sup>College of Pharmacy and Graduate School of Pharmaceutical Sciences, Ewha Womans University, Seoul 03760, South Korea, <sup>6</sup>Molecular Recognition Section, Laboratory of Bioorganic Chemistry, National Institute of Diabetes, and Digestive and Kidney Disease, National Institutes of Health, Bethesda, Maryland 20892, USA, and <sup>7</sup>Future Medicine Co., Ltd, Seoul 06665, Republic of Korea, <sup>8</sup>HK inno.N Corp., Seoul 04551, Republic of Korea.

\*Corresponding authors: lakjeong@snu.ac.k

## Table of Contents

|                                                                              |     |
|------------------------------------------------------------------------------|-----|
| Additional <i>in vitro</i> data and procedures.....                          | S3  |
| Single-Crystal X-ray crystallography data of compounds 11b, 22a and 22b..... | S5  |
| Reference.....                                                               | S11 |
| HPLC data of the representative compounds .....                              | S12 |
| <sup>1</sup> H and <sup>13</sup> C NMR of the compounds.....                 | S18 |

### Additional *in vitro* data and procedures

**Table S1.** The cAMP functional assay of A<sub>2A</sub>AR with 100 nM of full agonist CGS21680

| Compound  | % inhibition, A <sub>2A</sub> AR cAMP functional assay |
|-----------|--------------------------------------------------------|
| <b>5a</b> | 53.47%                                                 |
| <b>5d</b> | 63.82%                                                 |
| <b>5g</b> | 12.31%                                                 |

**Table S2.** The result of *in vitro* CYP inhibition assay

| Compound  | % inhibition at 10 $\mu$ M |        |         |        |        |
|-----------|----------------------------|--------|---------|--------|--------|
|           | CYP1A2                     | CYP2C9 | CYP2C19 | CYP2D6 | CYP3A4 |
| <b>5d</b> | 14%                        | 4%     | 6%      | 3%     | 0%     |

**Table S3.** The result of *in vitro* hERG inhibition assay

| Compound | % inhibition |           |            |
|----------|--------------|-----------|------------|
|          | 1 $\mu$ M    | 3 $\mu$ M | 10 $\mu$ M |
| 5d       | 13%          | 18%       | 31%        |

**Cyclic AMP Accumulation Assay with CGS-21680.** Human adenosine receptor functional experiments were carried out in A<sub>2A</sub>AR-HEK293 cell line for hA<sub>2A</sub>AR. The cells are seeded on the 96 well culture plate (NUNC 136101) with stimulation buffer (1X HBSS, Gibco 14025092; 7.5% BSA stabilizer; 250 mM IBMX, Sigma I5879; 1 M HEPES). 10  $\mu$ M of test compound and 100 nM of CGS-21680 (**26**) are added, then the cells are centrifuged at 500 rpm for 3 min, followed by incubated at 30 °C for 30 min. After incubation, the amount of cAMP is determined using LANCE Ultra cAMP detection kit (Perkin Elmer TRF0262).

***In vitro* CYP inhibition assay.** Human liver microsomes (0.25 mg/mL), 0.1 M phosphate buffer (pH 7.4), a cocktail of five coenzyme substrates (Phenacetin 50  $\mu$ M, Diclofenac 10  $\mu$ M, S-mephenytoin 100  $\mu$ M, Dextromethorphan 5  $\mu$ M, Midazolam 2.5  $\mu$ M), and test compound (10  $\mu$ M

concentration) was pre-incubated for 5 min at 37 °C. NADPH generation system solution was added and incubated for 15 min at 37 °C. In order to terminate the reaction, acetonitrile solution containing an internal standard (Terfenadine) was added and centrifuged for 5 min (14,000× g rpm, 4 °C). The supernatant was injected into the LC-MS/MS system to analyze the metabolites of the substrates simultaneously. Metabolites of each substrate produced during the reaction were analyzed using the Shimadzu Nexera XR system and TSQ vantage (Thermo). Kinetex C18 column (2.1 × 100 mm, 2.6 μm particle size; Phenomenex, USA) was used for HPLC. The mobile phase used contained 0.1% formic acid in distilled water (A) and 0.1% formic acid containing acetonitrile (B). The generated metabolites were quantified using MRM (Multiple Reaction Monitoring) and Xcalibur (version 1.6.1) was used for data analysis.<sup>1,2</sup>

***In vitro hERG assay.*** CHO cells stably expressing hERG potassium channels from Sophion Biosciences were used for this test. The cells were cultured in a humidified and air-controlled (5% CO<sub>2</sub>) incubator at 37 °C. The CHO cells which were at least two days after plating and more than 75% confluent would be used for experiments. Before testing, cells were harvested using TrypLE and resuspended in the physiological solution at the room temperature. The physiological solution and external solution were prepared at least one month. The intracellular solution was prepared in batches aliquoted, and stored at 4 °C until used. Test compounds were dissolved in 100% DMSO at 10 mM to obtain stock solutions for different test concentrations. Then the stock solutions were further diluted into external solution to achieve final concentrations for testing. Visual check for precipitation was conducted before testing. Final DMSO concentration in extracellular solution was not more than 0.30% for the test compounds. hERG SyncroPatch(384PE) assay was conducted at room temperature. The Setup, Prime Chip, Catch and Seal Cells, Amplifier Settings, Voltage and Application Protocols were established with Biomek Software (Nanion). One addition of 40 μL of the vehicle was applied, followed by 300s for a baseline period. Then the doses of the compounds were added with 40 μL. The exposure of test compound at each concentration was no less than 300s. The recording for the whole process had to pass the quality control or the well was abandoned and the compound was retested, all automatically set by PatchControl. Three concentrations (1.00 μM, 3.00 μM, and 10.00 μM) were tested for each compound. Minimum 2 replicates per concentration were obtained.

### Single-Crystal X-ray crystallography data of compounds **11b**, **22a** and **22b**.

Compound **11b**, **22a** or **22b** (~10 mg) was dissolved in ethyl acetate and dichloromethane (1.0 mL, 1:4) in a glass vial. After staying at room temperature, the single crystals of **11b**, **22a** or **22b** were obtained. X-ray diffraction data of **11b** (CCDC No: 2164196), **22a** (CCDC No: 2164194), and **22b** (CCDC No: 2258518) were obtained on a SuperNova, Dual, Cu at zero, AtlasS2 diffractometer. Using Olex2<sup>3</sup>, the structure was solved with the ShelXT<sup>4</sup> structure solution program using Intrinsic Phasing and refined with the ShelXL<sup>4</sup> refinement package using Least Squares minimization.

#### Single-Crystal X-ray crystallography of compound **11b**

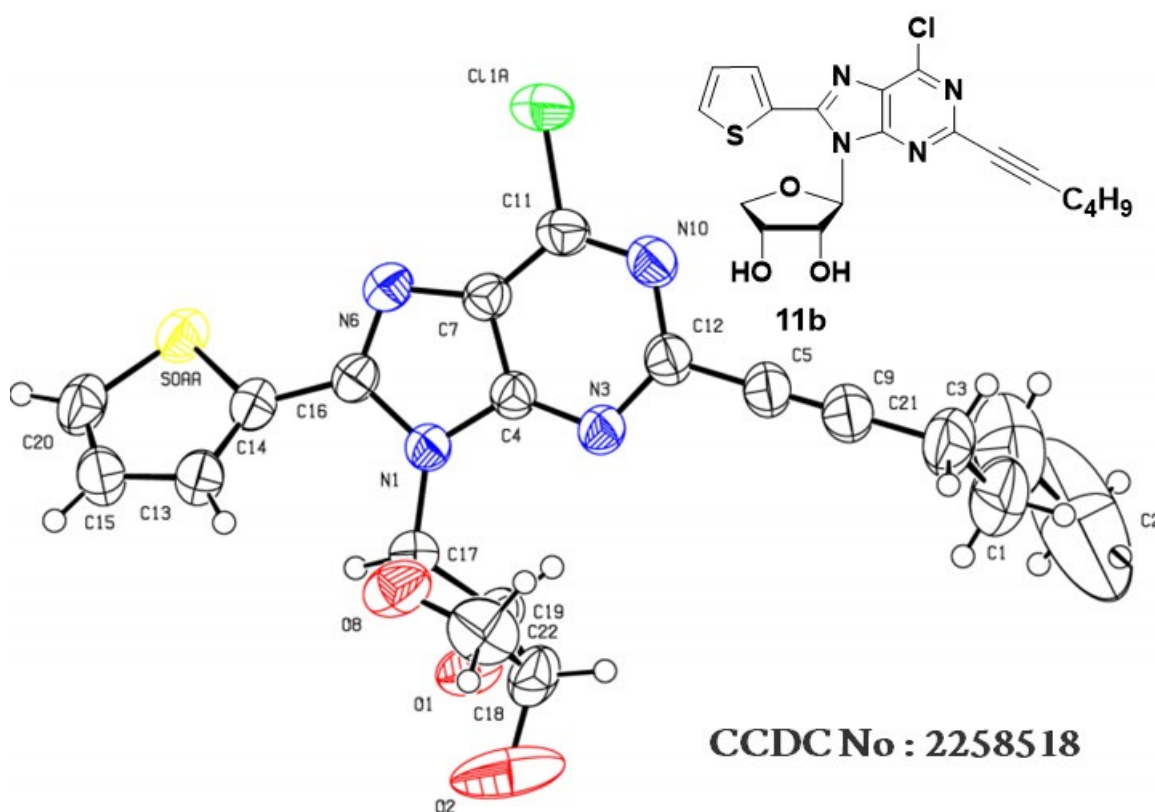

**Figure S1.** ORTEP diagram of compound **11b** showing thermal ellipsoid at 50% probability.

**Table S4.** Crystal data and structure refinement for **11b**

|                                    |                                                                   |
|------------------------------------|-------------------------------------------------------------------|
| Empirical formula                  | C <sub>19</sub> H <sub>19</sub> ClN <sub>4</sub> O <sub>3</sub> S |
| Formula weight                     | 418.89                                                            |
| Temperature/K                      | 293(1)                                                            |
| Crystal system                     | monoclinic                                                        |
| Space group                        | C2                                                                |
| a/Å                                | 25.4206(7)                                                        |
| b/Å                                | 7.3860(2)                                                         |
| c/Å                                | 10.6375(3)                                                        |
| α/°                                | 90                                                                |
| β/°                                | 96.378(2)                                                         |
| γ/°                                | 90                                                                |
| Volume/Å <sup>3</sup>              | 1984.90(10)                                                       |
| Z                                  | 4                                                                 |
| ρ <sub>calc</sub> /cm <sup>3</sup> | 1.402                                                             |
| μ/mm <sup>-1</sup>                 | 2.929                                                             |
| F(000)                             | 872.0                                                             |
| Crystal size/mm <sup>3</sup>       | 0.563 × 0.19 × 0.087                                              |
| Radiation                          | CuKα (λ = 1.54184)                                                |
| 2θ range for data collection/°     | 6.998 to 147.472                                                  |
| Index ranges                       | -31 ≤ h ≤ 26, -8 ≤ k ≤ 8, -13 ≤ l ≤ 12                            |
| Reflections collected              | 3649                                                              |
| Independent reflections            | 2927 [R <sub>int</sub> = 0.0113, R <sub>sigma</sub> = 0.0187]     |
| Data/restraints/parameters         | 2927/1/256                                                        |
| Goodness-of-fit on F <sup>2</sup>  | 1.036                                                             |



**Table S5.** Crystal data and structure refinement for **22a**

|                                    |                                                                   |
|------------------------------------|-------------------------------------------------------------------|
| Empirical formula                  | C <sub>19</sub> H <sub>19</sub> ClN <sub>4</sub> O <sub>3</sub> S |
| Formula weight                     | 418.89                                                            |
| Temperature/K                      | 293(2)                                                            |
| Crystal system                     | orthorhombic                                                      |
| Space group                        | P2 <sub>1</sub> 2 <sub>1</sub> 2 <sub>1</sub>                     |
| a/Å                                | 7.1613(18)                                                        |
| b/Å                                | 10.7229(15)                                                       |
| c/Å                                | 25.009(4)                                                         |
| α/°                                | 90                                                                |
| β/°                                | 90                                                                |
| γ/°                                | 90                                                                |
| Volume/Å <sup>3</sup>              | 1920.5(6)                                                         |
| Z                                  | 4                                                                 |
| ρ <sub>calc</sub> /cm <sup>3</sup> | 1.449                                                             |
| μ/mm <sup>-1</sup>                 | 0.337                                                             |
| F(000)                             | 872.0                                                             |
| Crystal size/mm <sup>3</sup>       | 0.262 × 0.114 × 0.075                                             |
| Radiation                          | MoKα (λ = 0.71073)                                                |
| 2θ range for data collection/°     | 5.004 to 58.788                                                   |
| Index ranges                       | -8 ≤ h ≤ 8, -13 ≤ k ≤ 14, -25 ≤ l ≤ 34                            |
| Reflections collected              | 11286                                                             |
| Independent reflections            | 4489 [R <sub>int</sub> = 0.0733, R <sub>sigma</sub> = 0.1095]     |





**Table S6.** Crystal data and structure refinement for **22b**

|                                    |                                                                                |
|------------------------------------|--------------------------------------------------------------------------------|
| Empirical formula                  | C <sub>19</sub> H <sub>19</sub> ClN <sub>4</sub> O <sub>2</sub> S <sub>2</sub> |
| Formula weight                     | 434.97                                                                         |
| Temperature/K                      | 111.0(8)                                                                       |
| Crystal system                     | orthorhombic                                                                   |
| Space group                        | P2 <sub>1</sub> 2 <sub>1</sub> 2 <sub>1</sub>                                  |
| a/Å                                | 7.0735(7)                                                                      |
| b/Å                                | 24.677(4)                                                                      |
| c/Å                                | 12.1455(13)                                                                    |
| α/°                                | 90                                                                             |
| β/°                                | 90                                                                             |
| γ/°                                | 90                                                                             |
| Volume/Å <sup>3</sup>              | 2120.0(4)                                                                      |
| Z                                  | 4                                                                              |
| ρ <sub>calc</sub> /cm <sup>3</sup> | 1.3627                                                                         |
| μ/mm <sup>-1</sup>                 | 0.399                                                                          |
| F(000)                             | 905.9                                                                          |
| Crystal size/mm <sup>3</sup>       | 0.466 × 0.394 × 0.229                                                          |
| Radiation                          | Mo Kα (λ = 0.71073)                                                            |
| 2θ range for data collection/°     | 4.7 to 59.38                                                                   |
| Index ranges                       | -8 ≤ h ≤ 9, -34 ≤ k ≤ 29, -15 ≤ l ≤ 16                                         |

|                                                |                                                                  |
|------------------------------------------------|------------------------------------------------------------------|
| Reflections collected                          | 23486                                                            |
| Independent reflections                        | 5357 [ $R_{\text{int}} = 0.0955$ , $R_{\text{sigma}} = 0.0926$ ] |
| Data/restraints/parameters                     | 5357/12/255                                                      |
| Goodness-of-fit on $F^2$                       | 1.038                                                            |
| Final R indexes [ $I > 2\sigma(I)$ ]           | $R_1 = 0.0902$ , $wR_2 = 0.2143$                                 |
| Final R indexes [all data]                     | $R_1 = 0.1161$ , $wR_2 = 0.2353$                                 |
| Largest diff. peak/hole / $e \text{ \AA}^{-3}$ | 1.00/-0.90                                                       |

## Reference

- (1) Kim, M.-J.; Kim, H.; Cha, I.-J.; Park, J.-S.; Shon, J.-H.; Liu, K.-H.; Shin, J.-G. High-throughput screening of inhibitory potential of nine cytochrome P450 enzymes *in vitro* using liquid chromatography/tandem mass spectrometry. *Rapid Commun. Mass Spectrom.* **2005**, *19*, 2651–2658.
- (2) Kerns, E.H.; Di, L. (Eds.) *Chapter 32—CYP Inhibition Methods. Drug-like Properties: Concepts, Structure Design and Methods*, Academic Press: San Diego, CA, USA, 2008, pp. 360–3
- (3) Dolomanov, O. V.; Bourhis, L. J.; Gildea, R. J.; Howard, J. A. K.; Puschmann, H. J. *Appl. Cryst.* **2009**, *42*, 339-341..
- (4) Sheldrick, G. M. *Acta Cryst.* **2015**, *A71*, 3-8.
- (5) Sheldrick, G. M. *Acta Cryst.* **2015**, *C71*, 3-8.

**HPLC data of the representative compounds**

*HPLC data of the compound **5d***

Data File D:\Data\9171\9171\_220314\_KGB 2022-03-14 11-31-57\LJ4517.D  
Sample Name: LJ4517

```
=====
Acq. Operator   : SYSTEM                      Seq. Line :    4
Acq. Instrument : 1290 Infinity                Location  : P1-A-01
Injection Date  : 3/14/2022 1:05:50 PM        Inj       :    1
                                           Inj Volume: 10.000 µl
Method          : D:\Data\9171\9171_220314_KGB 2022-03-14 11-31-57\210809_KGB.M (Sequence
Method)
Last changed    : 3/14/2022 11:31:57 AM by SYSTEM
=====
```

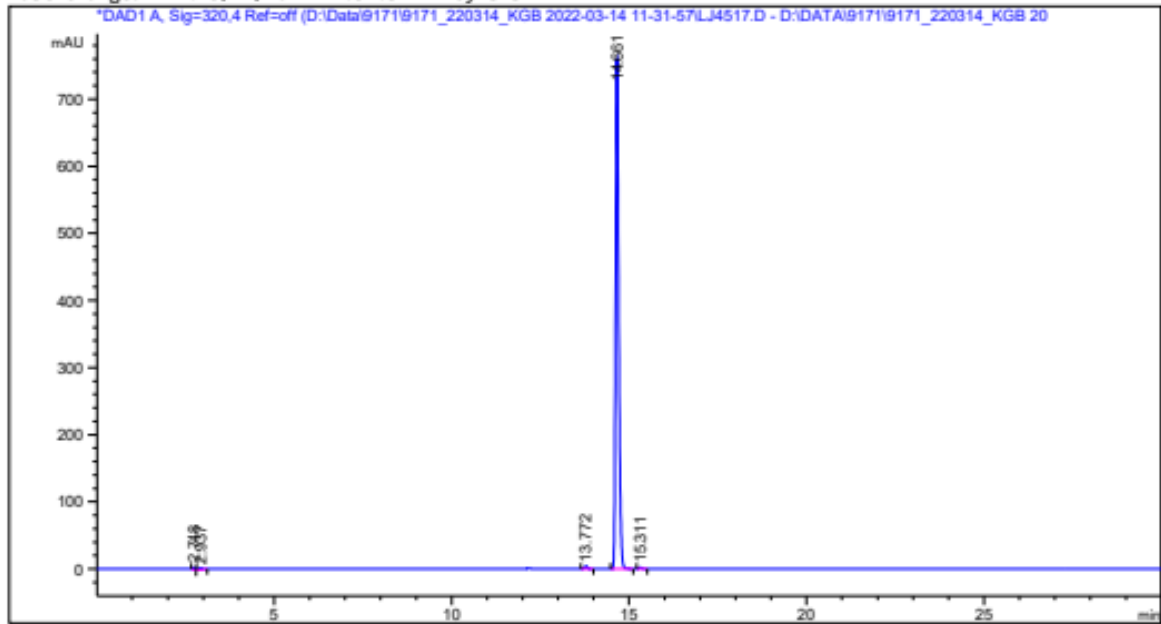

=====  
Area Percent Report  
=====

Sorted By : Signal  
Multiplier : 1.0000  
Dilution : 1.0000  
Do not use Multiplier & Dilution Factor with ISTDs

Signal 1: DAD1 A, Sig=320,4 Ref=off  
Signal has been modified after loading from rawdata file!

| Peak # | RetTime [min] | Type | Width [min] | Area [mAU*s] | Height [mAU] | Area %  |
|--------|---------------|------|-------------|--------------|--------------|---------|
| 1      | 2.748         | BB   | 0.0527      | 10.08669     | 3.04008      | 0.2170  |
| 2      | 2.937         | BB   | 0.1353      | 15.64708     | 1.53052      | 0.3366  |
| 3      | 13.772        | BB   | 0.0918      | 22.83916     | 3.81585      | 0.4913  |
| 4      | 14.661        | BB   | 0.0903      | 4589.68164   | 761.54034    | 98.7254 |
| 5      | 15.311        | BB   | 0.0935      | 10.68061     | 1.74166      | 0.2297  |

Totals :                    4648.93519   771.66846

HPLC data of the compound **5g**

Data File D:\Data\9171\9171-190308\_kim 2019-03-08 14-28-43\KGB-II-76(1).D  
Sample Name: KGB-II-76(1)

```
=====
Acq. Operator   : SYSTEM                      Seq. Line :    9
Acq. Instrument : 1290 Infinity                Location  : P1-A-03
Injection Date  : 3/8/2019 6:36:49 PM         Inj       :    1
                                                Inj Volume: 10.000 µl
Acq. Method     : D:\Data\9171\9171-190308_kim 2019-03-08 14-28-43\190308_kim.M
Last changed    : 3/8/2019 3:14:53 PM by SYSTEM
Analysis Method : D:\Data\9171\9171-190308_kim 2019-03-08 14-28-43\190308_kim.M (Sequence
Method)
Last changed    : 3/8/2019 3:30:48 PM by SYSTEM
=====
```

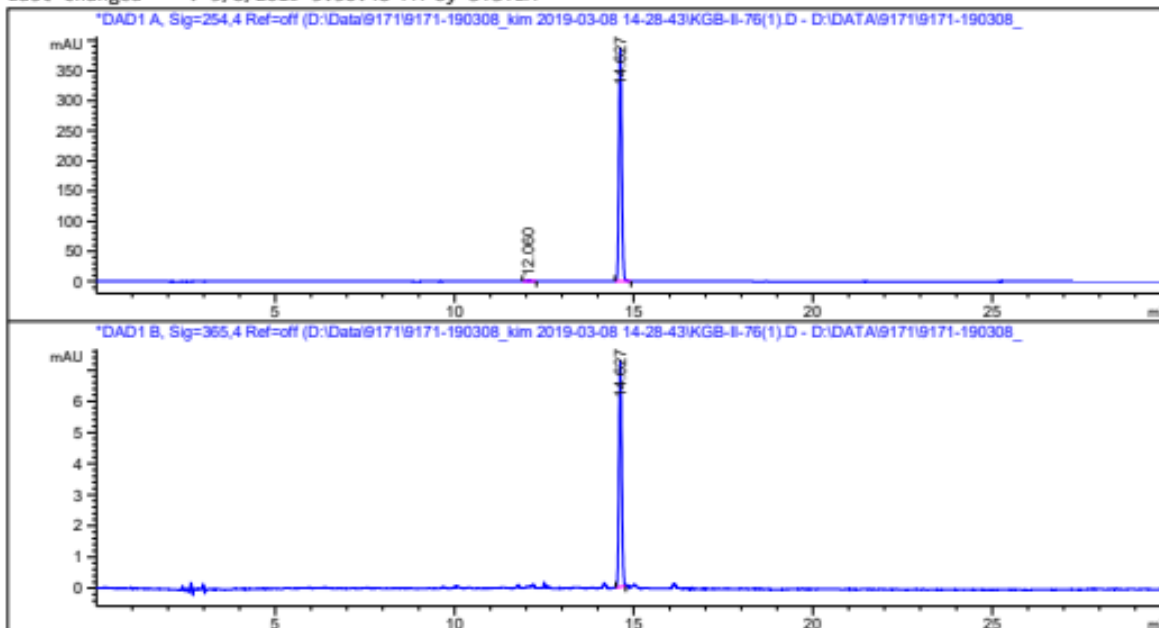

```
=====
                          Area Percent Report
=====
```

```
Sorted By      :      Signal
Multiplier     :      1.0000
Dilution       :      1.0000
Use Multiplier & Dilution Factor with ISTDs
```

Signal 1: DAD1 A, Sig=254,4 Ref=off  
Signal has been modified after loading from rawdata file!

| Peak # | RetTime [min] | Type | Width [min] | Area [mAU*s] | Height [mAU] | Area %  |
|--------|---------------|------|-------------|--------------|--------------|---------|
| 1      | 12.060        | BB   | 0.0941      | 10.40172     | 1.63749      | 0.5011  |
| 2      | 14.627        | BB   | 0.0821      | 2065.25195   | 387.94006    | 99.4989 |

Totals :                                    2075.65367    389.57755

HPLC data of the compound **5h**

Data File D:\Data\9171\9171-190308\_kim 2019-03-08 14-28-43\KGB-II-74.D  
 Sample Name: KGB-II-74

```

=====
Acq. Operator   : SYSTEM                      Seq. Line :    7
Acq. Instrument : 1290 Infinity                Location  : P1-A-01
Injection Date  : 3/8/2019 5:35:04 PM         Inj       :    1
                                           Inj Volume: 10.000 µl
Sequence File   : D:\Data\9171\9171-190308_kim 2019-03-08 14-28-43\9171-190308_kim.S
Method          : D:\Data\9171\9171-190308_kim 2019-03-08 14-28-43\190308_kim.M (Sequence
                  Method)
Last changed    : 3/8/2019 3:14:53 PM by SYSTEM
  
```

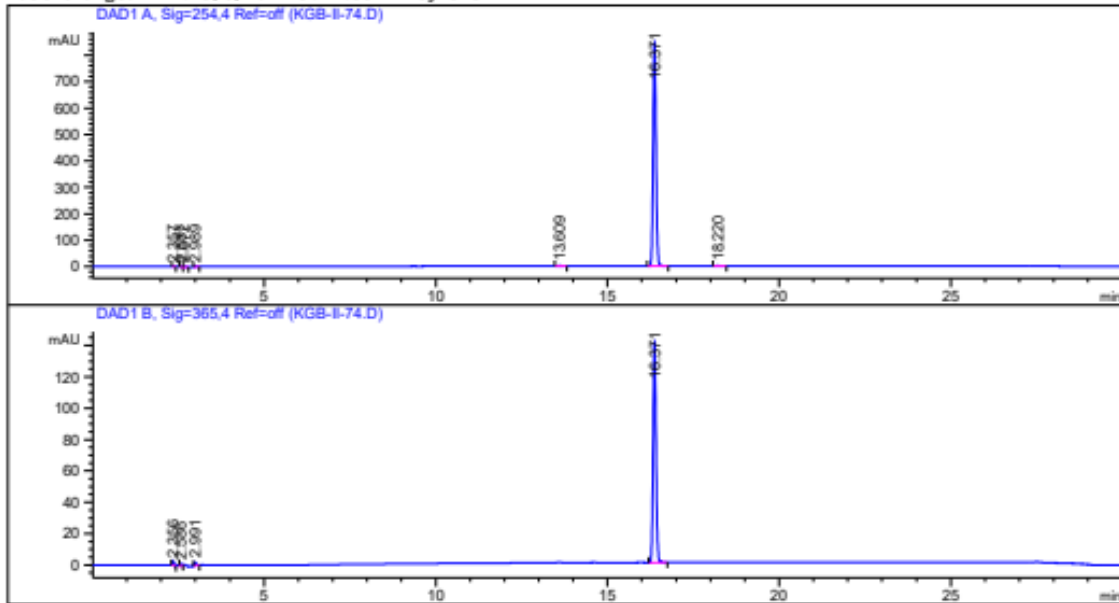

Area Percent Report

```

Sorted By      : Signal
Multiplier     : 1.0000
Dilution       : 1.0000
Use Multiplier & Dilution Factor with ISTDs
  
```

Signal 1: DAD1 A, Sig=254,4 Ref=off

| Peak # | RetTime [min] | Type | Width [min] | Area [mAU*s] | Height [mAU] | Area %  |
|--------|---------------|------|-------------|--------------|--------------|---------|
| 1      | 2.357         | BB   | 0.0506      | 9.57488      | 2.89289      | 0.1960  |
| 2      | 2.587         | VV   | 0.0674      | 5.21559      | 1.13854      | 0.1067  |
| 3      | 2.672         | VB   | 0.0747      | 5.29344      | 1.05193      | 0.1083  |
| 4      | 2.989         | BB   | 0.0503      | 10.31255     | 3.13893      | 0.2111  |
| 5      | 13.609        | BB   | 0.0929      | 10.03435     | 1.56261      | 0.2054  |
| 6      | 16.371        | BB   | 0.0867      | 4836.85352   | 845.49213    | 98.9963 |
| 7      | 18.220        | BB   | 0.0974      | 8.60644      | 1.33185      | 0.1761  |

Totals : 4885.89077 856.60887

1290 Infinity 3/8/2019 6:05:08 PM SYSTEM

Data File D:\Data\9171\9171-190308\_kim 2019-03-08 14-28-43\KGB-II-75.D  
 Sample Name: KGB-II-75

```

=====
Acq. Operator   : SYSTEM                      Seq. Line :    8
Acq. Instrument : 1290 Infinity                Location  : P1-A-02
Injection Date  : 3/8/2019 6:05:56 PM        Inj       :    1
                                           Inj Volume: 10.000 µl

Acq. Method    : D:\Data\9171\9171-190308_kim 2019-03-08 14-28-43\190308_kim.M
Last changed   : 3/8/2019 3:14:53 PM by SYSTEM
Analysis Method: D:\Data\9171\9171-190308_kim 2019-03-08 14-28-43\190308_kim.M (Sequence
Method)
Last changed   : 3/8/2019 3:30:48 PM by SYSTEM
  
```

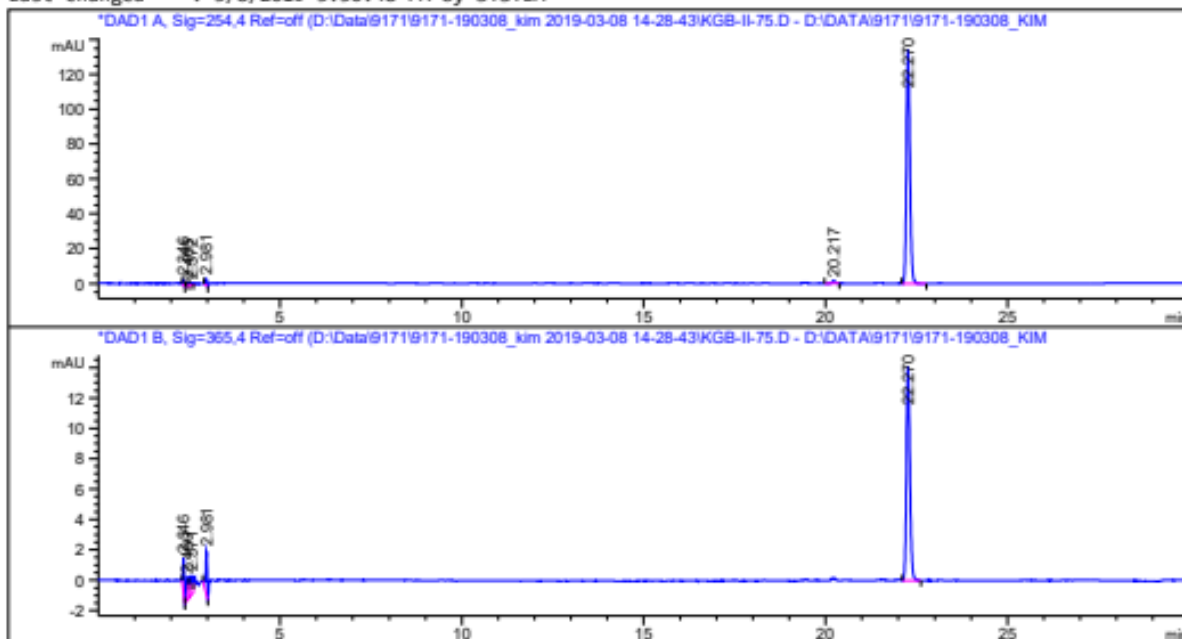

Area Percent Report

```

=====
Sorted By      : Signal
Multiplier     : 1.0000
Dilution      : 1.0000
Use Multiplier & Dilution Factor with ISTDs
  
```

Signal 1: DAD1 A, Sig=254,4 Ref=off  
 Signal has been modified after loading from rawdata file!

| Peak # | RetTime [min] | Type | Width [min] | Area [mAU*s] | Height [mAU] | Area %  |
|--------|---------------|------|-------------|--------------|--------------|---------|
| 1      | 2.346         | BB   | 0.0398      | 6.28328      | 2.64020      | 0.6640  |
| 2      | 2.463         | BV   | 0.0003      | 7.73419      | 1.60179      | 0.8173  |
| 3      | 2.572         | VV   | 0.0785      | 7.98579      | 1.35988      | 0.8439  |
| 4      | 2.981         | BB   | 0.0444      | 10.16790     | 3.66342      | 1.0745  |
| 5      | 20.217        | BB   | 0.0996      | 8.04234      | 1.24146      | 0.8499  |
| 6      | 22.270        | BB   | 0.1046      | 906.08051    | 134.56239    | 95.7504 |

HPLC data of the compound *Sj*



Data File D:\Data\9171\9171-190308\_kim 2019-03-08 14-28-43\KGB-II-81.D  
Sample Name: KGB-II-81

```
=====
Acq. Operator   : SYSTEM                      Seq. Line : 12
Acq. Instrument : 1290 Infinity                Location  : P1-A-06
Injection Date  : 3/8/2019 8:09:26 PM         Inj       : 1
                                           Inj Volume: 10.000 µl
Acq. Method    : D:\Data\9171\9171-190308_kim 2019-03-08 14-28-43\190308_kim.M
Last changed   : 3/8/2019 3:14:53 PM by SYSTEM
Analysis Method: D:\Data\9171\9171-190308_kim 2019-03-08 14-28-43\190308_kim.M (Sequence
Method)
Last changed   : 3/8/2019 3:30:48 PM by SYSTEM
=====
```

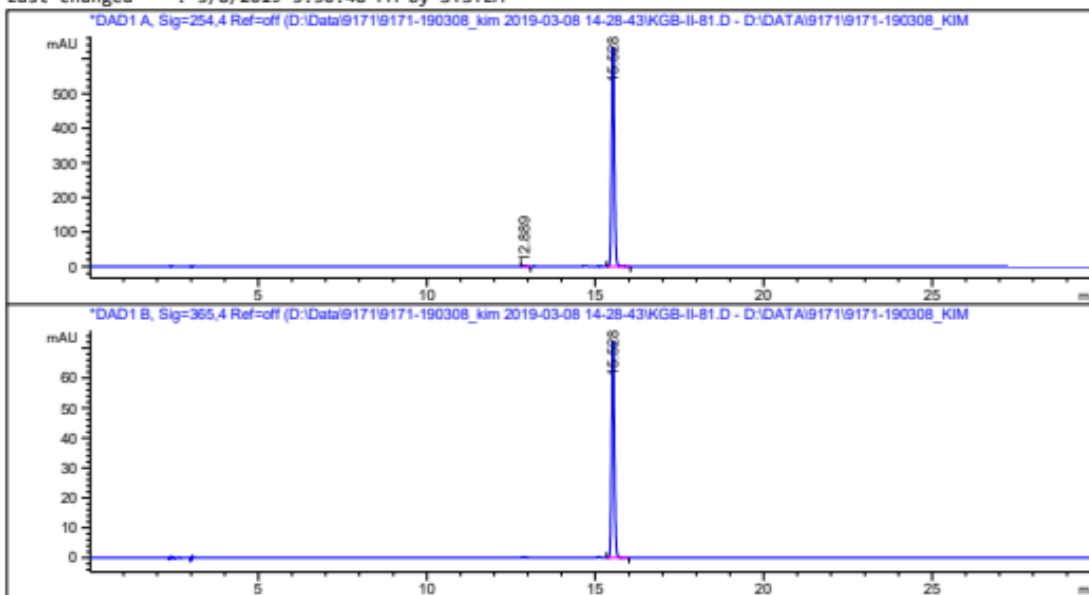

=====  
Area Percent Report  
=====

```
Sorted By      : Signal
Multiplier     : 1.0000
Dilution       : 1.0000
Use Multiplier & Dilution Factor with ISTDs
```

Signal 1: DAD1 A, Sig=254,4 Ref-off  
Signal has been modified after loading from rawdata file!

| Peak # | RetTime [min] | Type | Width [min] | Area [mAU*s] | Height [mAU] | Area %  |
|--------|---------------|------|-------------|--------------|--------------|---------|
| 1      | 12.889        | BB   | 0.0828      | 15.31868     | 2.84445      | 0.4422  |
| 2      | 15.528        | BB   | 0.0833      | 3449.07275   | 635.58429    | 99.5578 |

Totals :                   3464.39143   638.42874

HPLC data of the compound **5k**

Data File D:\Data\9171\9171-190308\_kim 2019-03-08 14-28-43\KGB-II-79.D  
 Sample Name: KGB-II-79

```

=====
Acq. Operator   : SYSTEM                      Seq. Line :   11
Acq. Instrument : 1290 Infinity                Location  : P1-A-05
Injection Date  : 3/8/2019 7:38:34 PM         Inj       :    1
                                           Inj Volume: 10.000 µl

Sequence File   : D:\Data\9171\9171-190308_kim 2019-03-08 14-28-43\9171-190308_kim.S
Method          : D:\Data\9171\9171-190308_kim 2019-03-08 14-28-43\190308_kim.M (Sequence
                  Method)
Last changed    : 3/8/2019 3:14:53 PM by SYSTEM
  
```

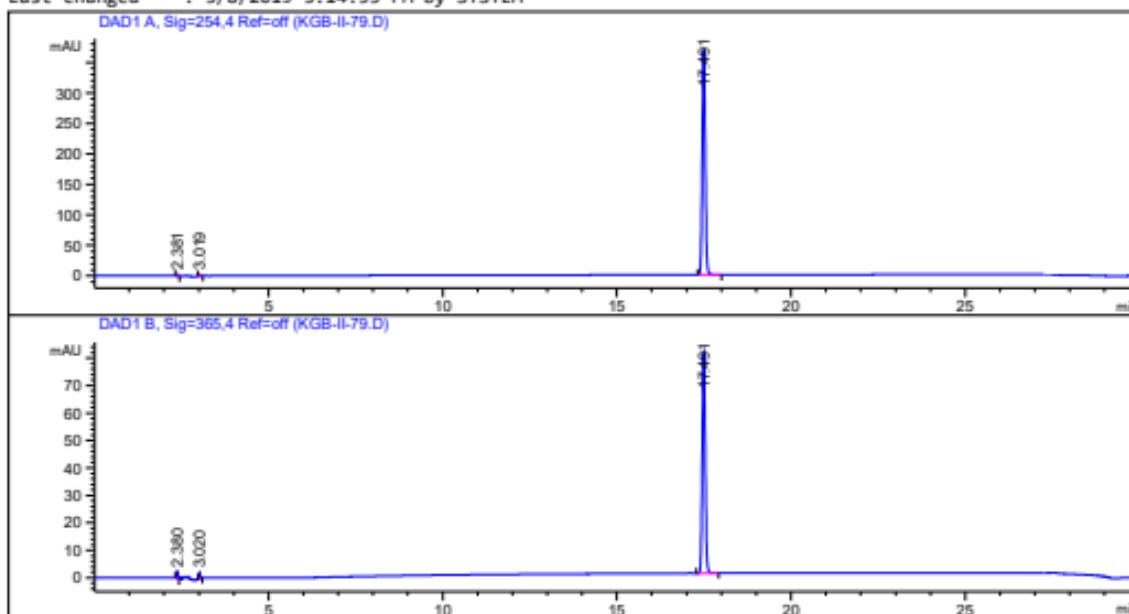

=====  
 Area Percent Report  
 =====

```

Sorted By      : Signal
Multiplier     : 1.0000
Dilution       : 1.0000
Use Multiplier & Dilution Factor with ISTDs
  
```

Signal 1: DAD1 A, Sig=254,4 Ref=off

| Peak # | RetTime [min] | Type | Width [min] | Area [mAU*s] | Height [mAU] | Area %  |
|--------|---------------|------|-------------|--------------|--------------|---------|
| 1      | 2.381         | BB   | 0.0486      | 9.12424      | 3.07989      | 0.4171  |
| 2      | 3.019         | BB   | 0.0474      | 9.00926      | 2.97110      | 0.4118  |
| 3      | 17.491        | BB   | 0.0906      | 2169.41211   | 368.91376    | 99.1711 |

Totals :                            2187.54562 374.96475

KGB-2-89\_400MHz\_MeOD\_20190218\_Proton-1-2.jdf

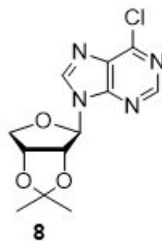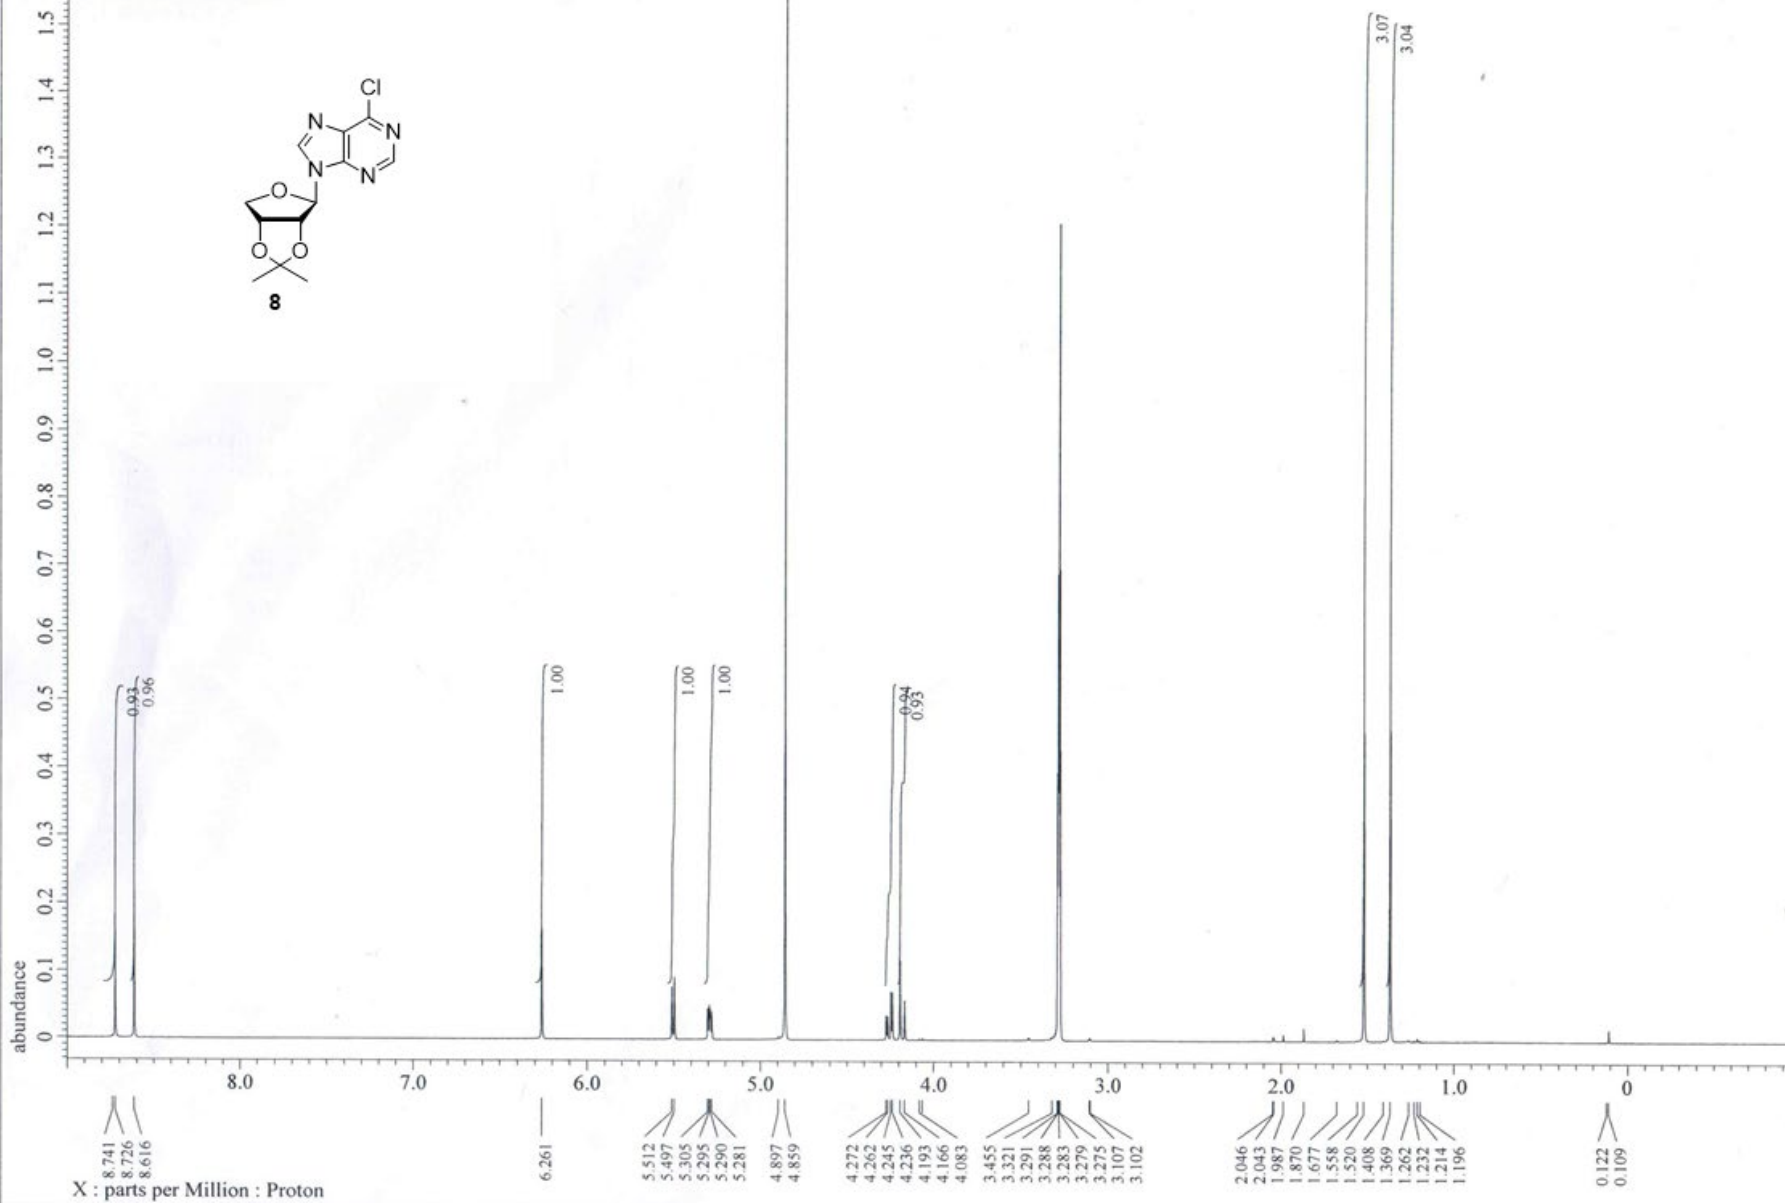

HXY-4-77-1

exp5 std13c

| SAMPLE      |             | DEC. & VT  |          |
|-------------|-------------|------------|----------|
| date        | Mar 22 2011 | dfrq       | 400.046  |
| solvent     | CDC13       | dn         | H1       |
| file        | exp         | dpwr       | 41       |
| ACQUISITION |             | dof        | 1043.9   |
| sfrq        | 100.601     | dm         | YYY      |
| tn          | C13         | dmm        | w        |
| at          | 0.916       | daf        | 10900    |
| np          | 46076       | dseq       |          |
| sw          | 25157.2     | dres       | 1.0      |
| fb          | not used    | homo       | n        |
| bs          | 4           | temp       | 25.0     |
| tpwr        | 55          | PROCESSING |          |
| pw          | 10.1        | lb         | 2.00     |
| d1          | 2.000       | wtfile     |          |
| tof         | 1043.3      | proc       | ft       |
| nt          | 1500        | fn         | not used |
| ct          | 240         | math       | f        |
| alock       | n           |            |          |
| gain        | not used    | werr       |          |
| FLAGS       |             | wexp       |          |
| il          | n           | wbs        |          |
| in          | n           | wnt        |          |
| dp          | y           |            |          |
| hs          | nn          |            |          |
| DISPLAY     |             |            |          |
| sp          | -1091.8     |            |          |
| wp          | 19238.7     |            |          |
| vs          | 264         |            |          |
| sc          | 0           |            |          |
| wc          | 250         |            |          |
| hzmm        | 76.95       |            |          |
| is          | 41.78       |            |          |
| rfl         | 9786.4      |            |          |
| rfp         | 7768.6      |            |          |
| th          | 12          |            |          |
| ins         | 1.000       |            |          |
| al          | ph          |            |          |

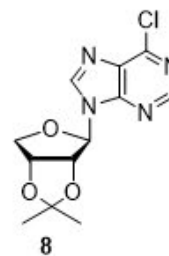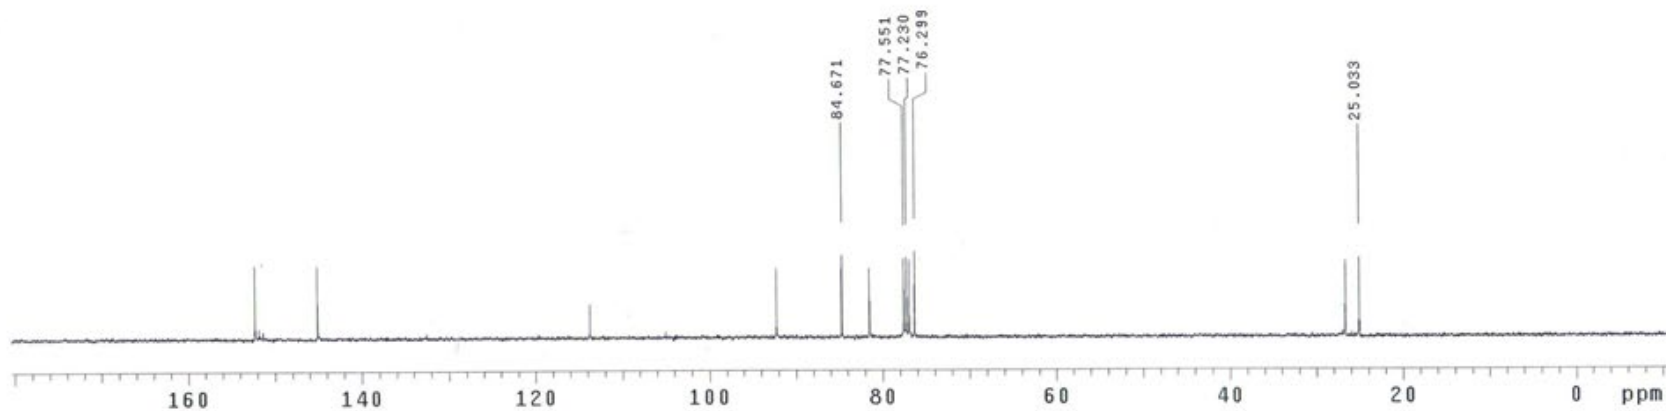

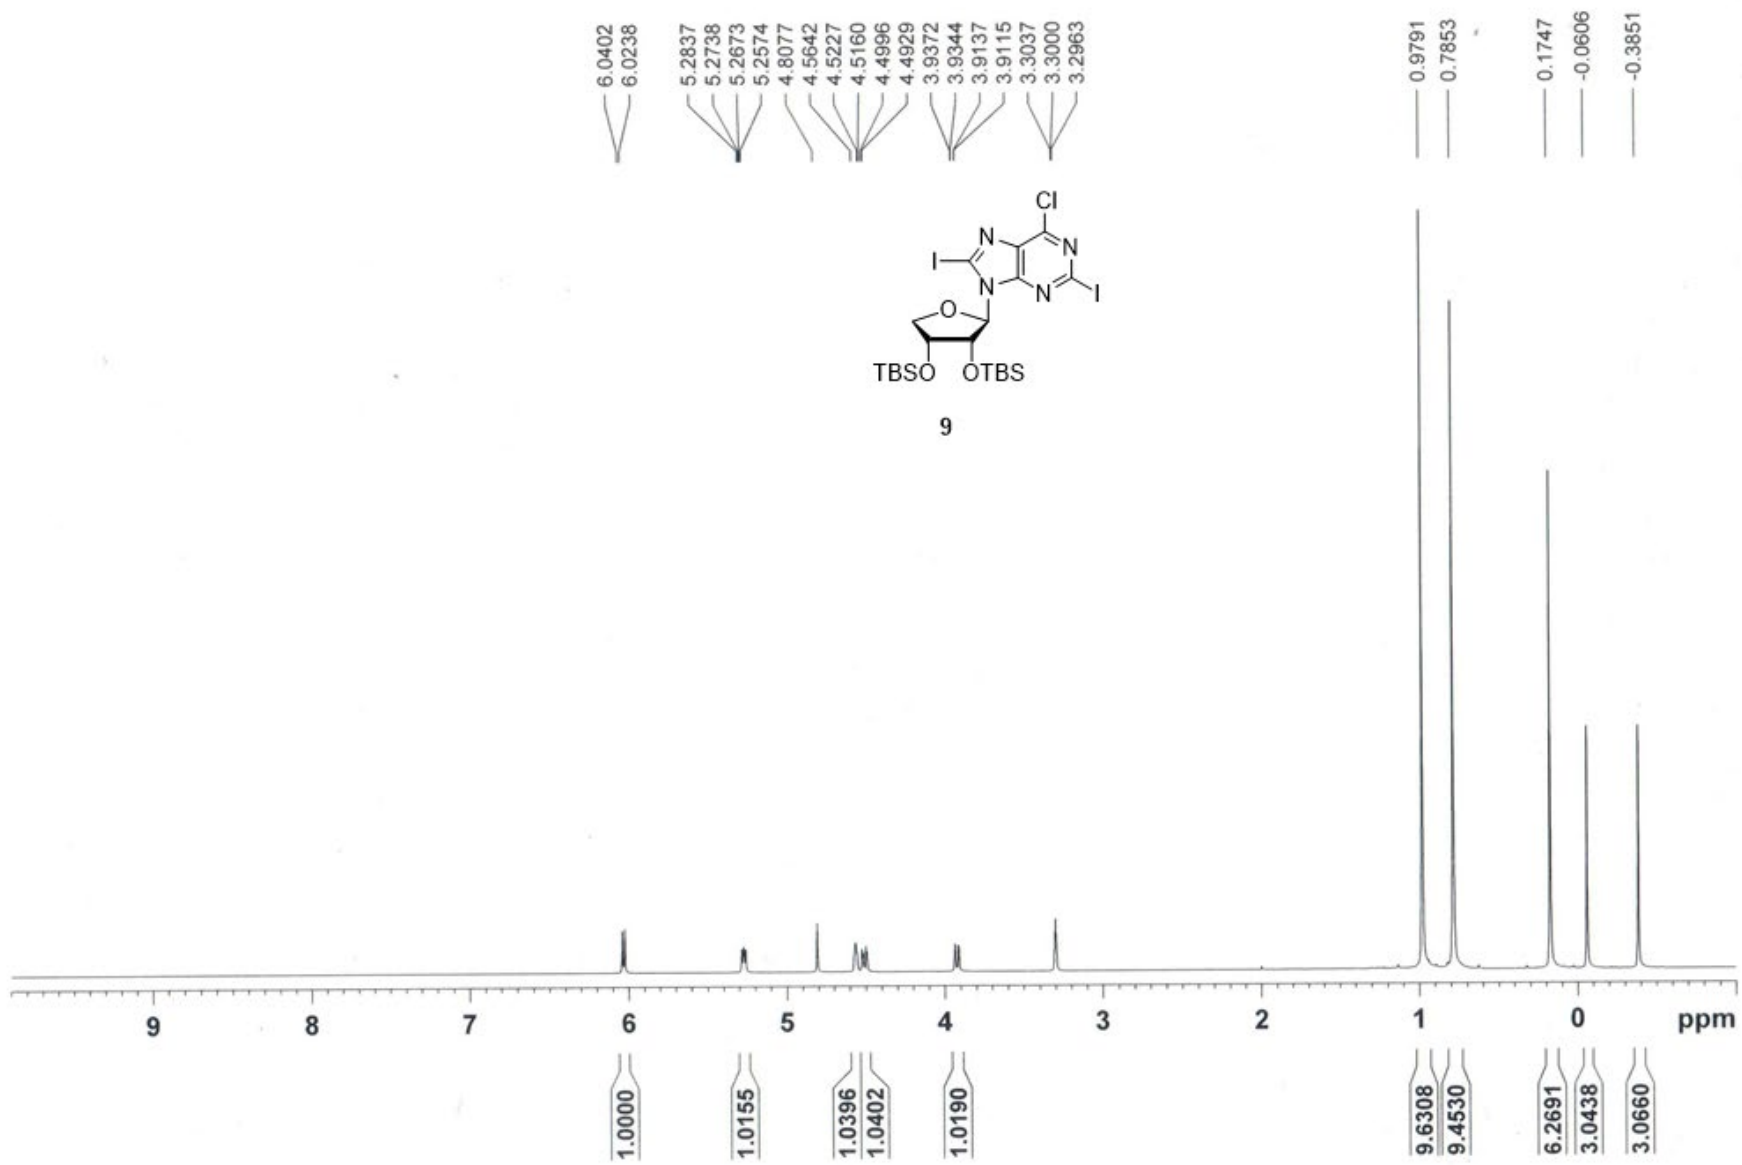

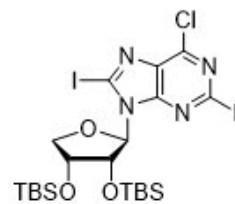

9

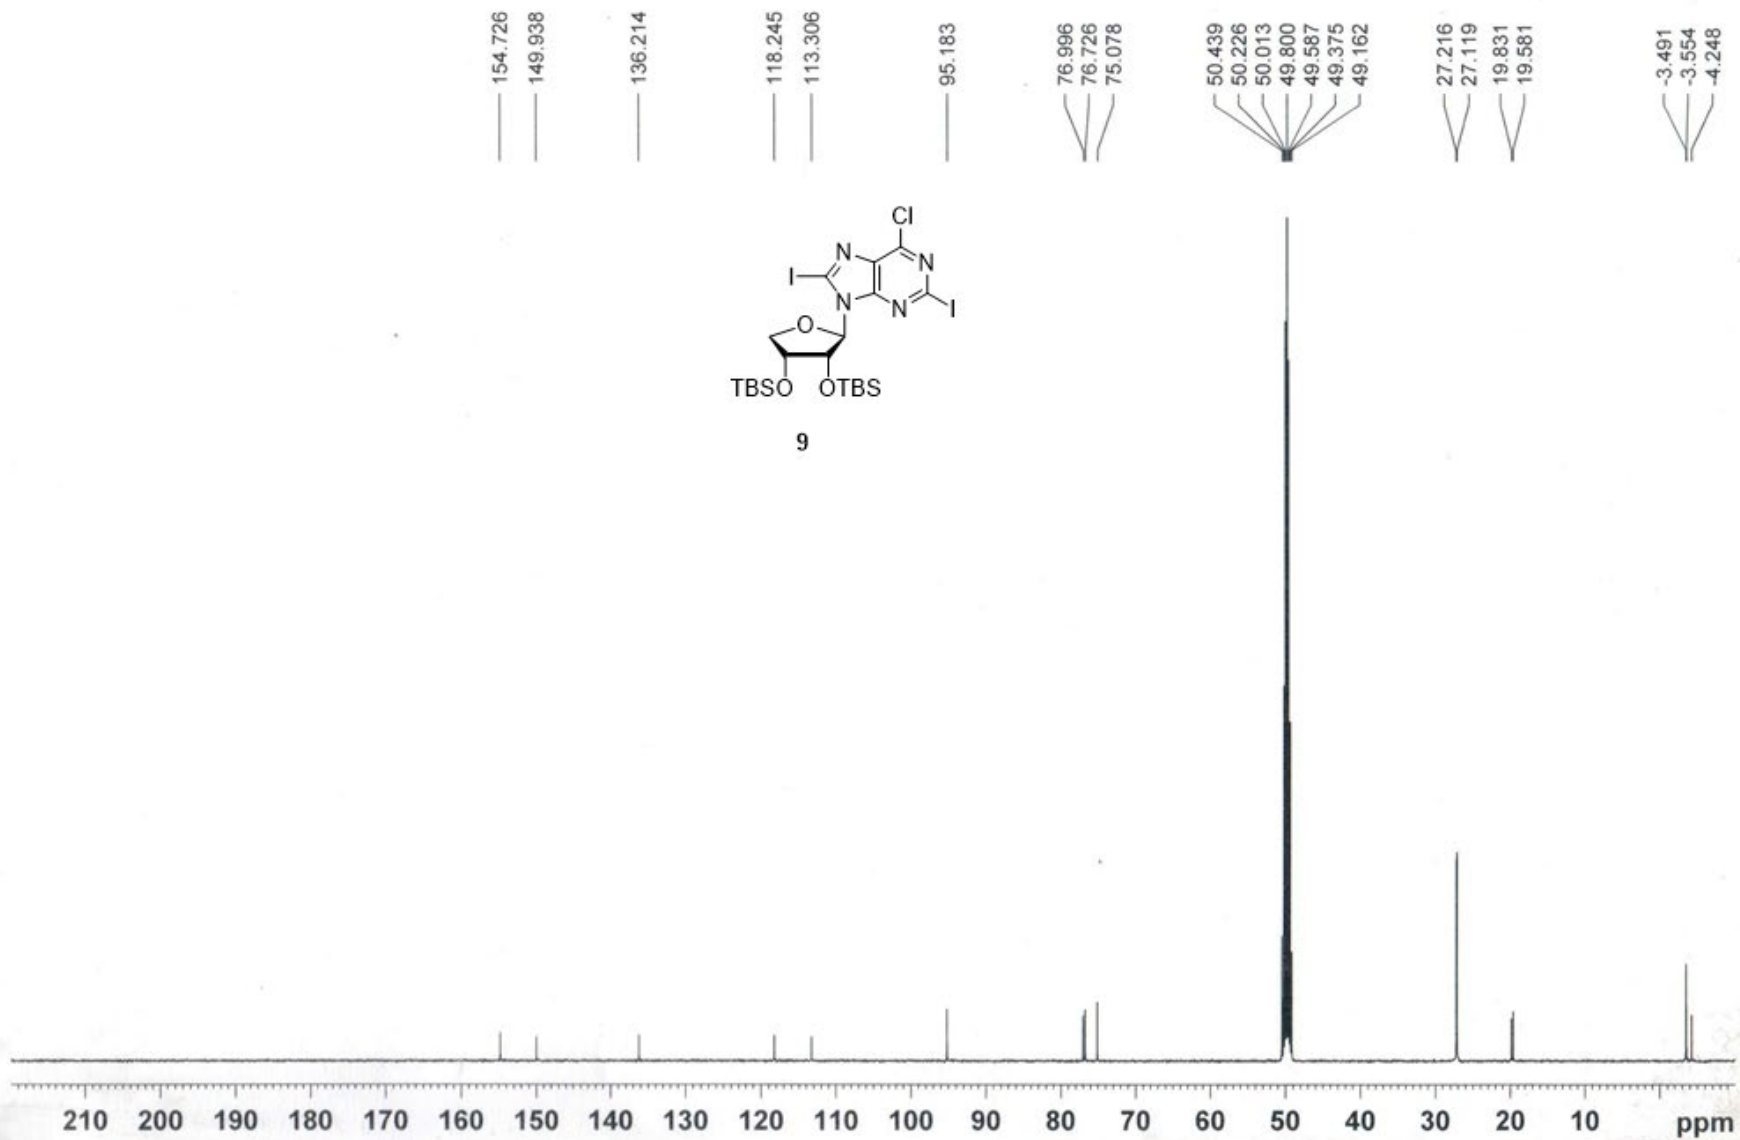

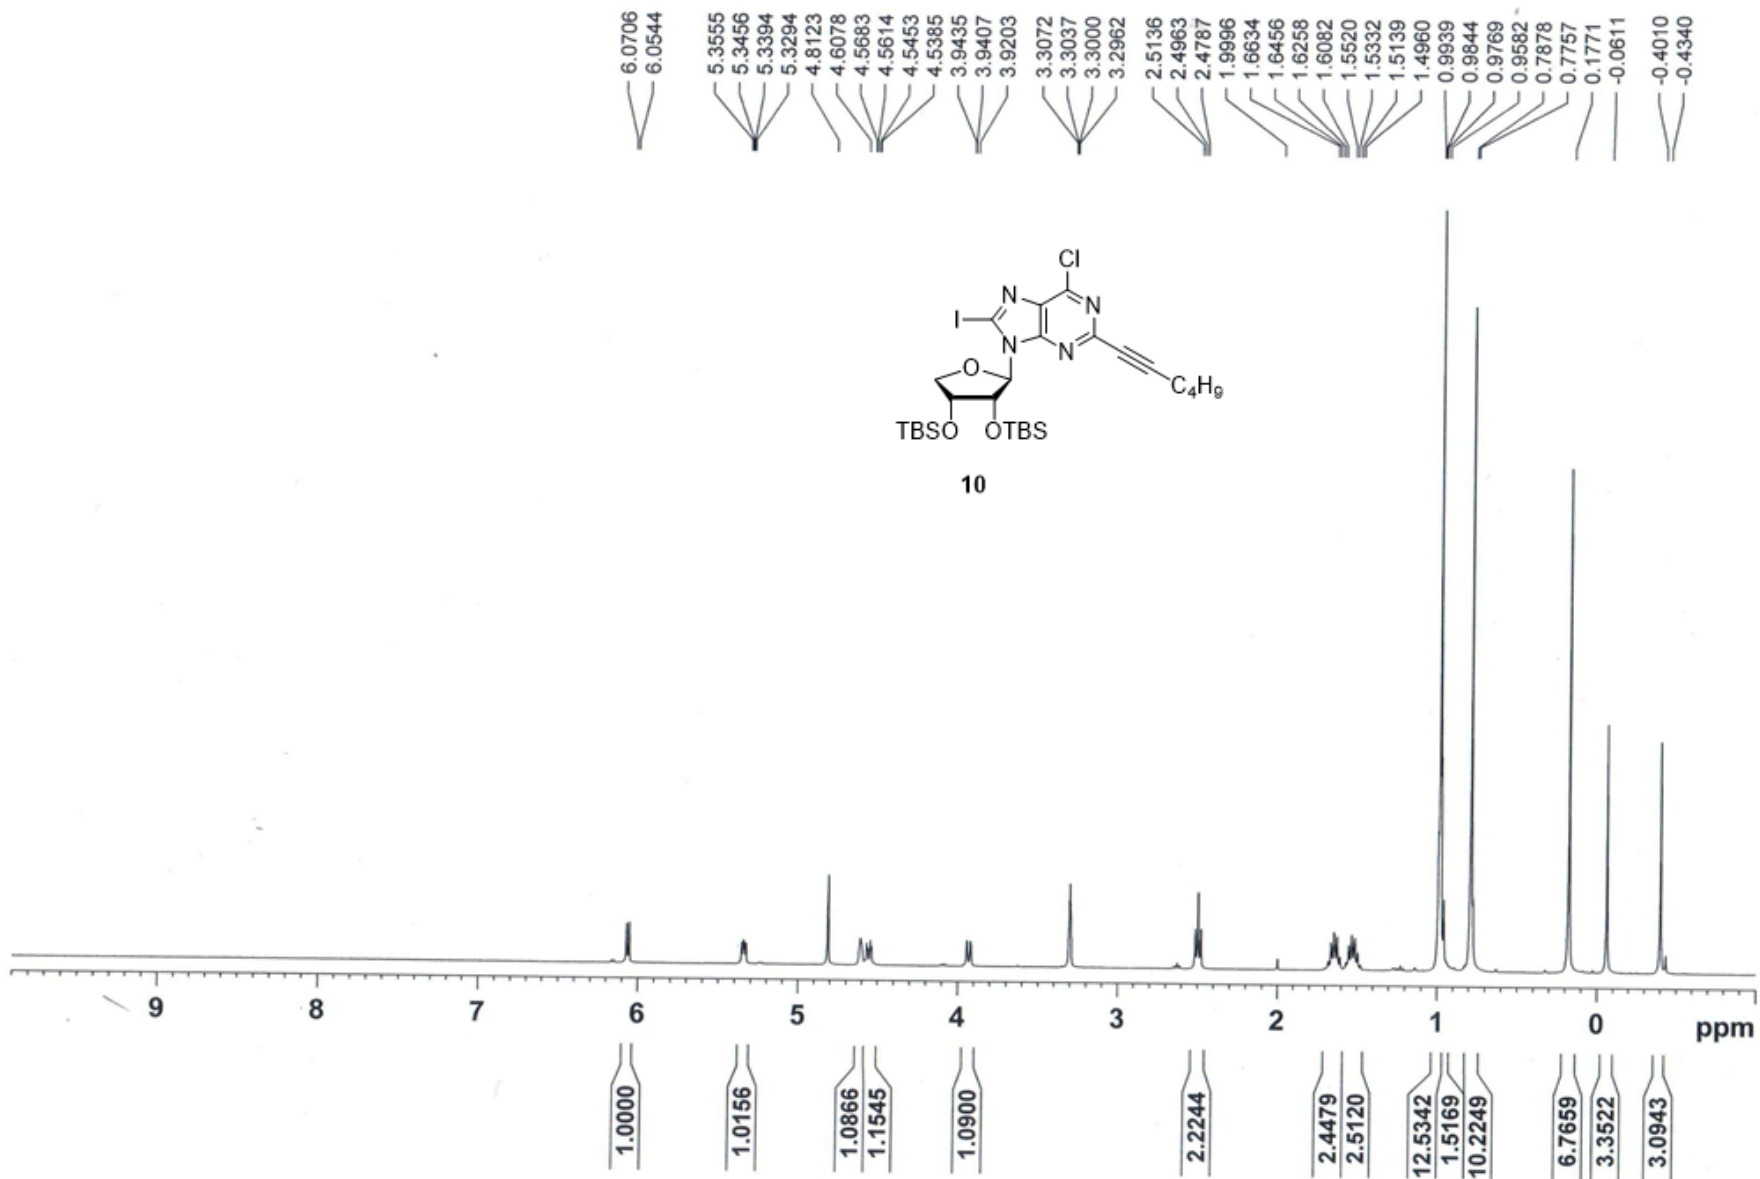

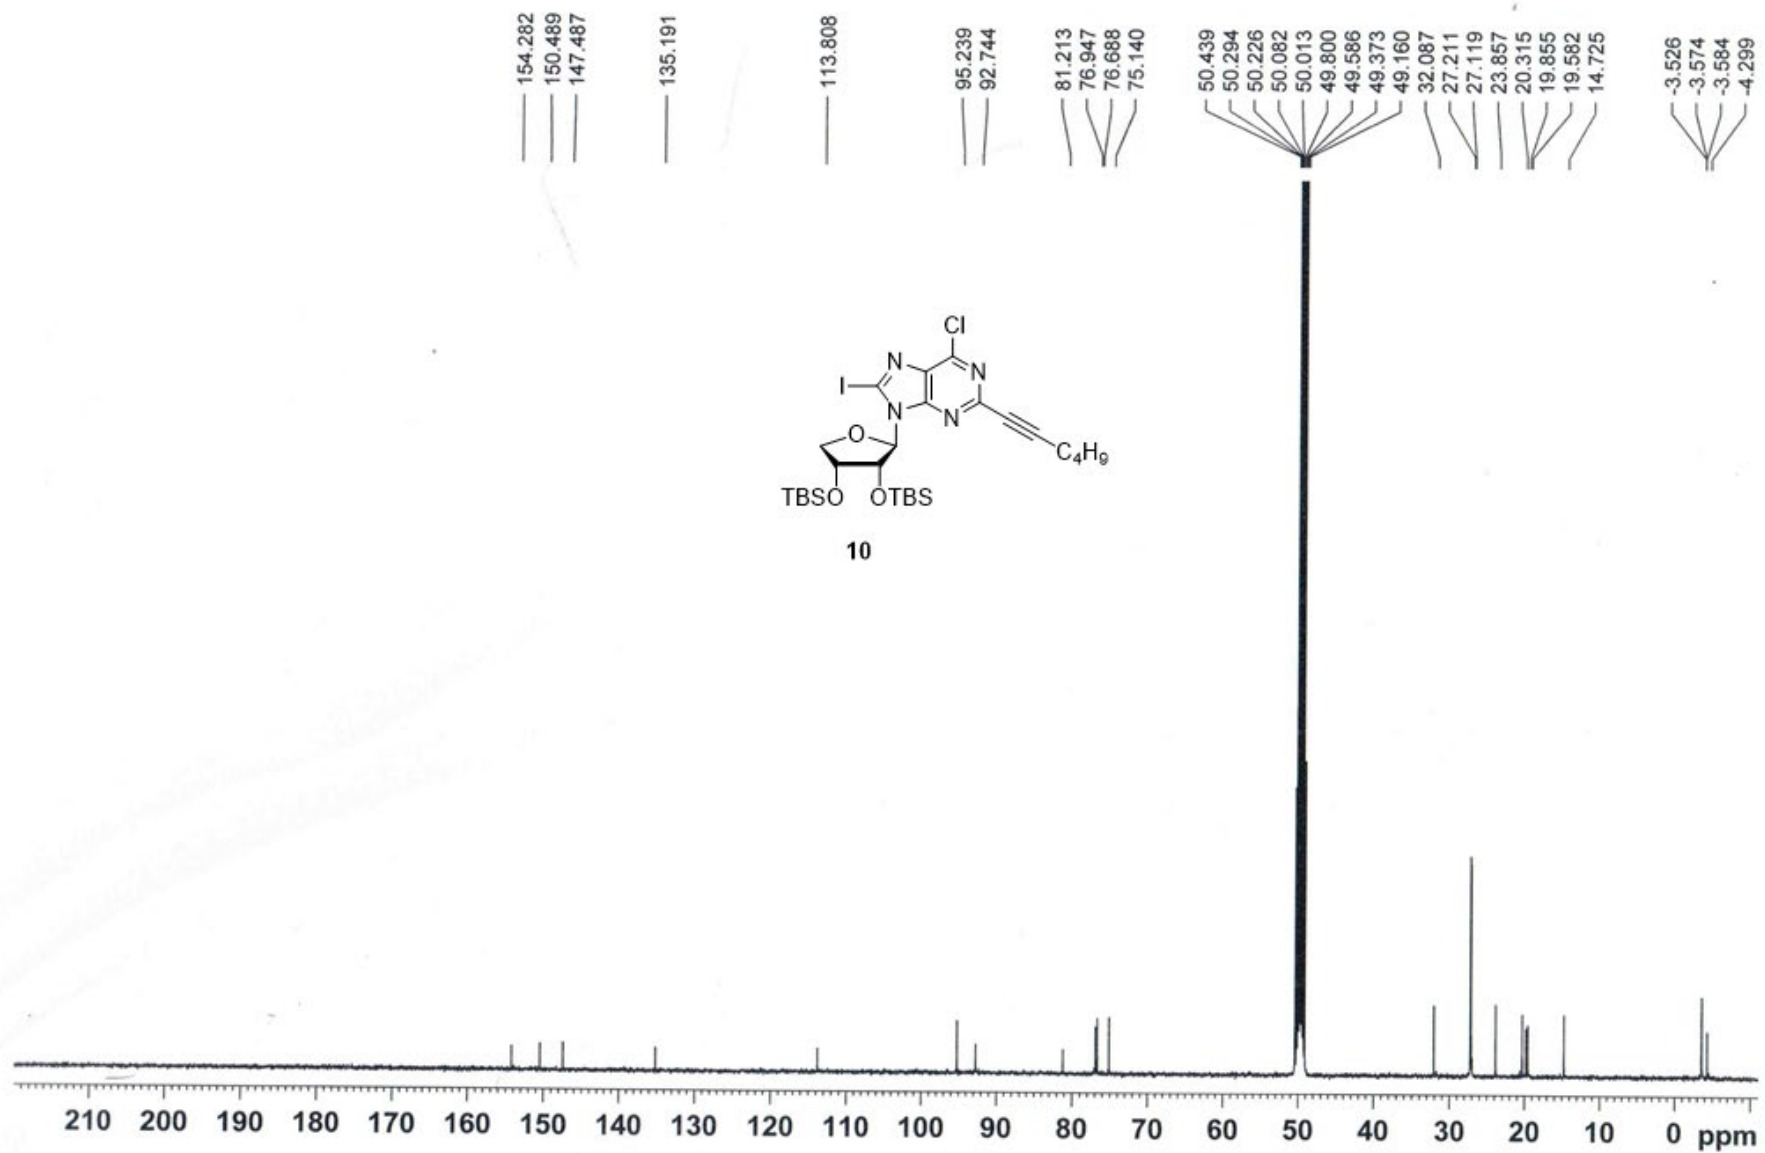



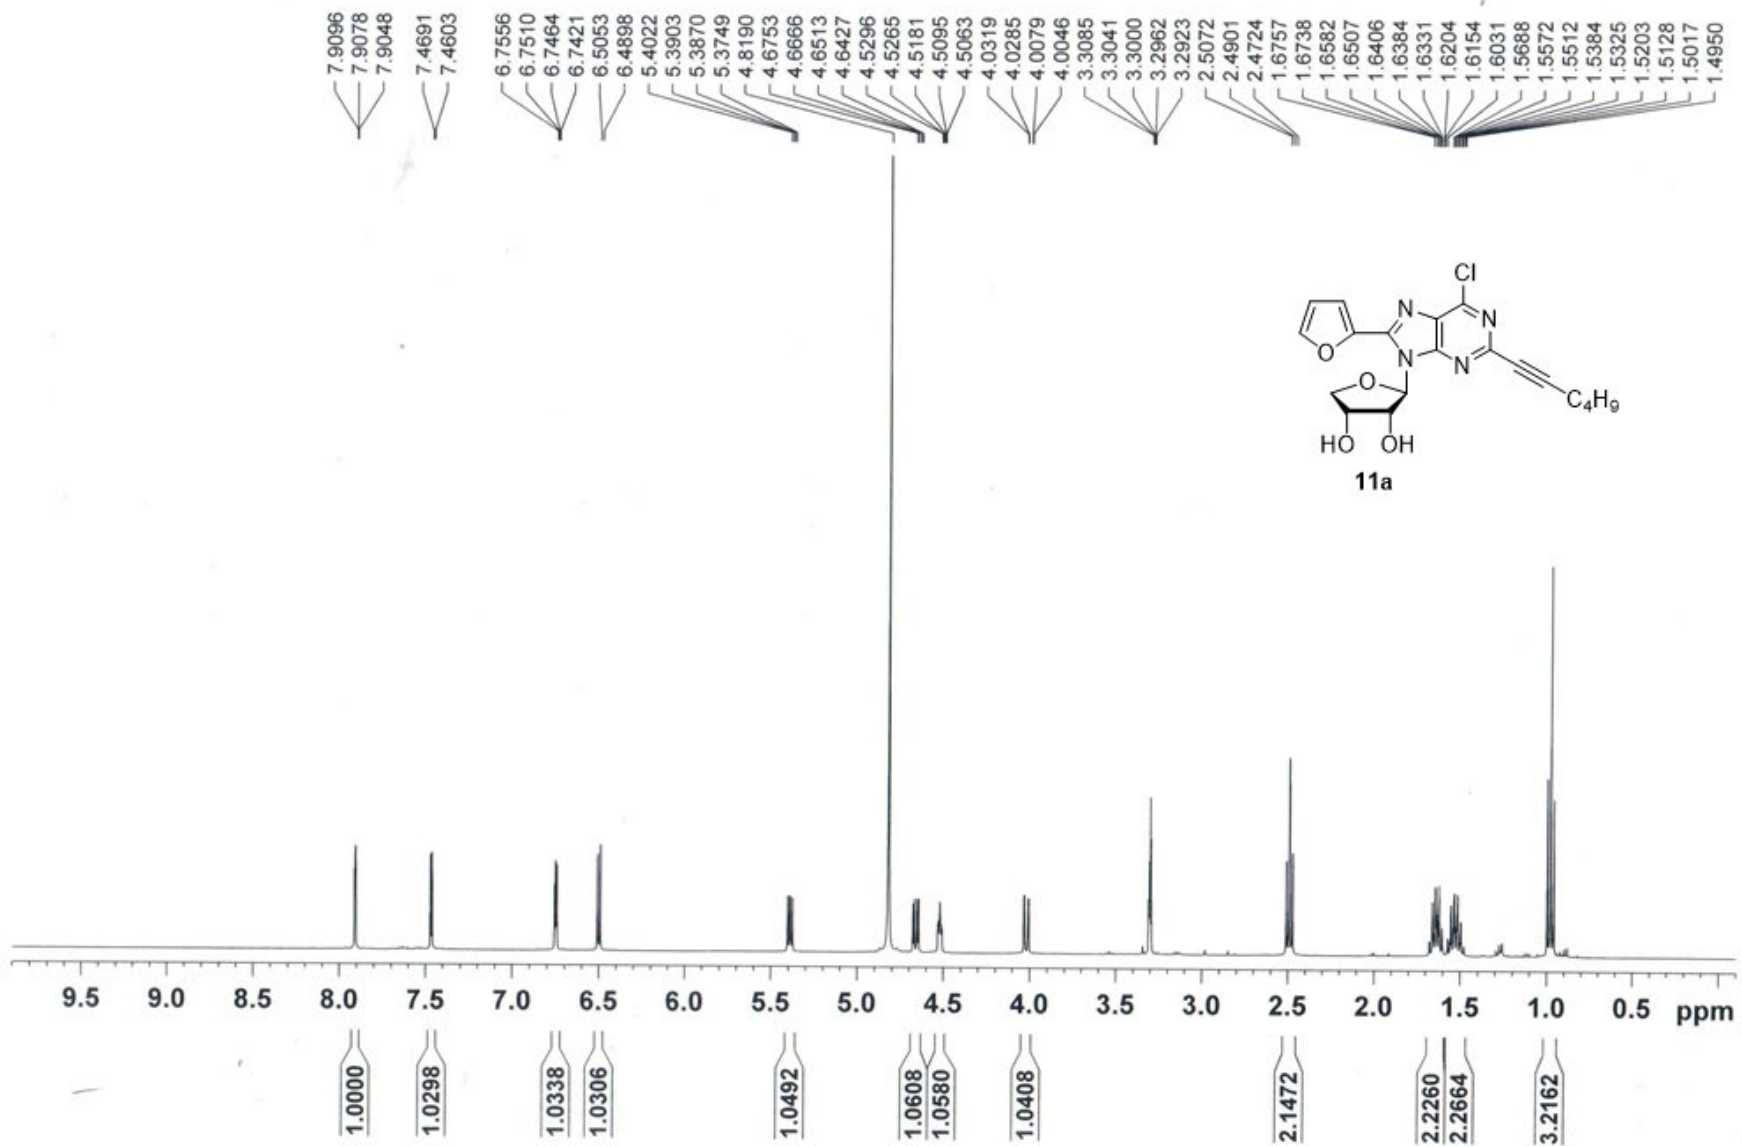

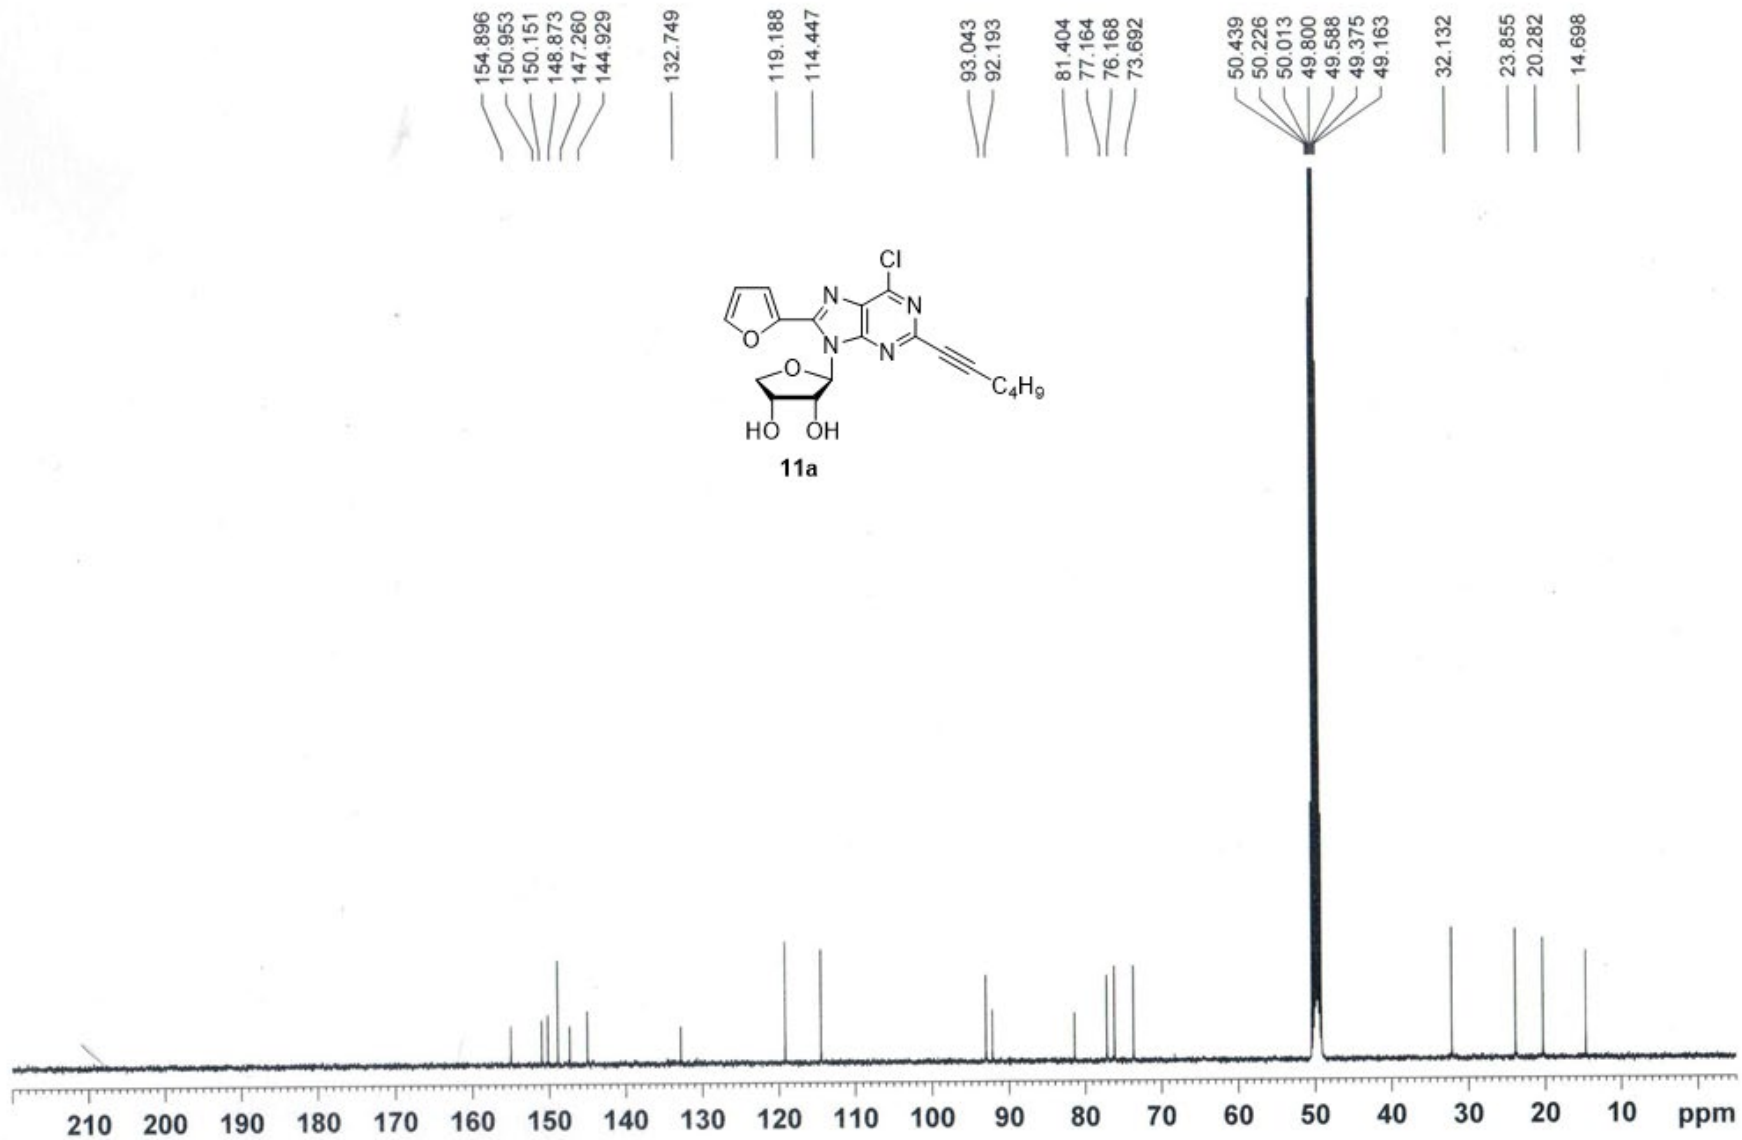

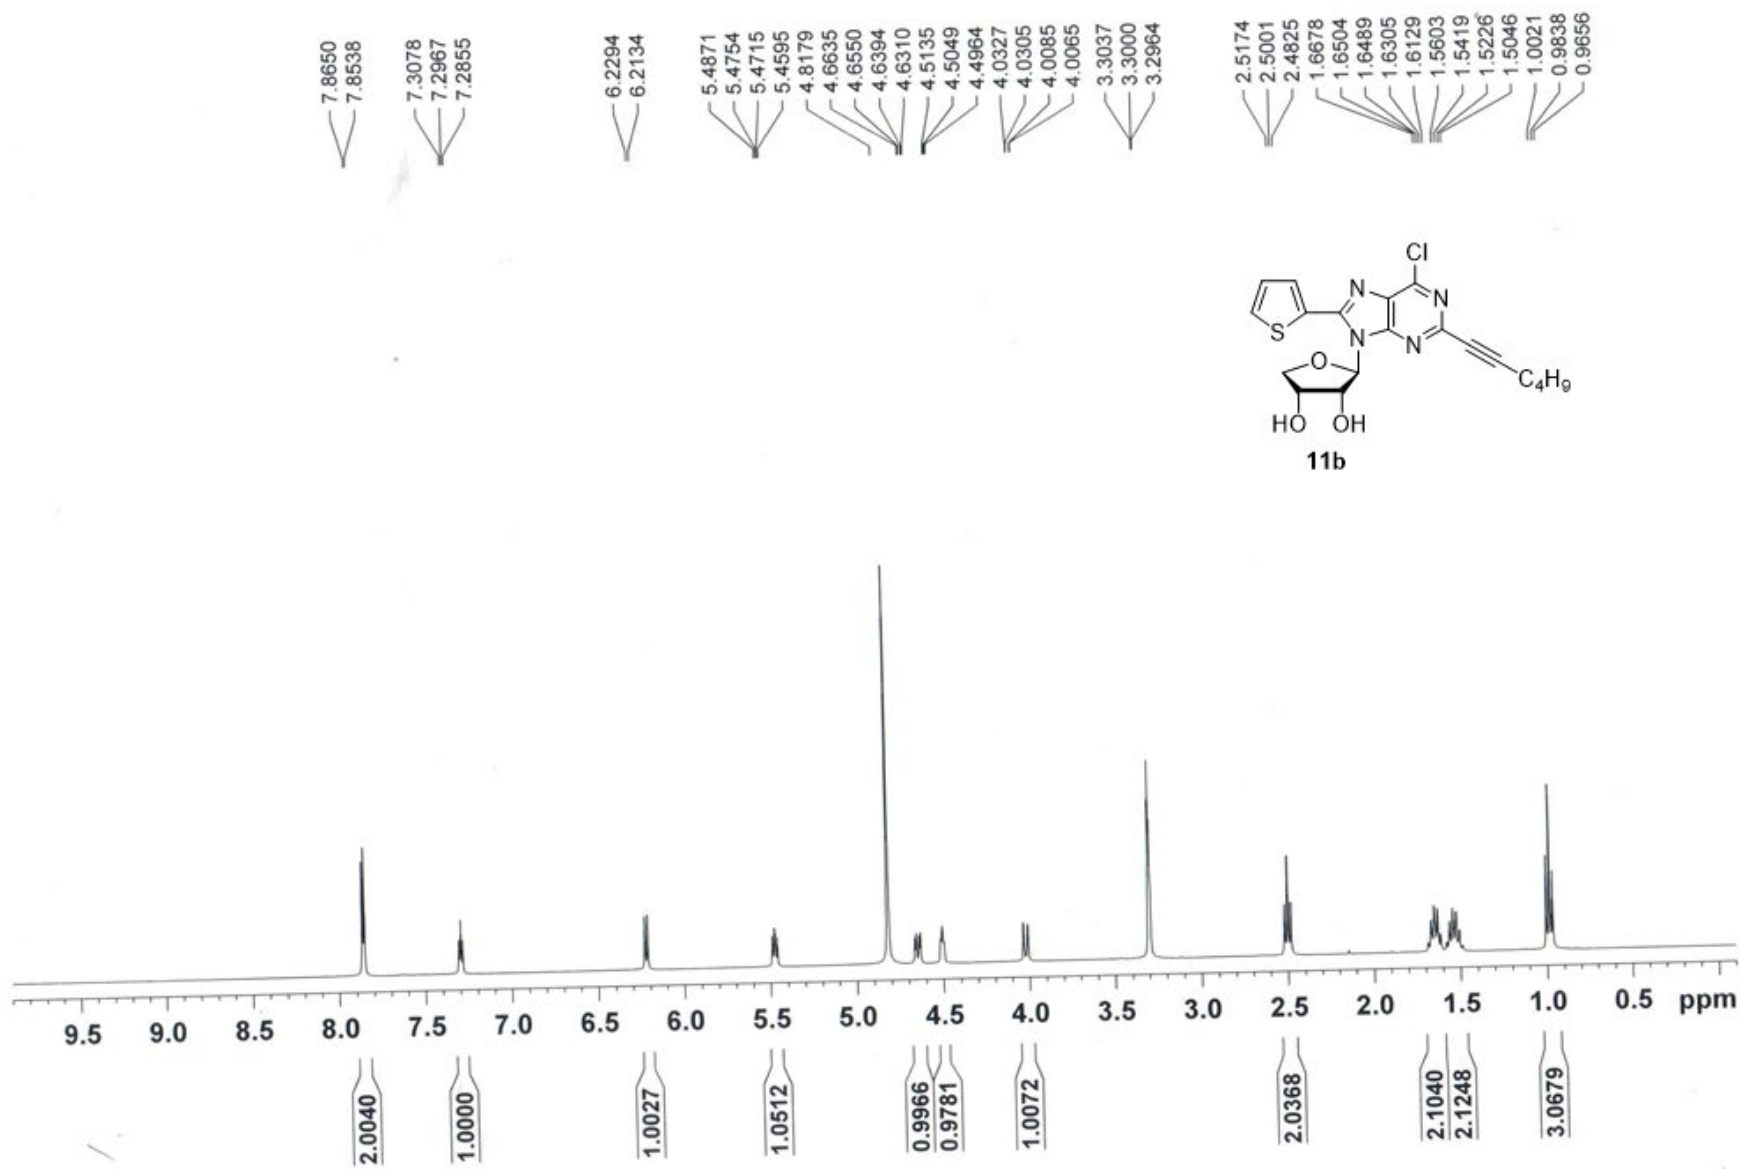

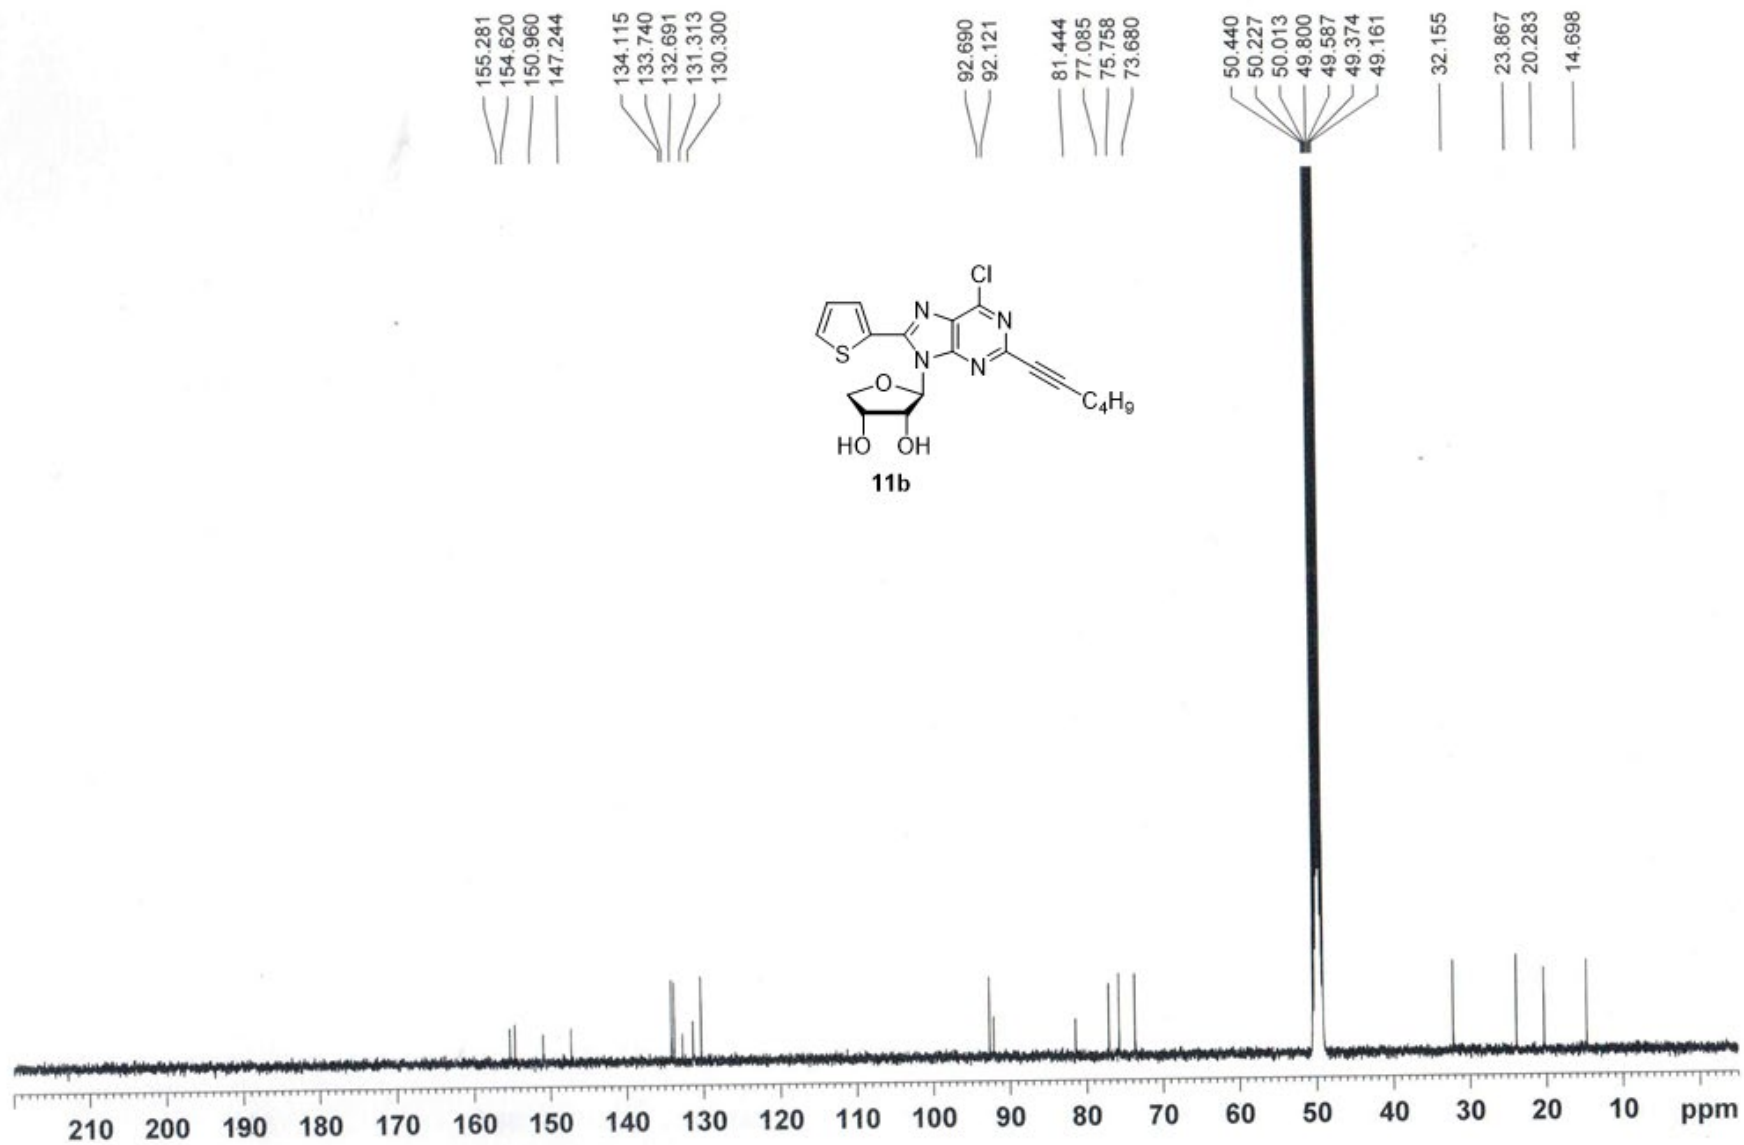

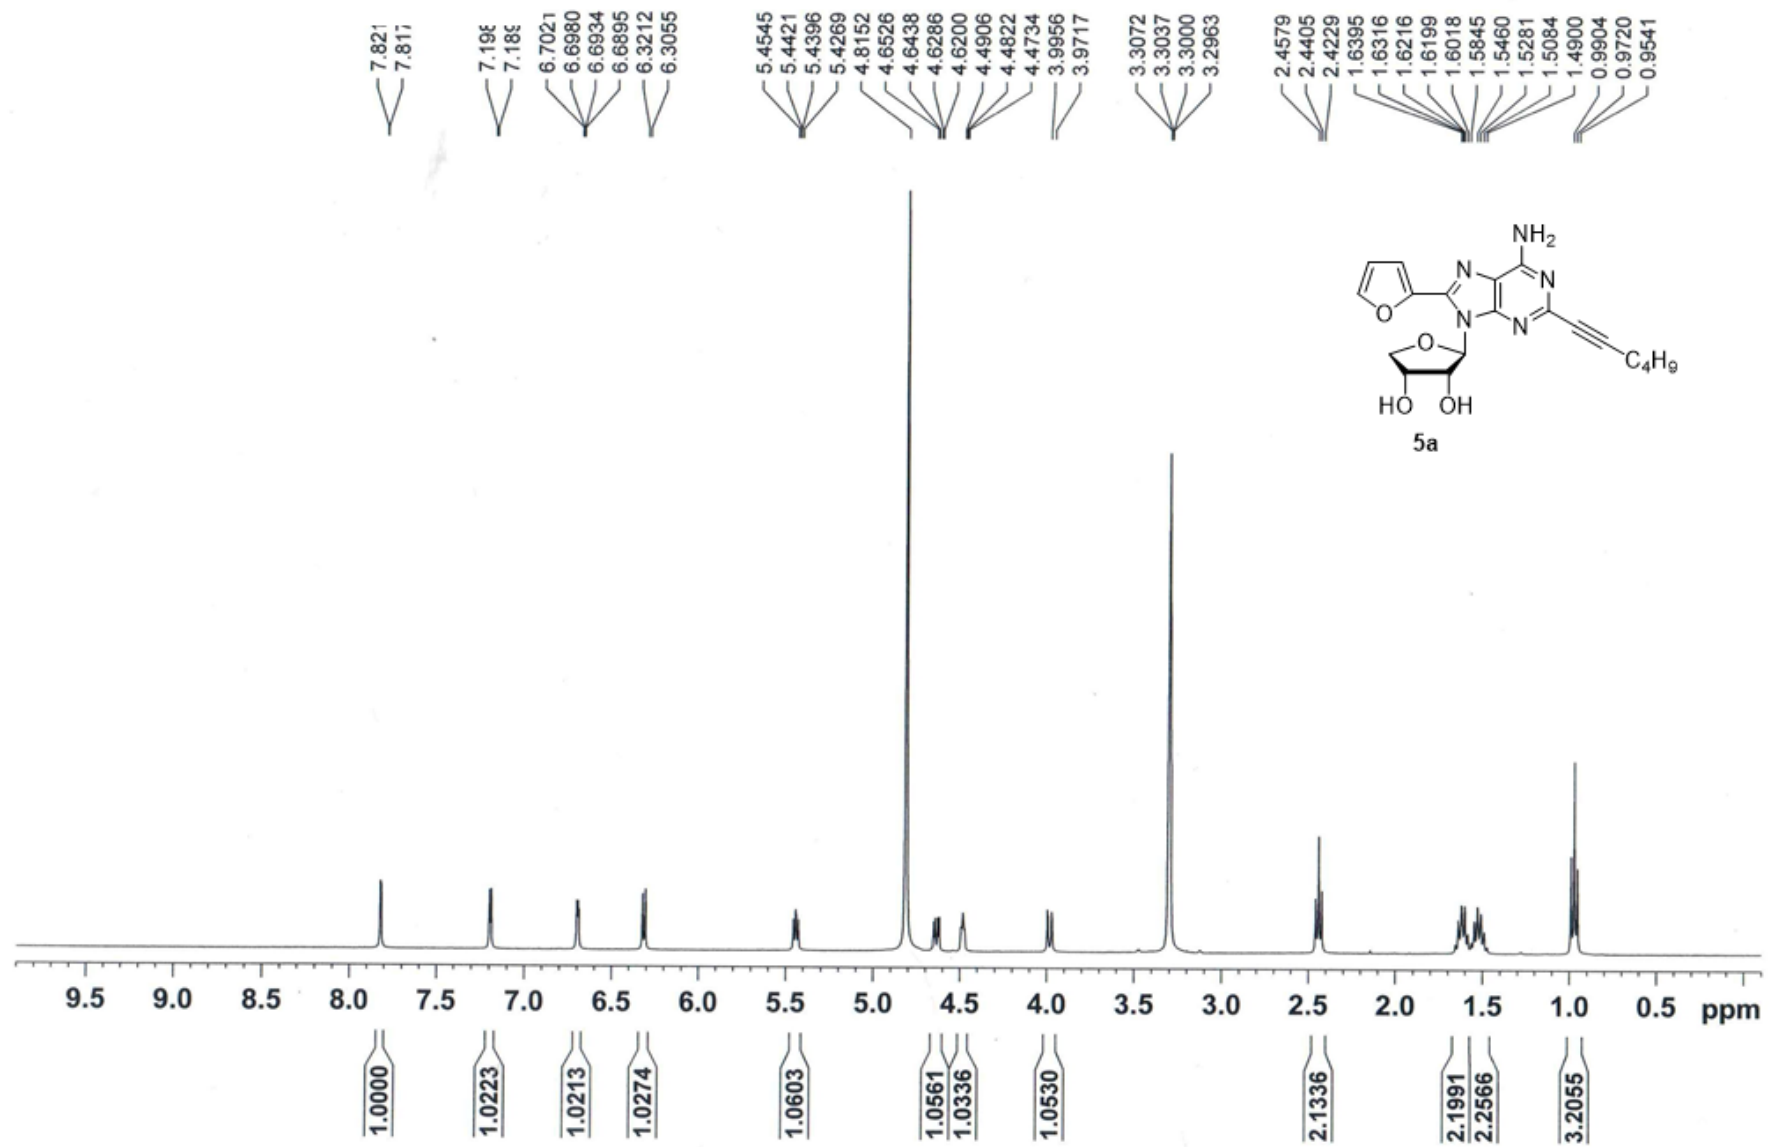

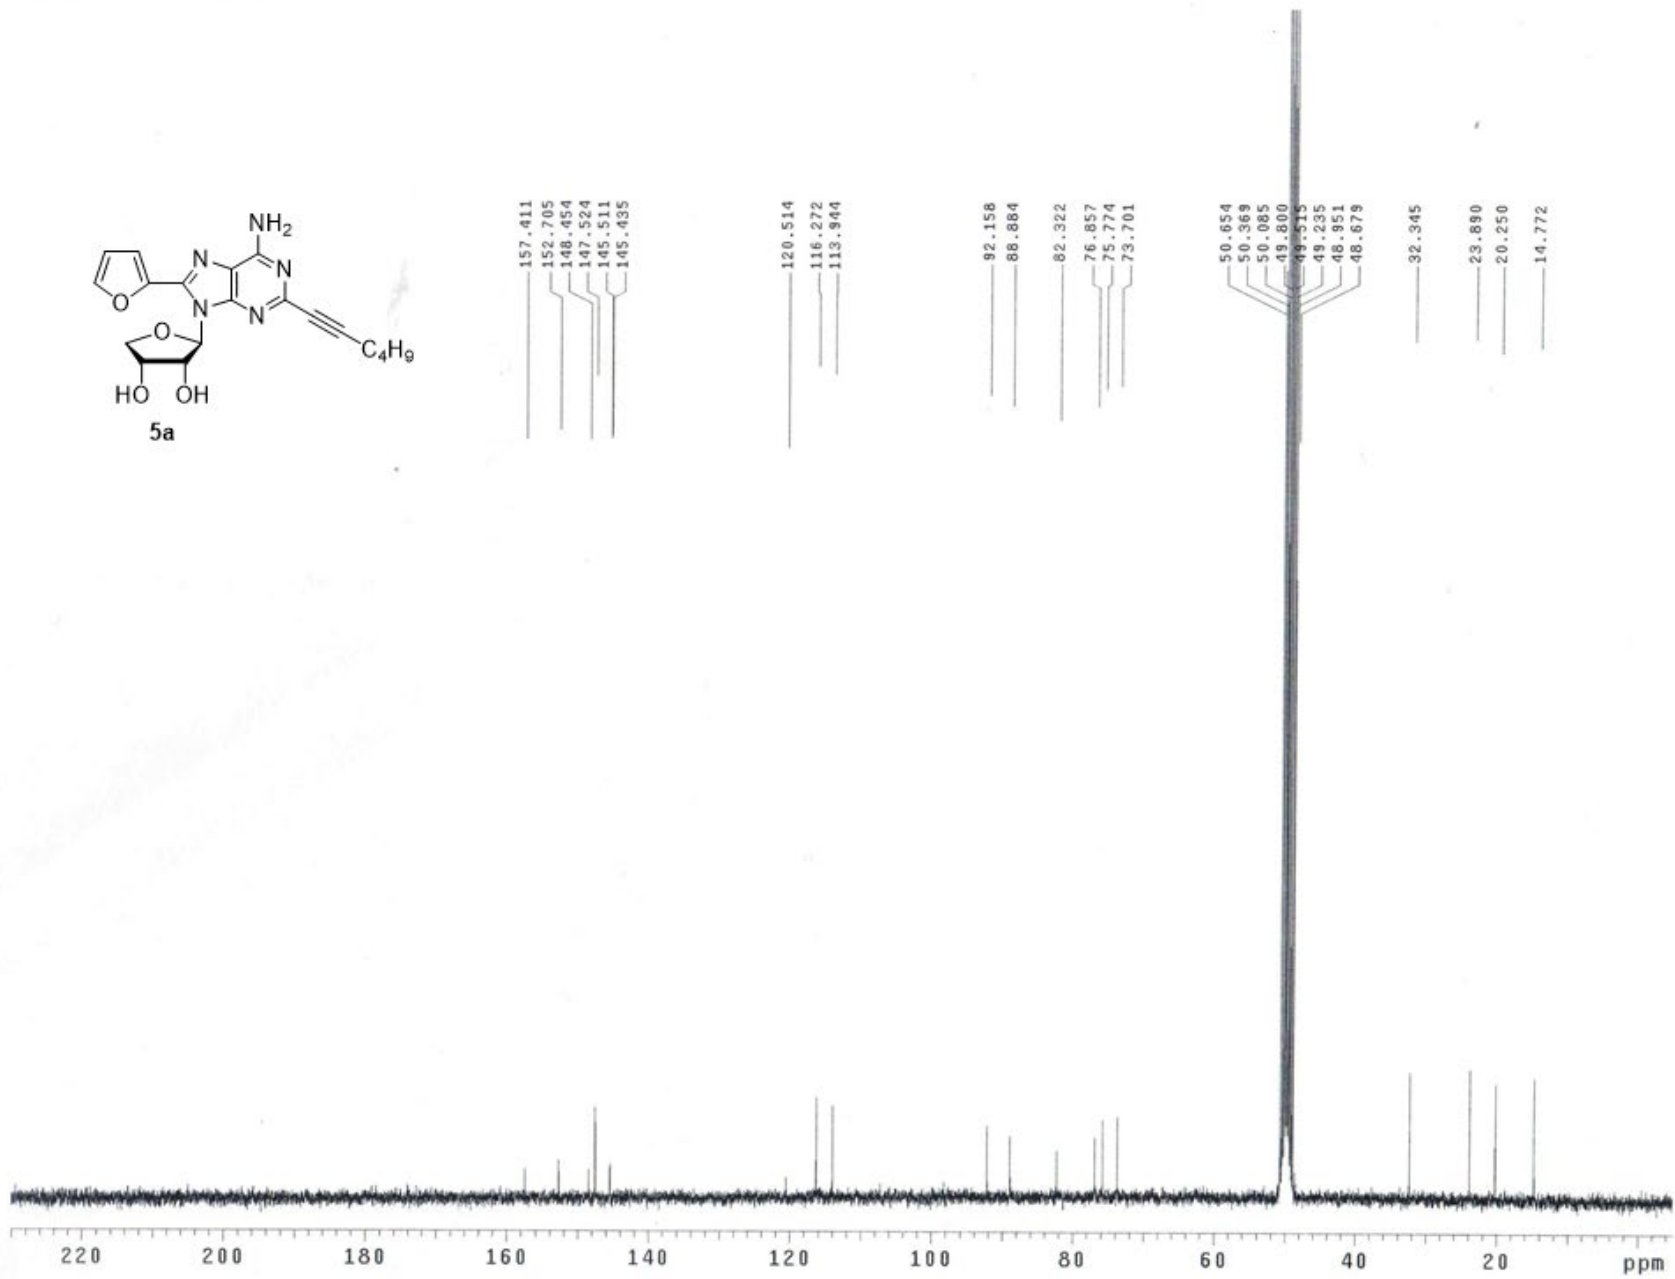

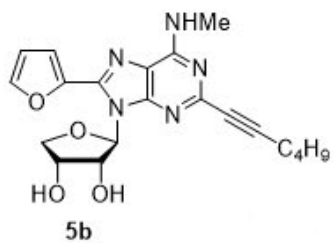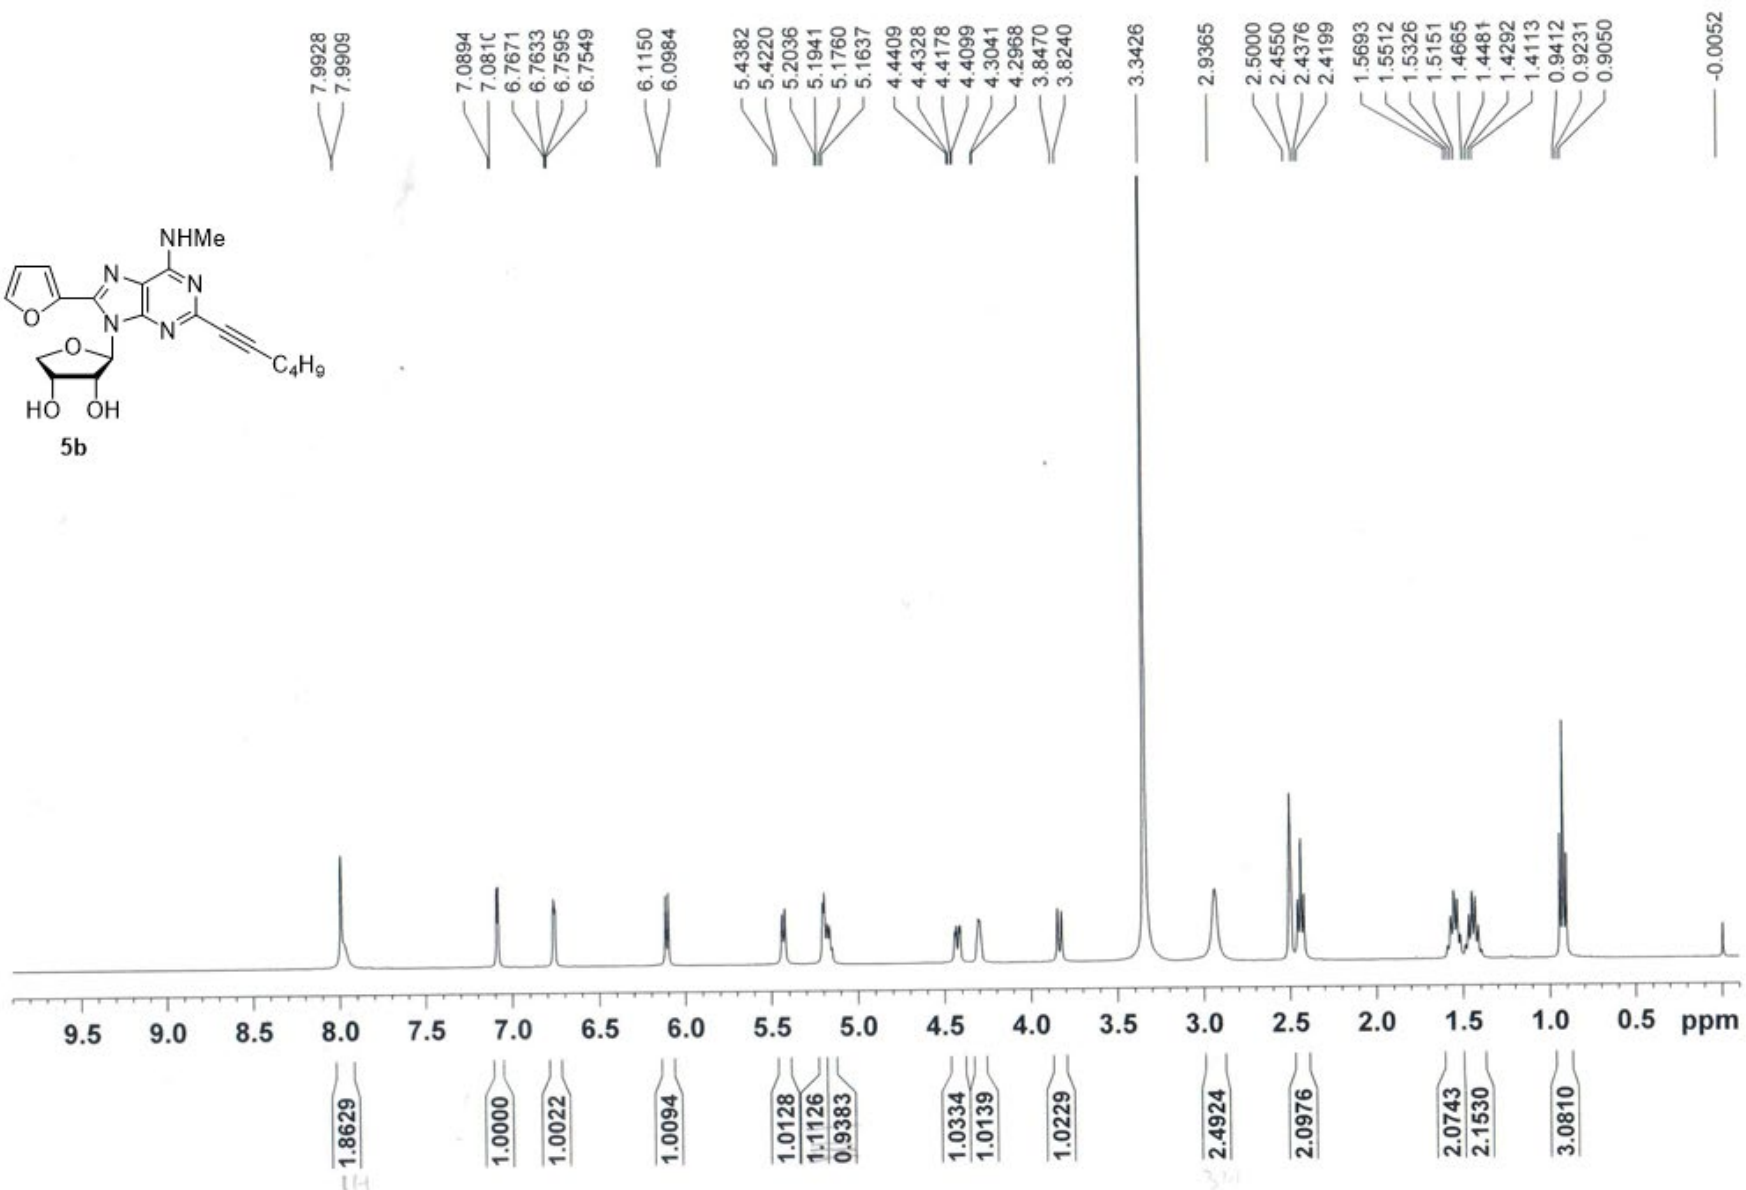

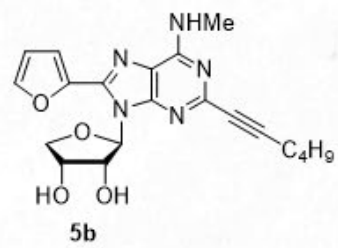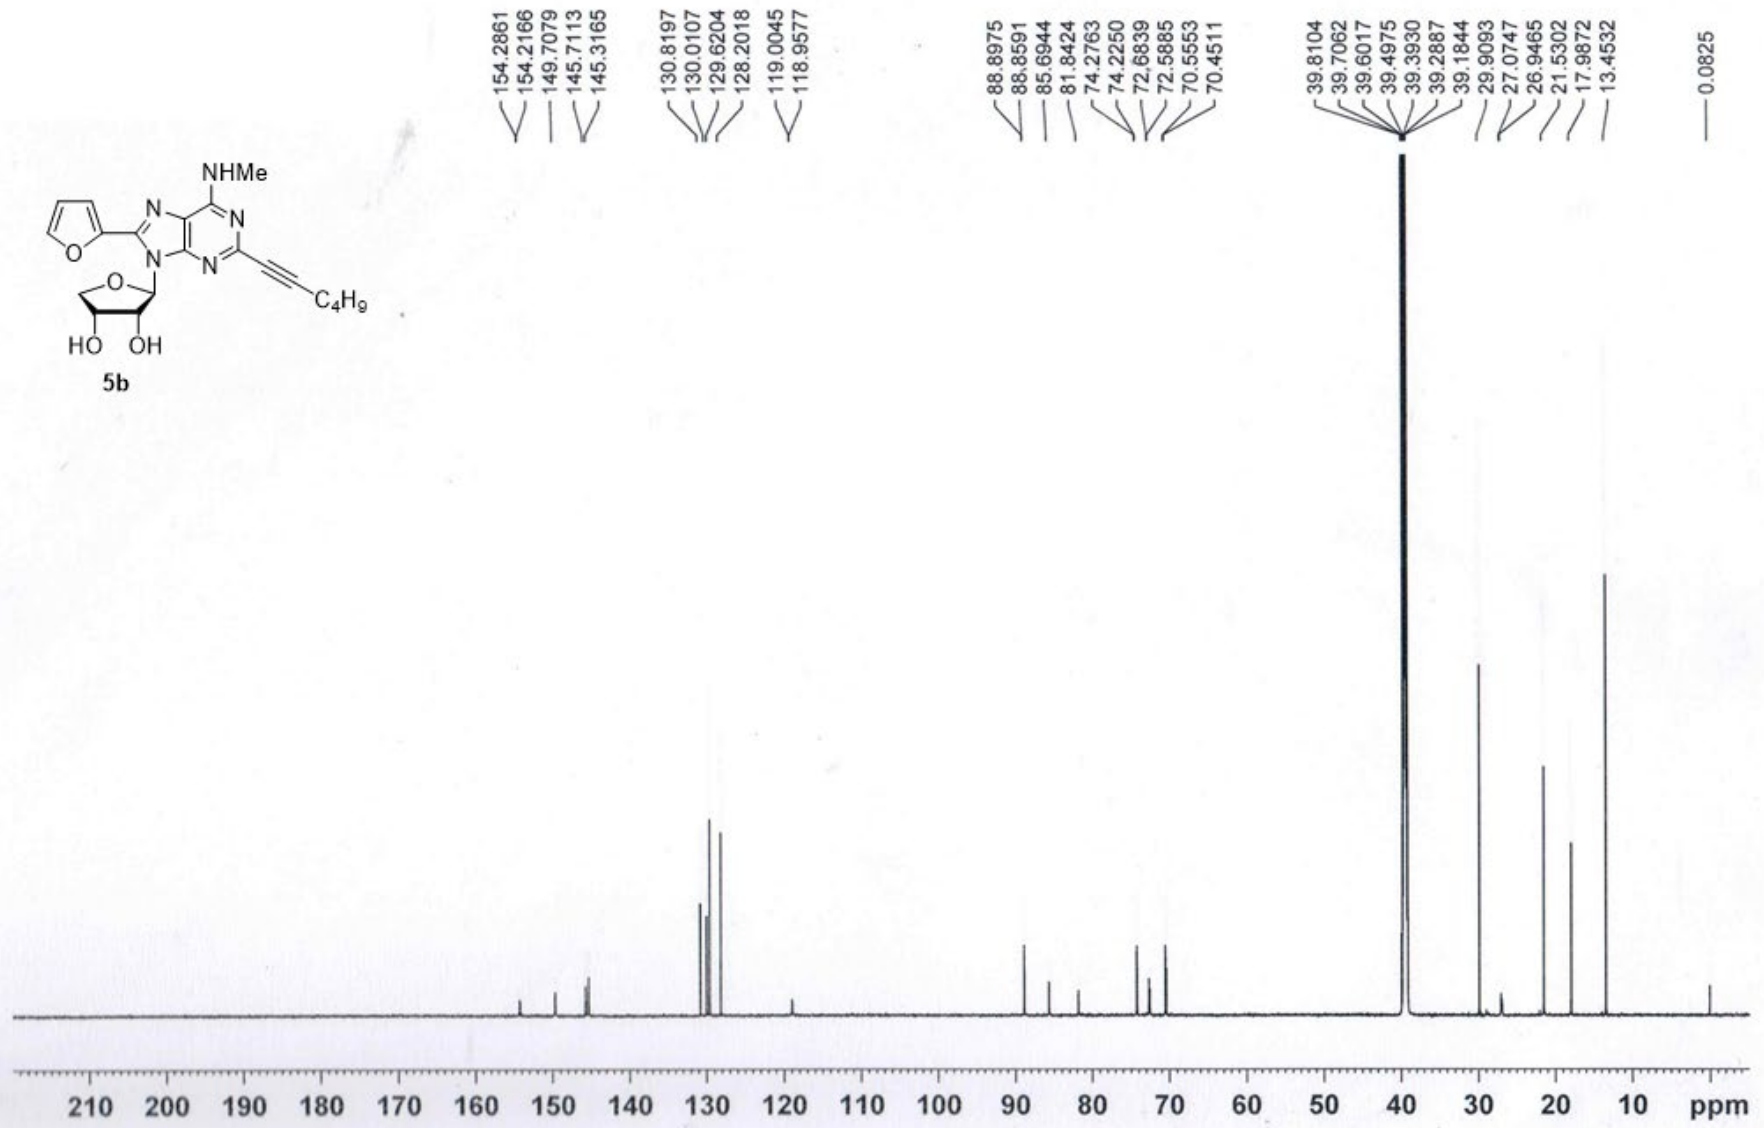



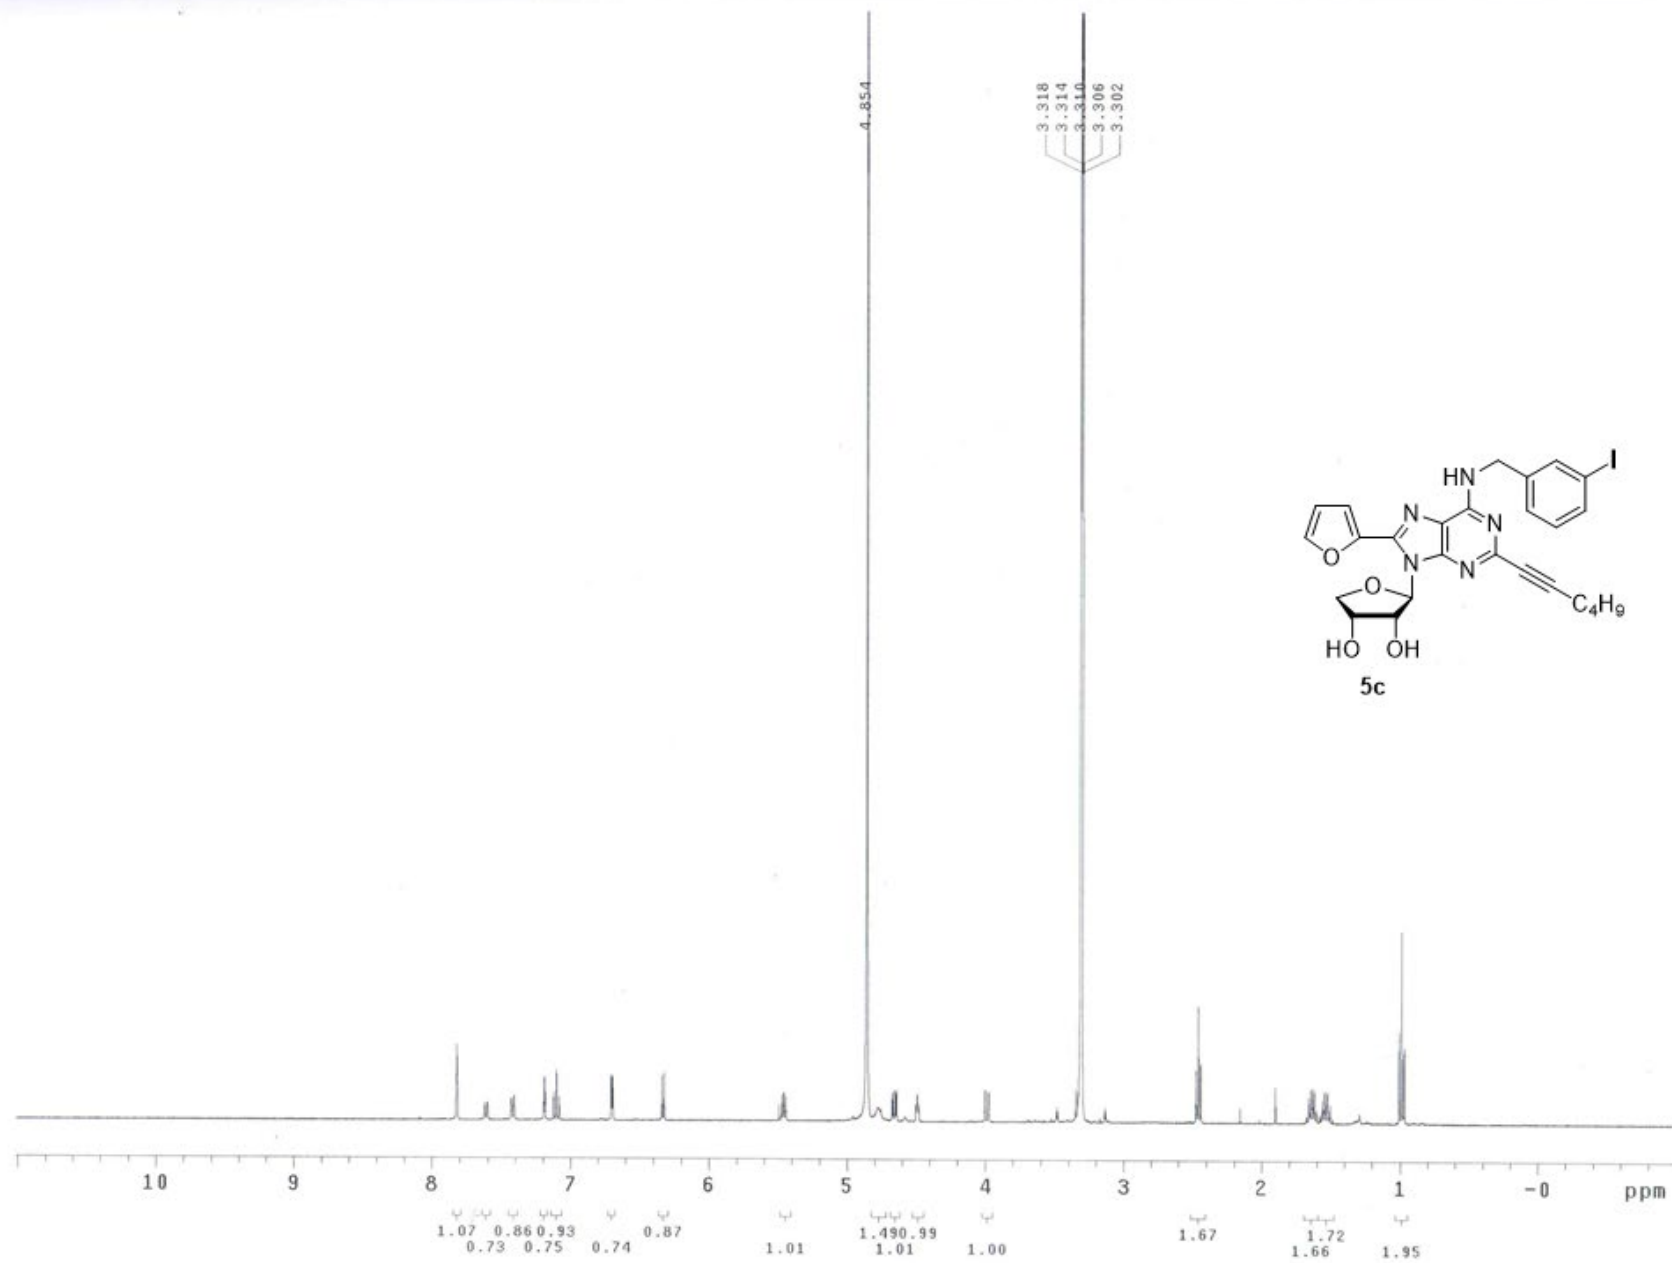

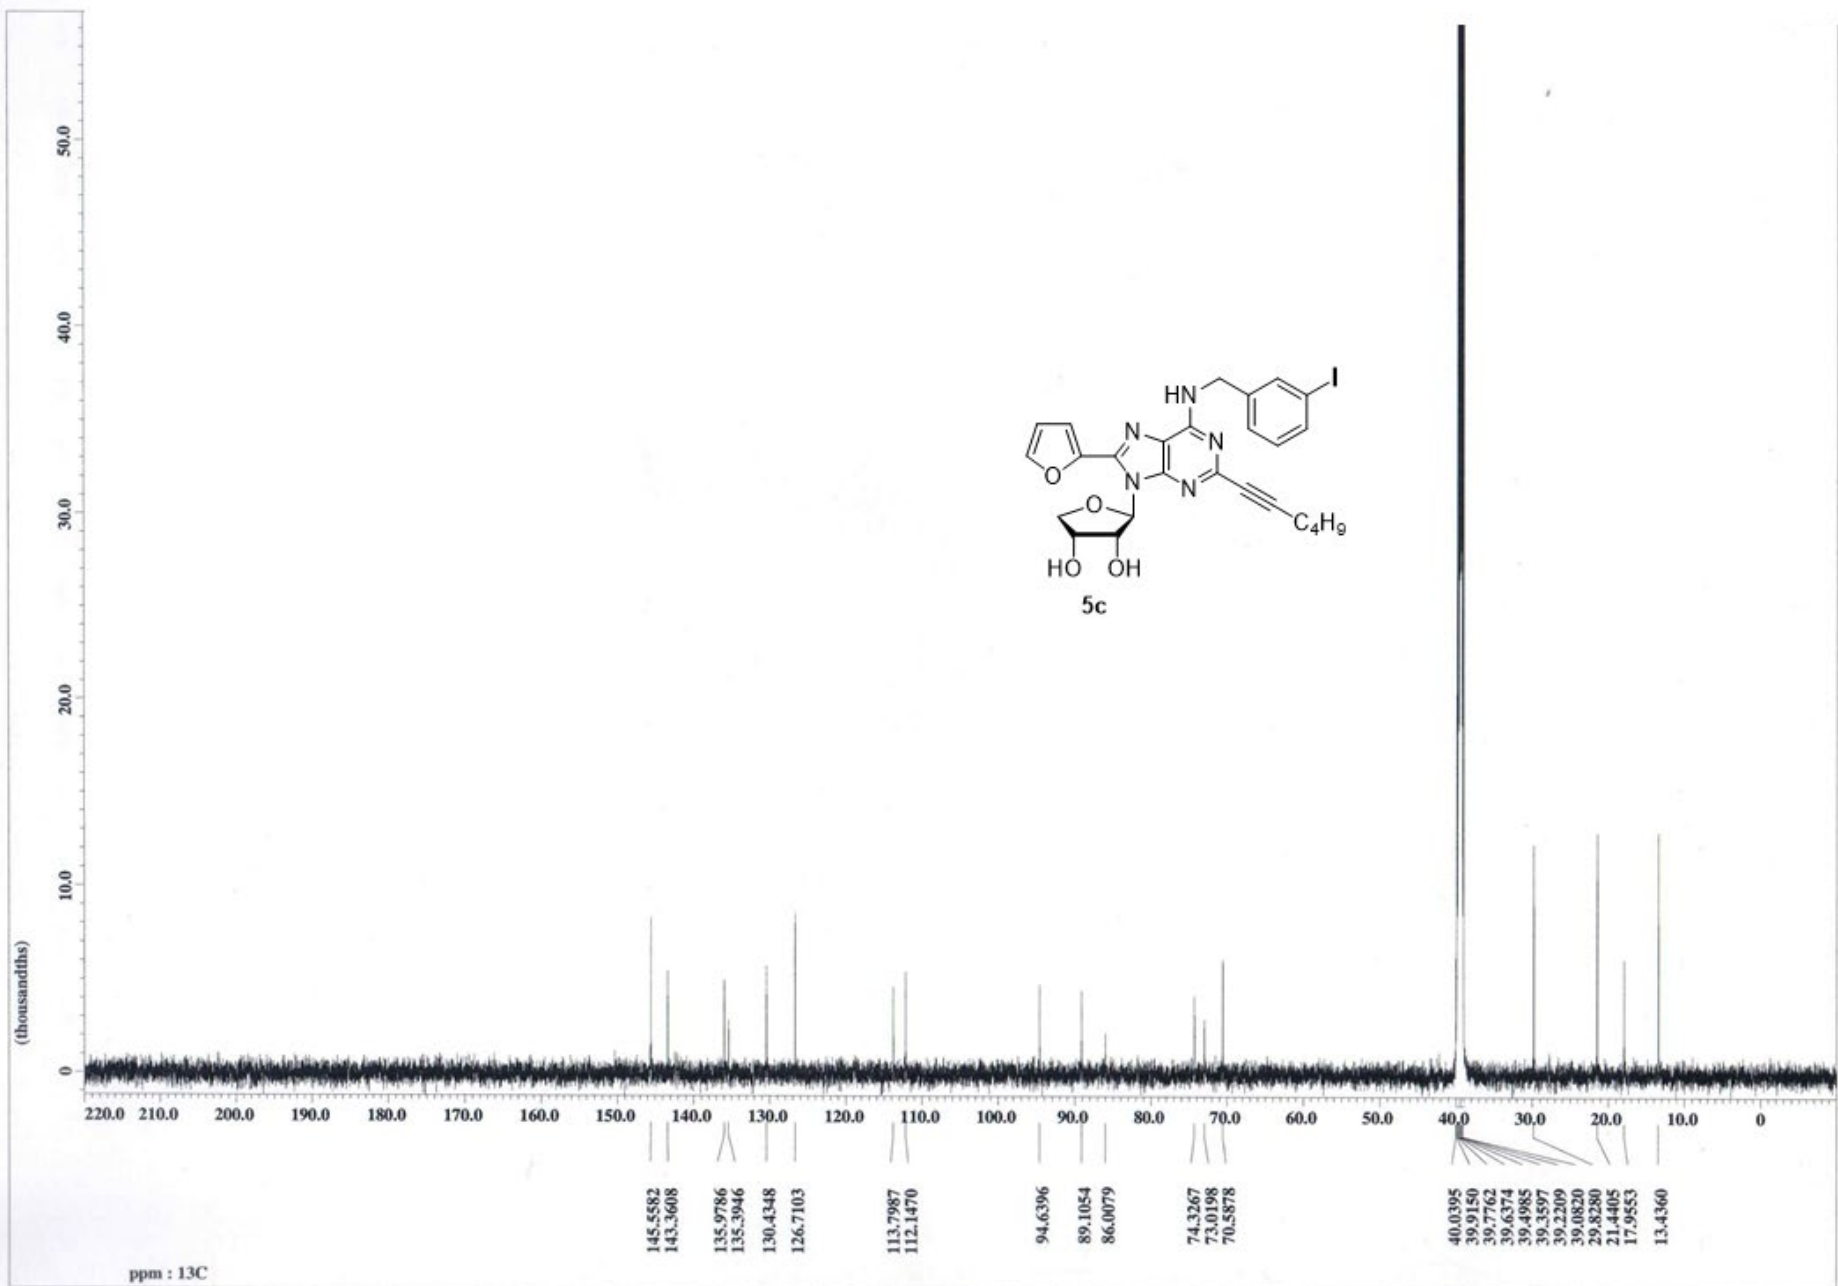

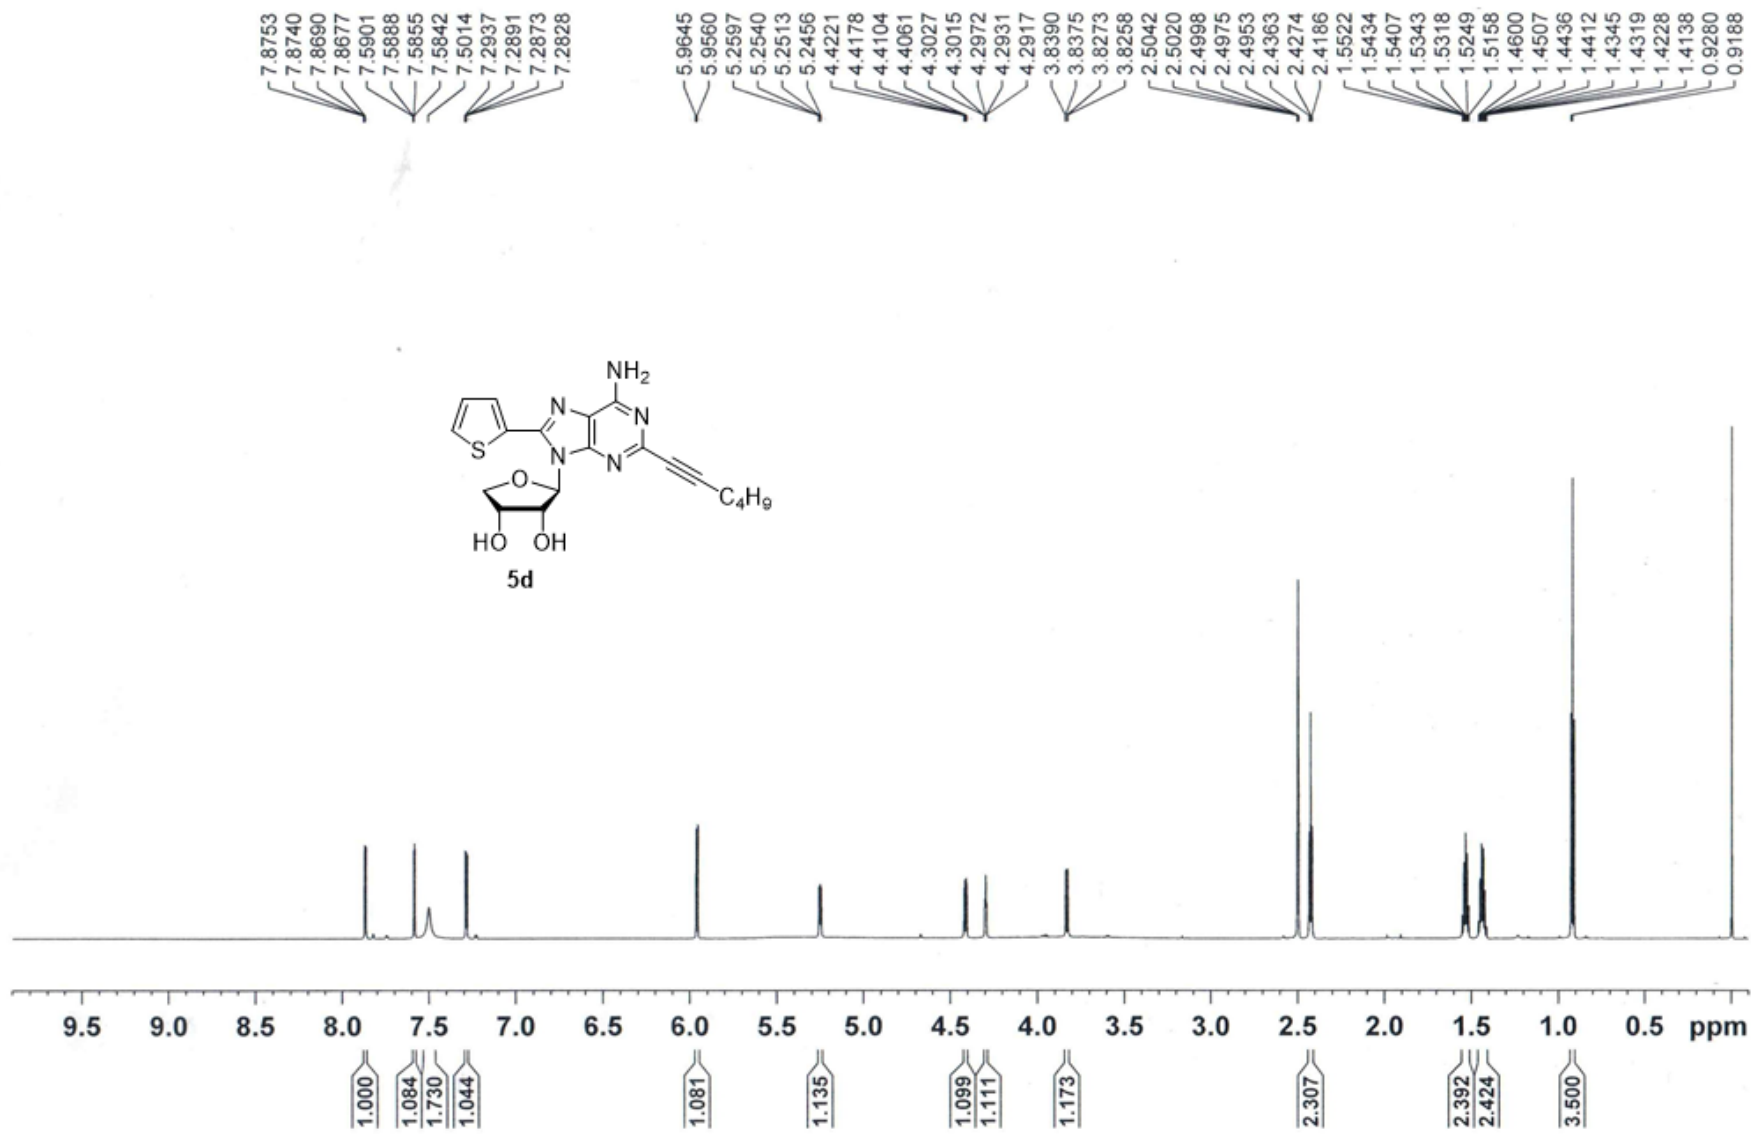

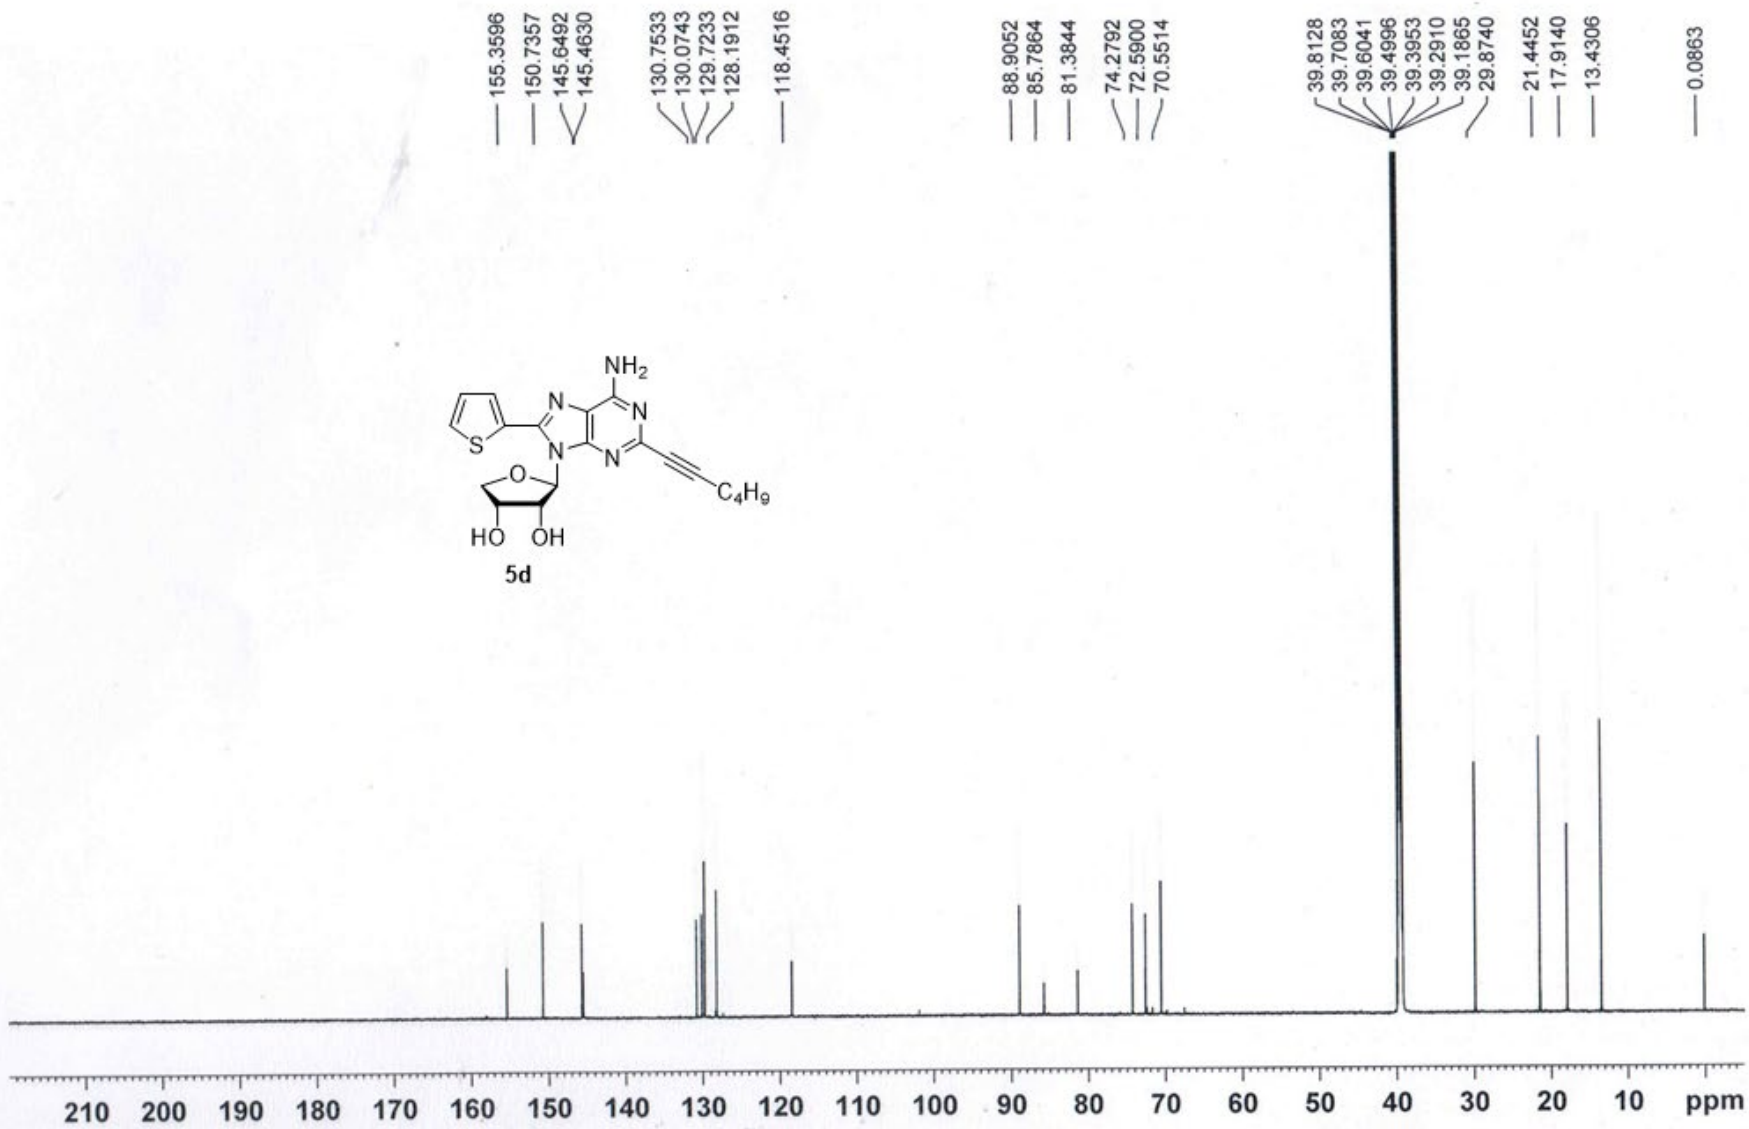

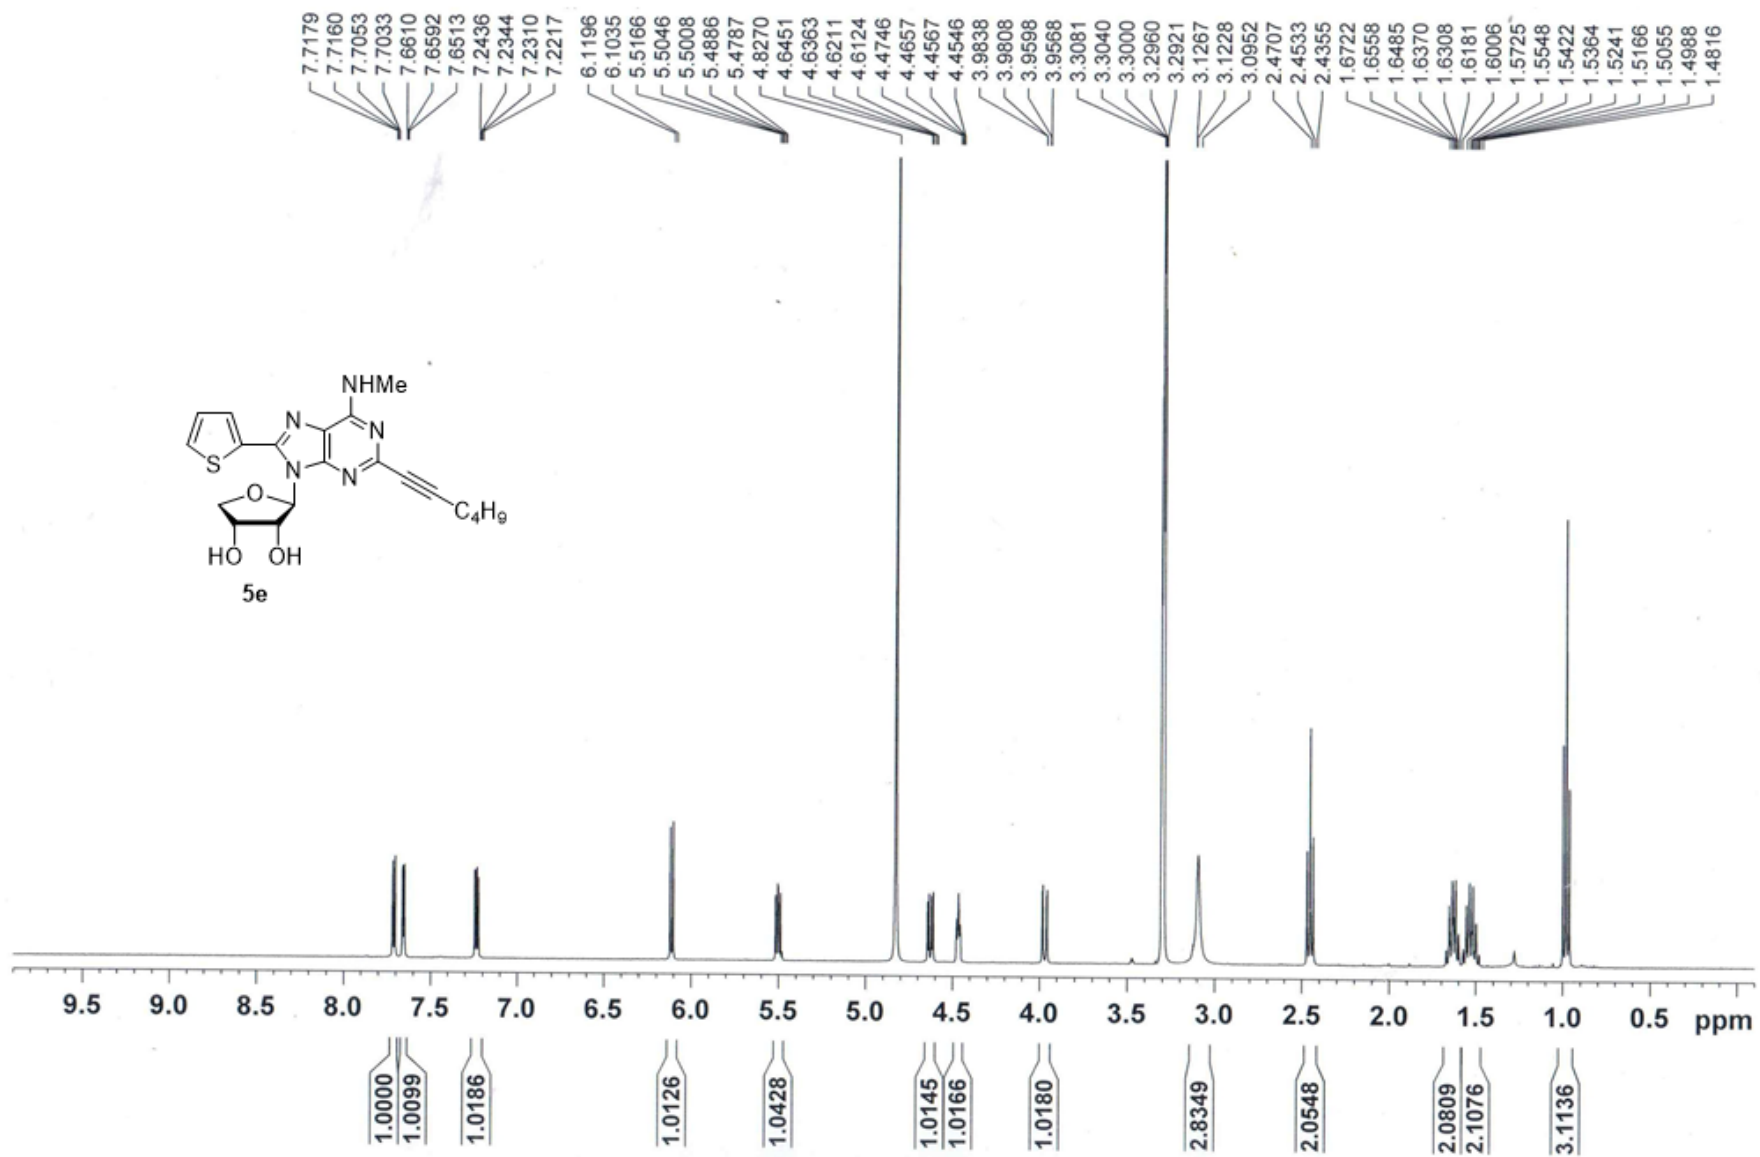

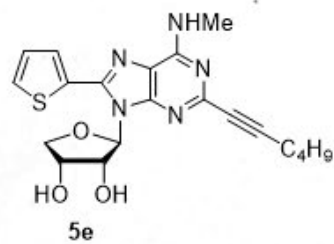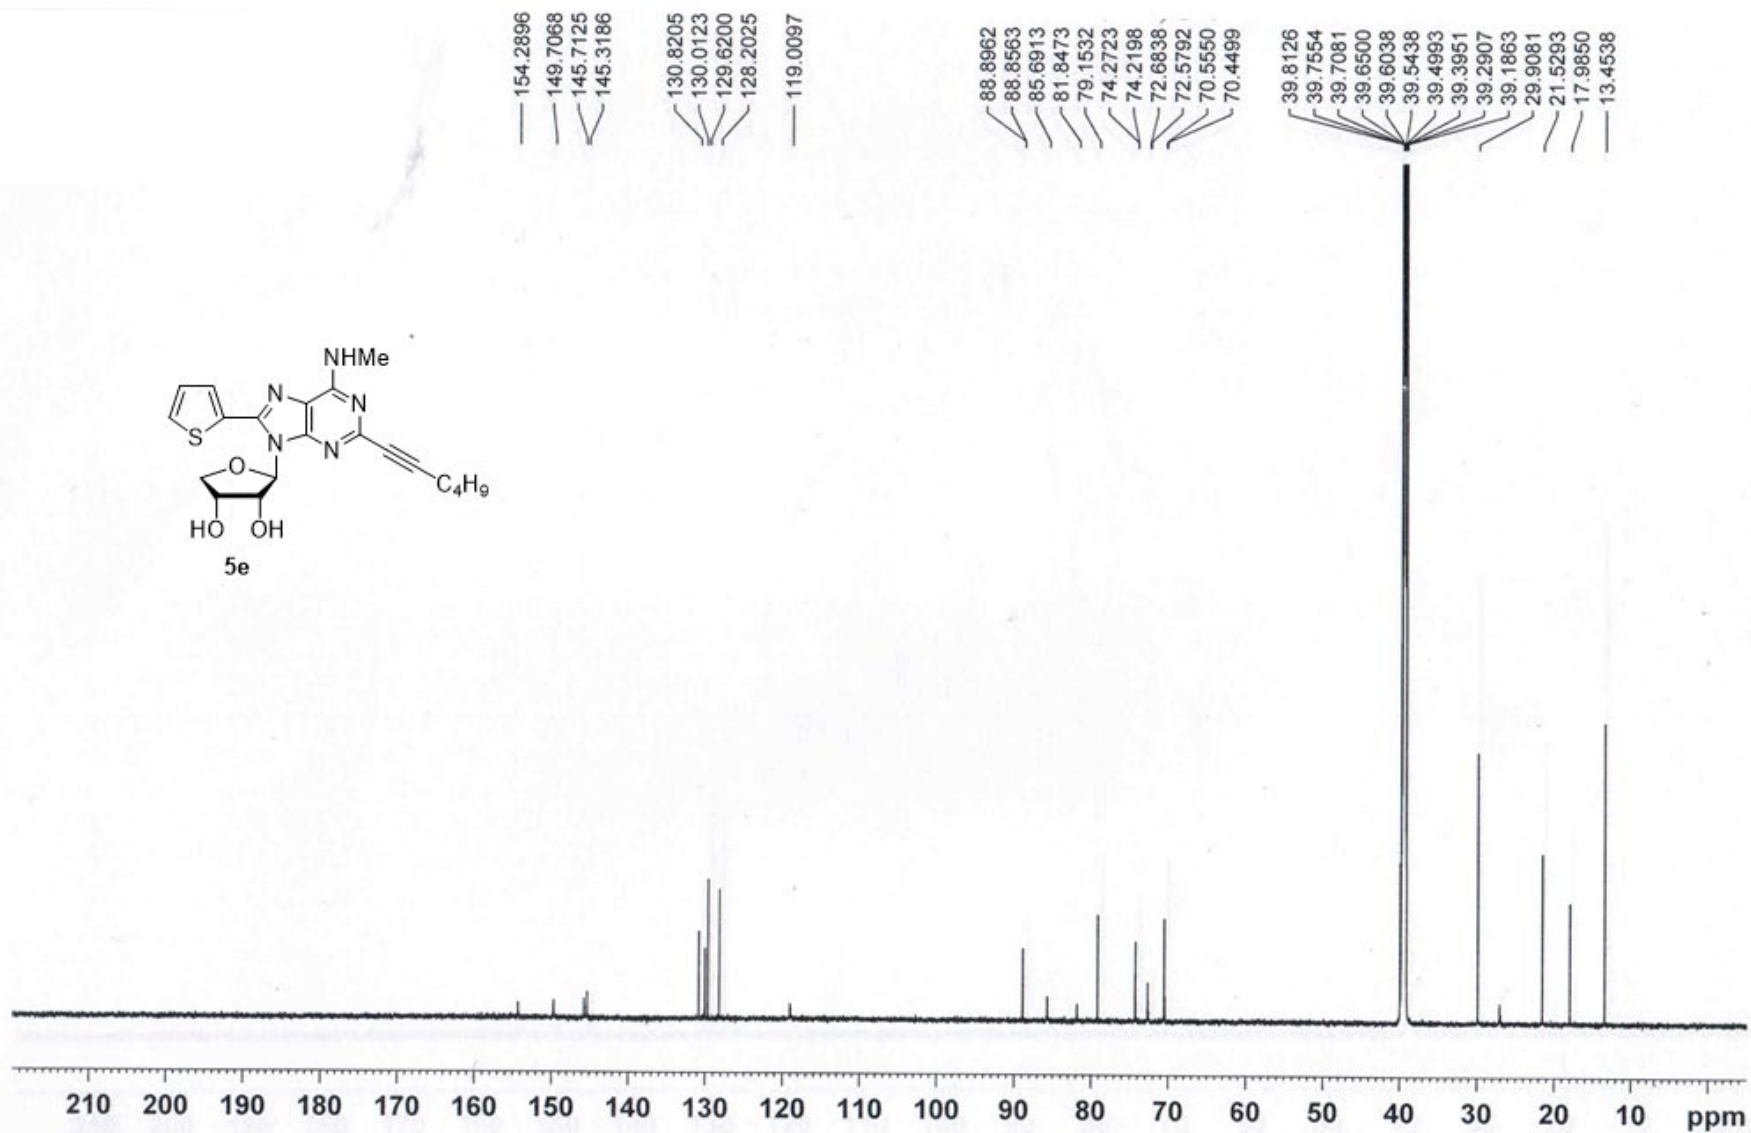

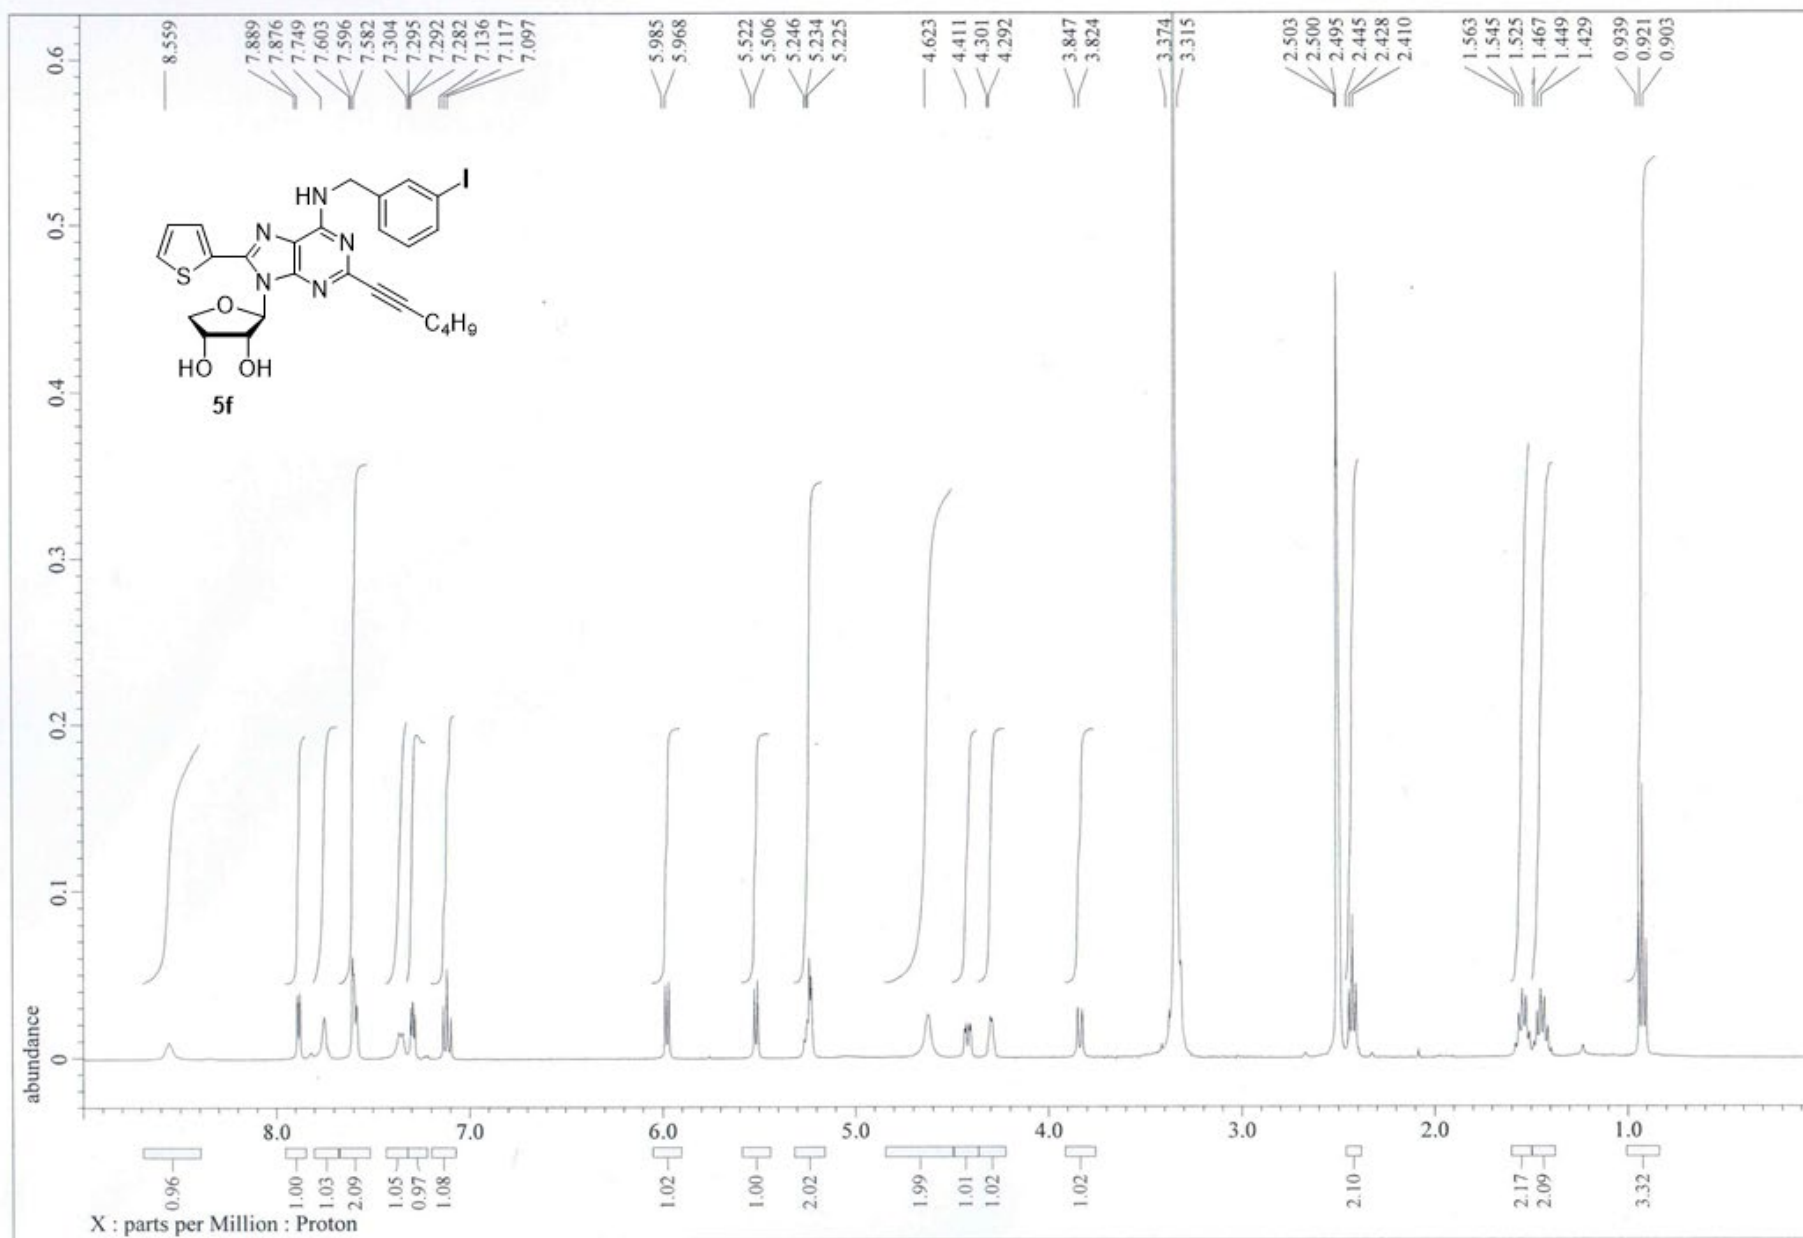

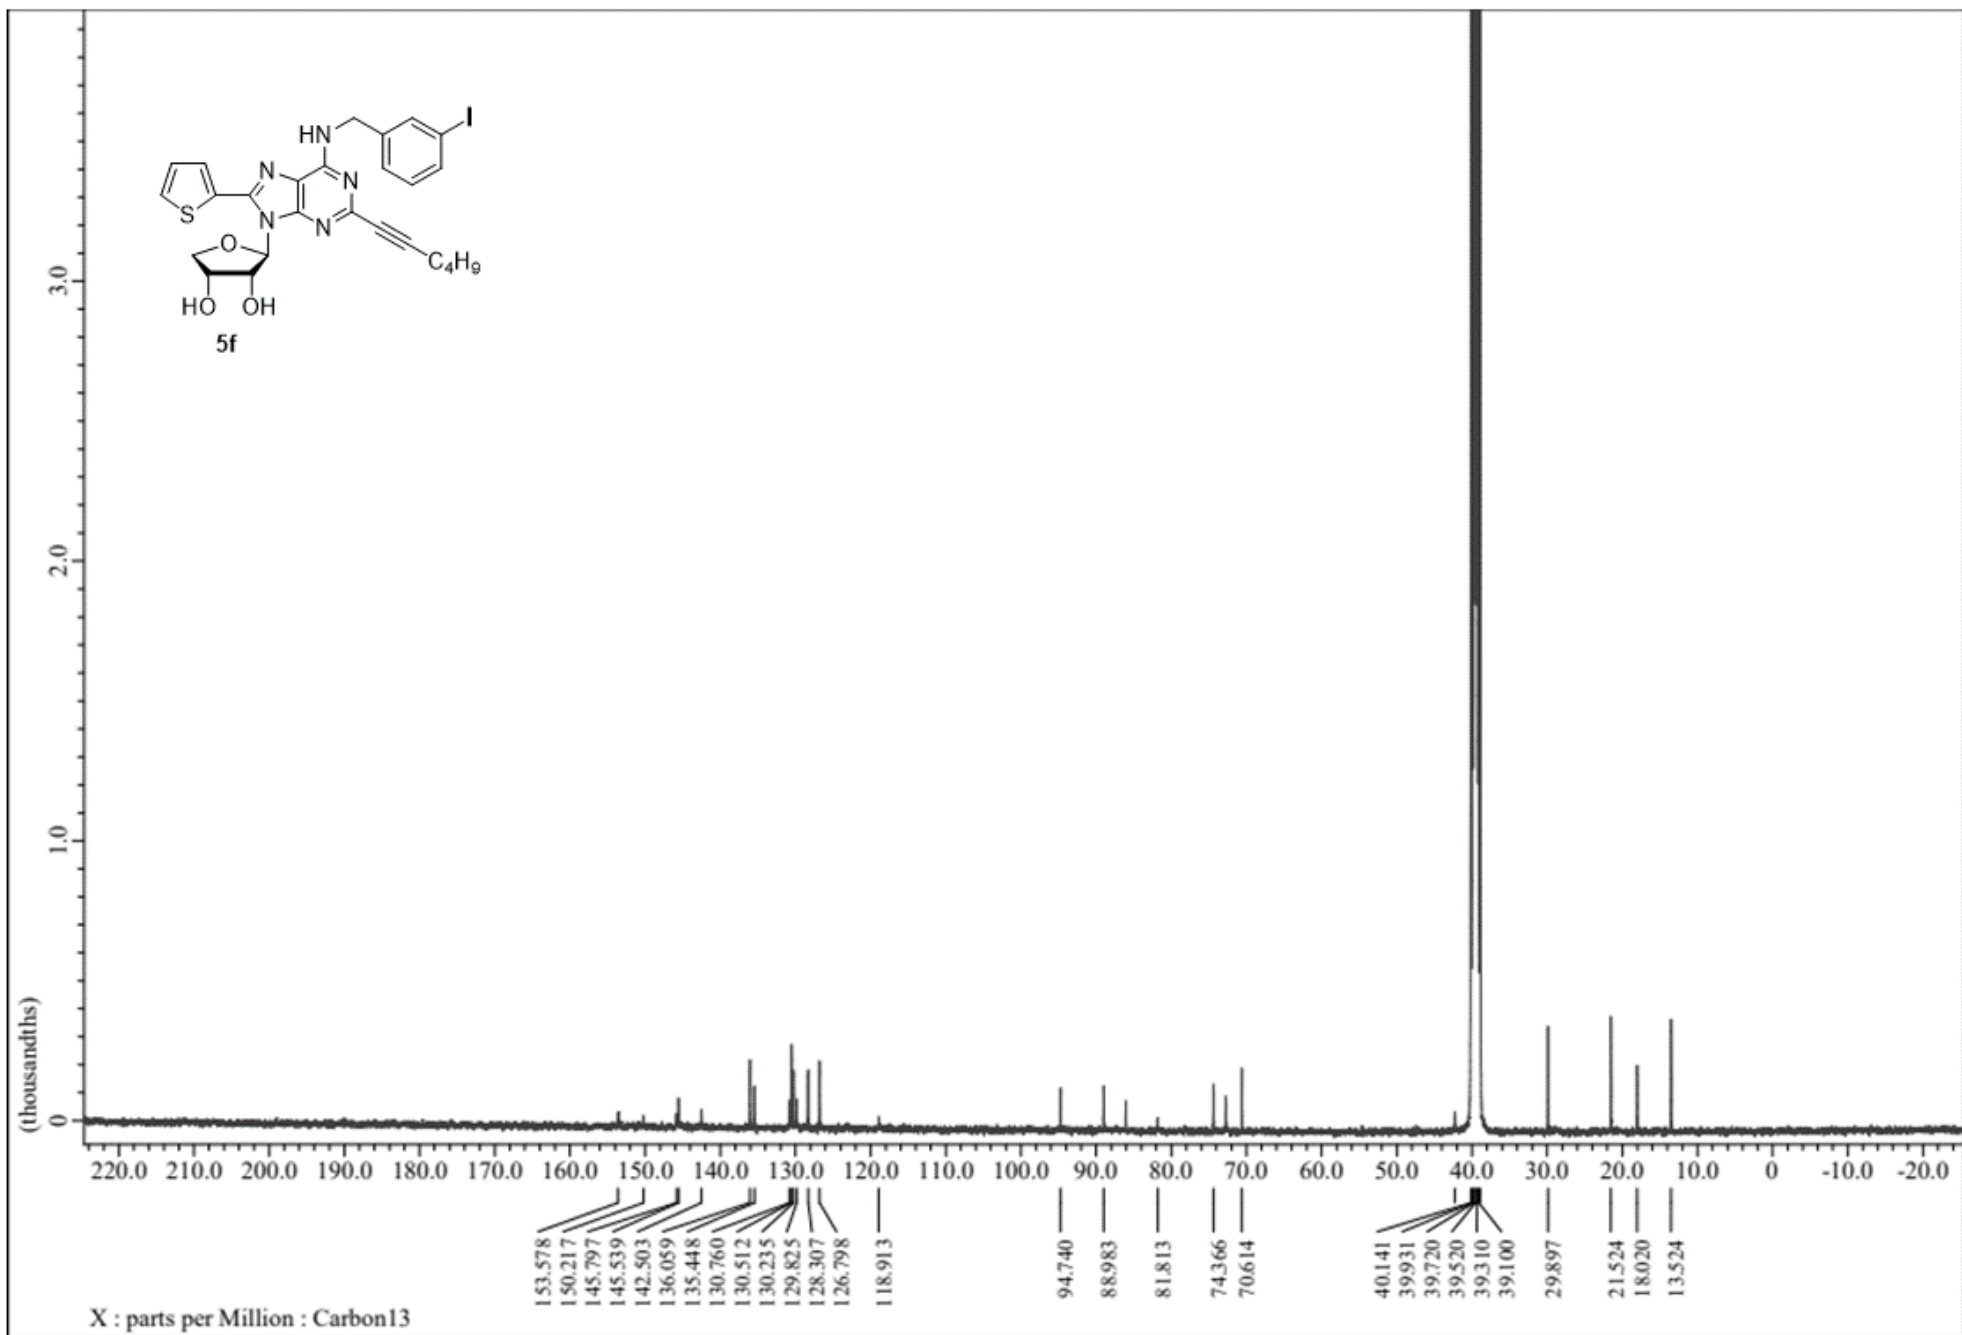



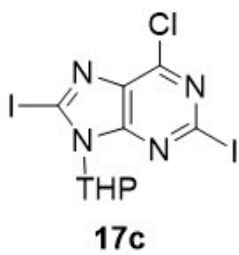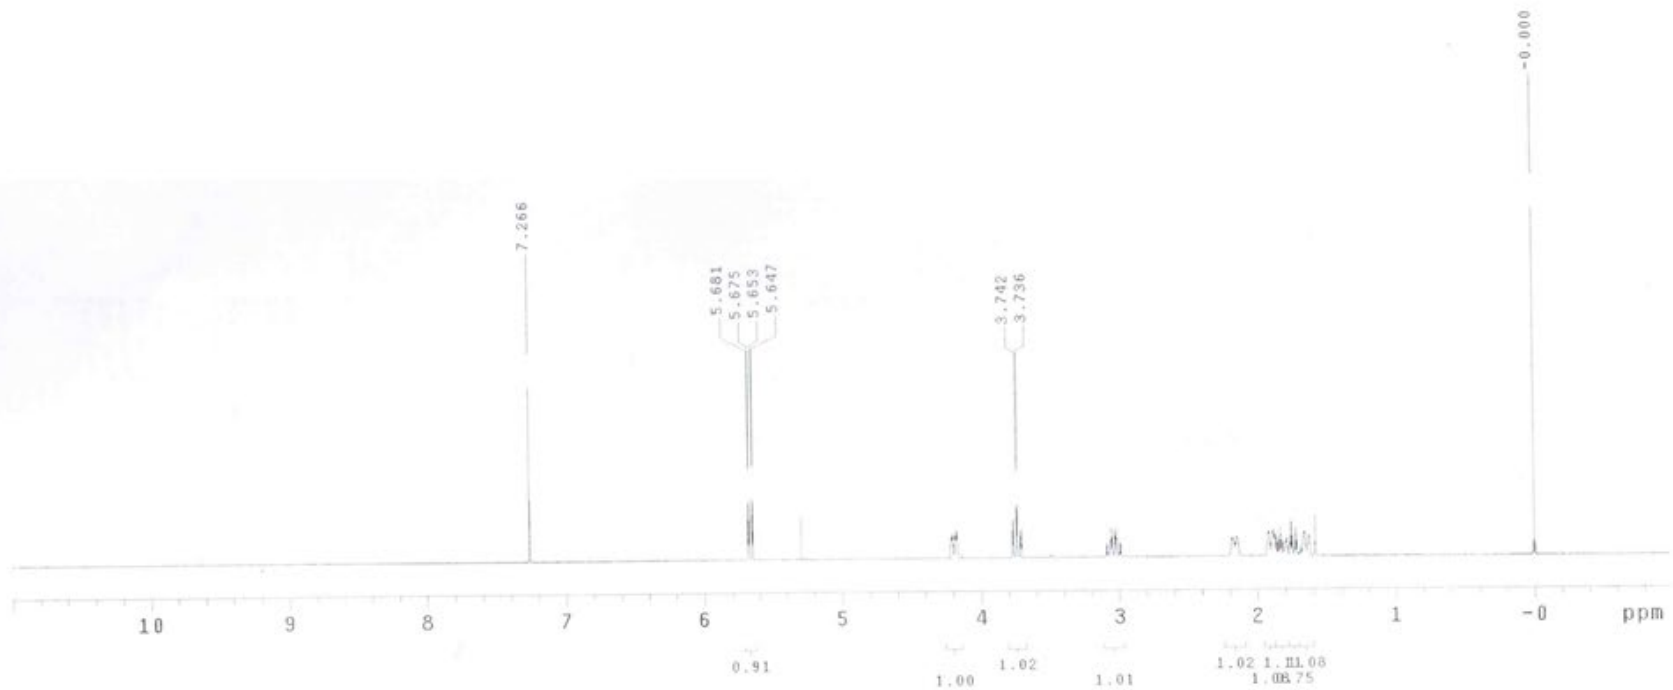

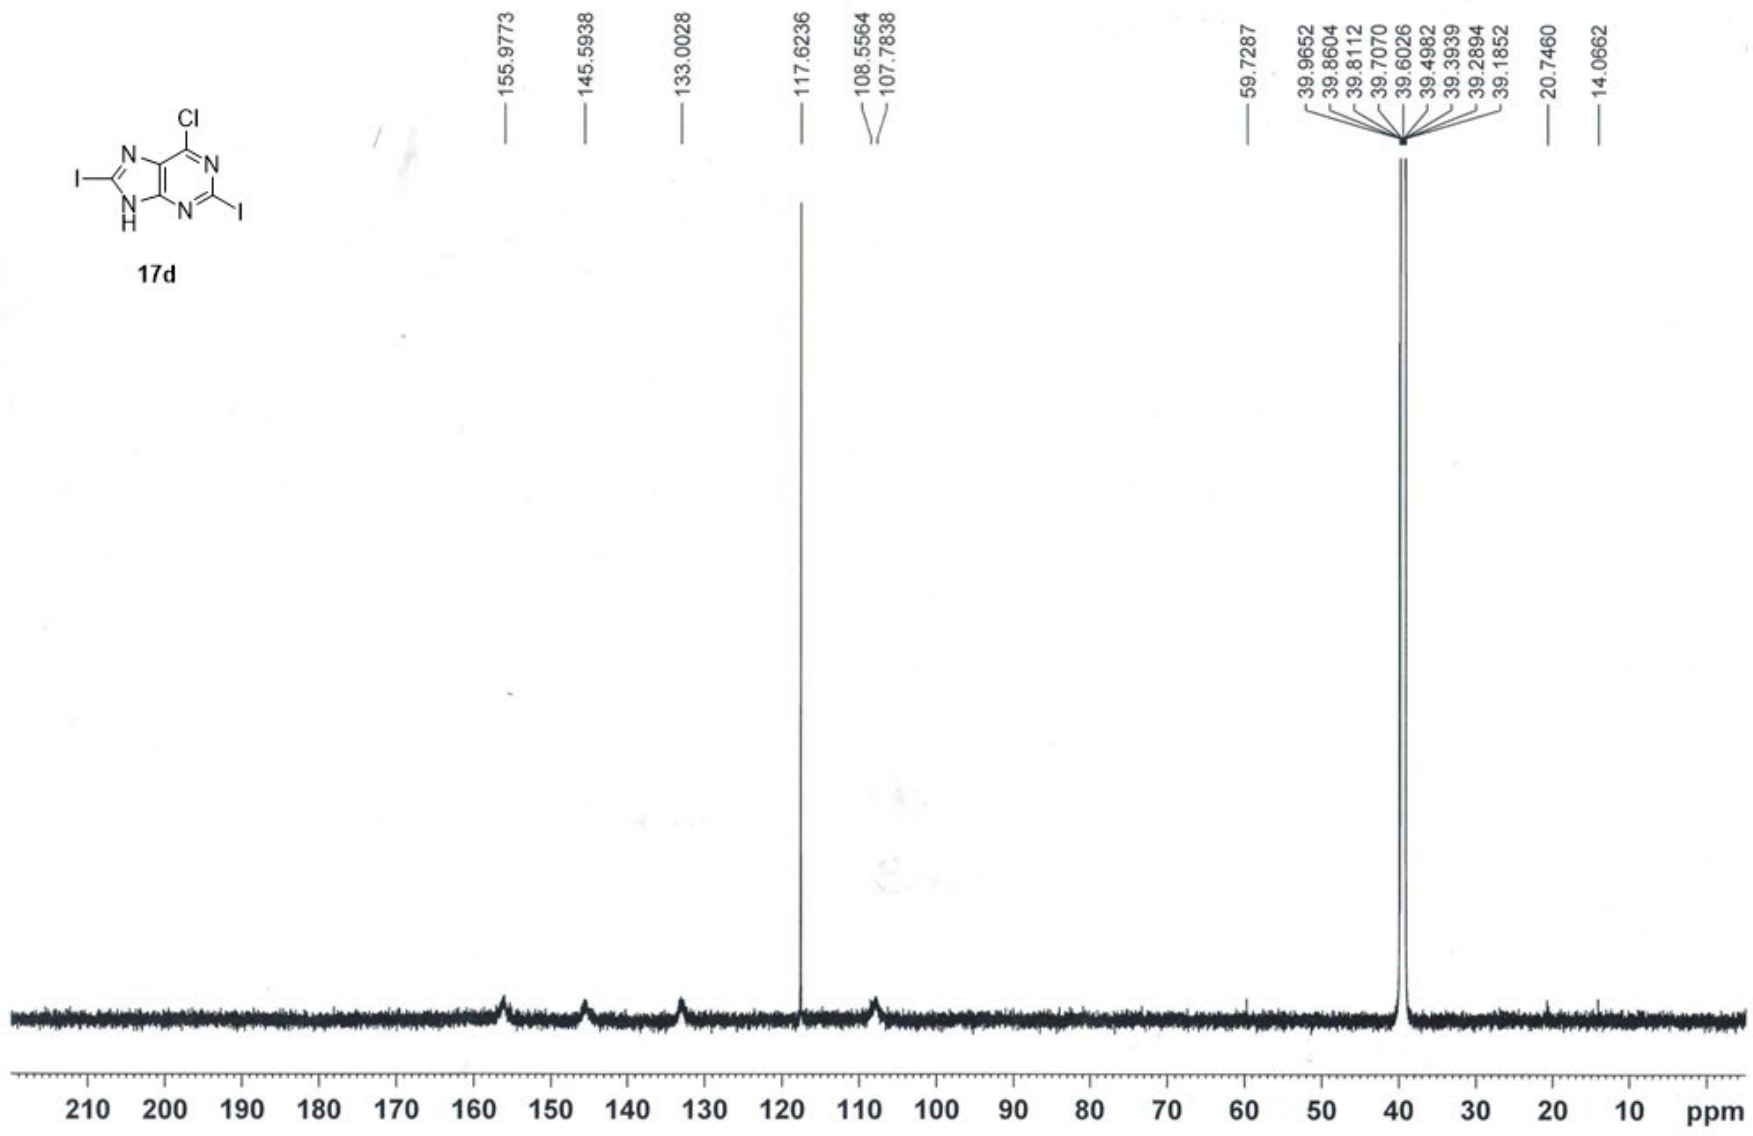

7.2399  
5.6505  
5.6473  
5.6364  
5.6332  
4.1861  
4.1832  
4.1802  
4.1715  
4.1687  
4.1657  
3.7320  
3.7292  
3.7169  
3.7143  
3.7020  
3.6990  
3.0549  
3.0496  
3.0406  
3.0386  
3.0354  
3.0334  
3.0245  
3.0225  
3.0192  
3.0173  
3.0083  
3.0030  
2.1487  
2.1469  
2.1408  
2.1367  
2.1317  
2.1287  
2.0201  
1.8918  
1.8886  
1.8755  
1.8723  
1.8532  
1.8478  
1.8425  
1.8366  
1.8316  
1.8258  
1.8207  
1.8152  
1.8098  
1.8048  
1.7991  
1.7488  
1.7442  
1.7394  
1.7328  
1.7278  
1.7230  
1.7158  
1.7111  
1.7068  
1.6998  
1.6948  
1.6898  
1.6338  
1.6318  
1.6168  
1.6148  
1.5588  
1.2431  
1.2348  
1.2258

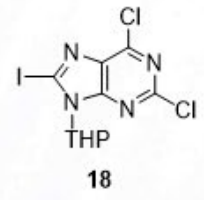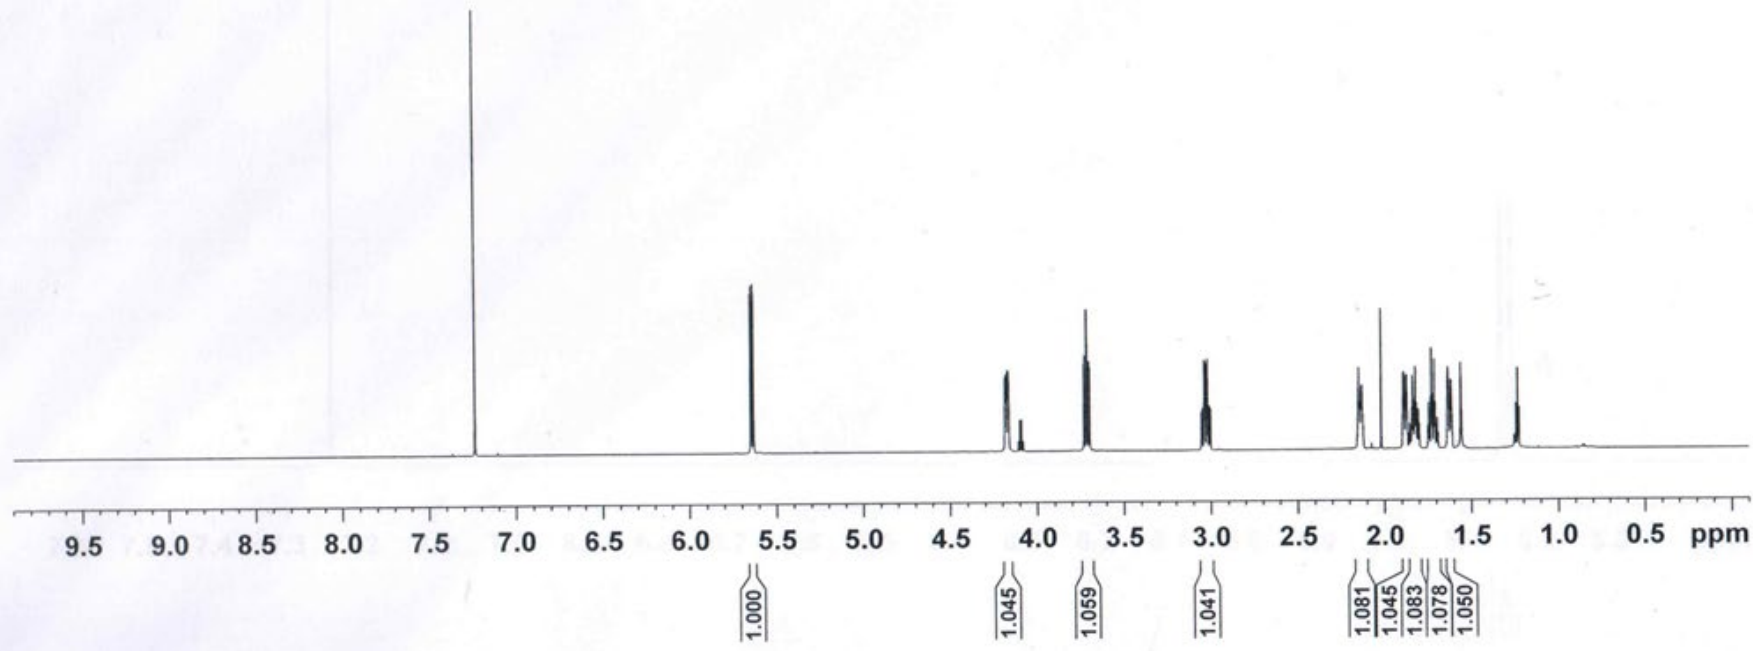

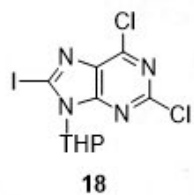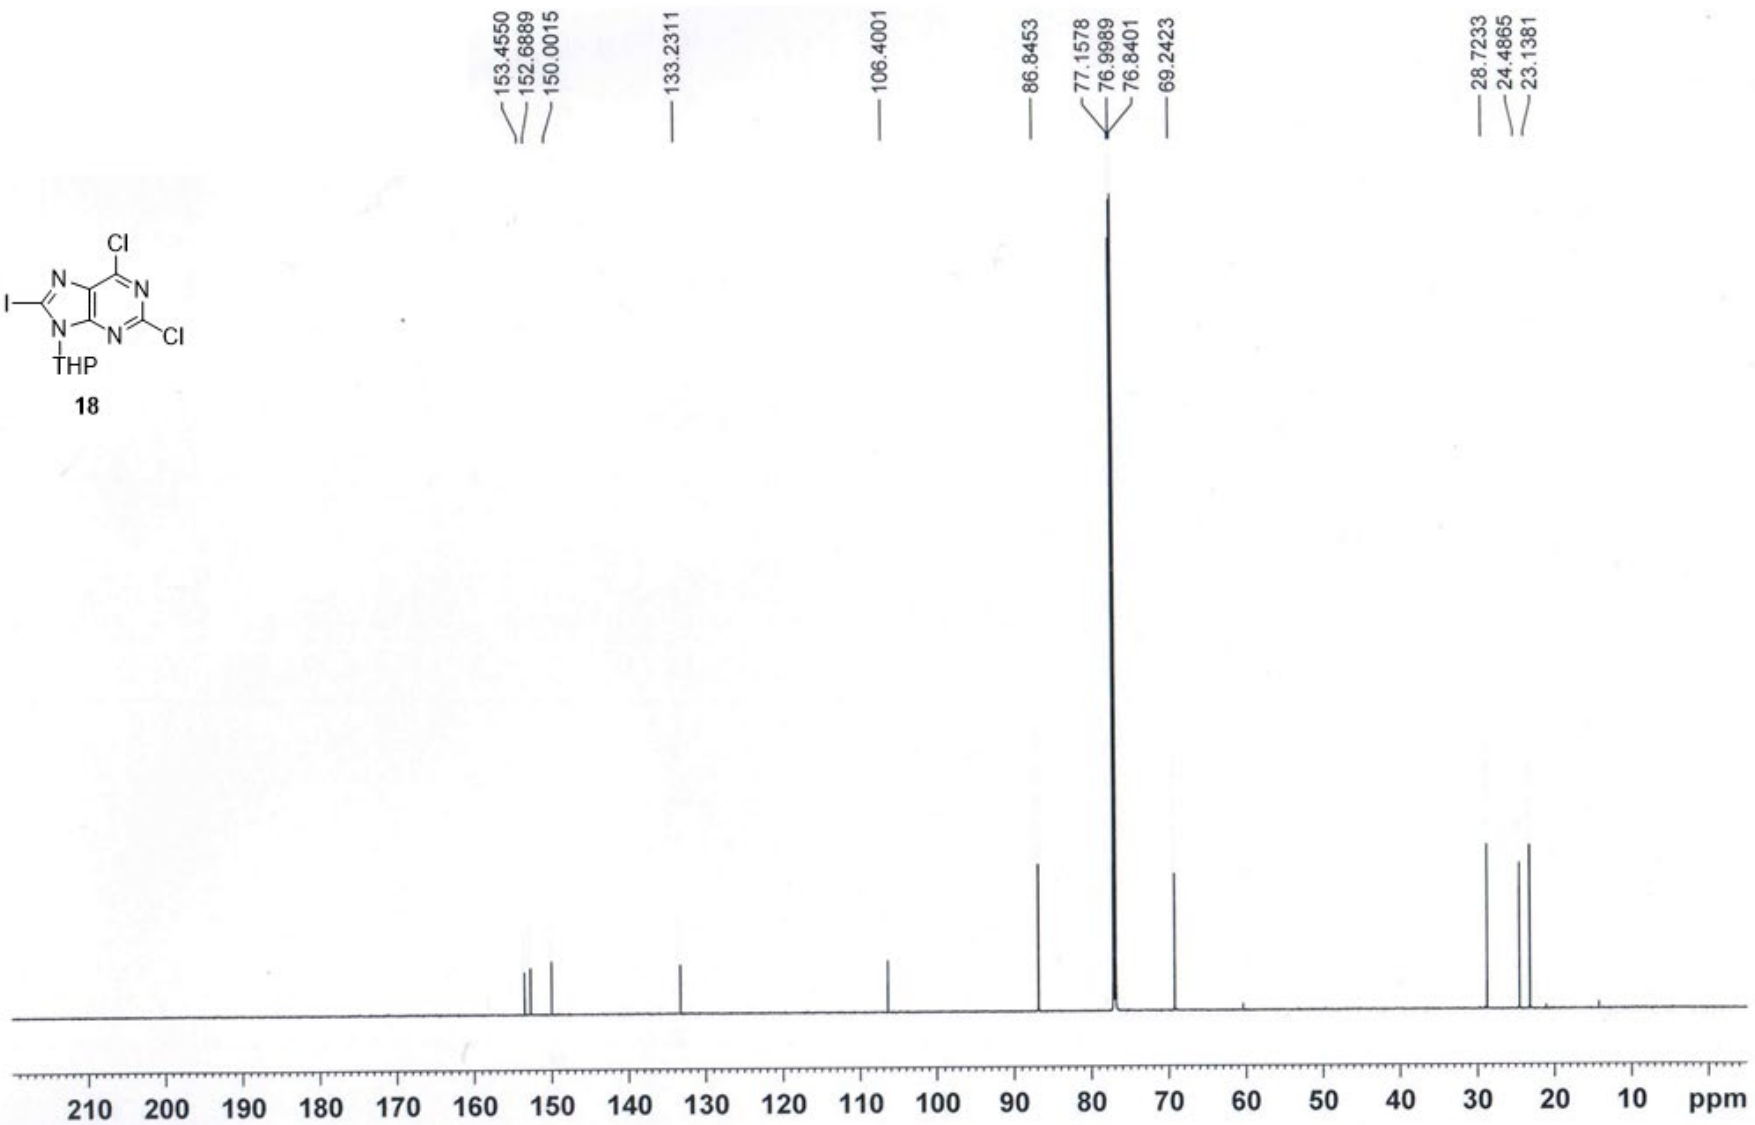

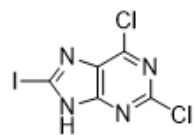

19

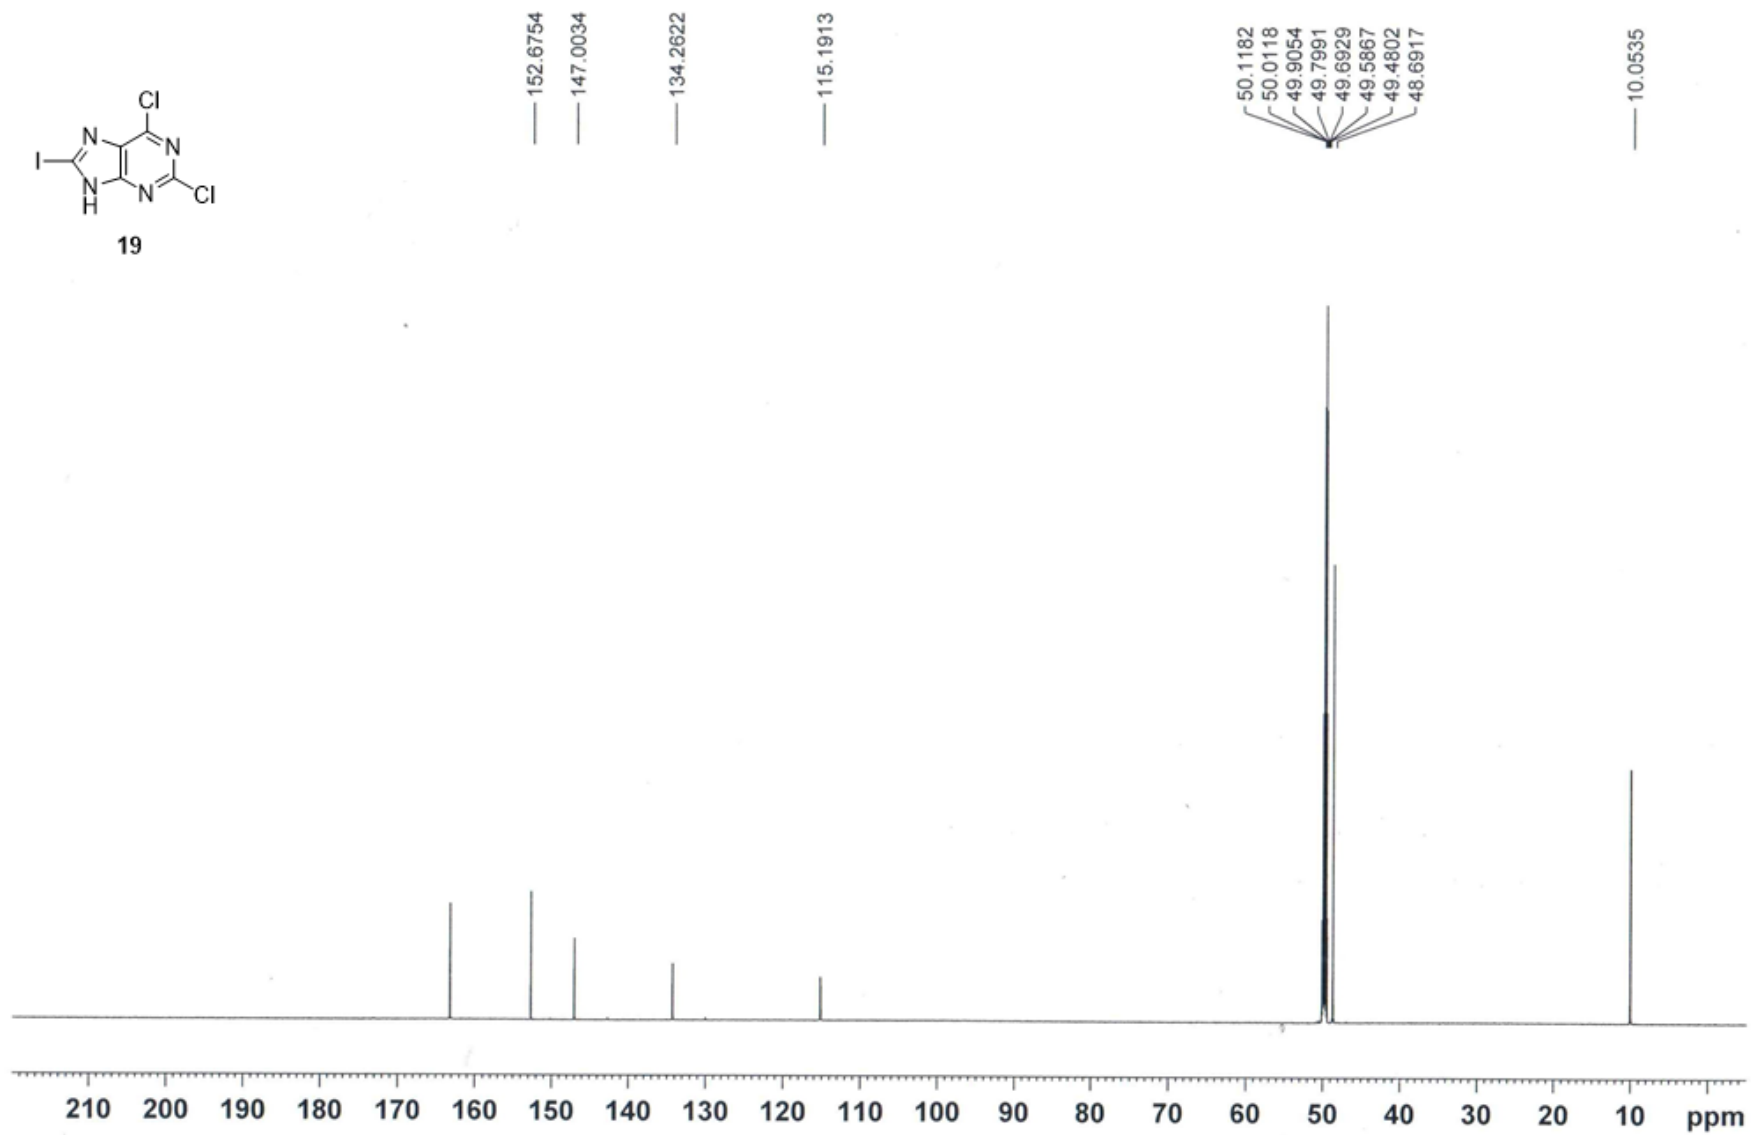

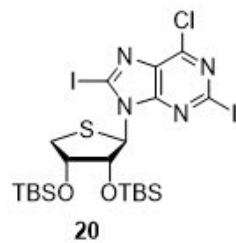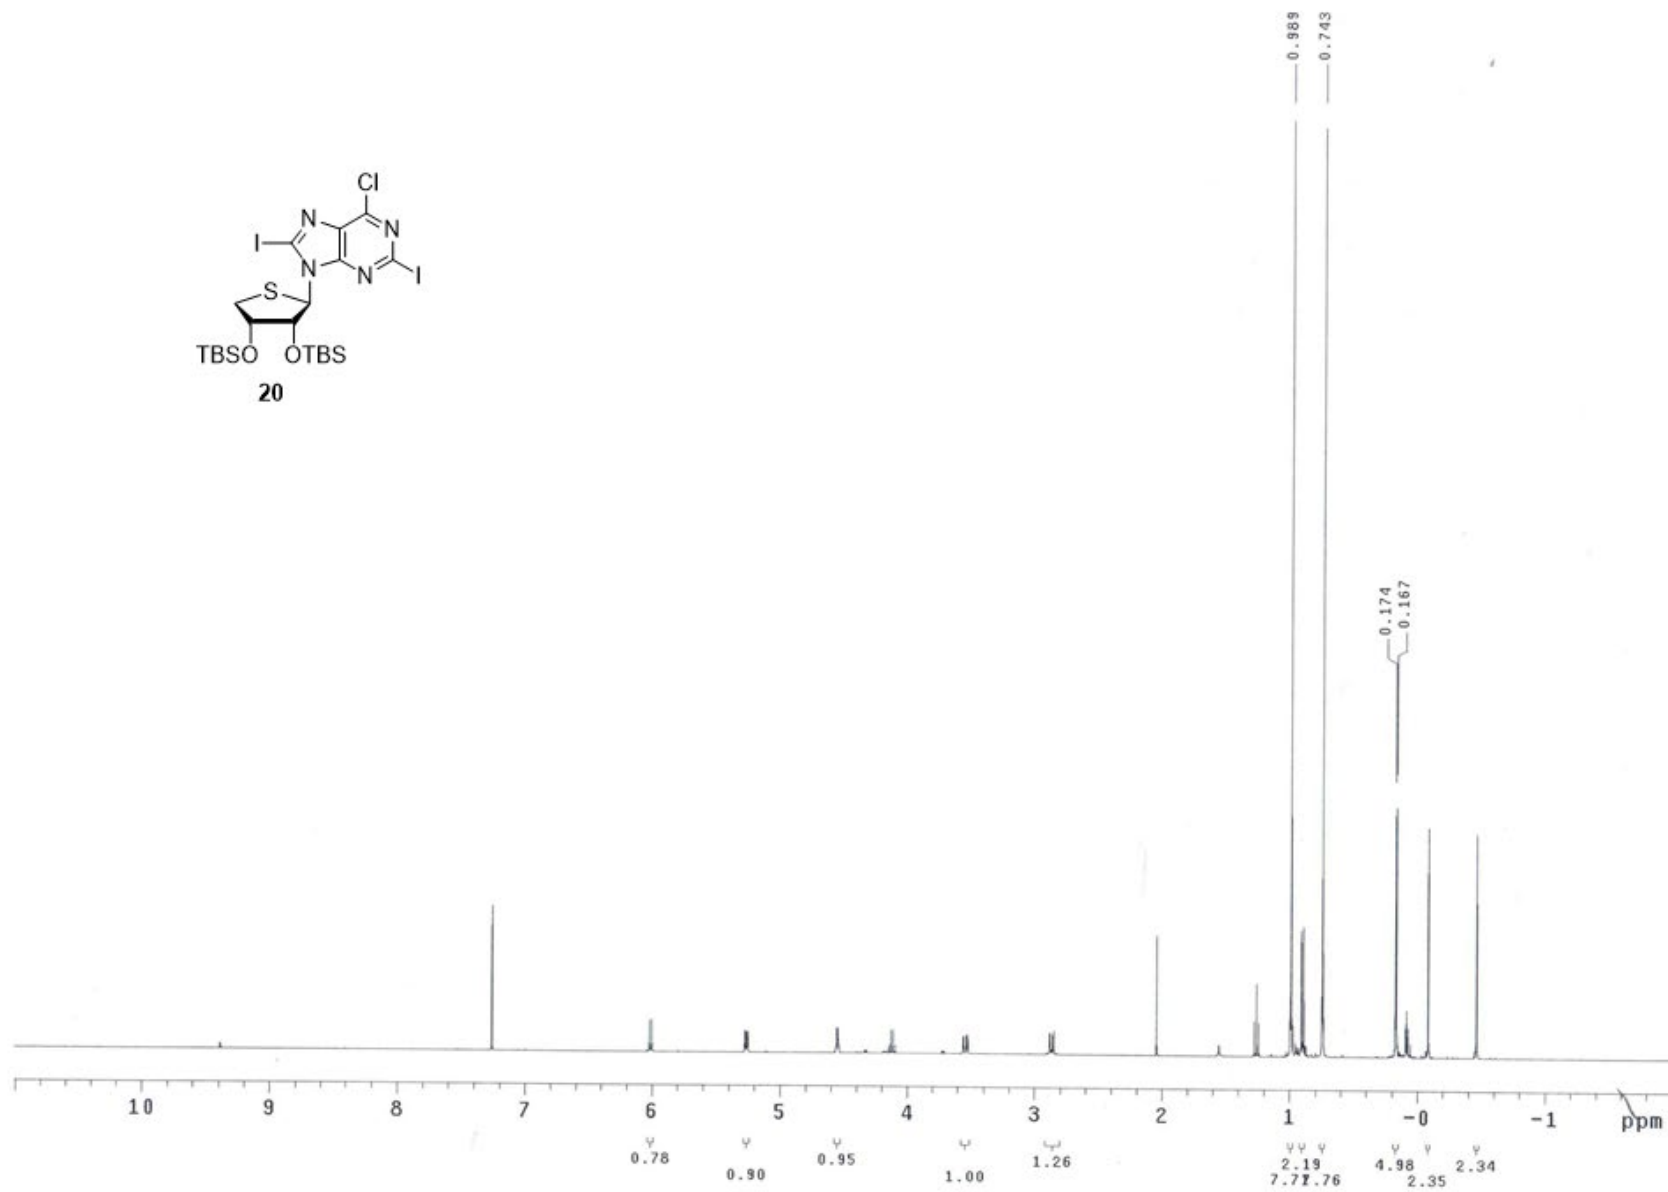

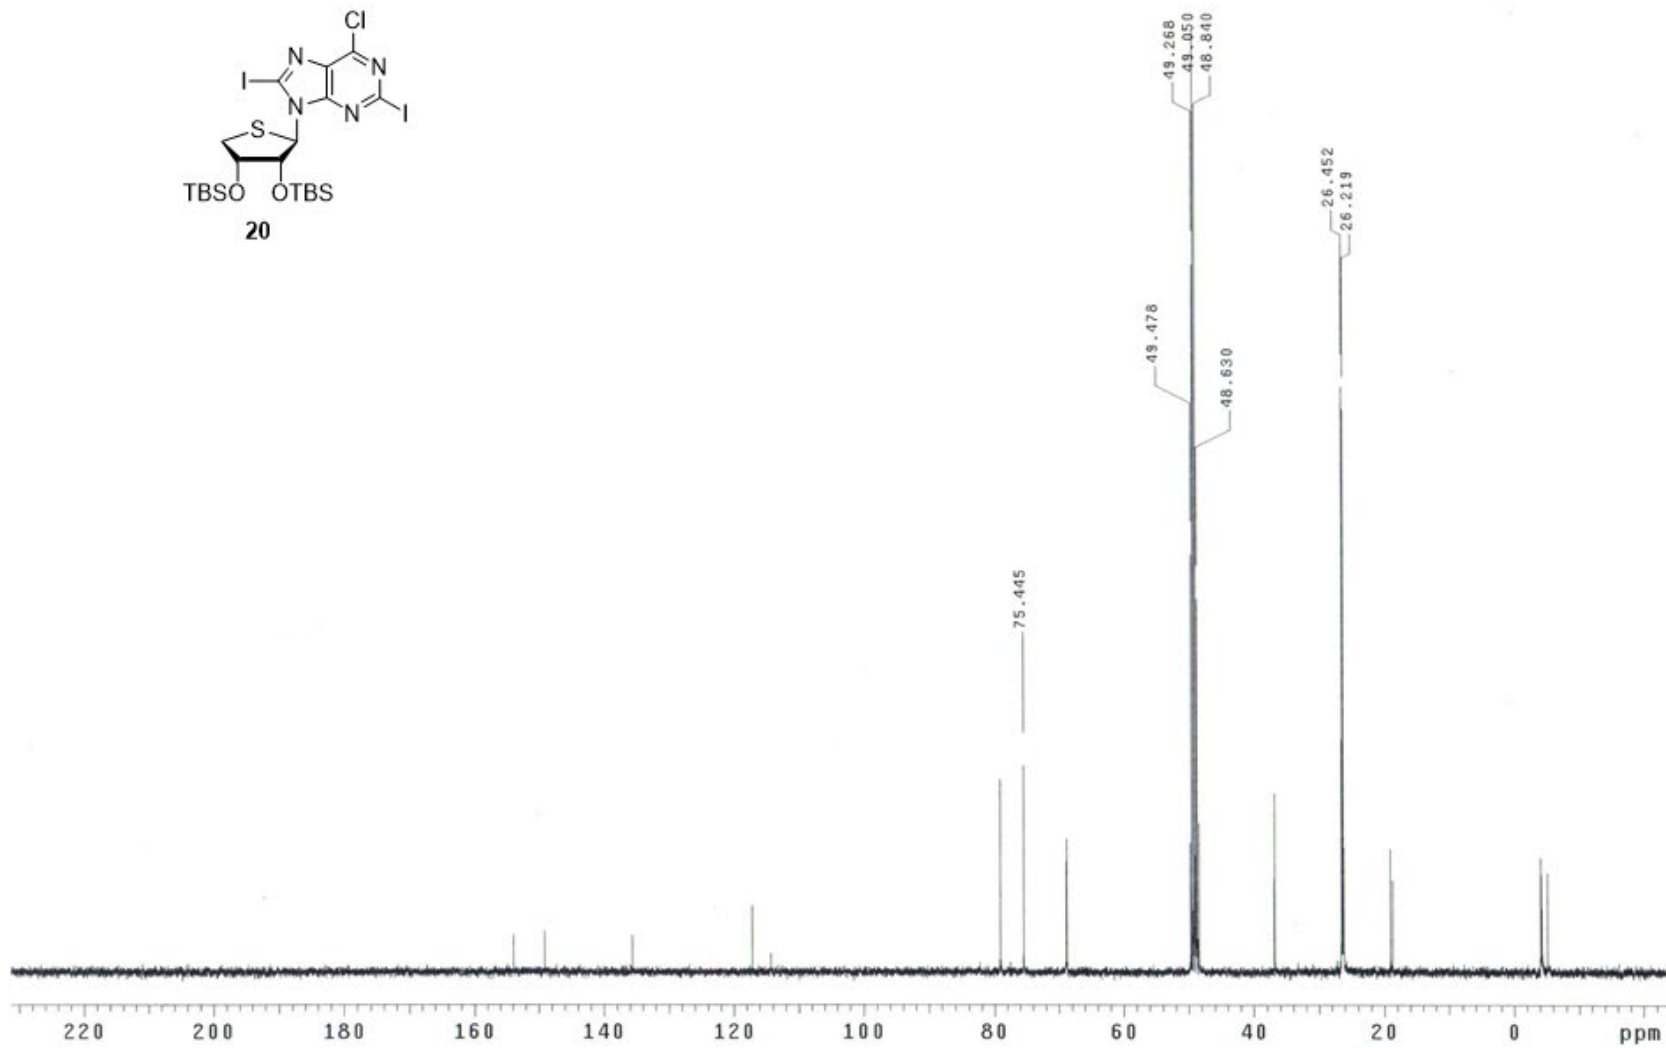

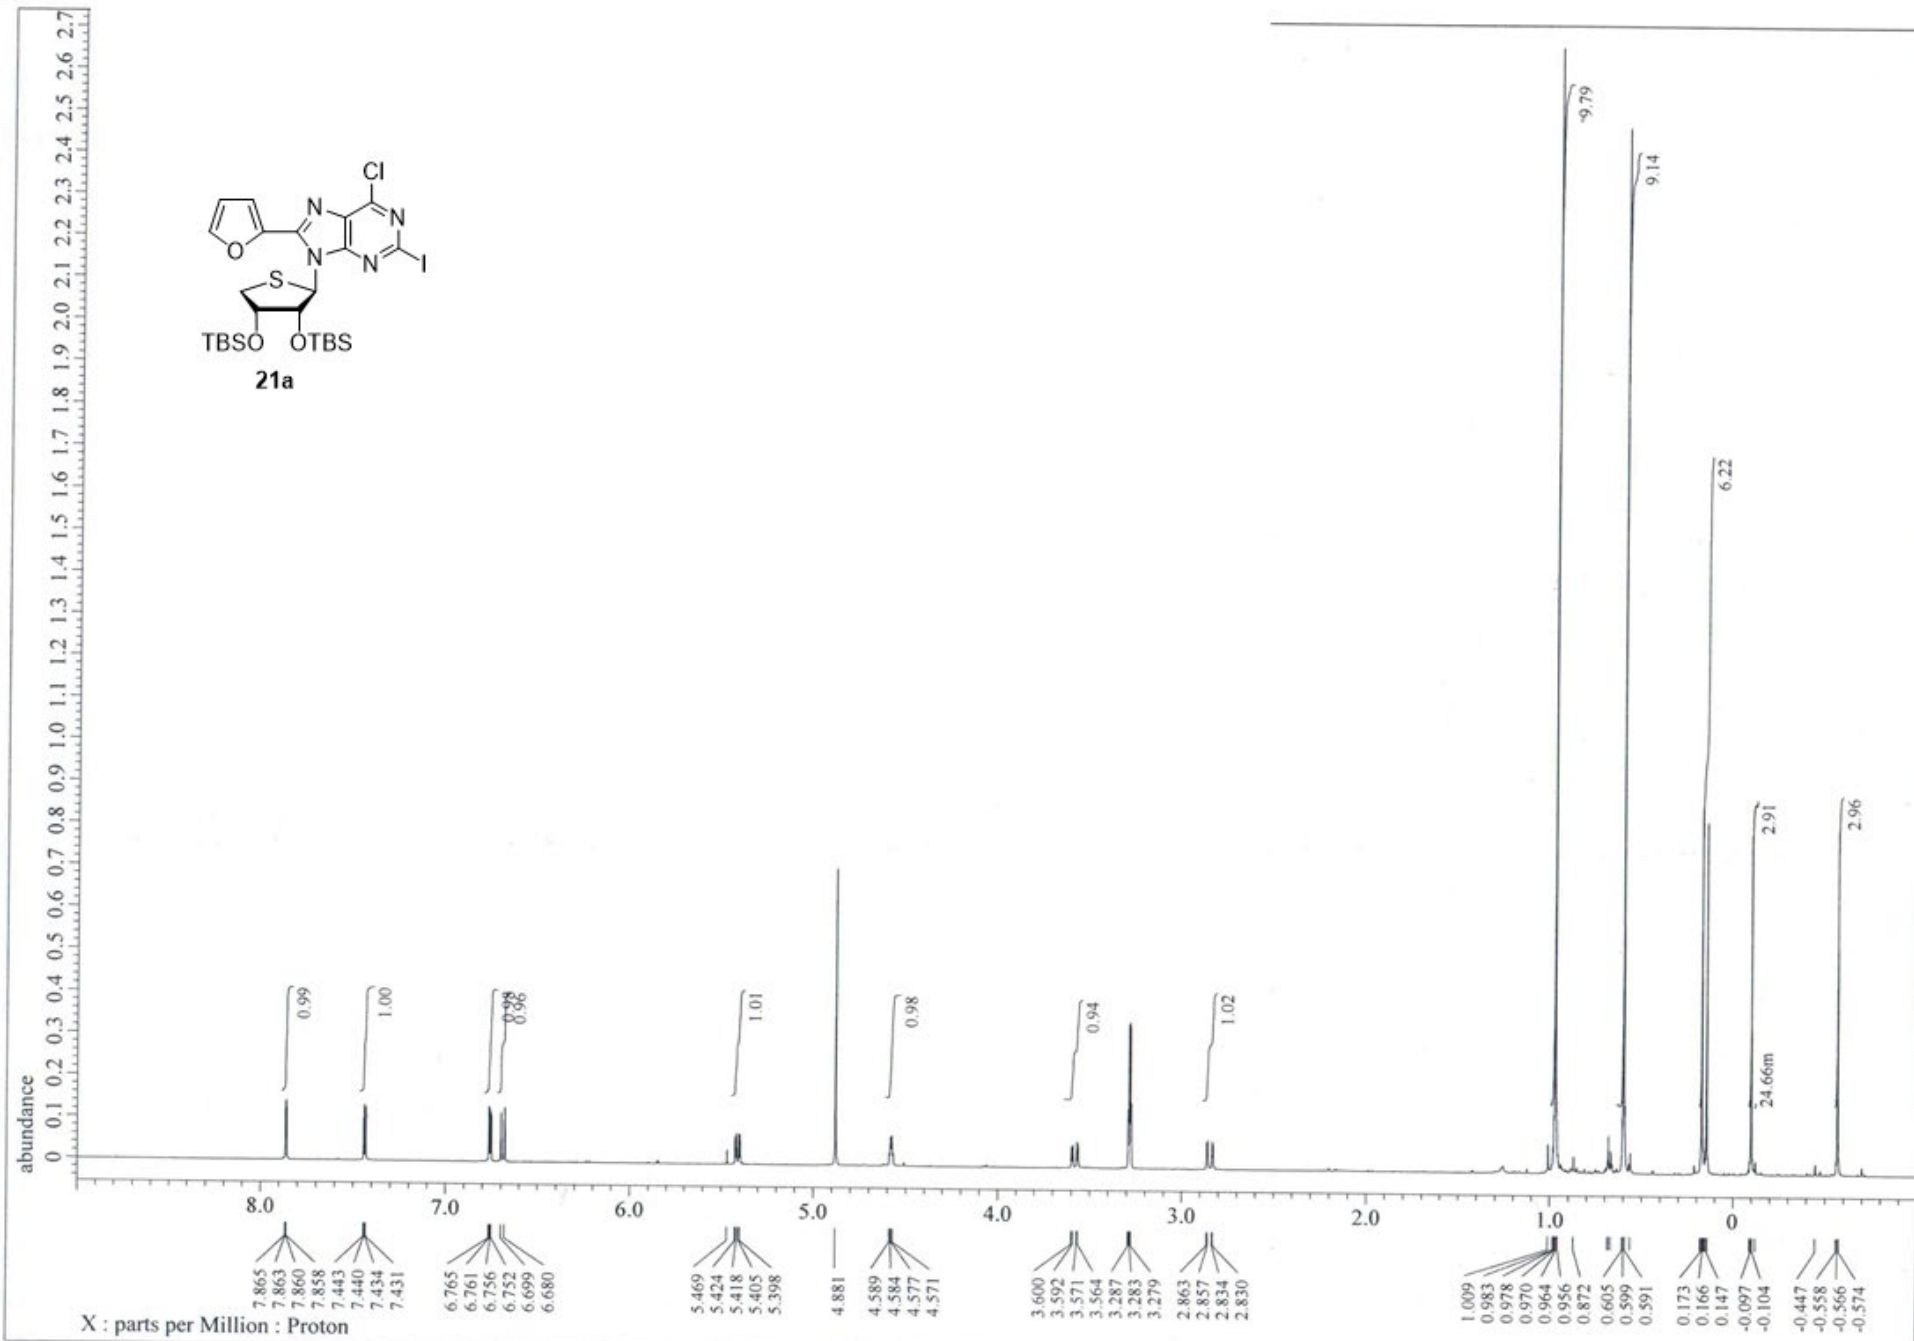



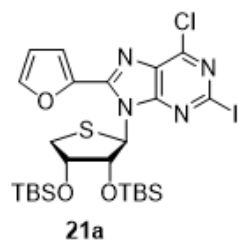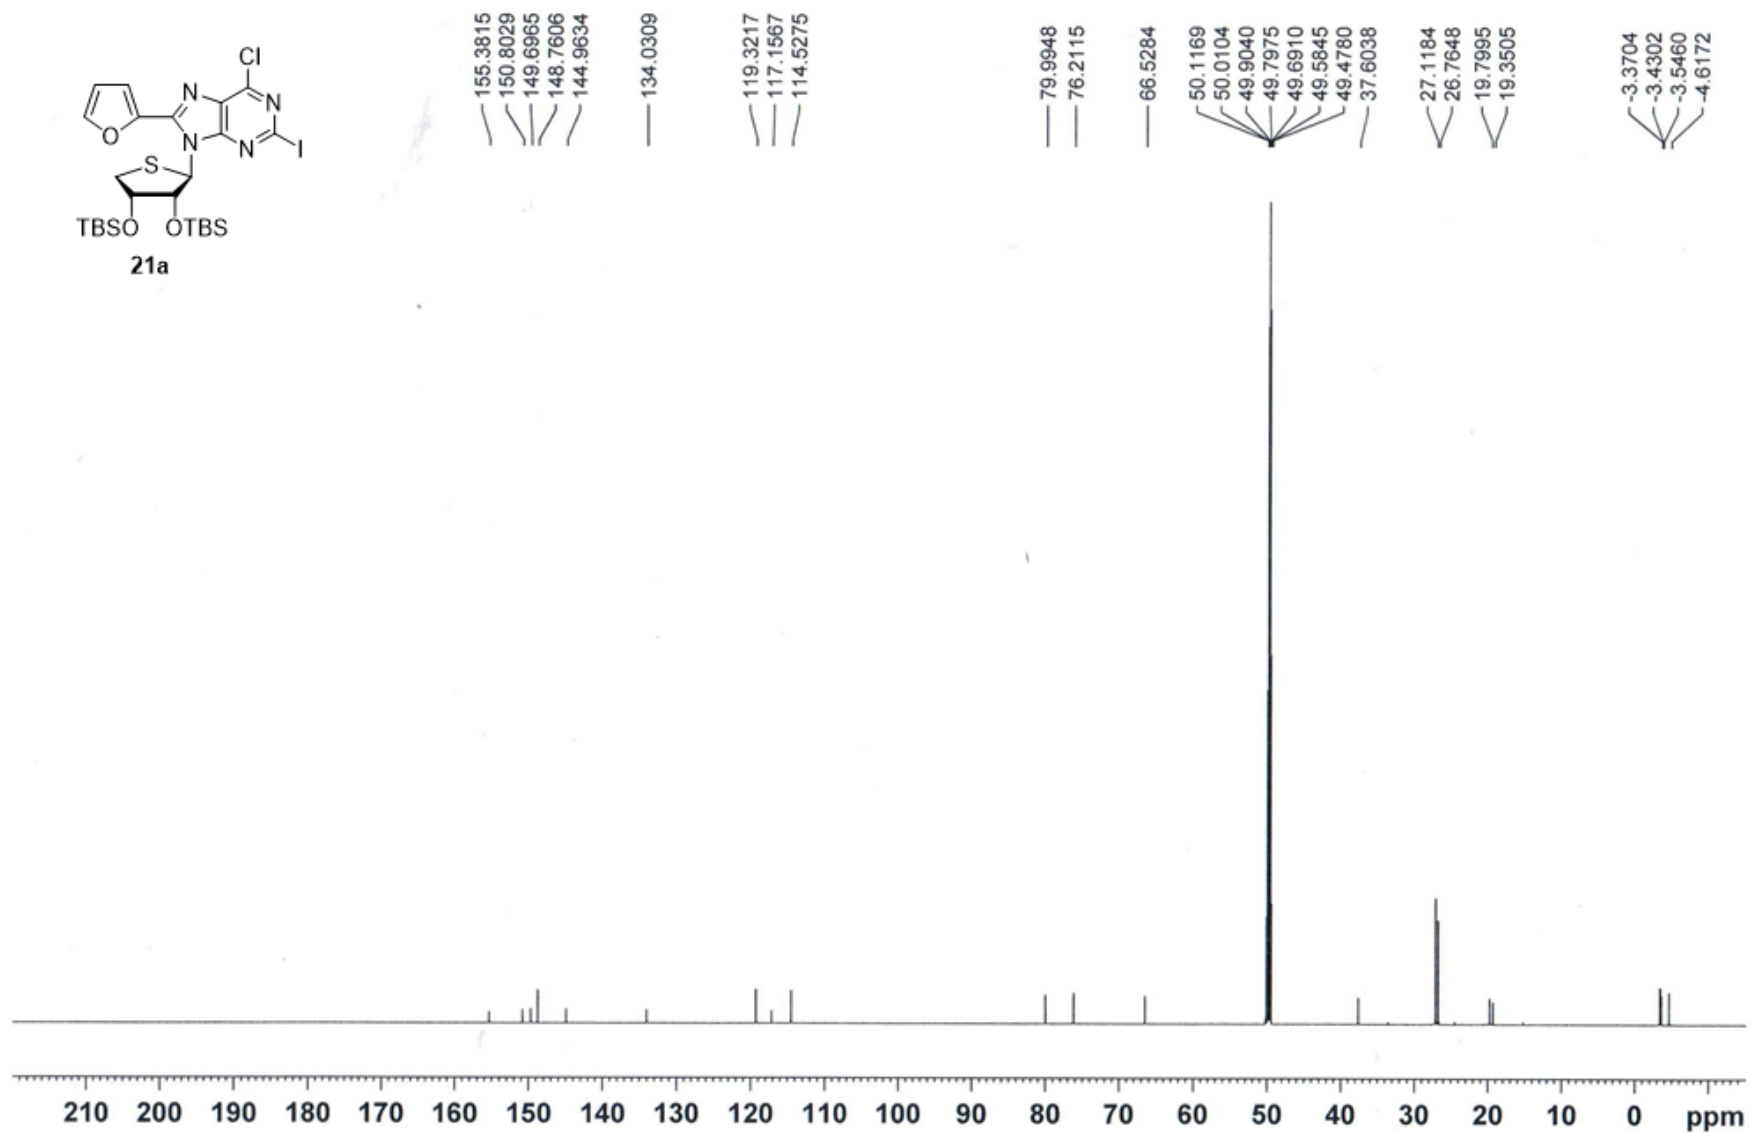

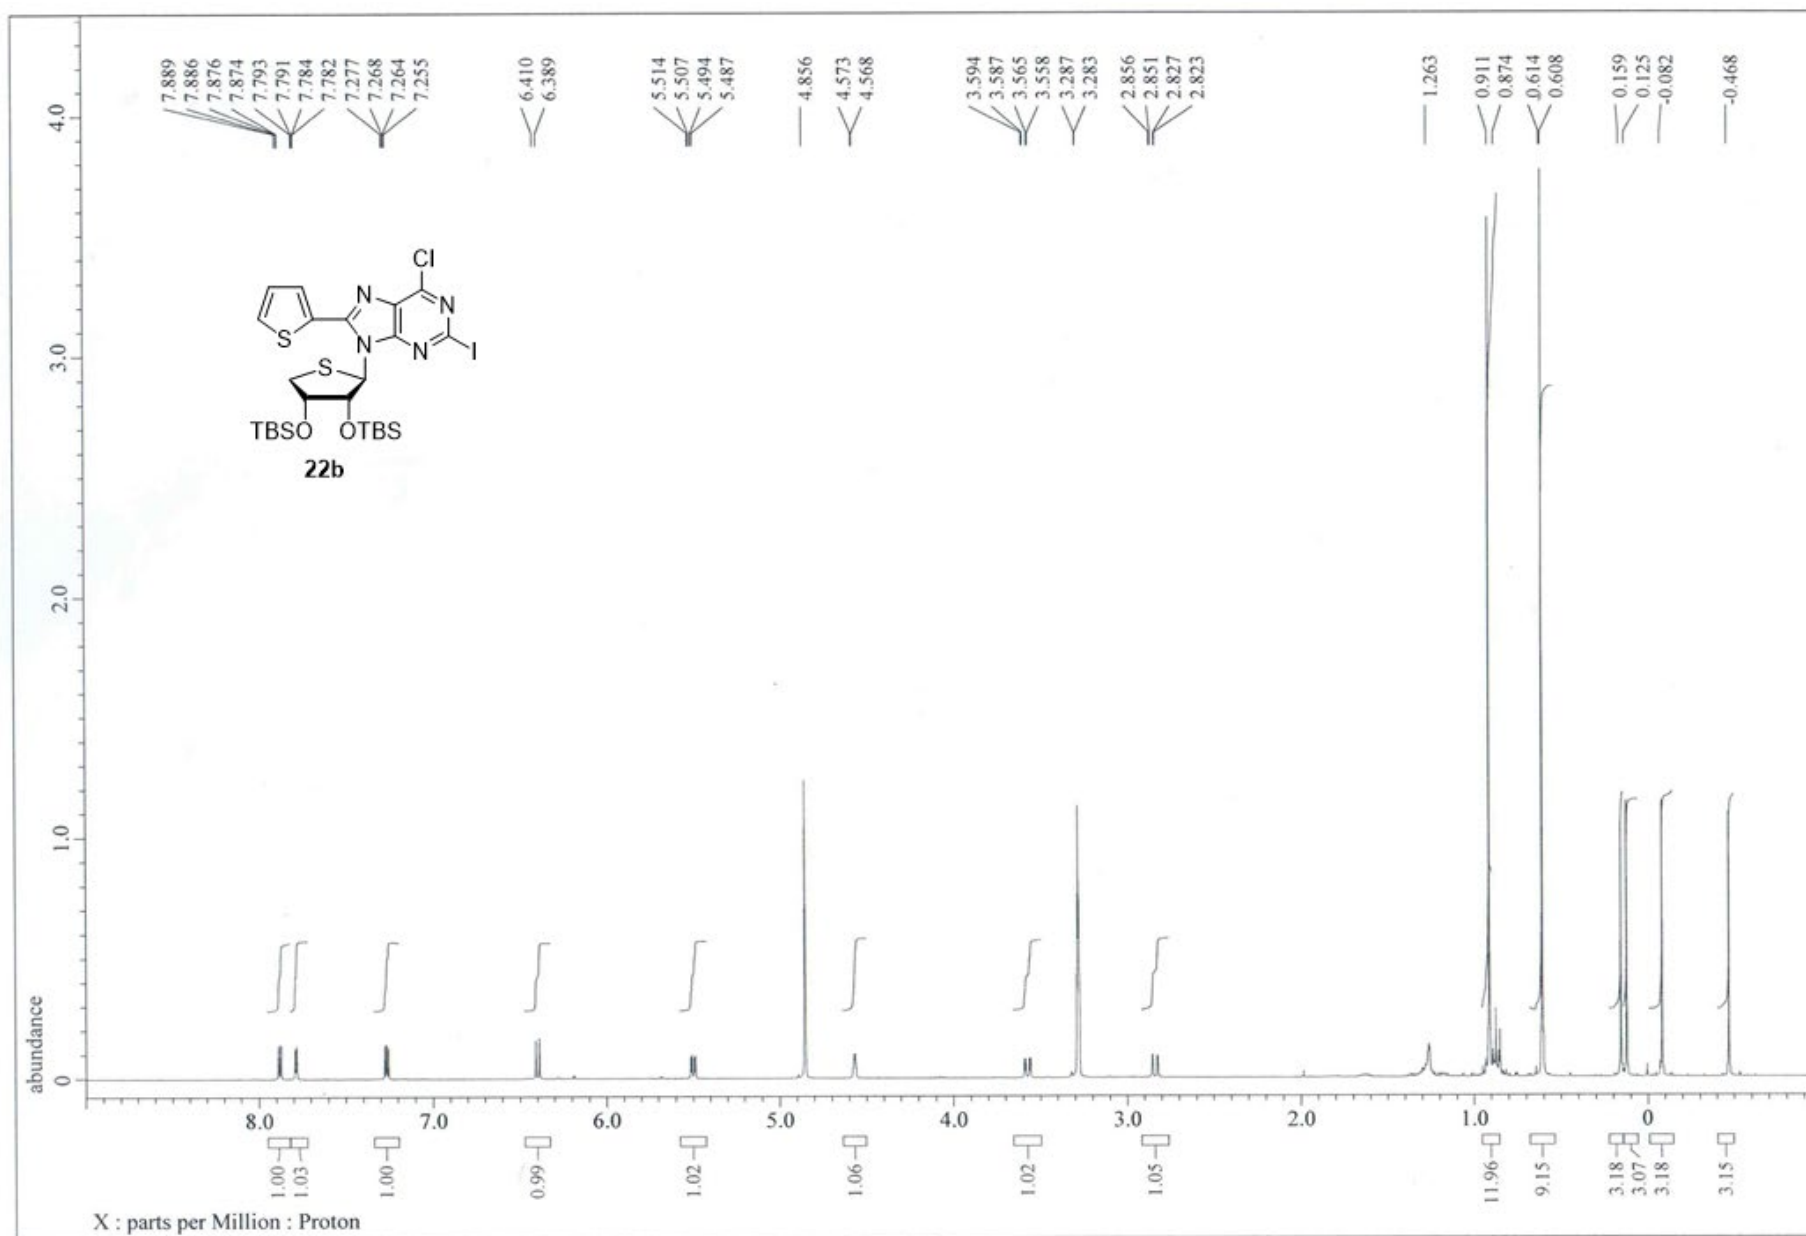

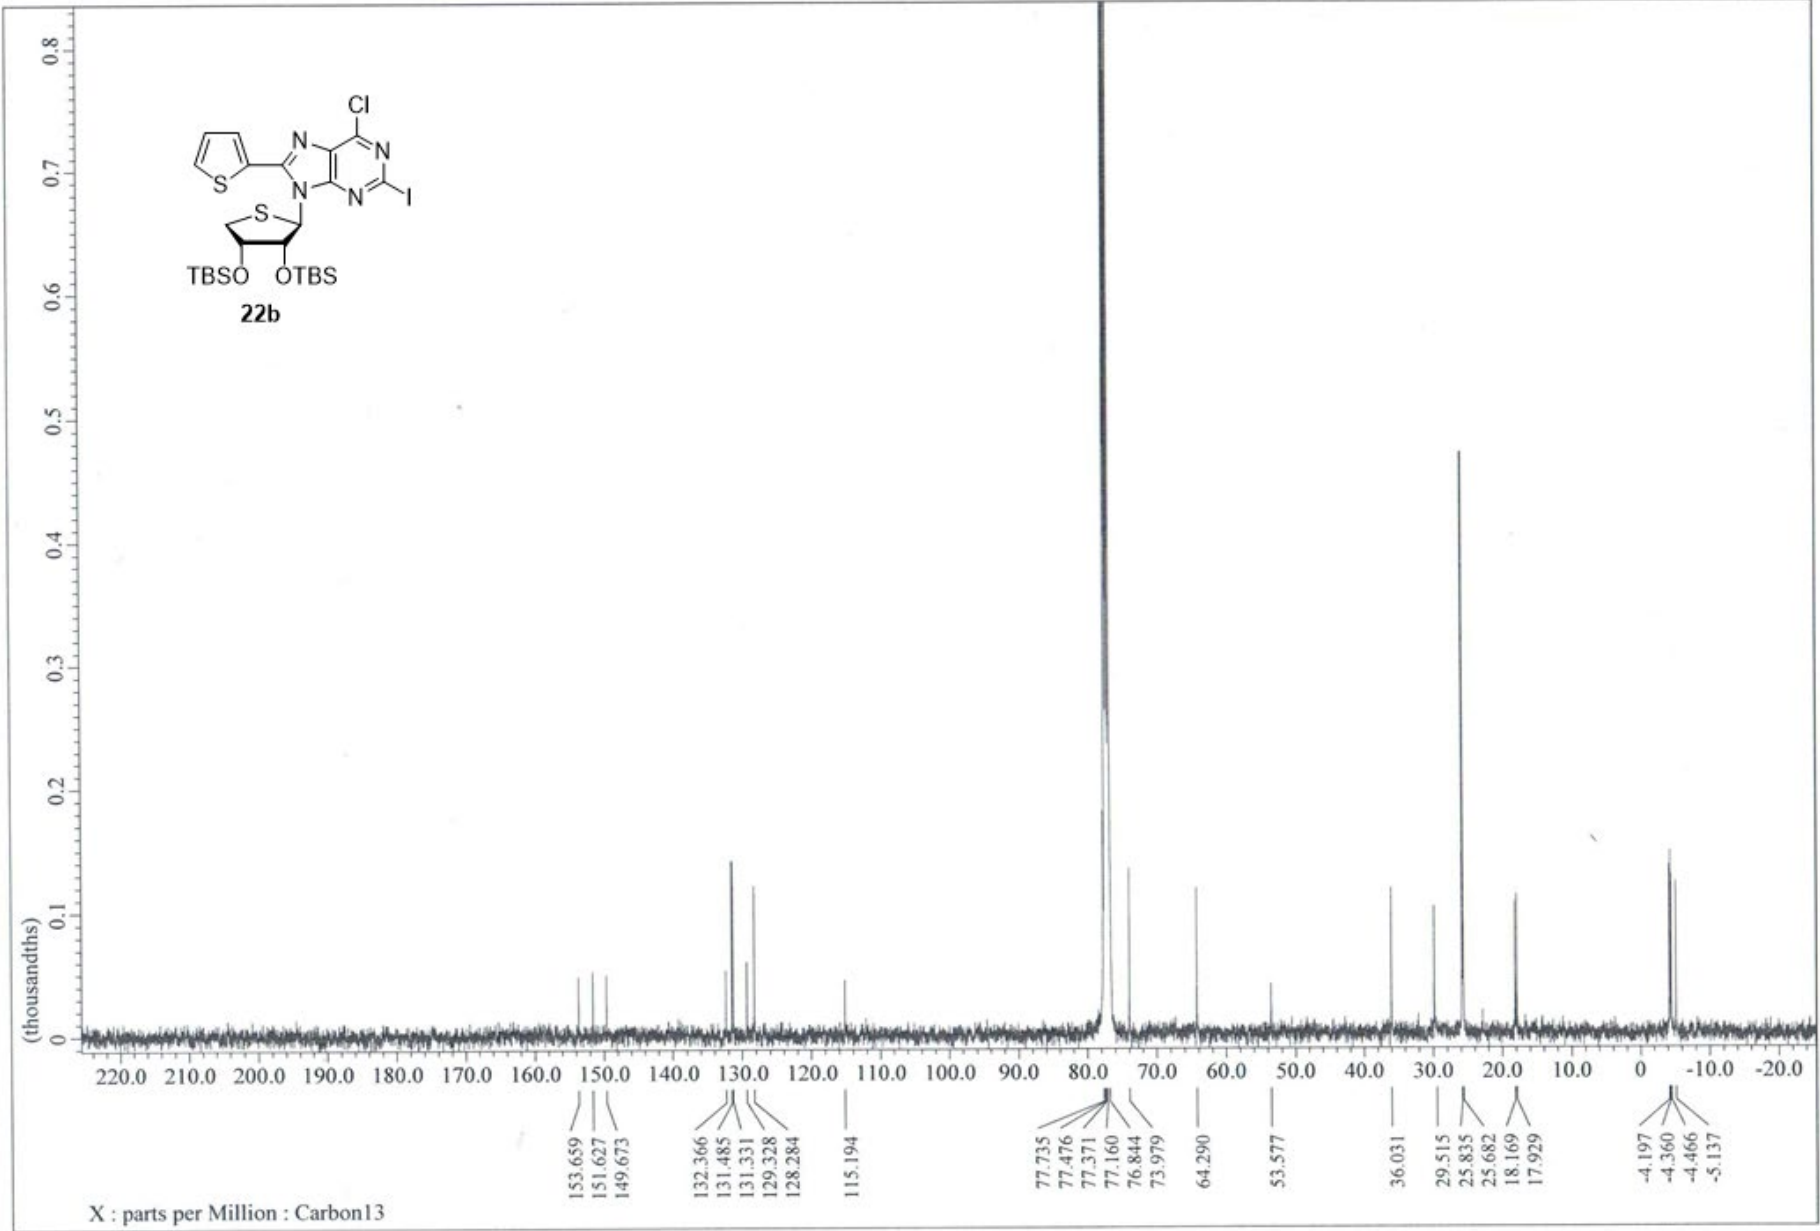

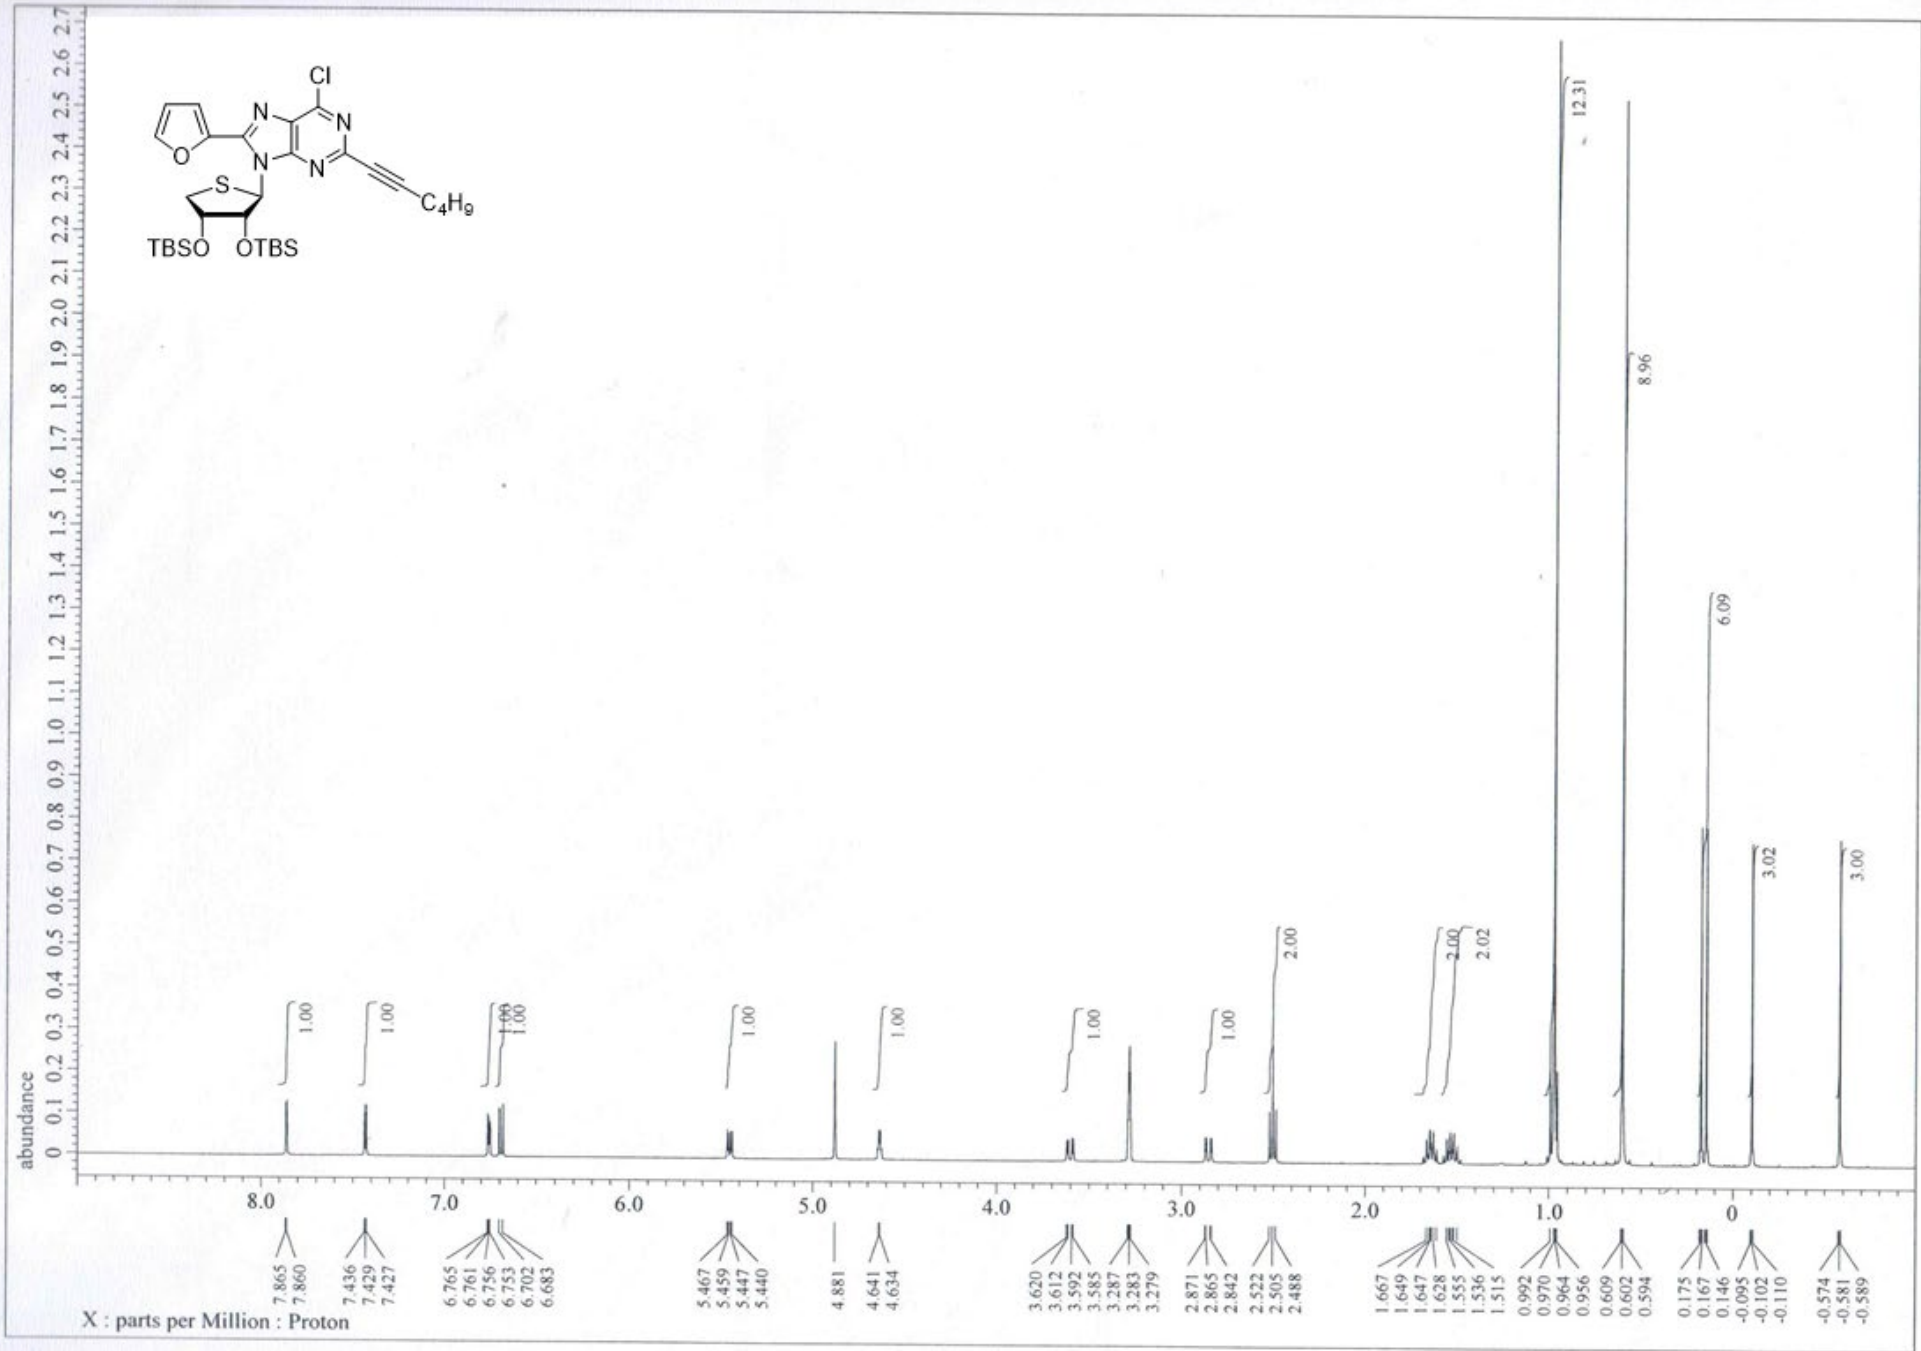

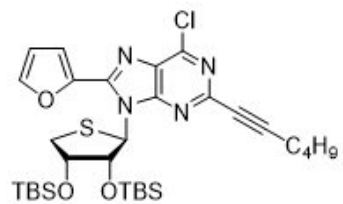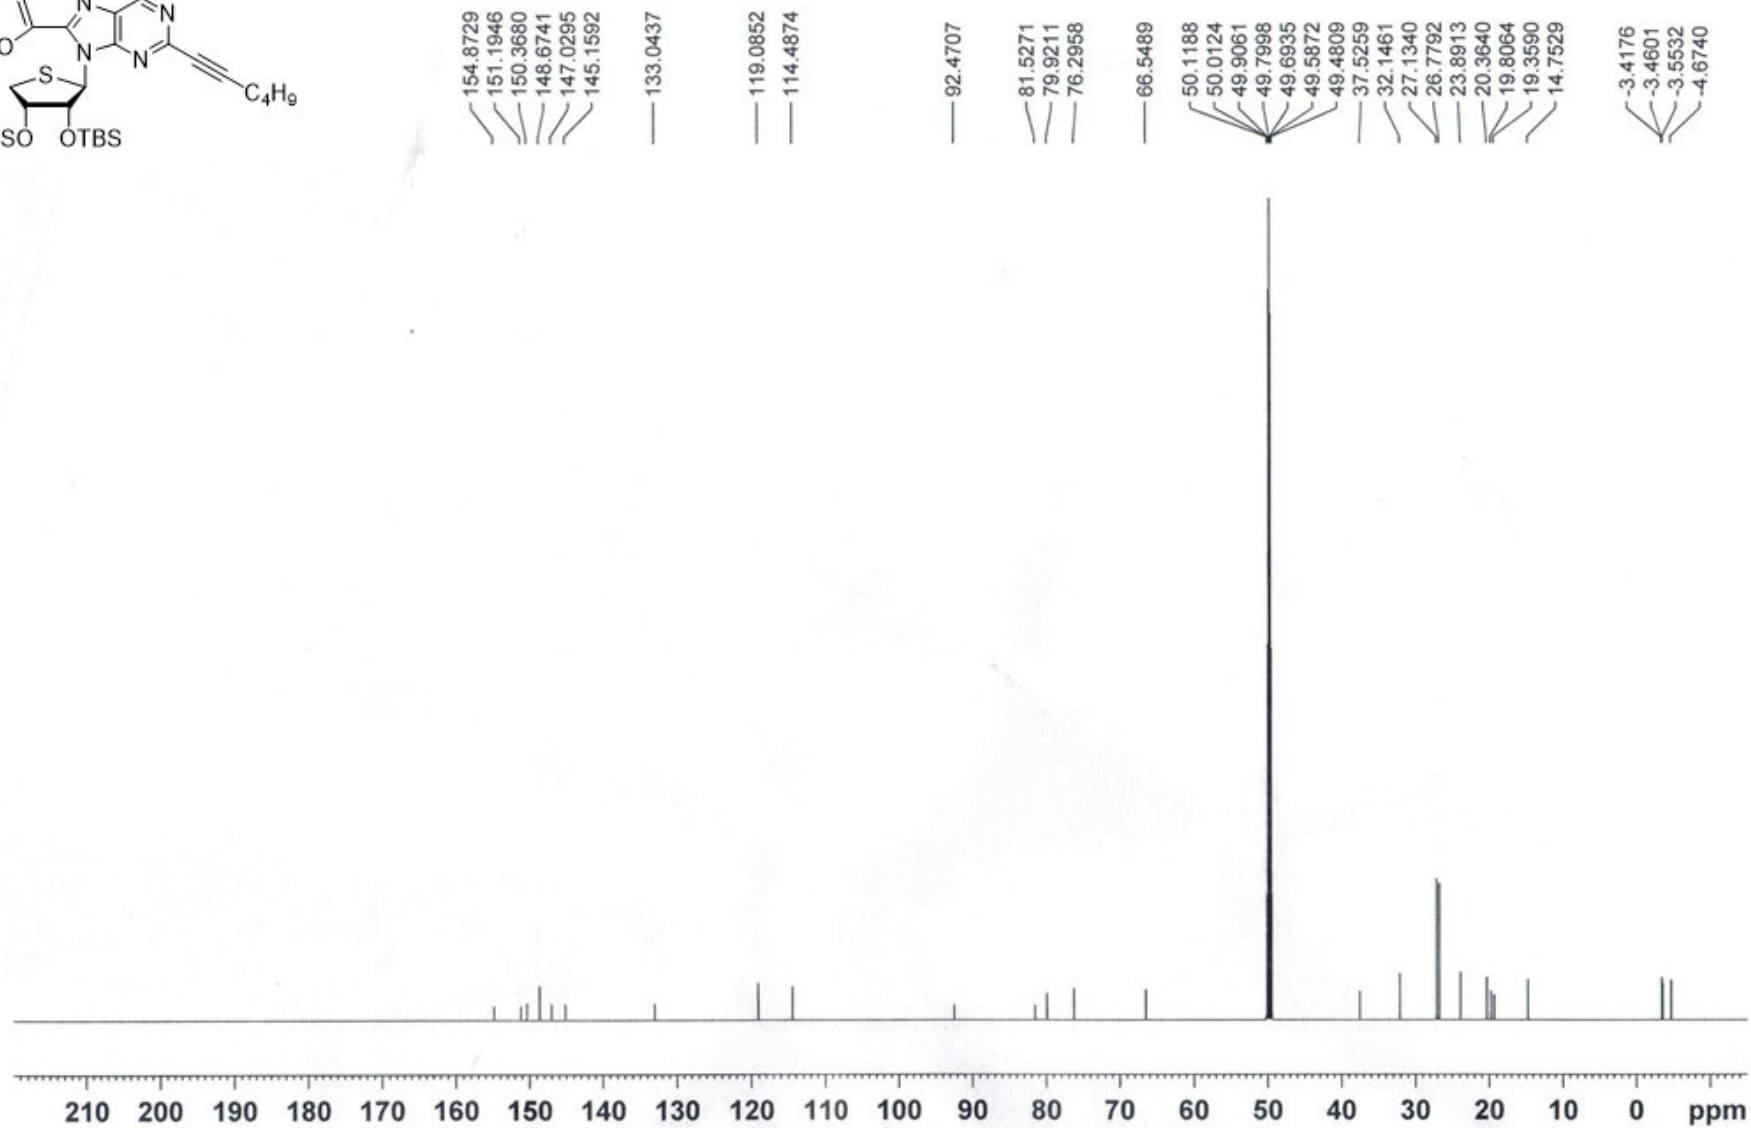

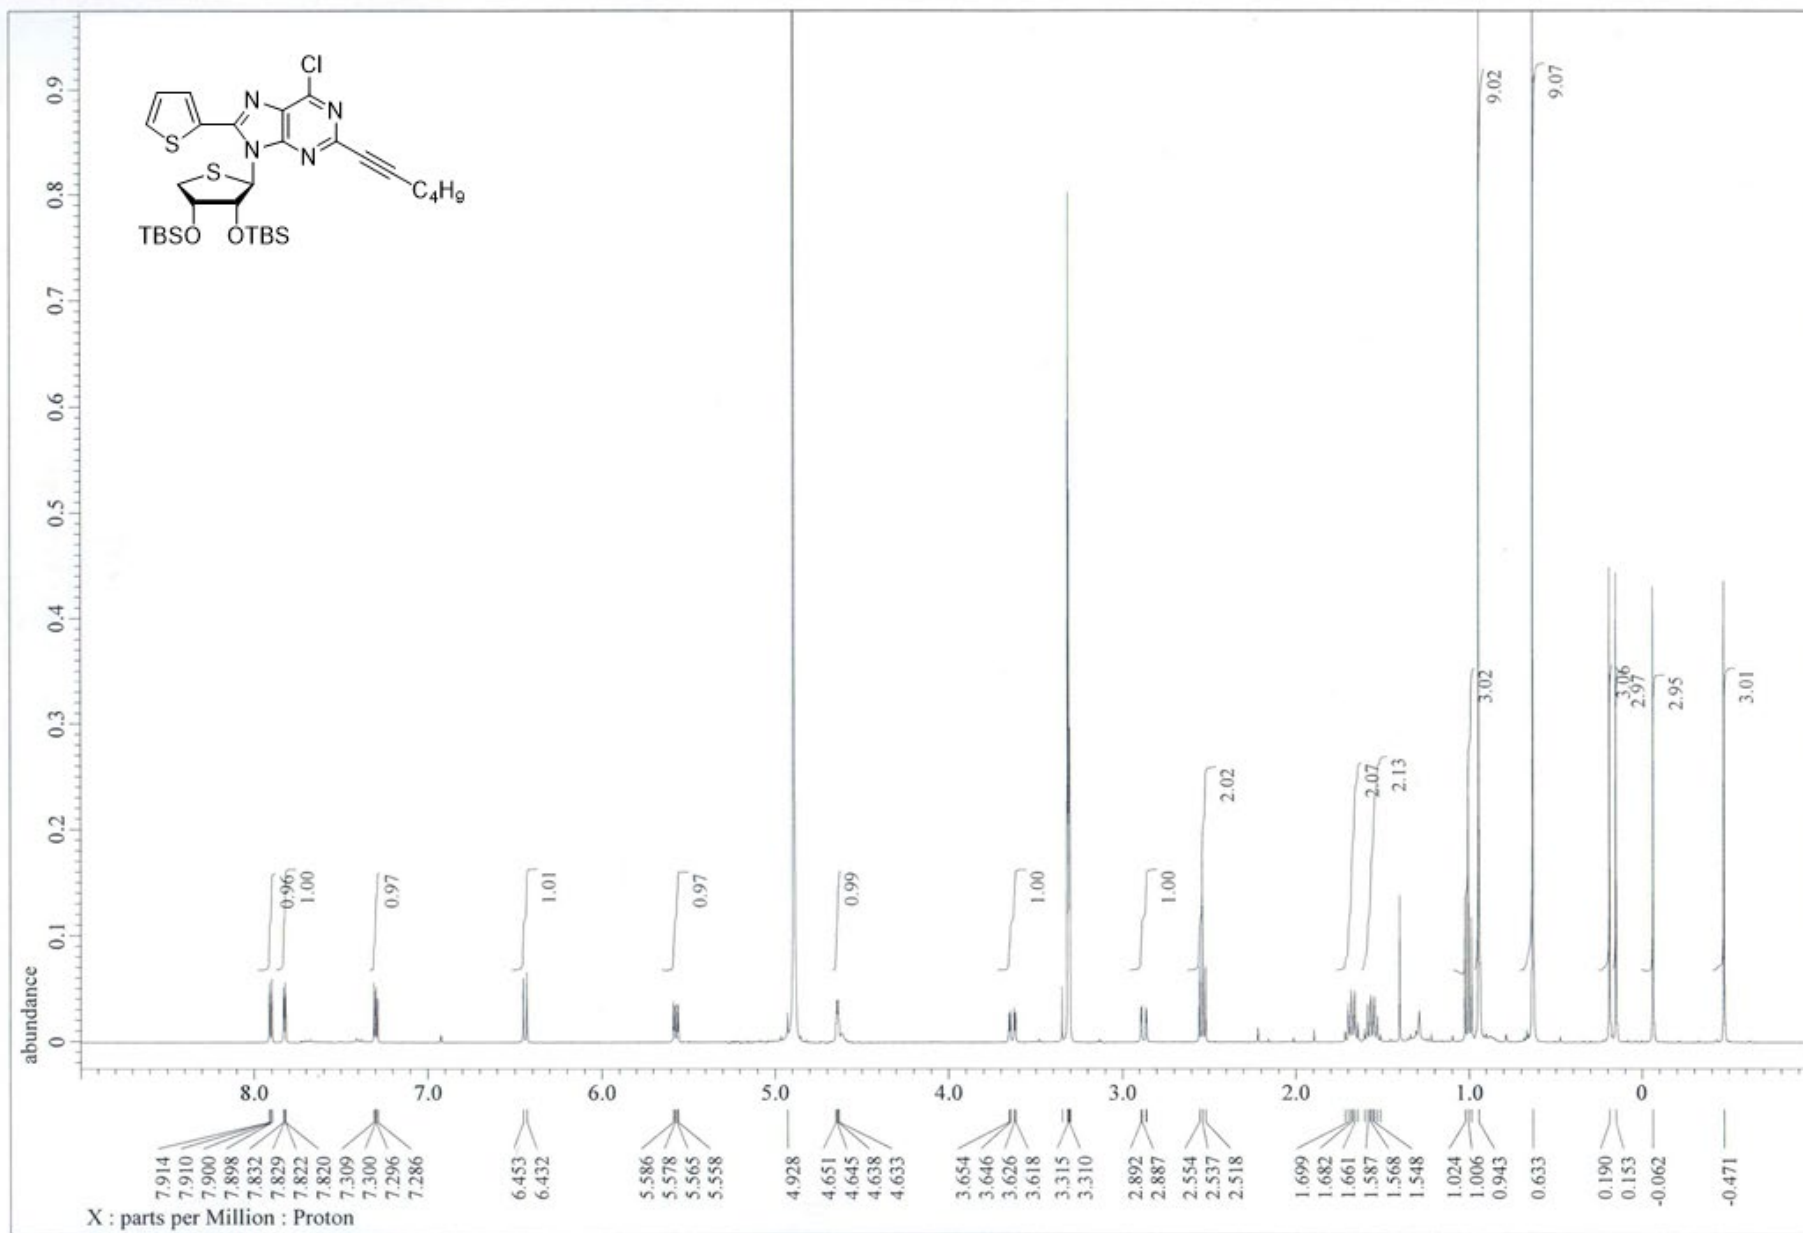

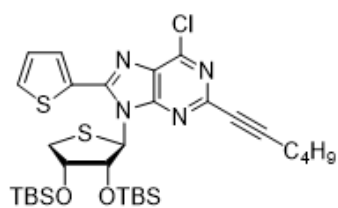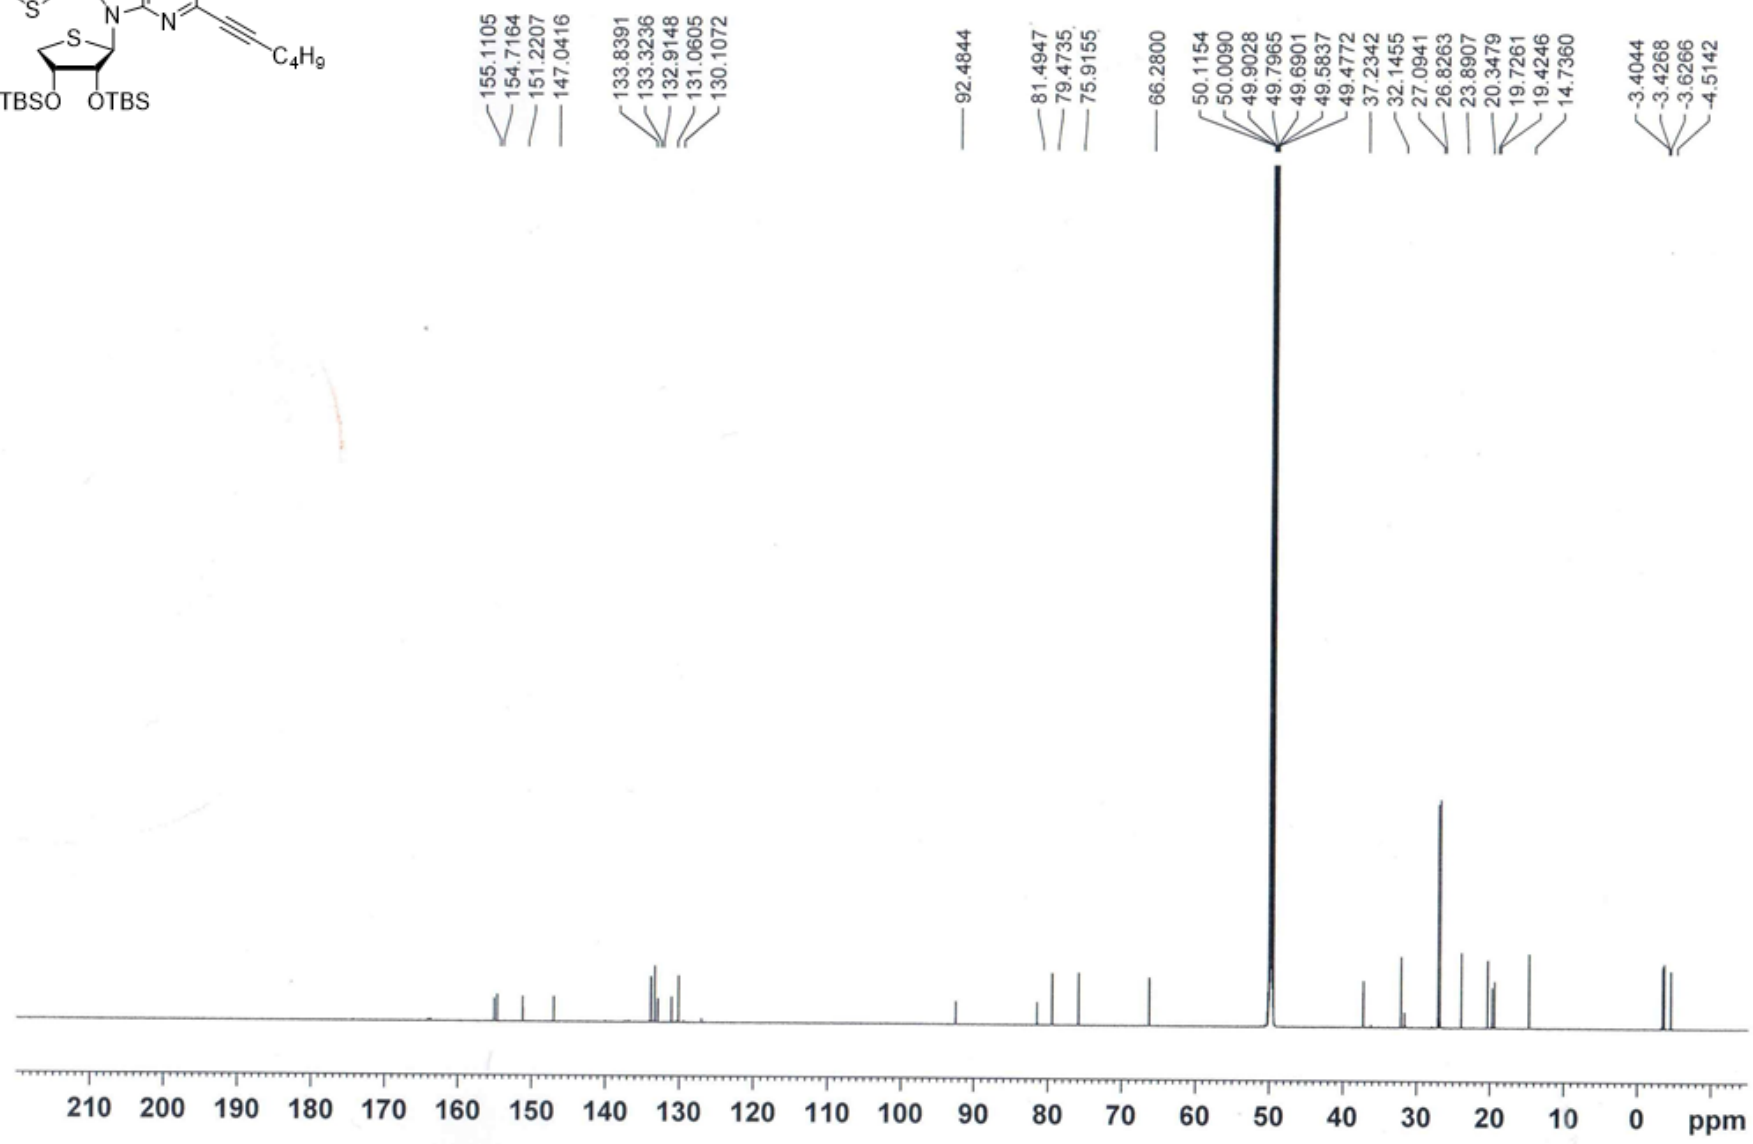

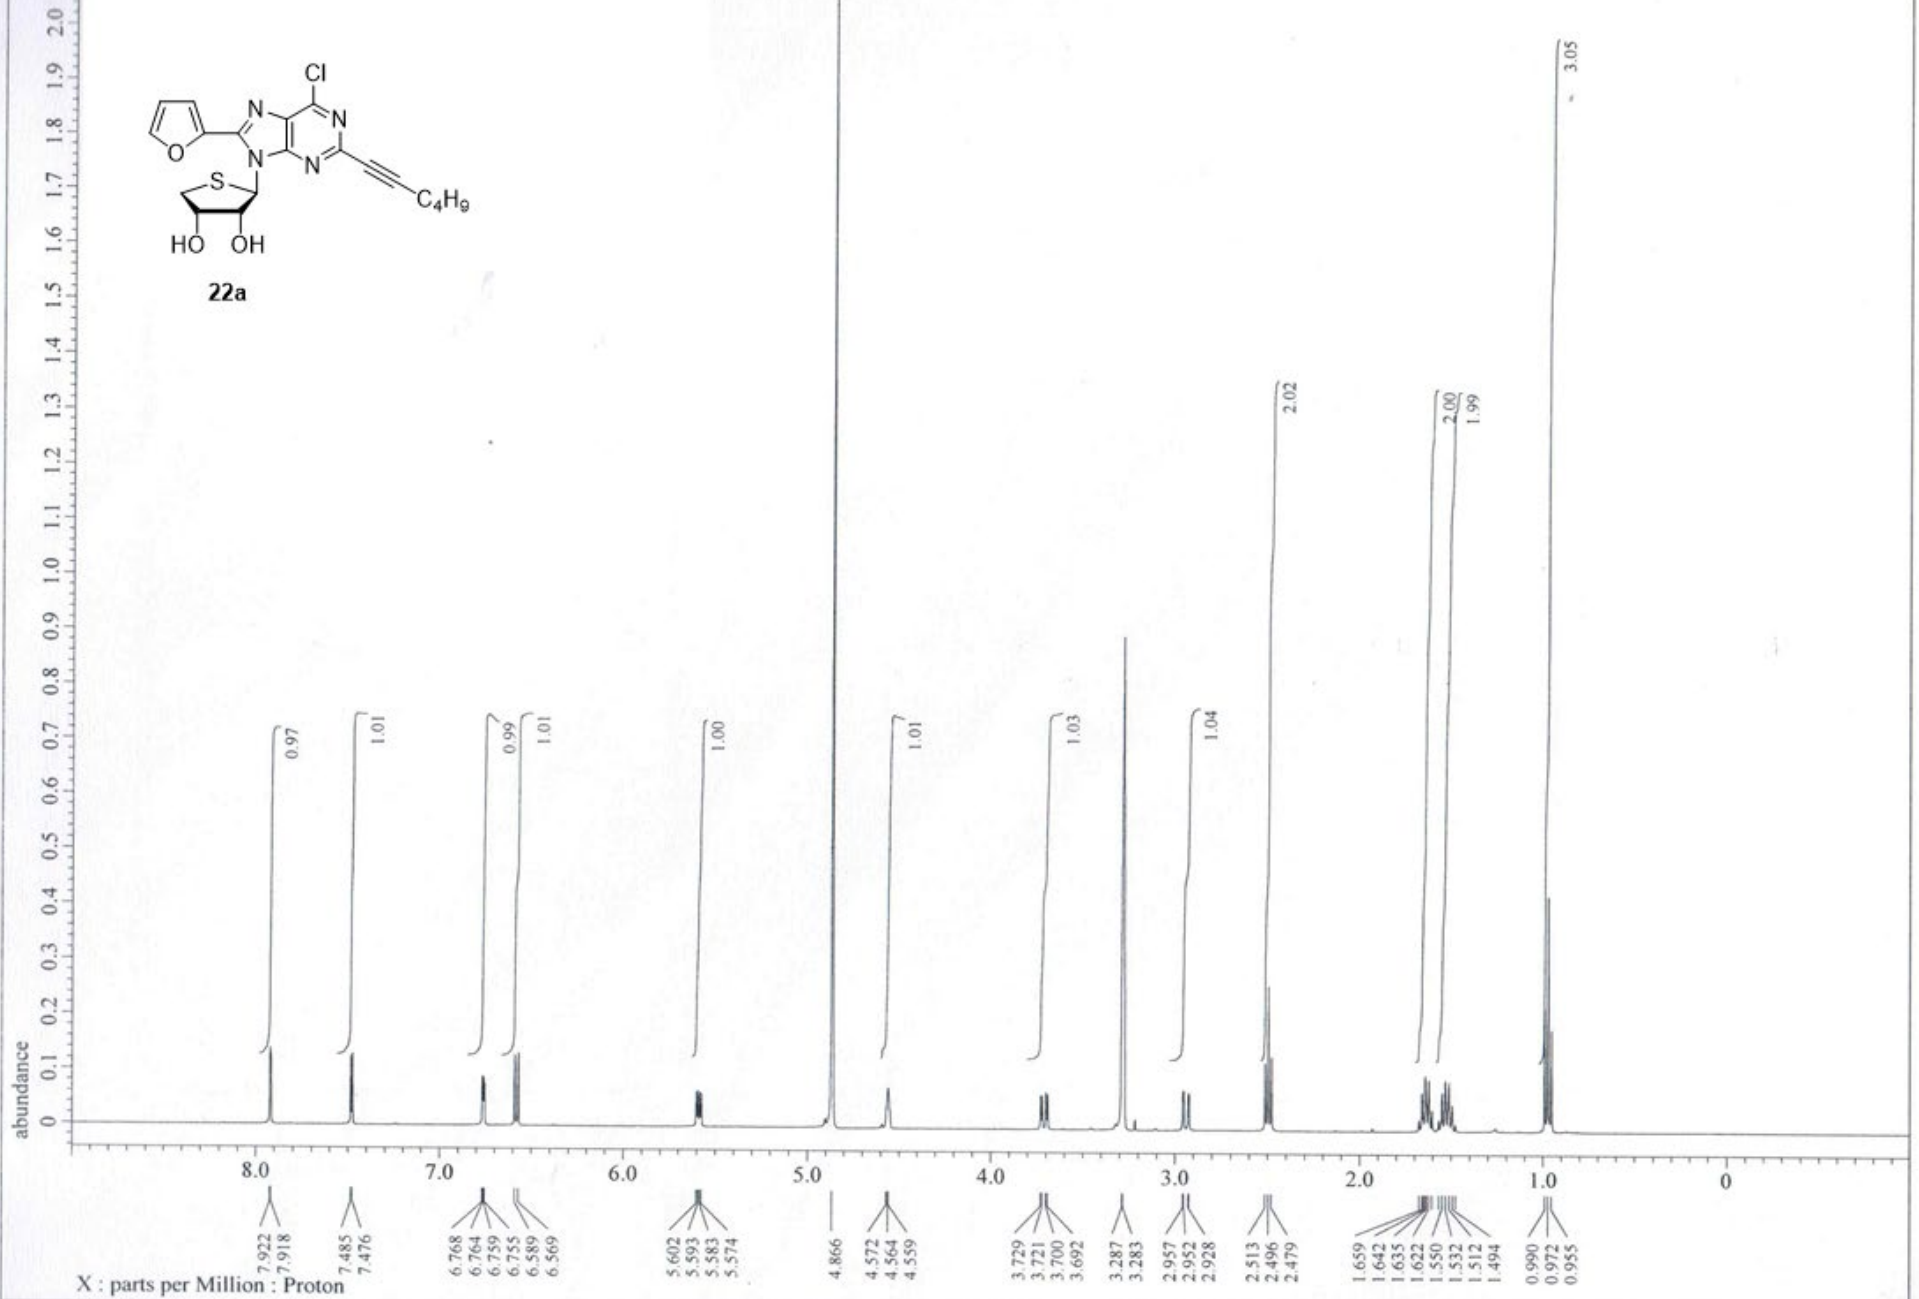



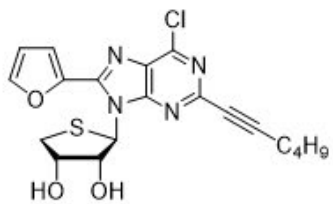

22a

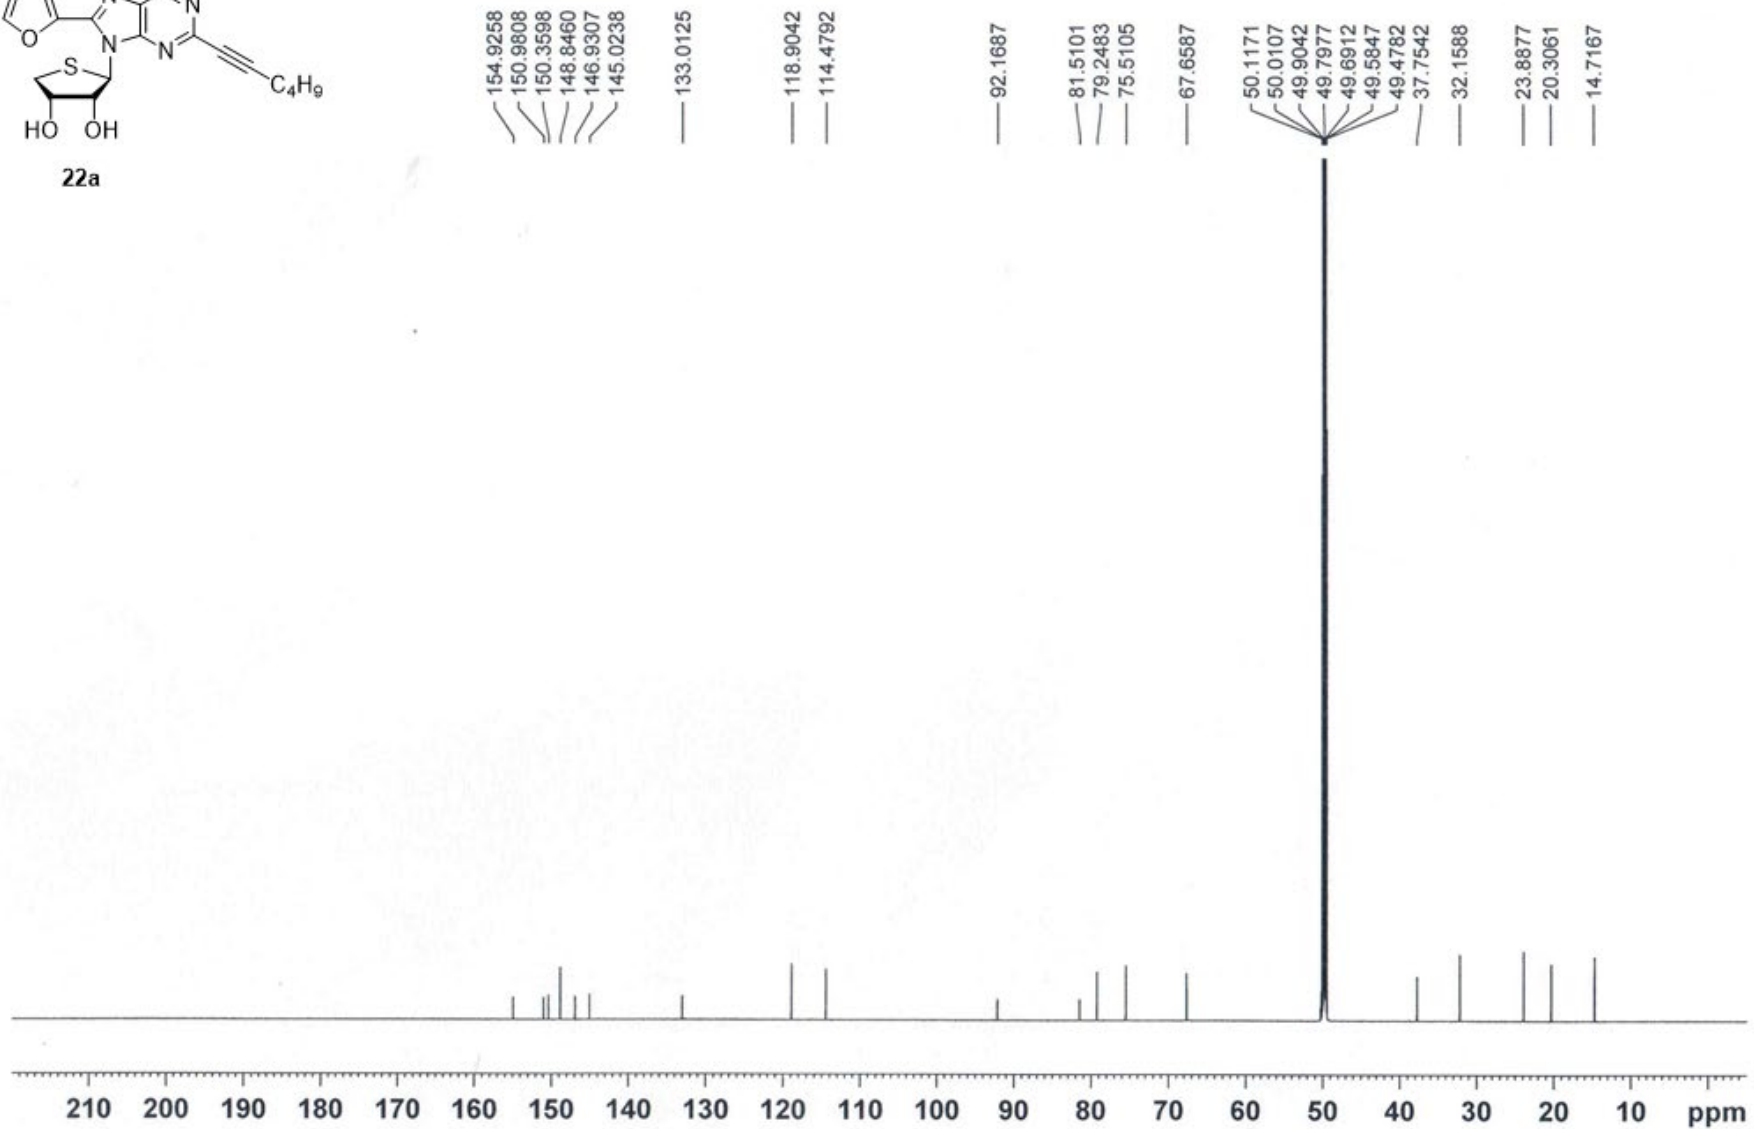

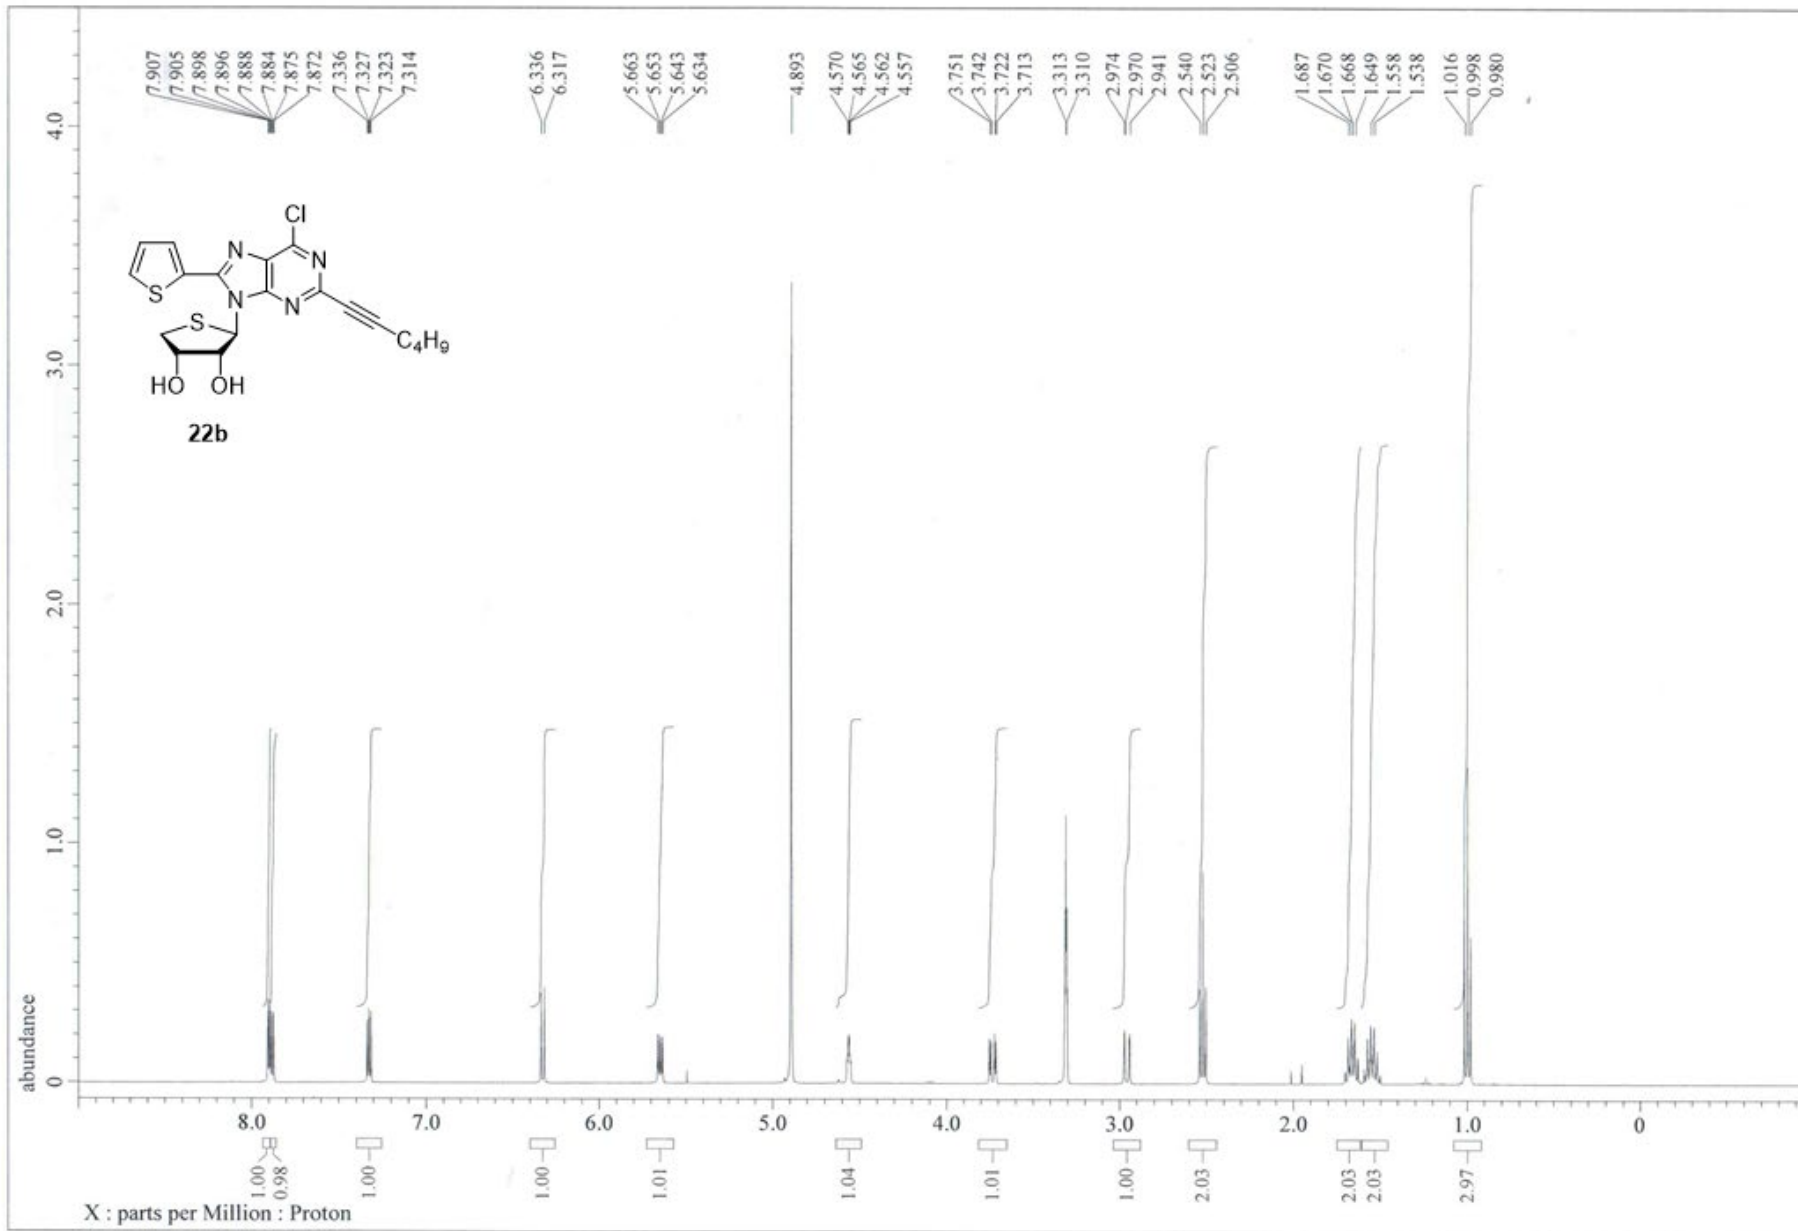

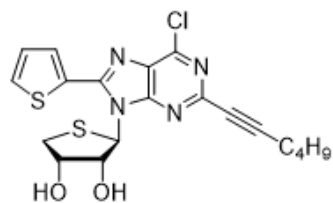

22b

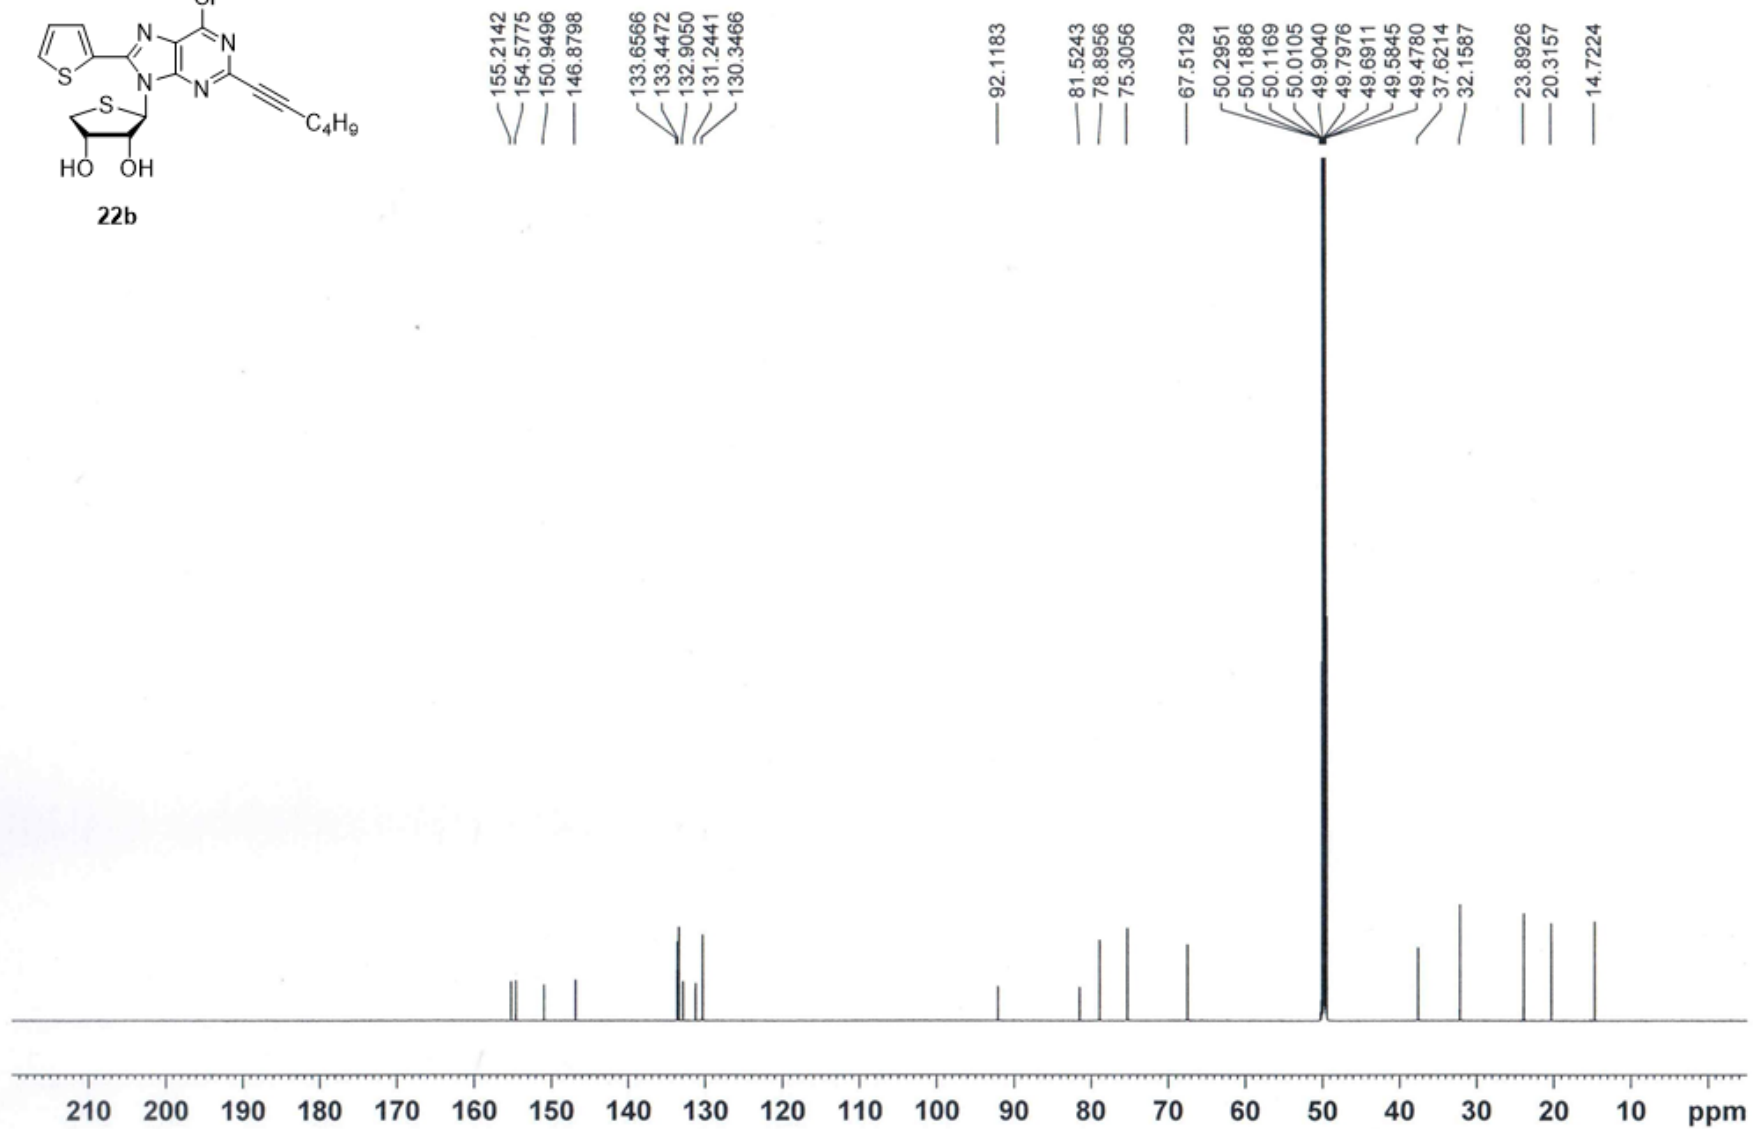

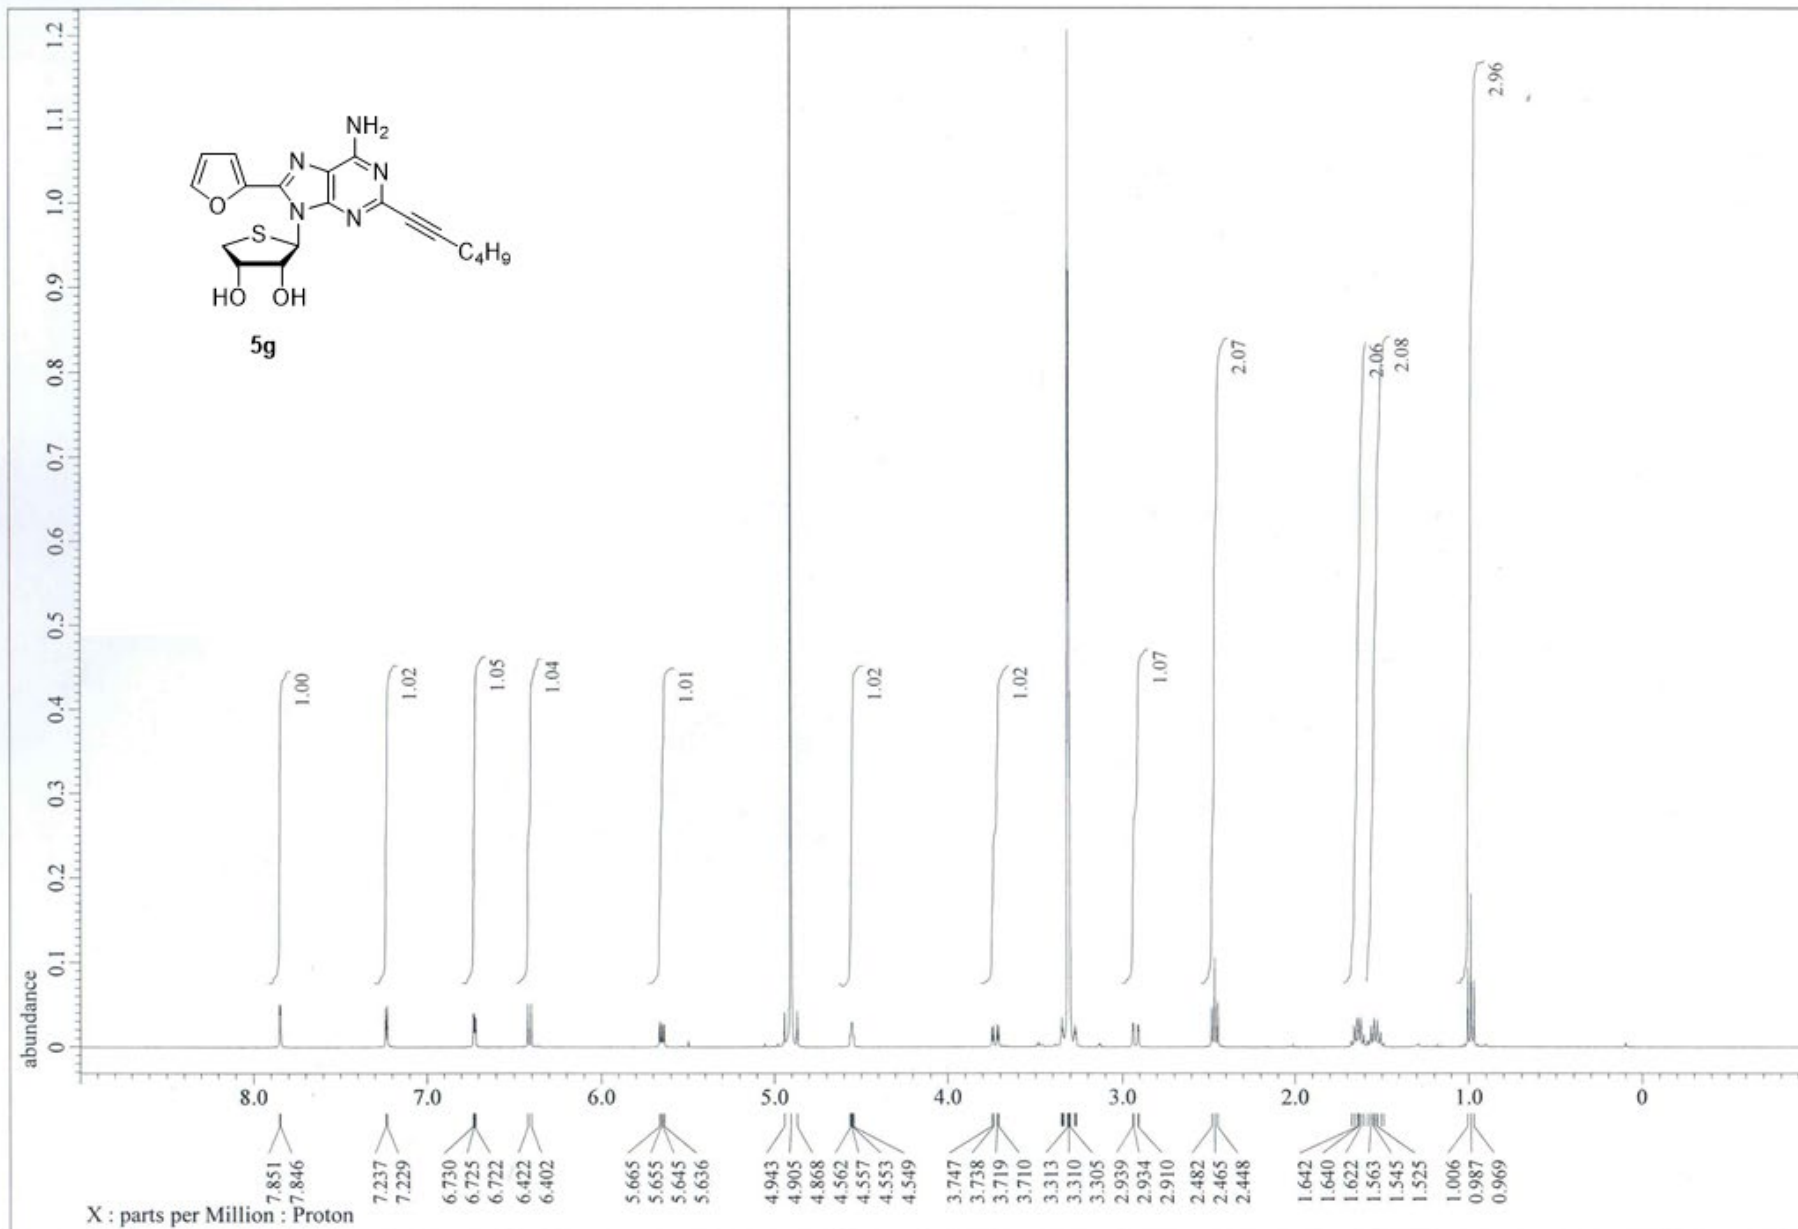

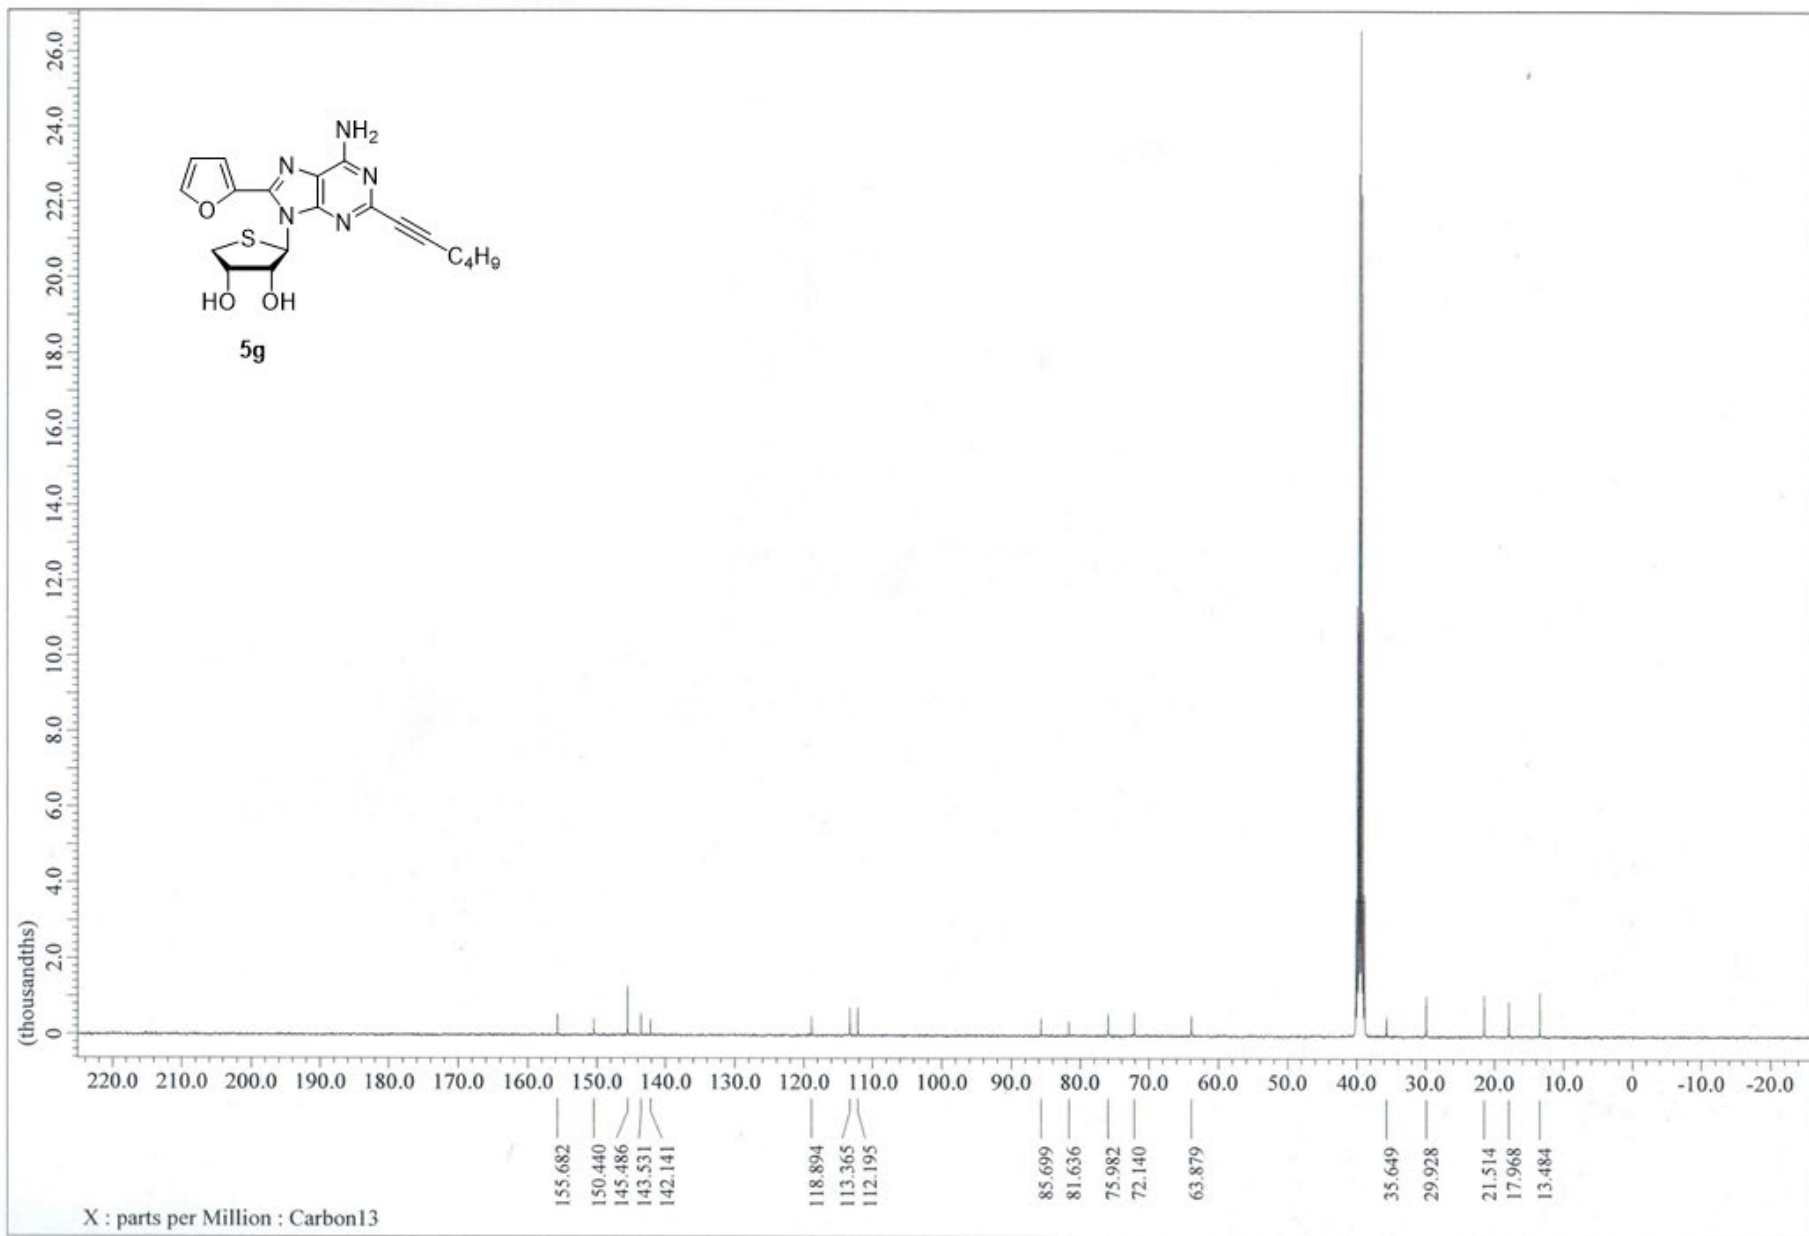

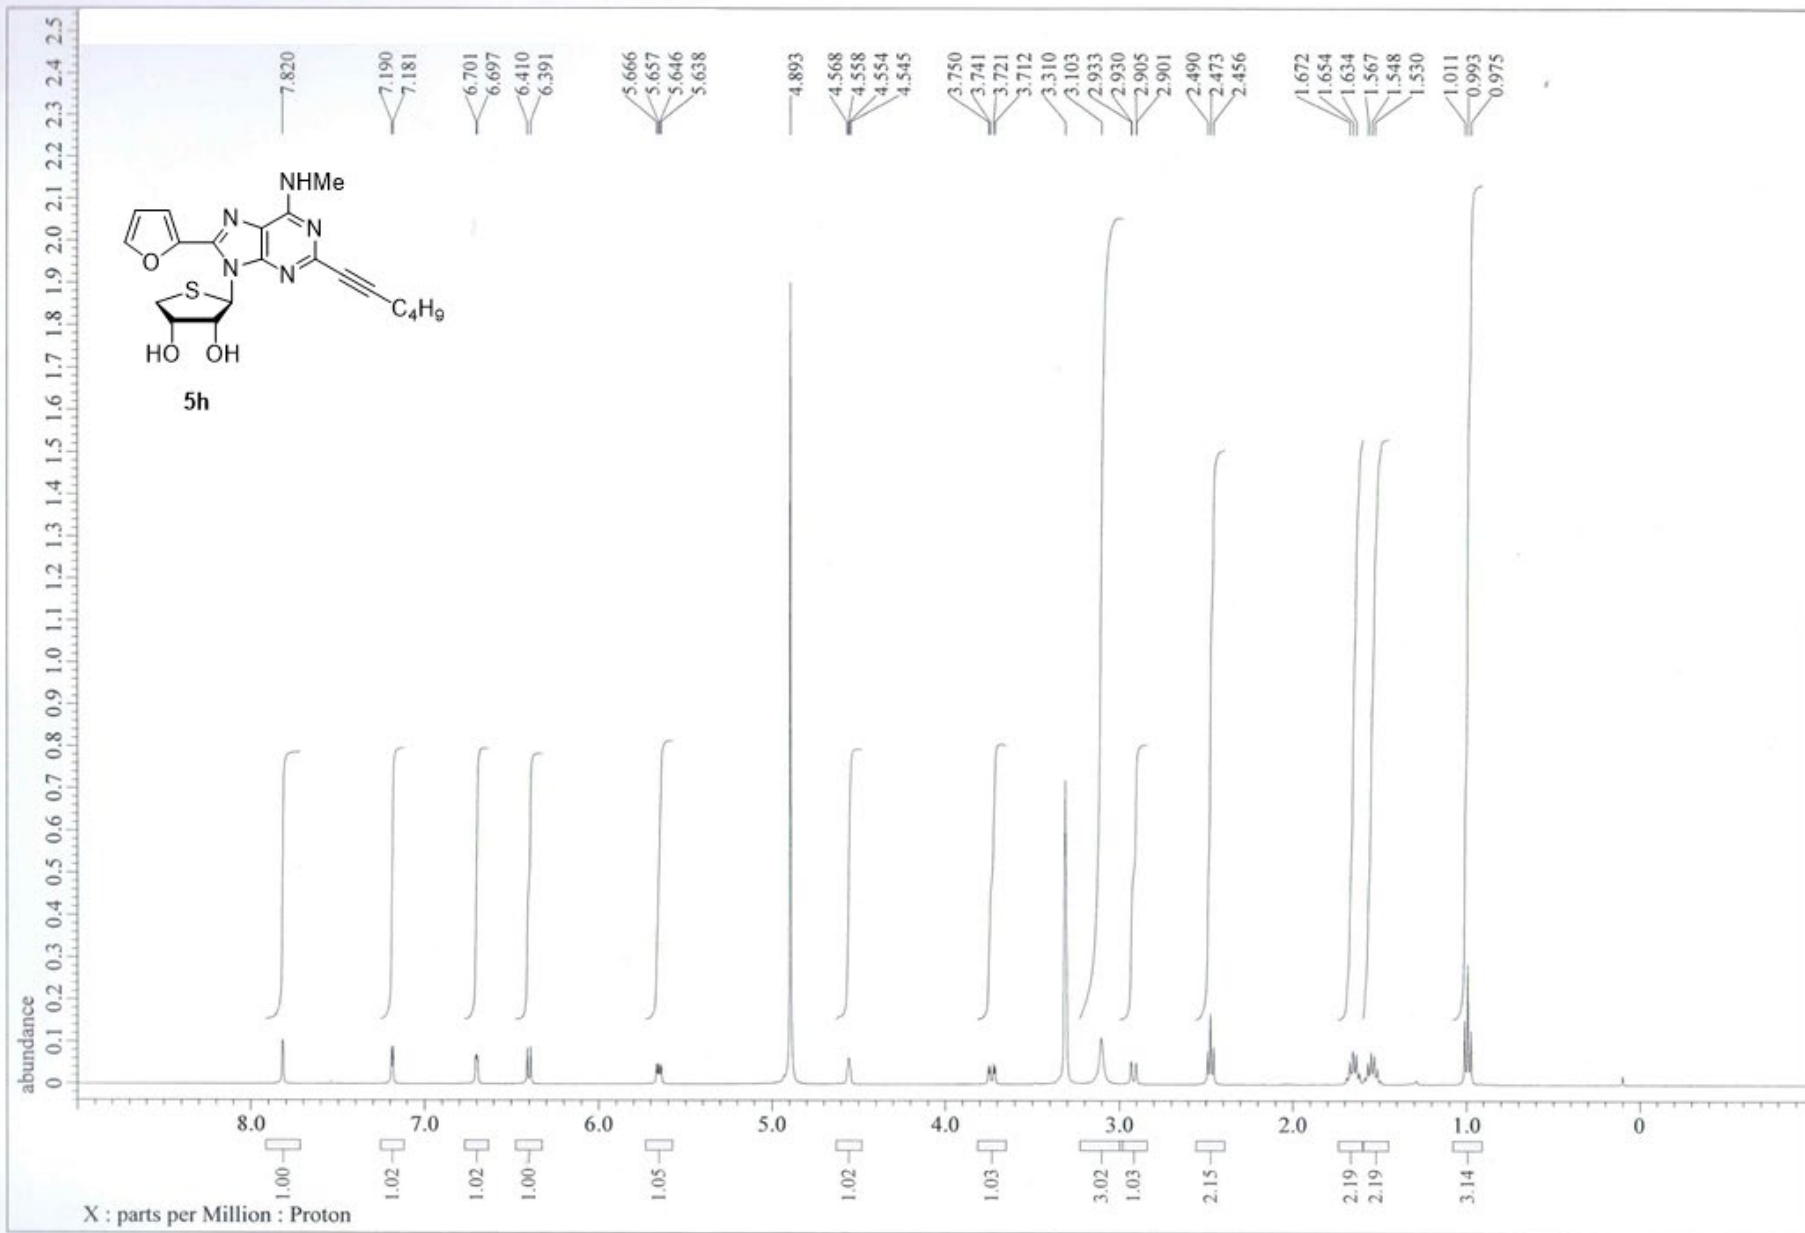

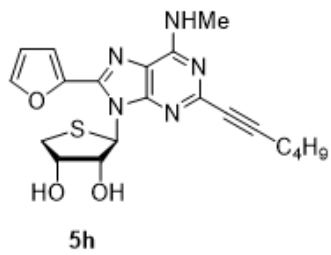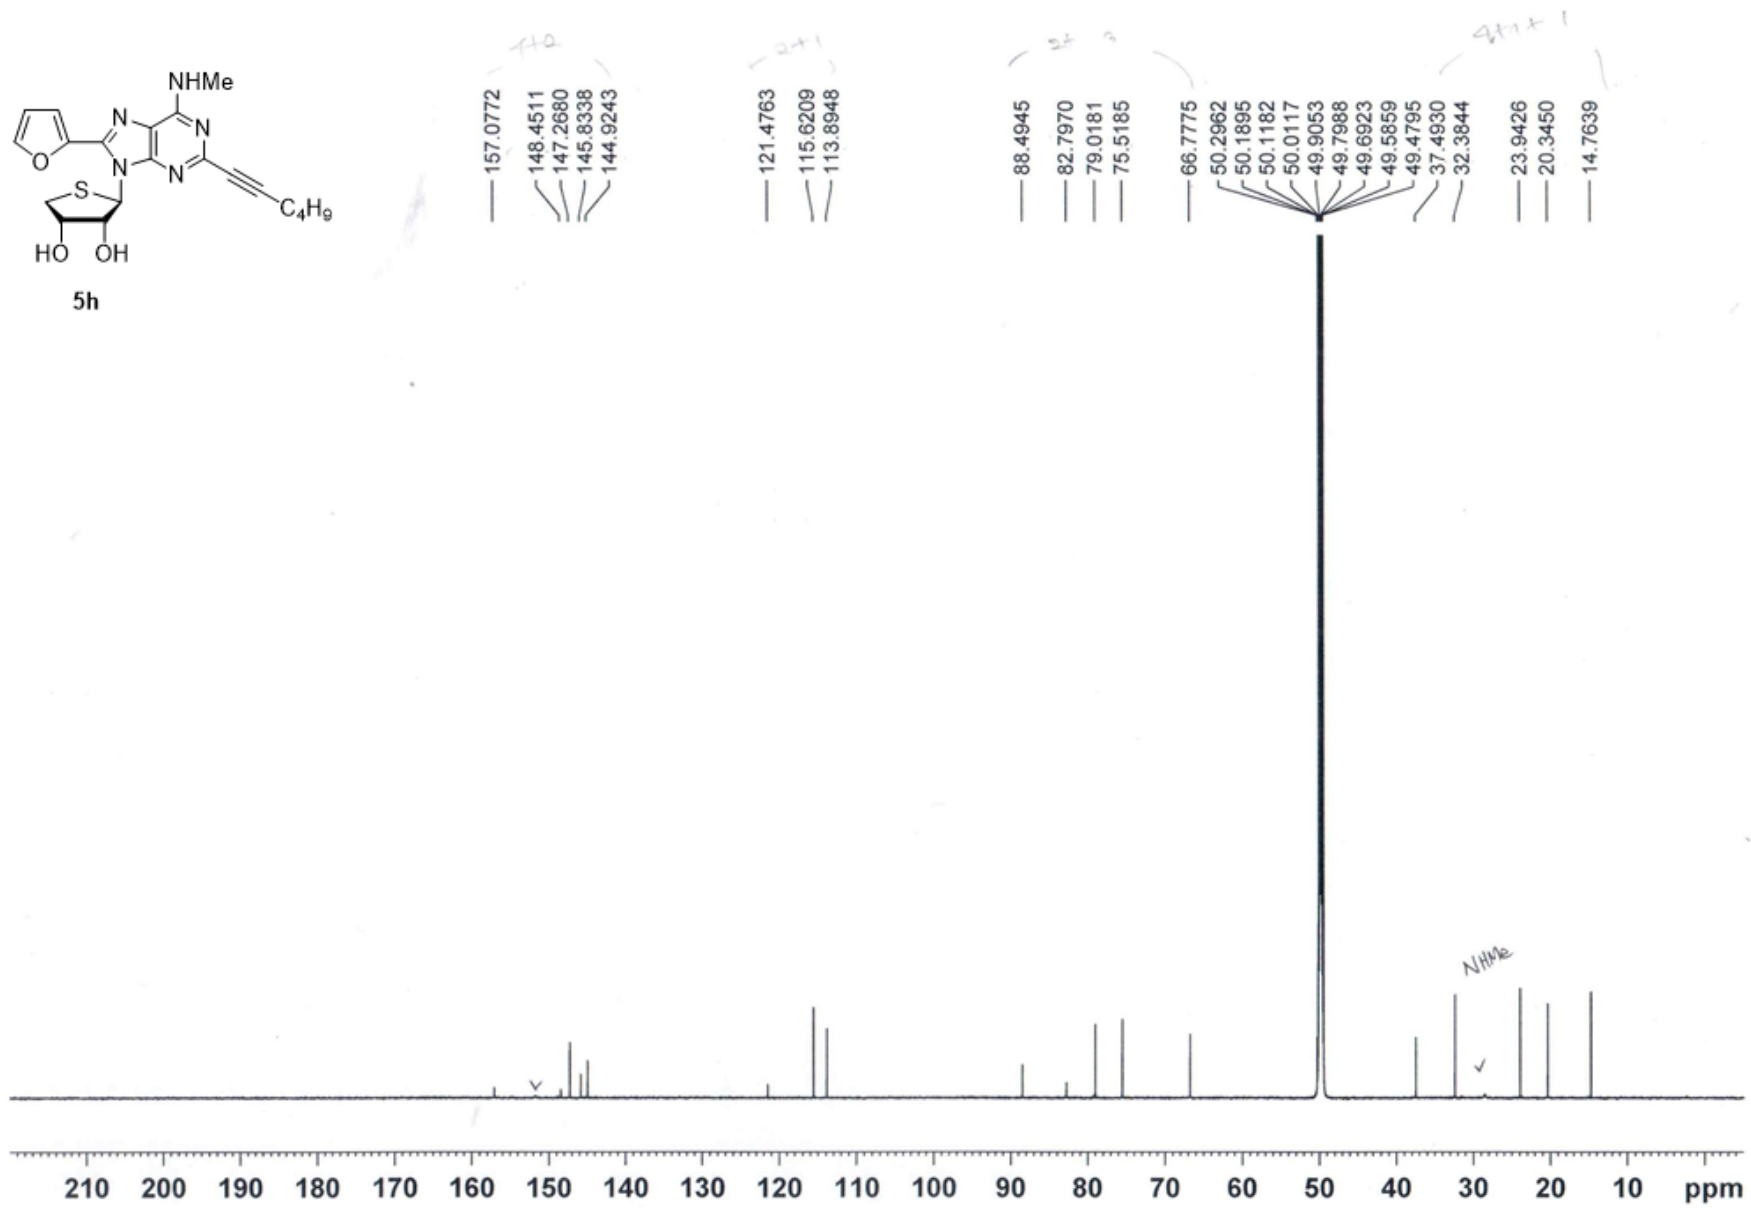

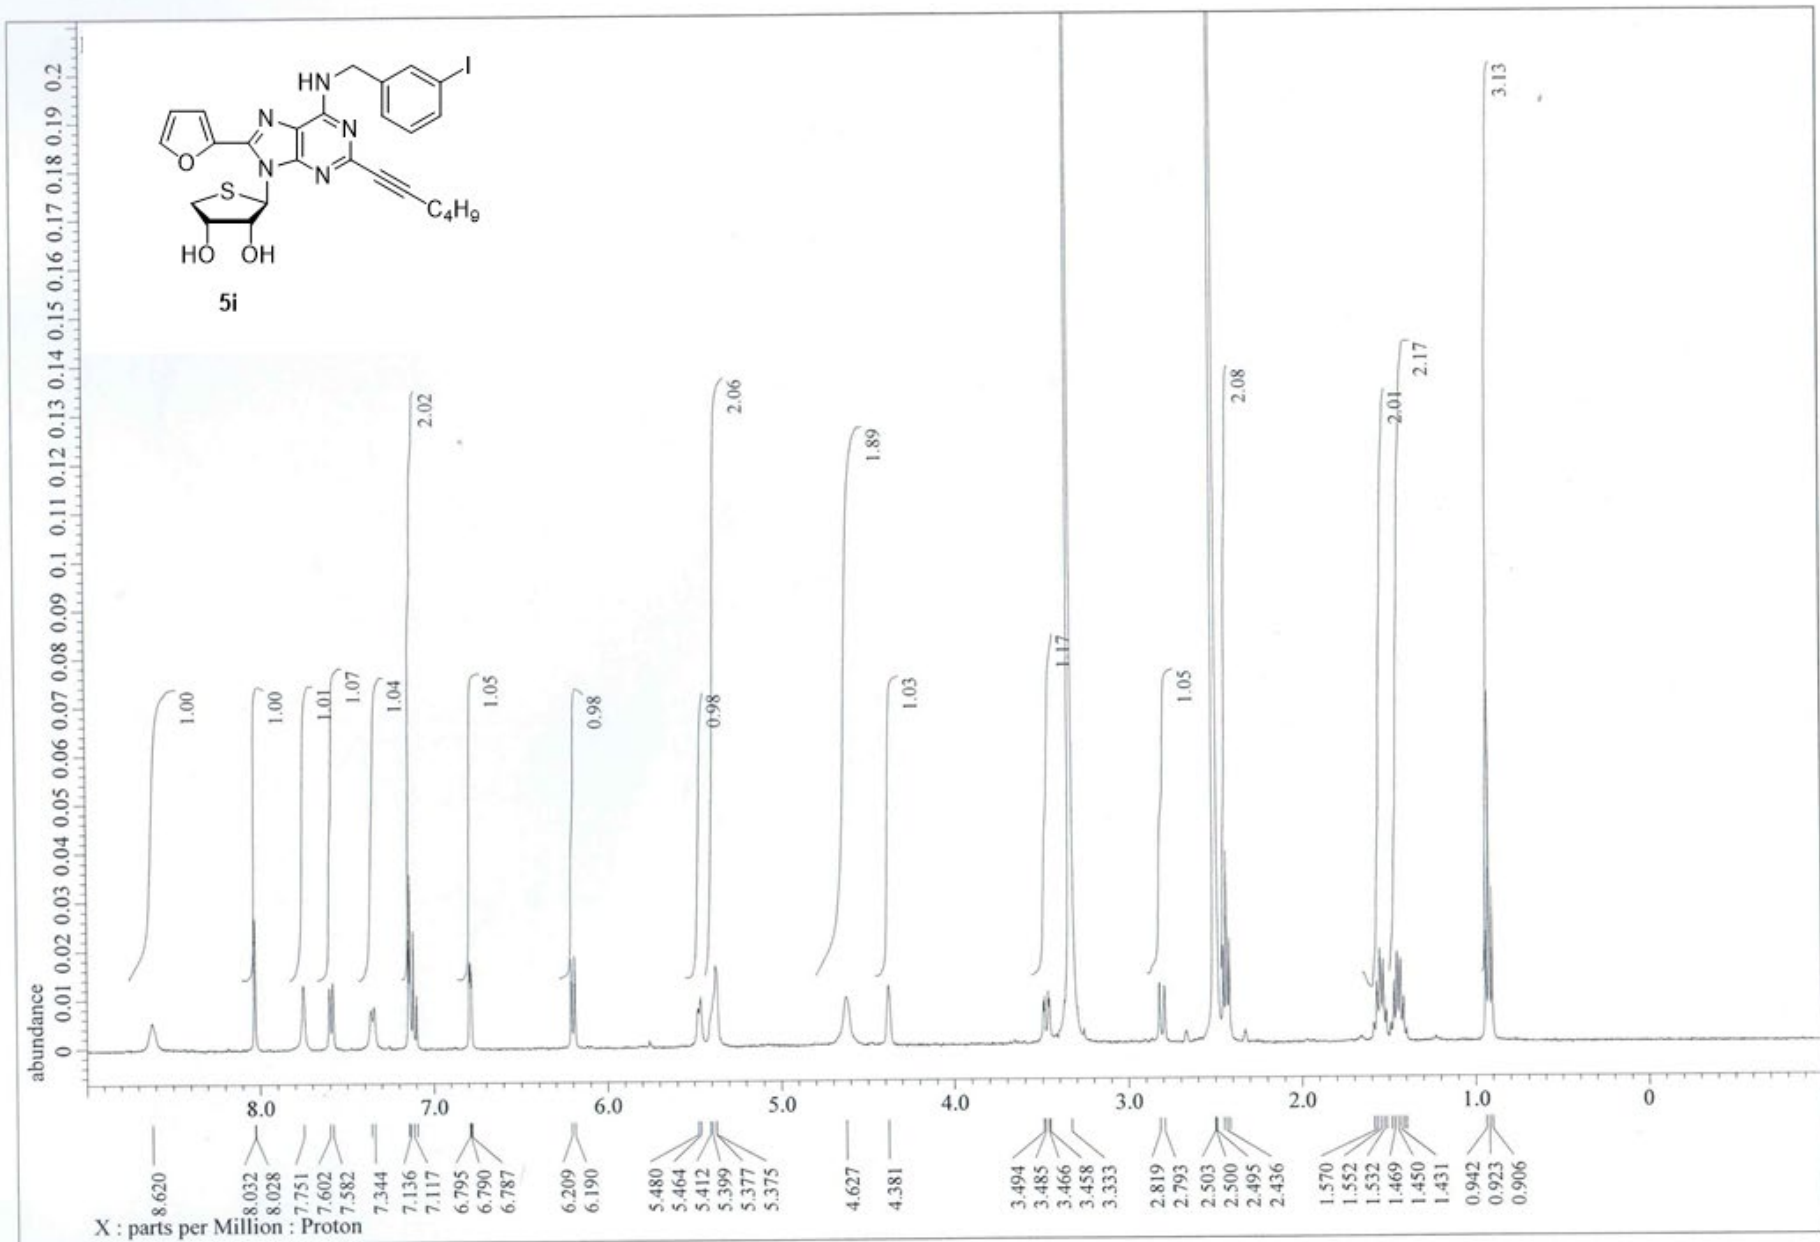



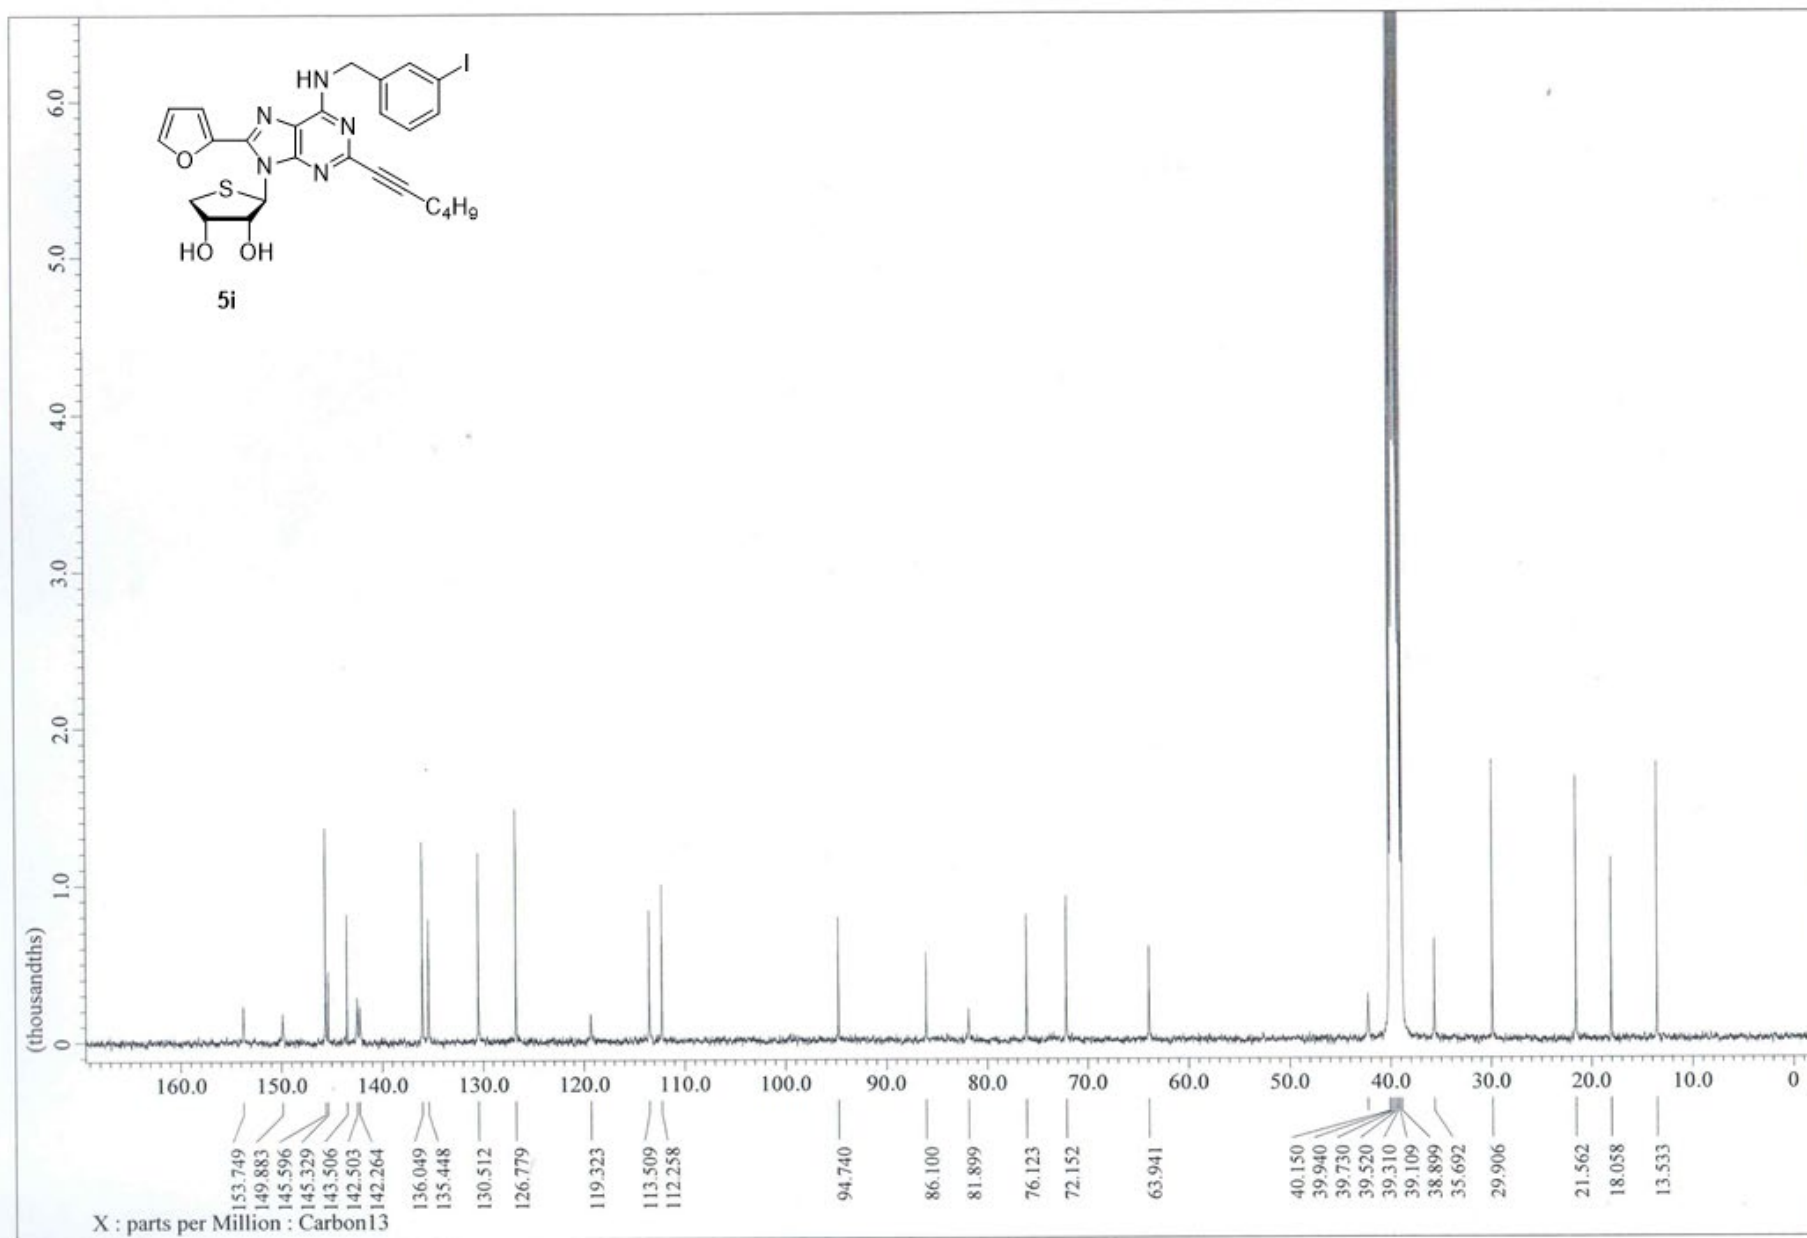

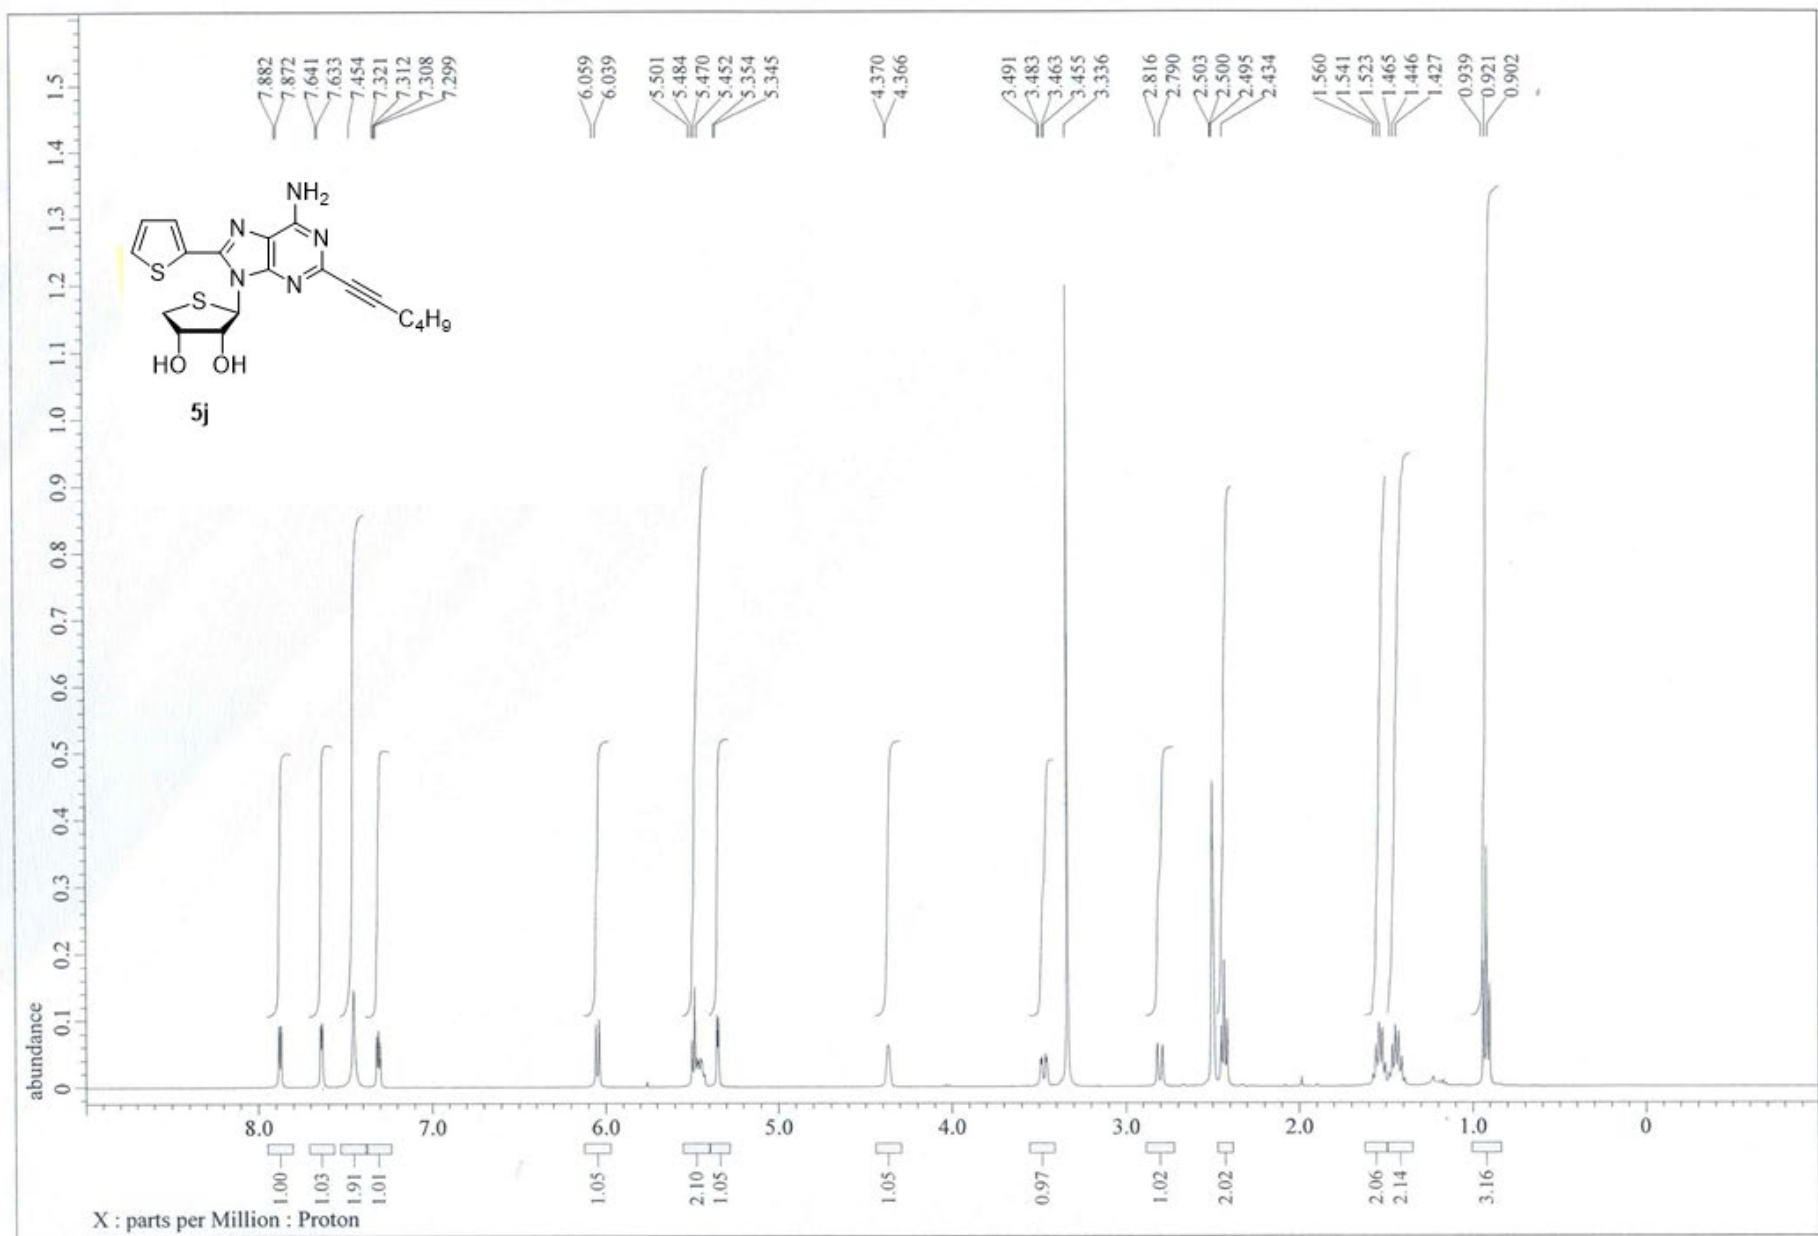

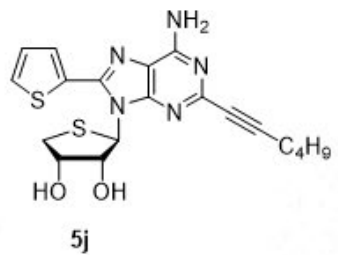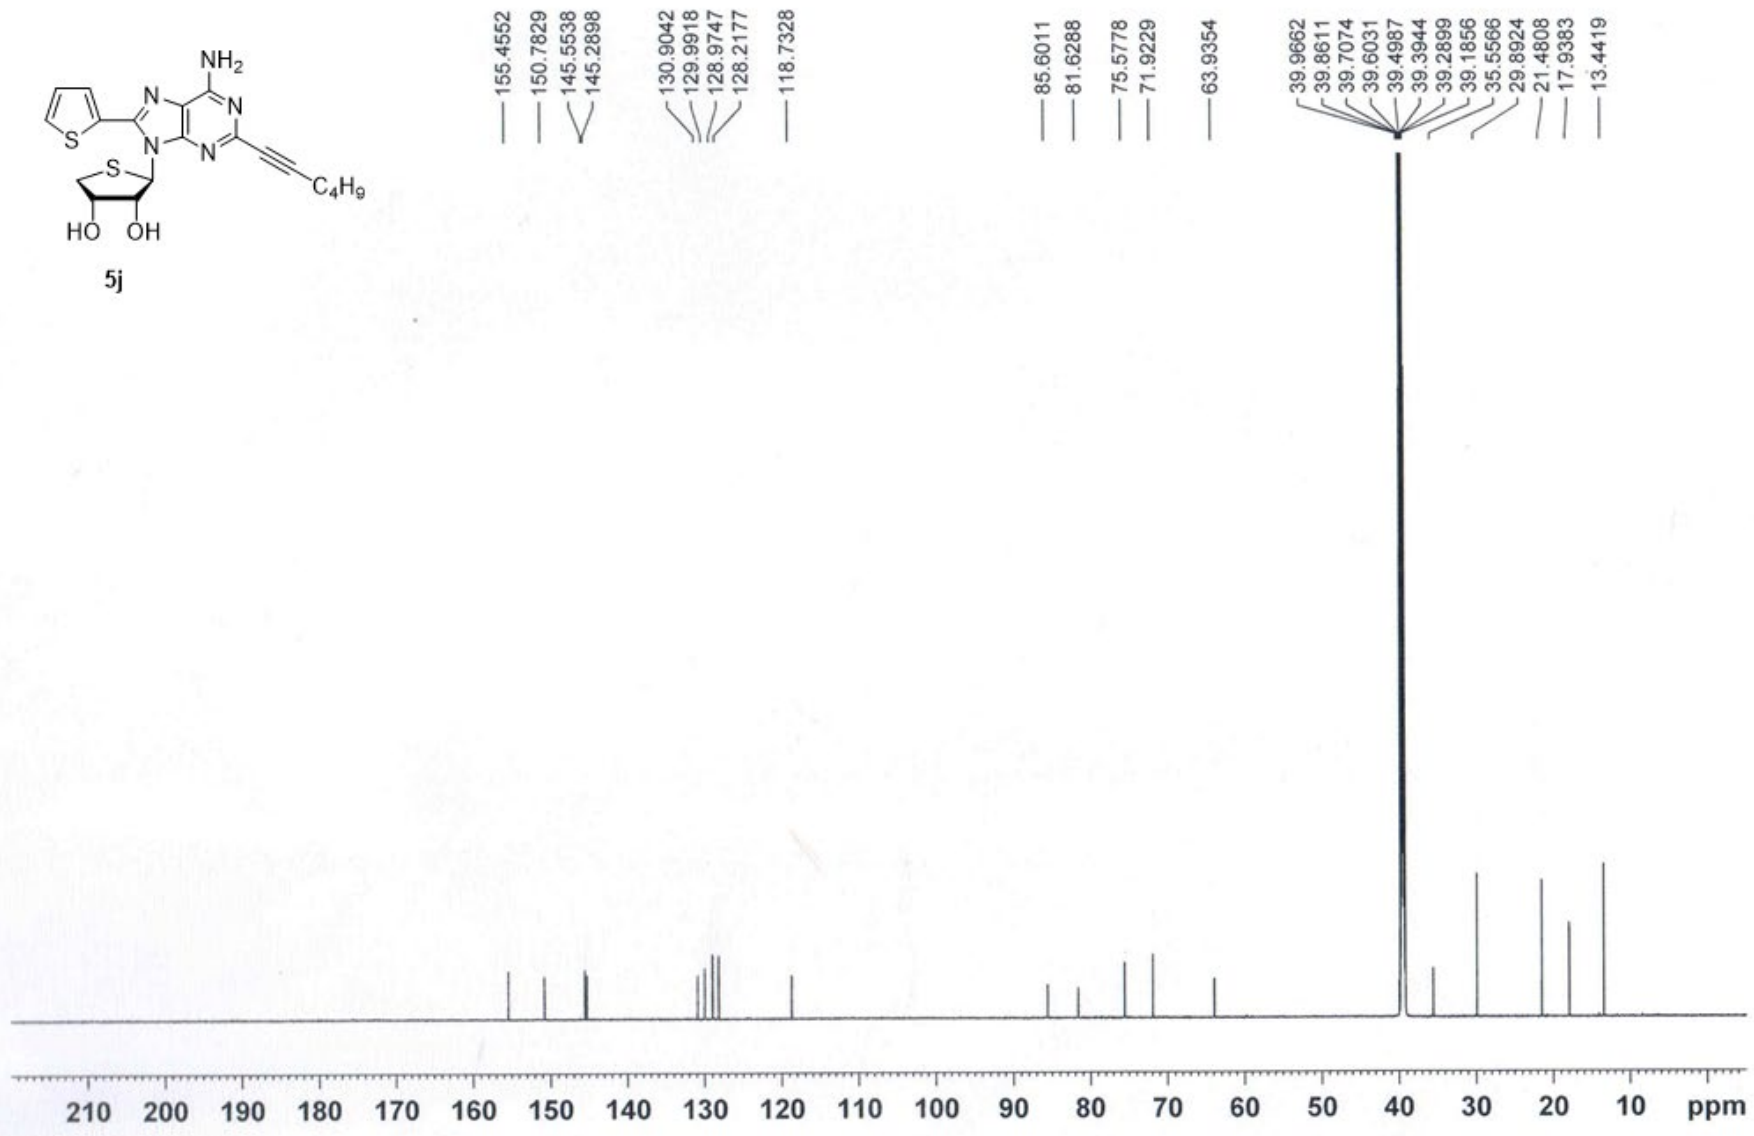

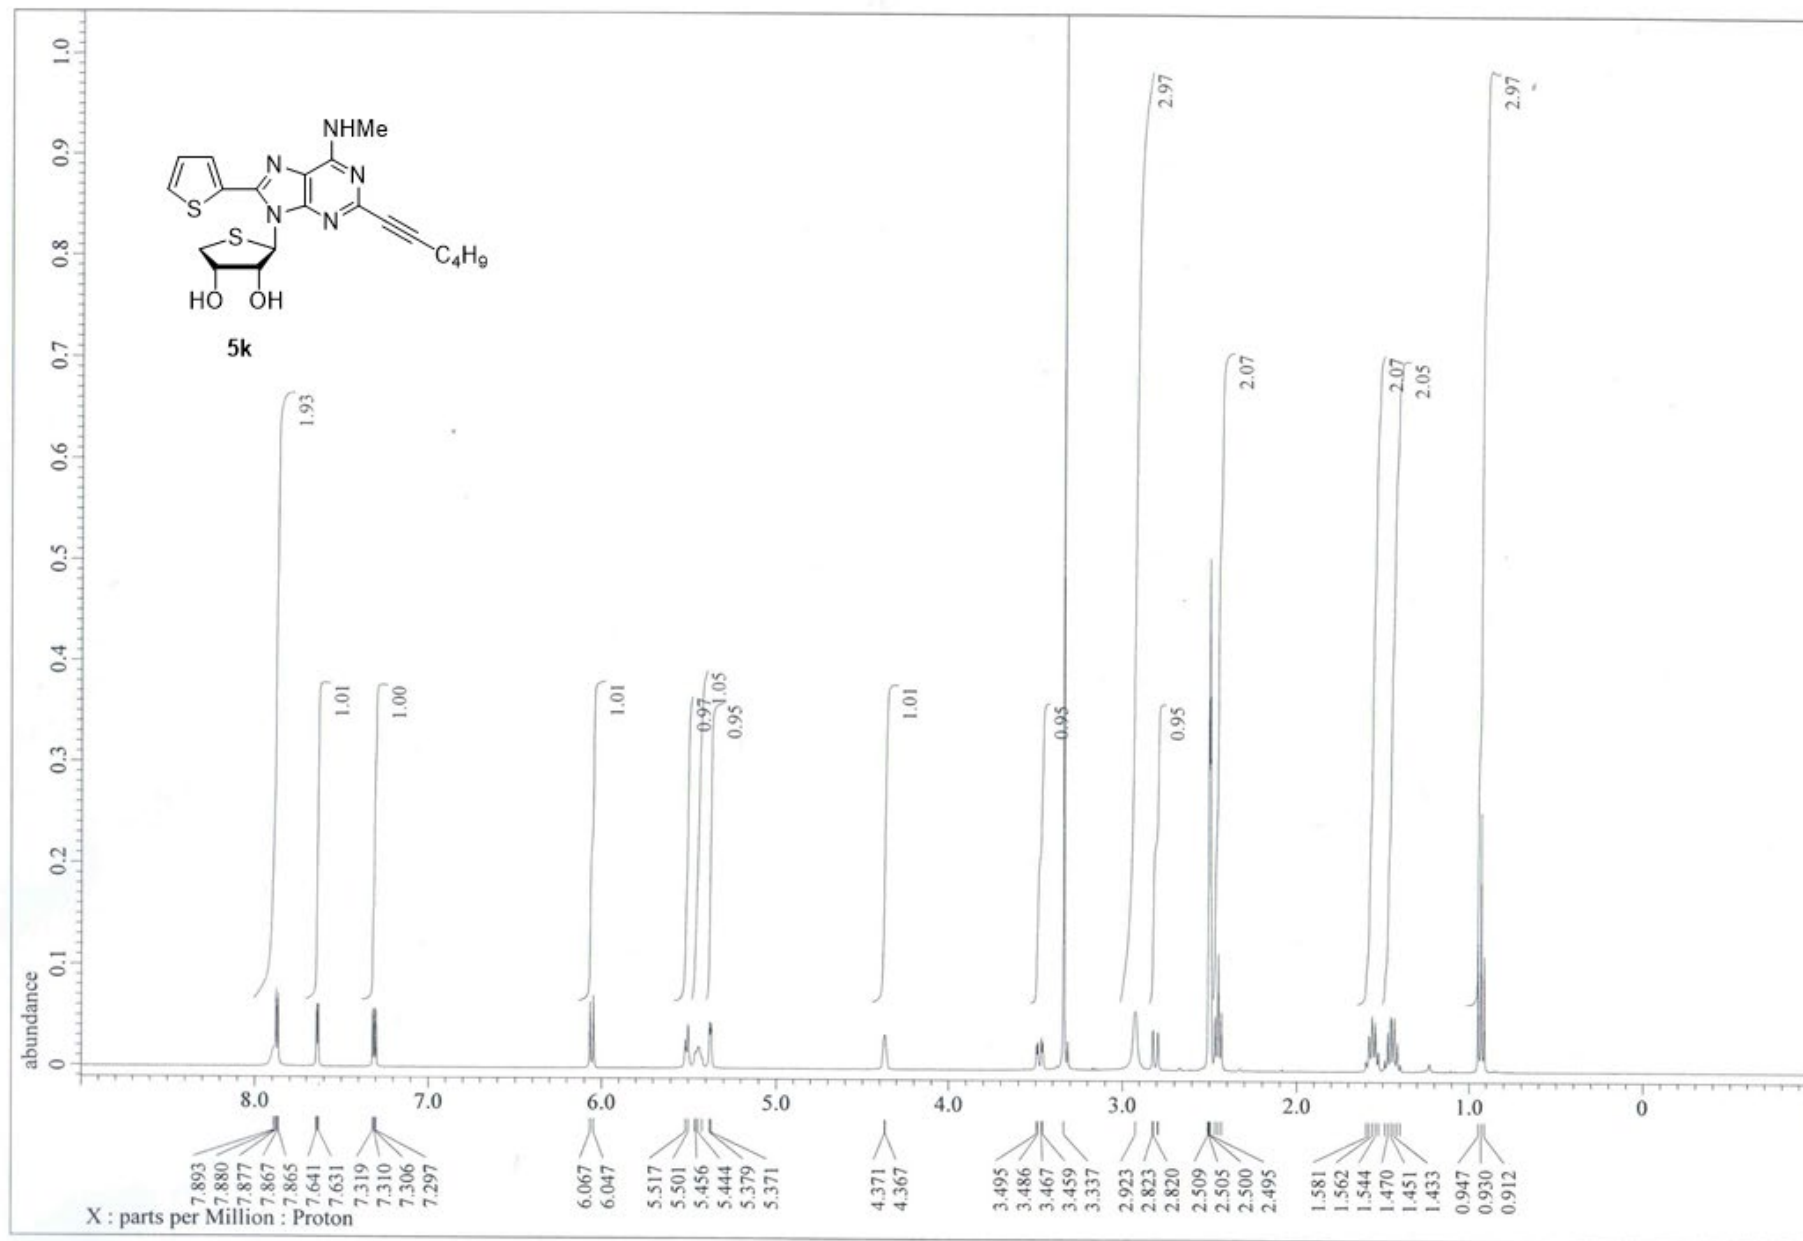

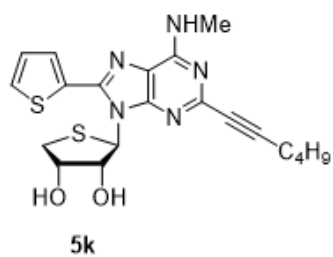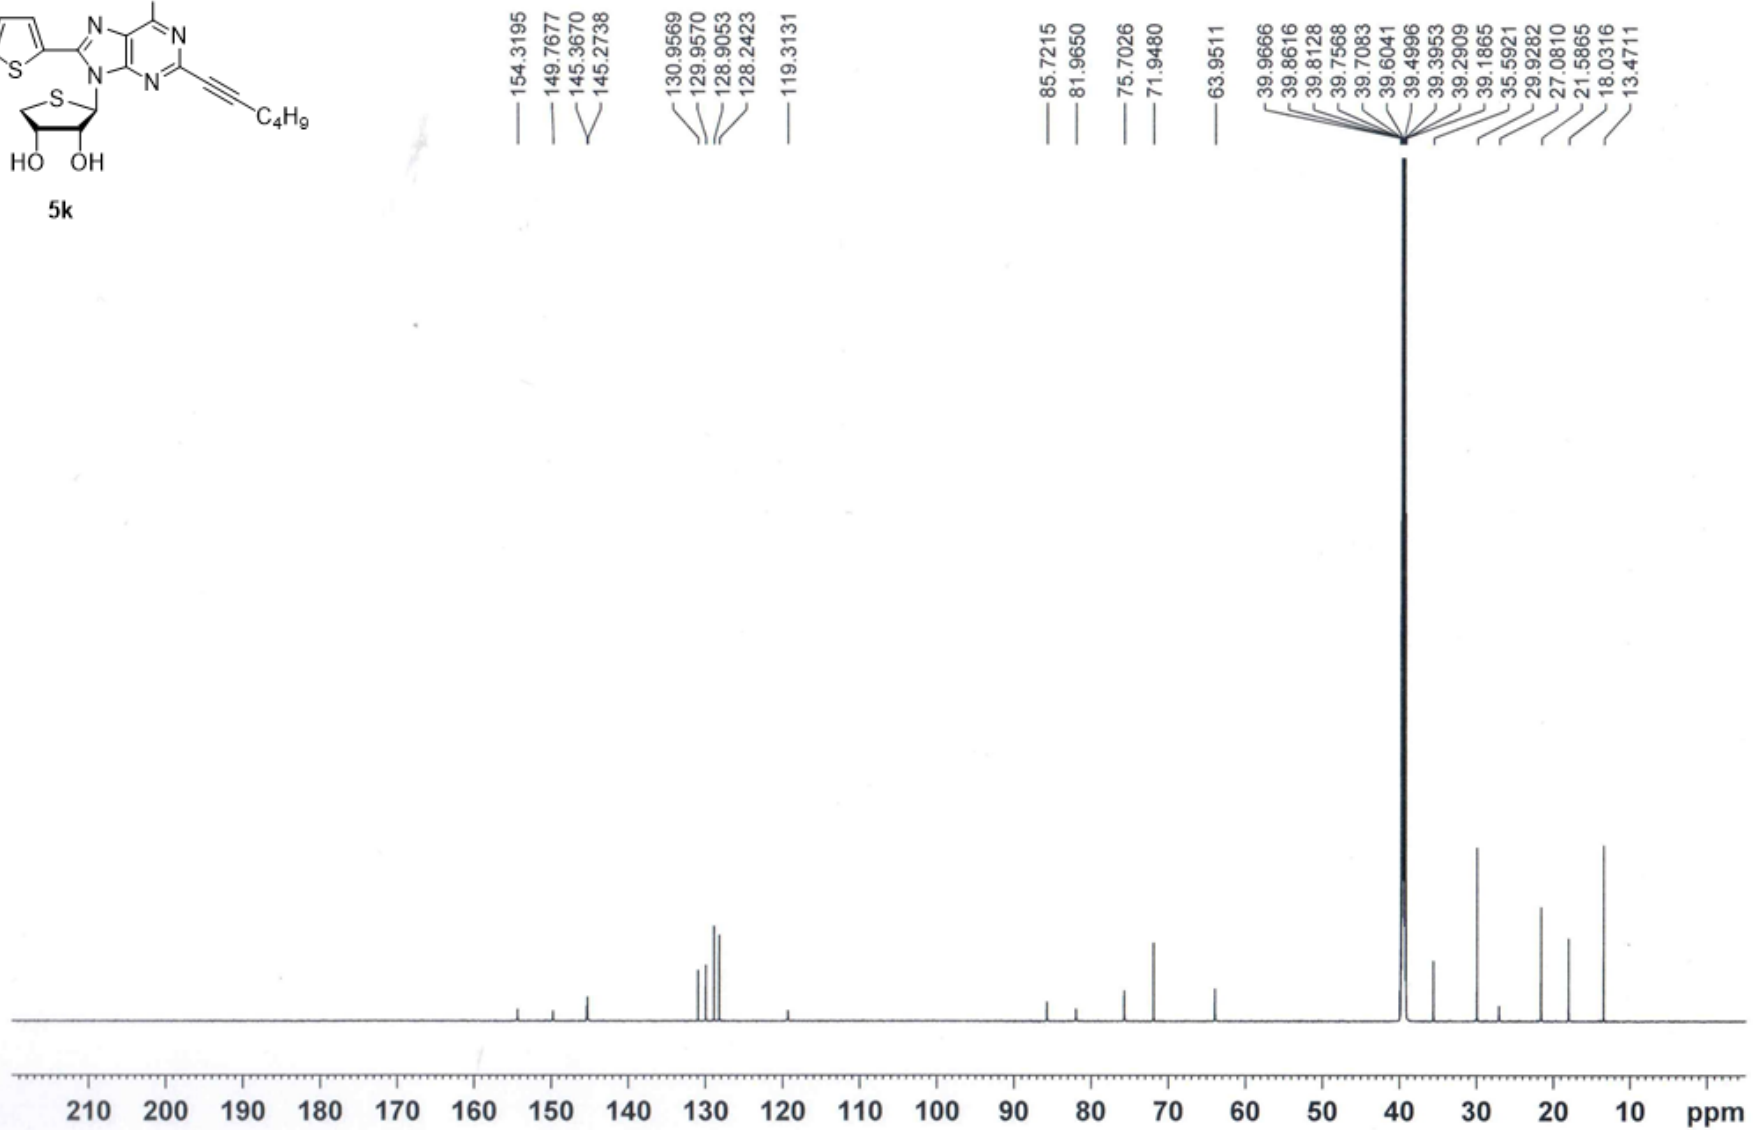

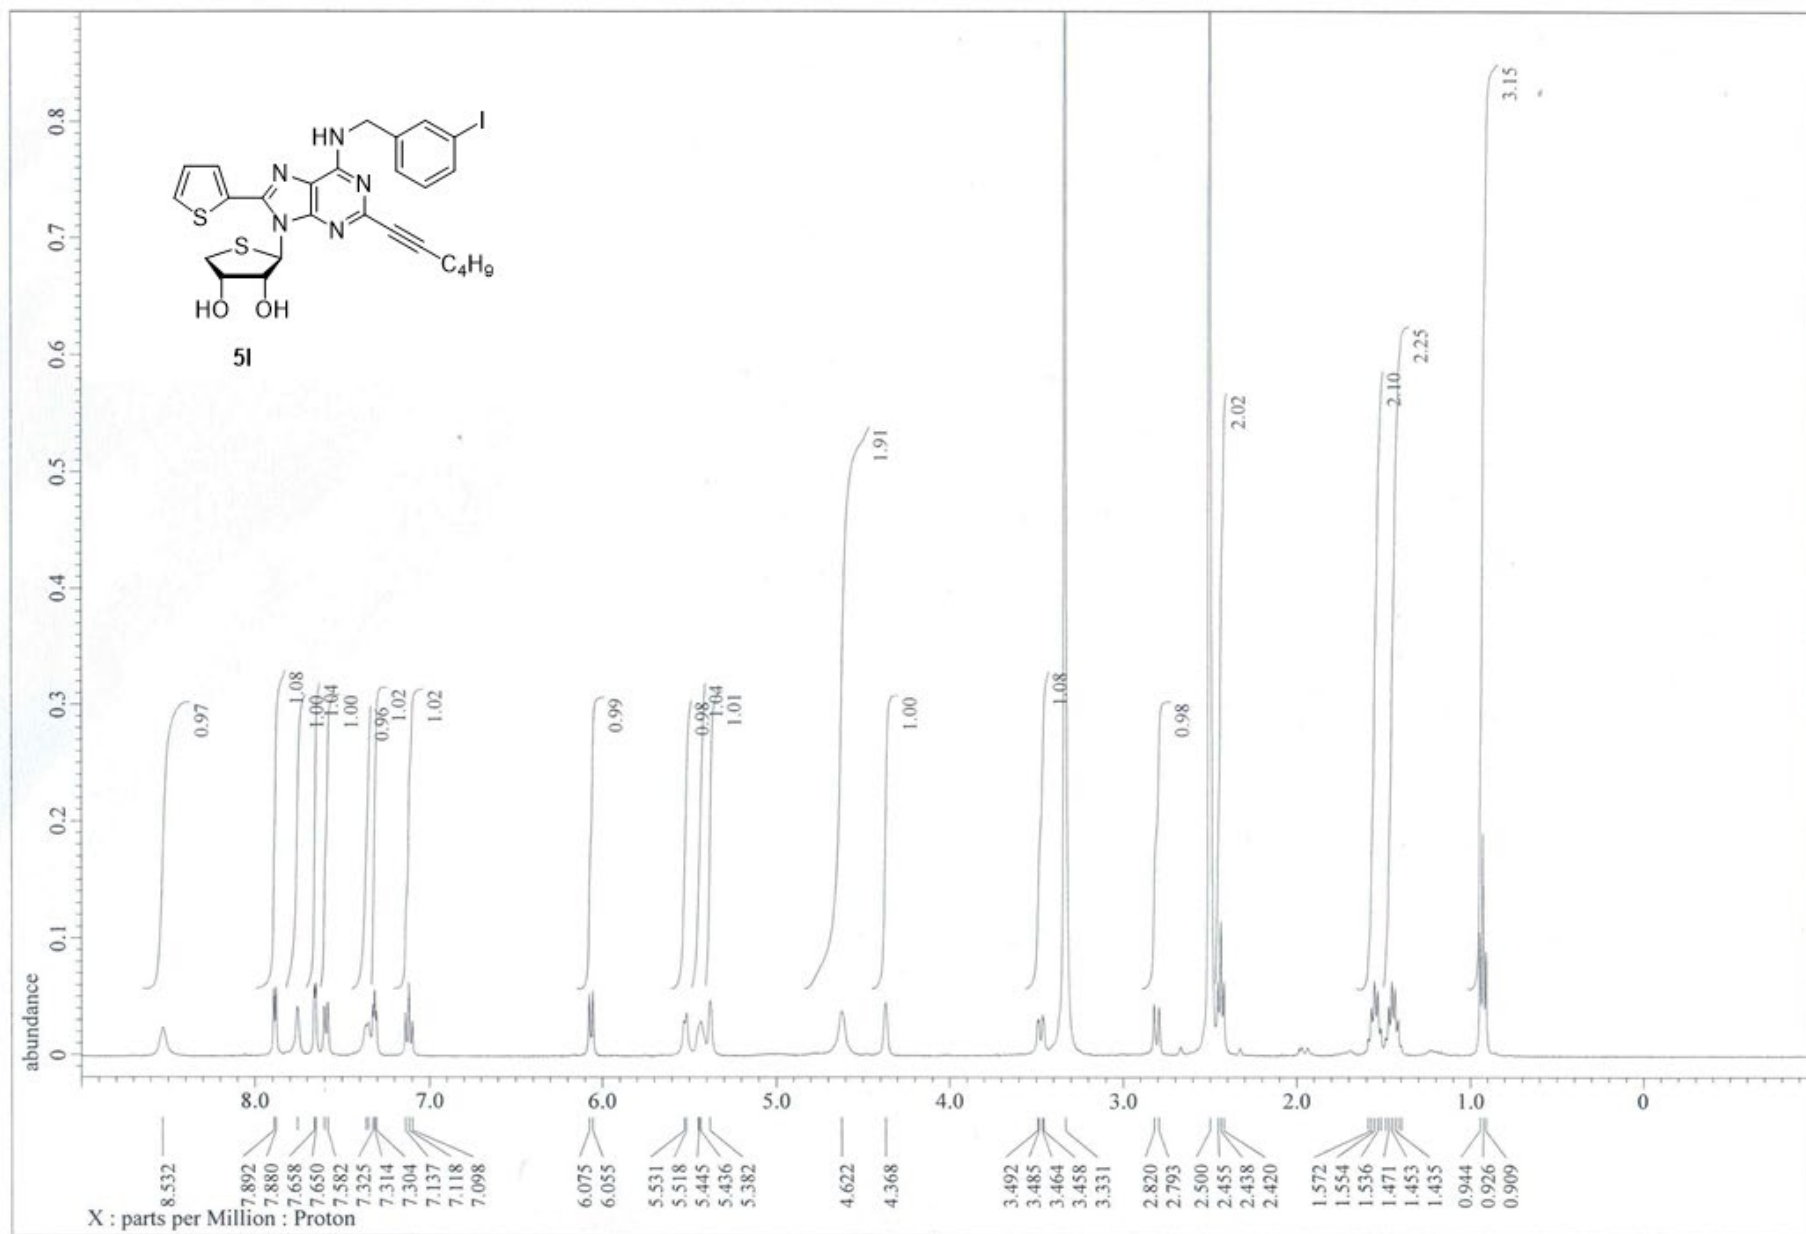

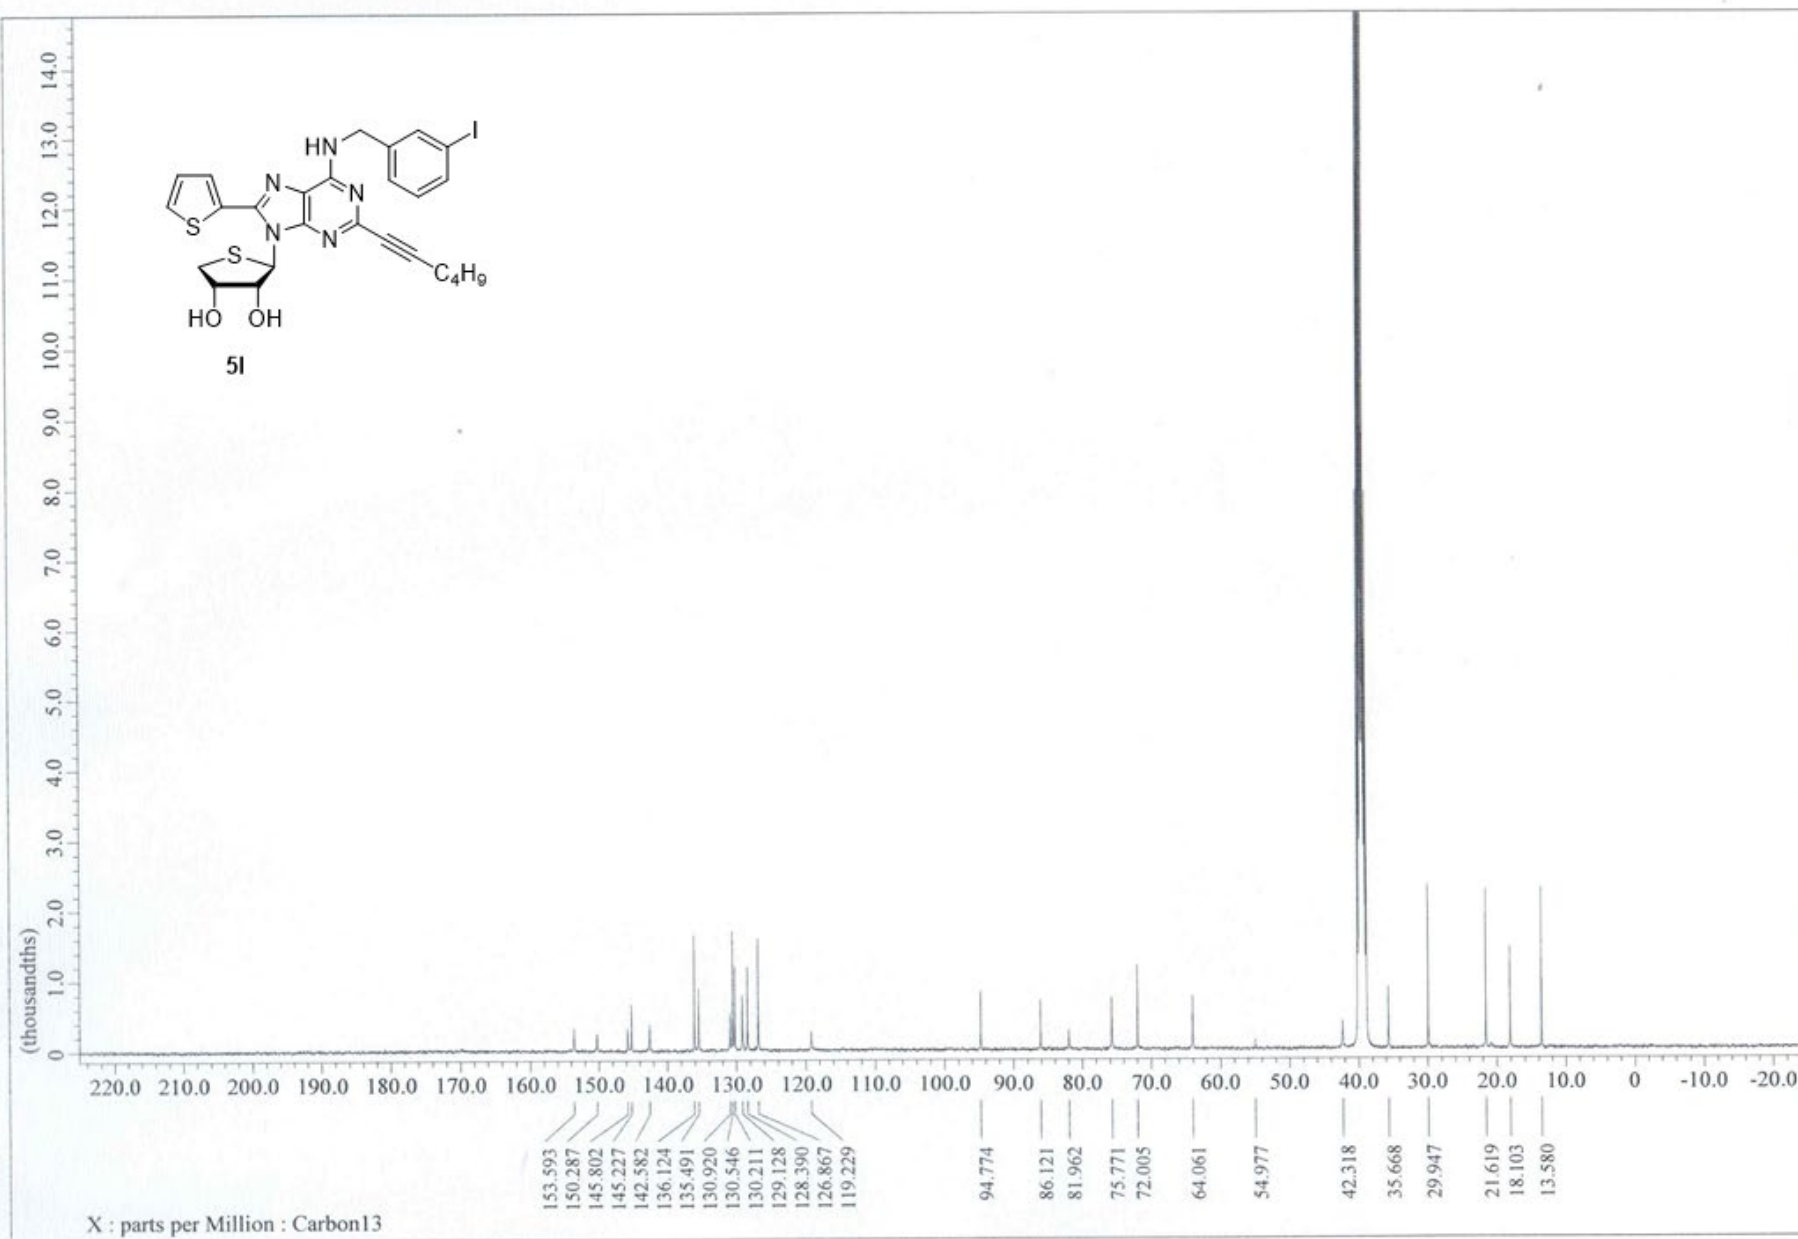

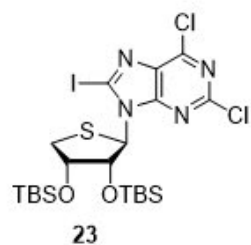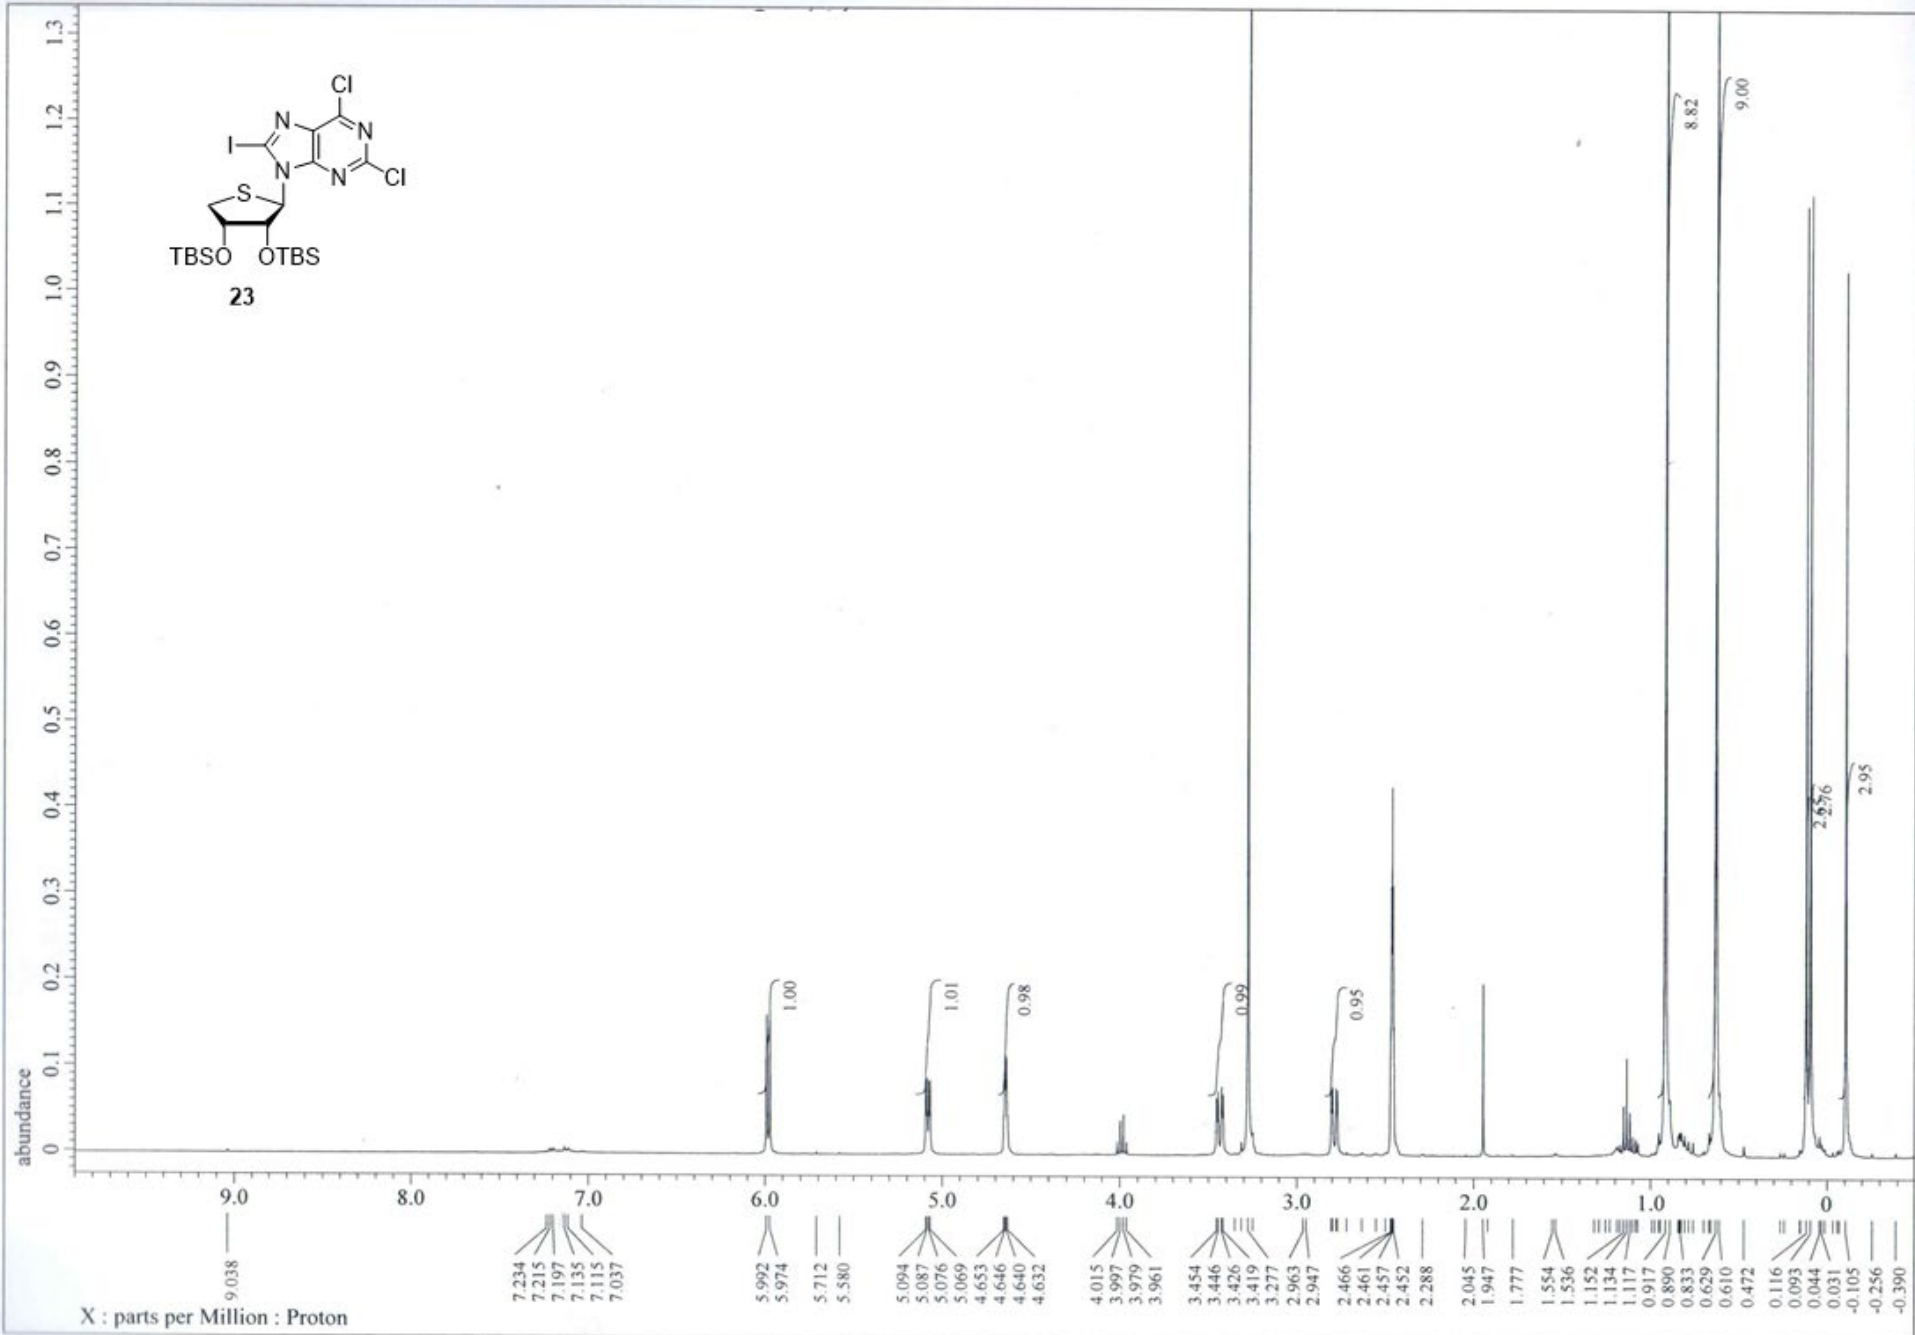



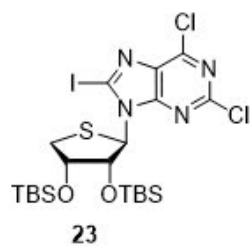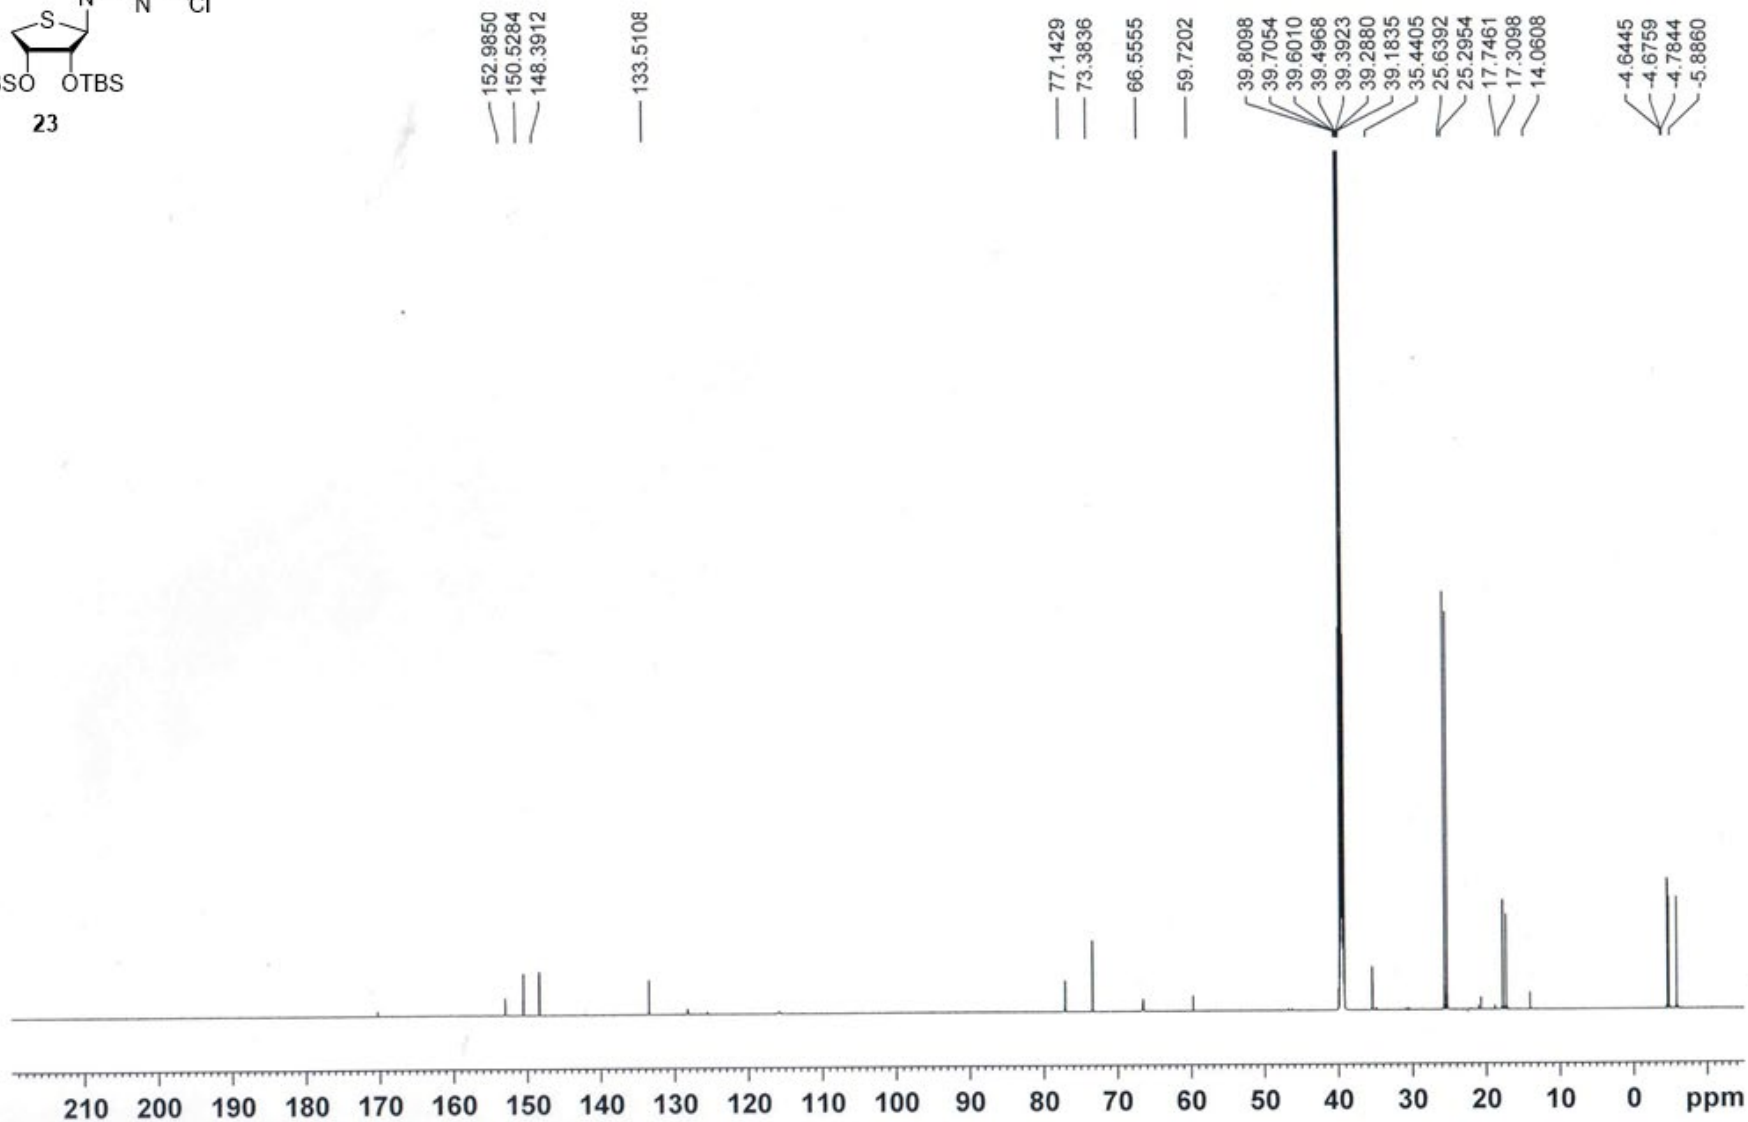

EA 190.31

128.2

EA 52.74

EA 20.68

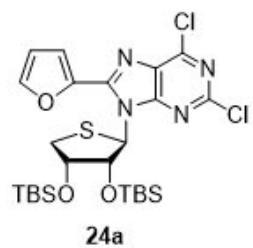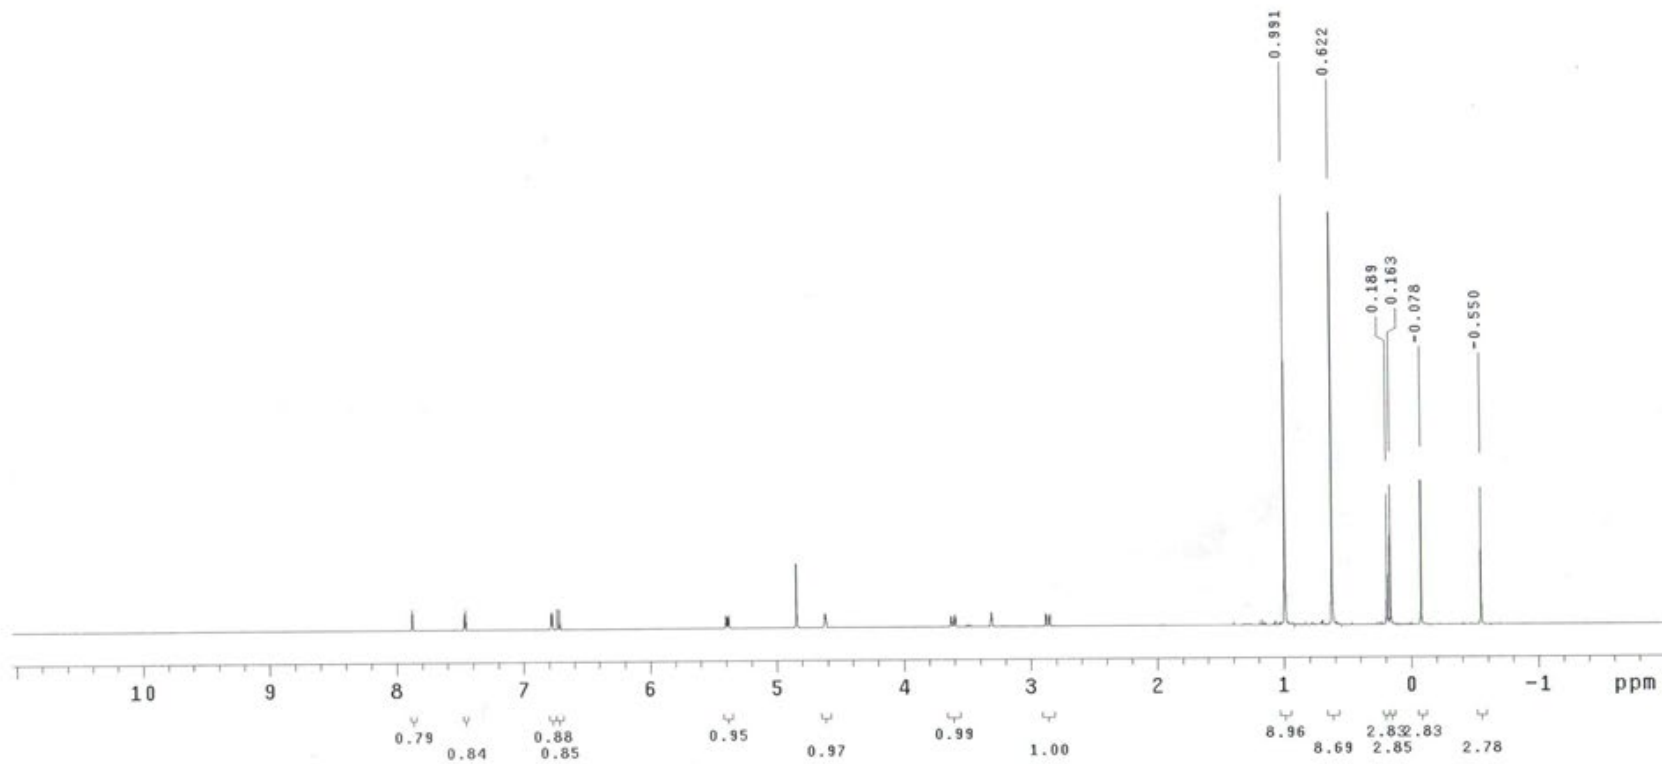

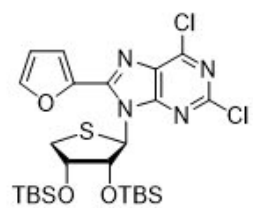

24a

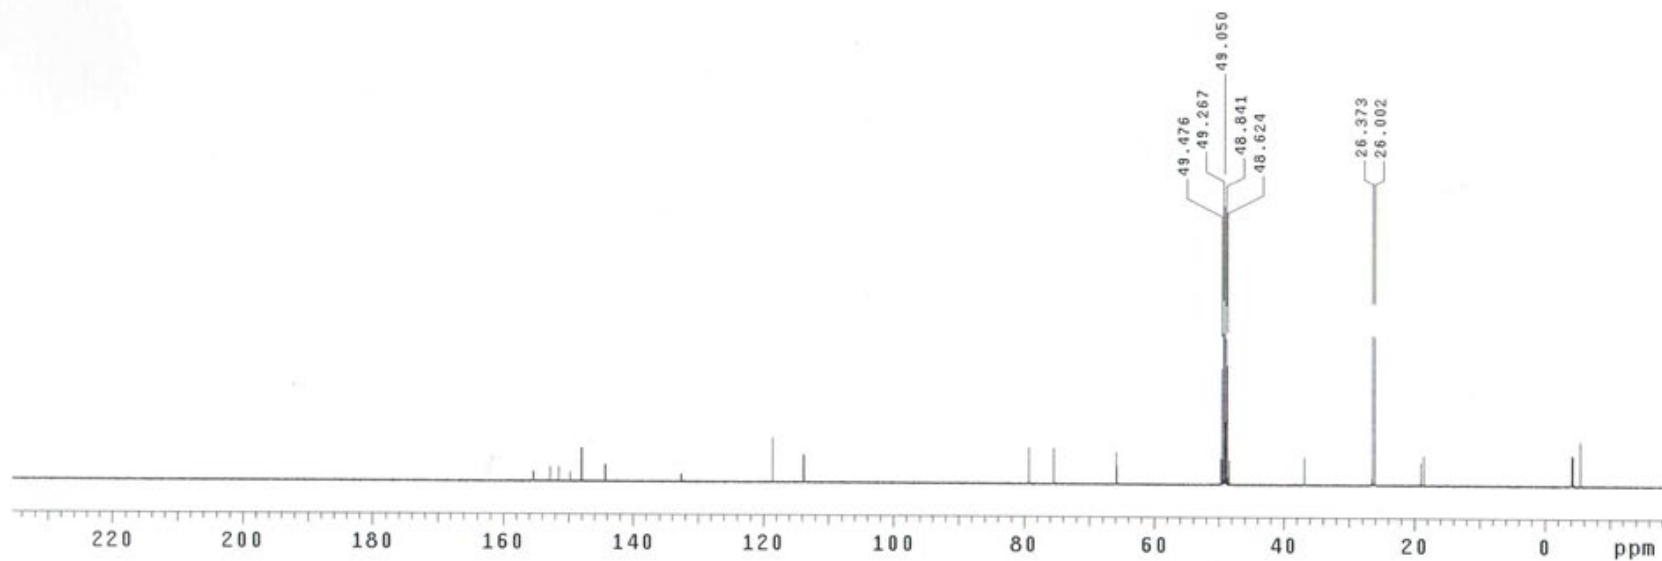

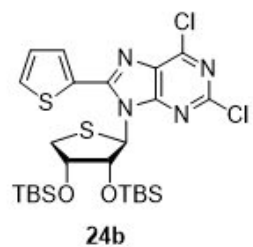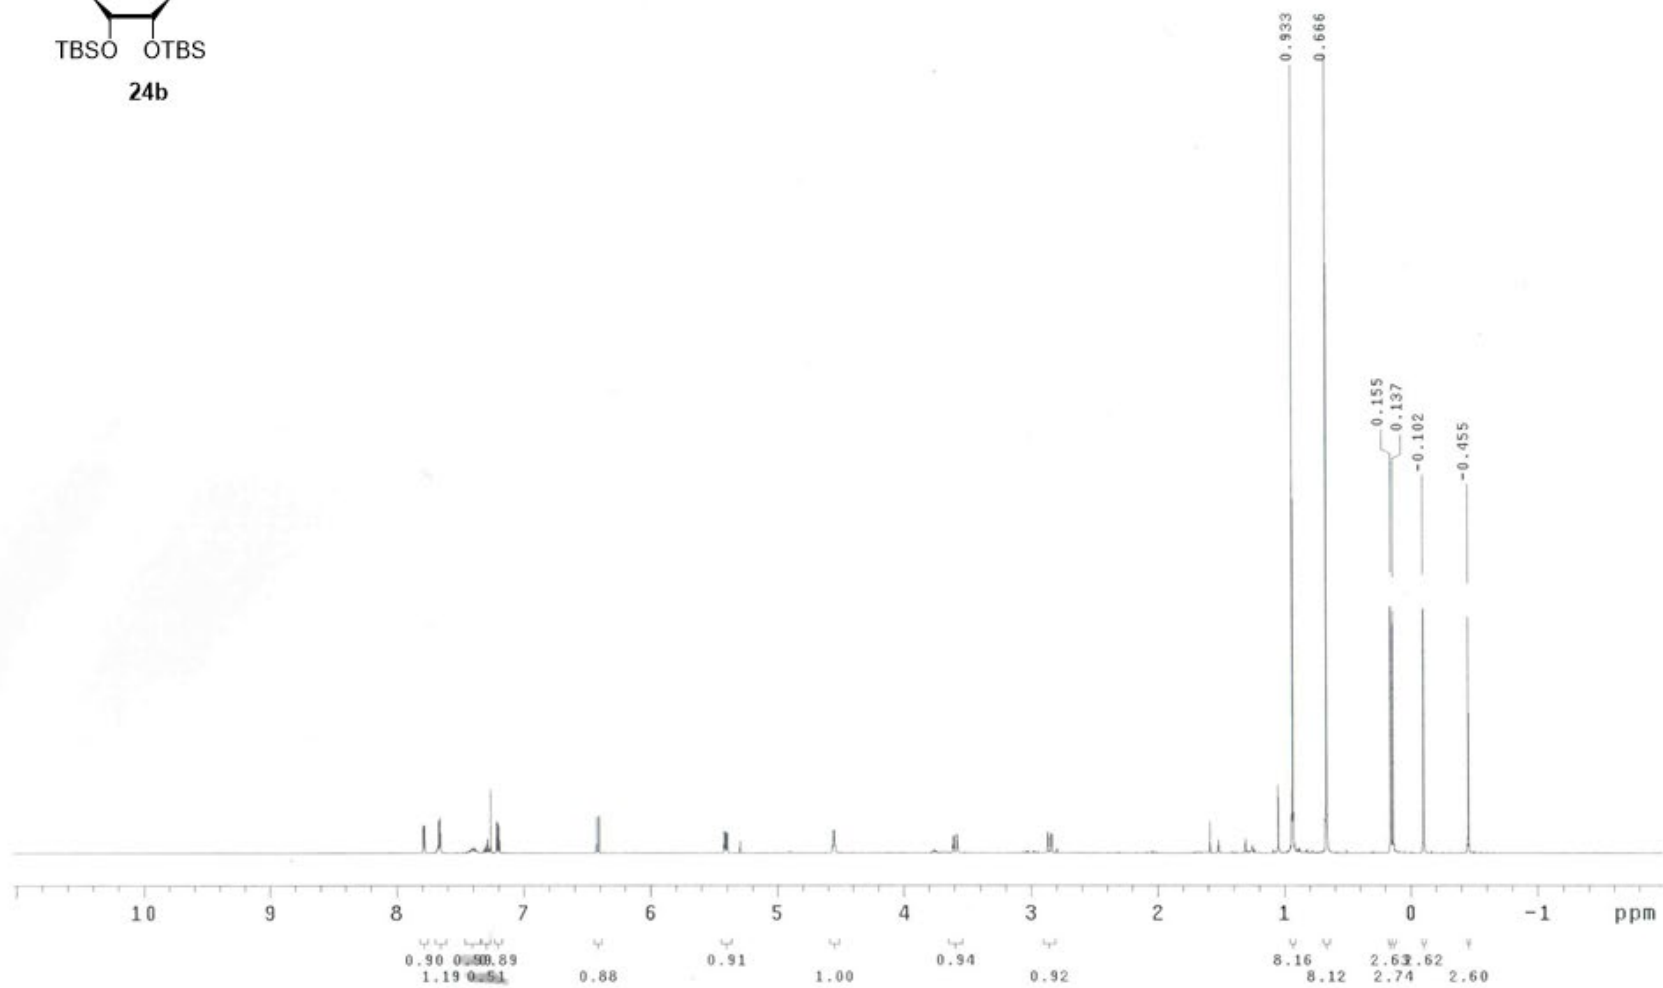

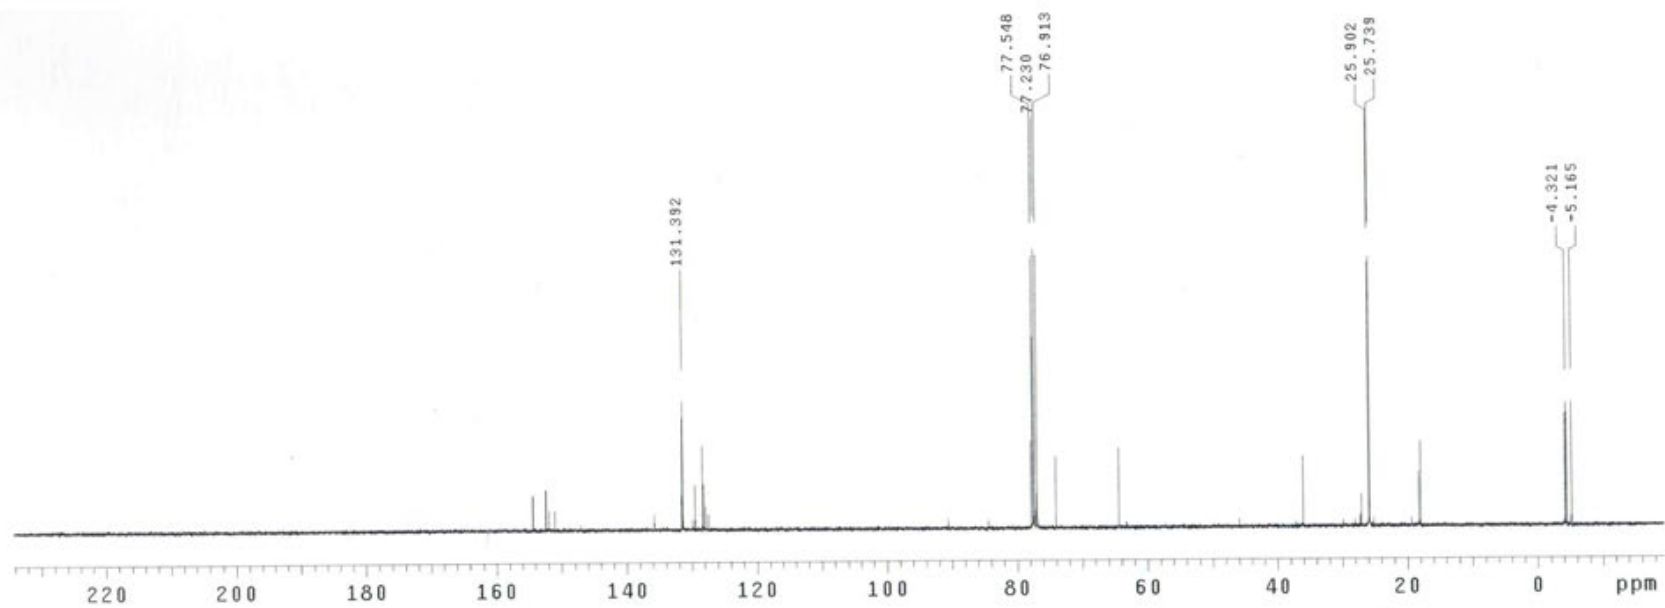

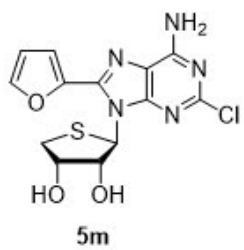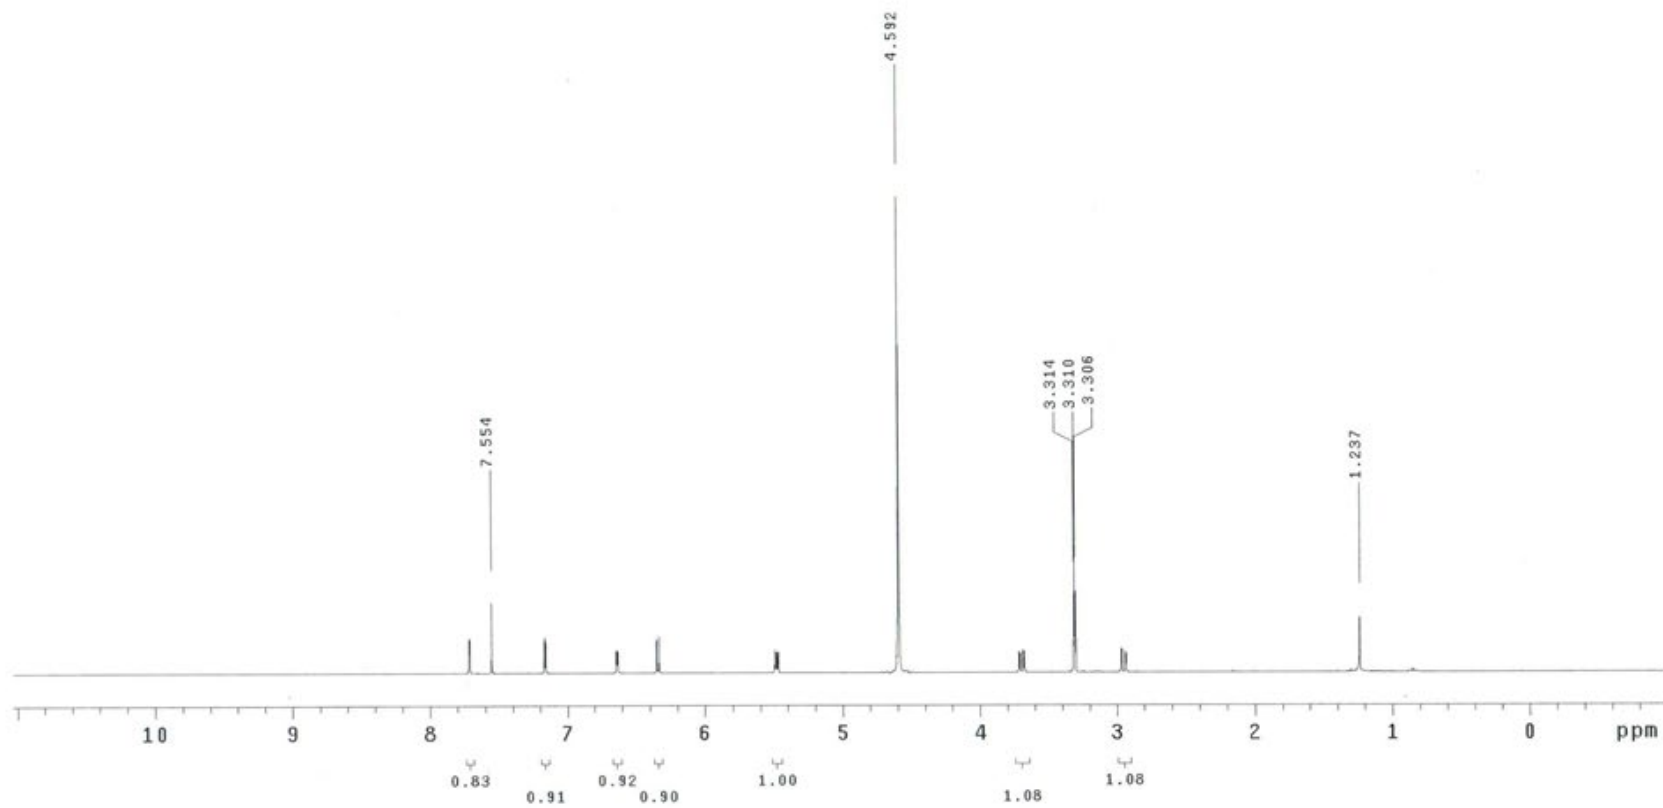

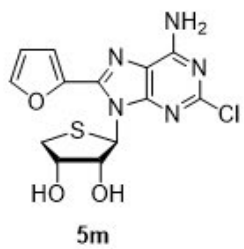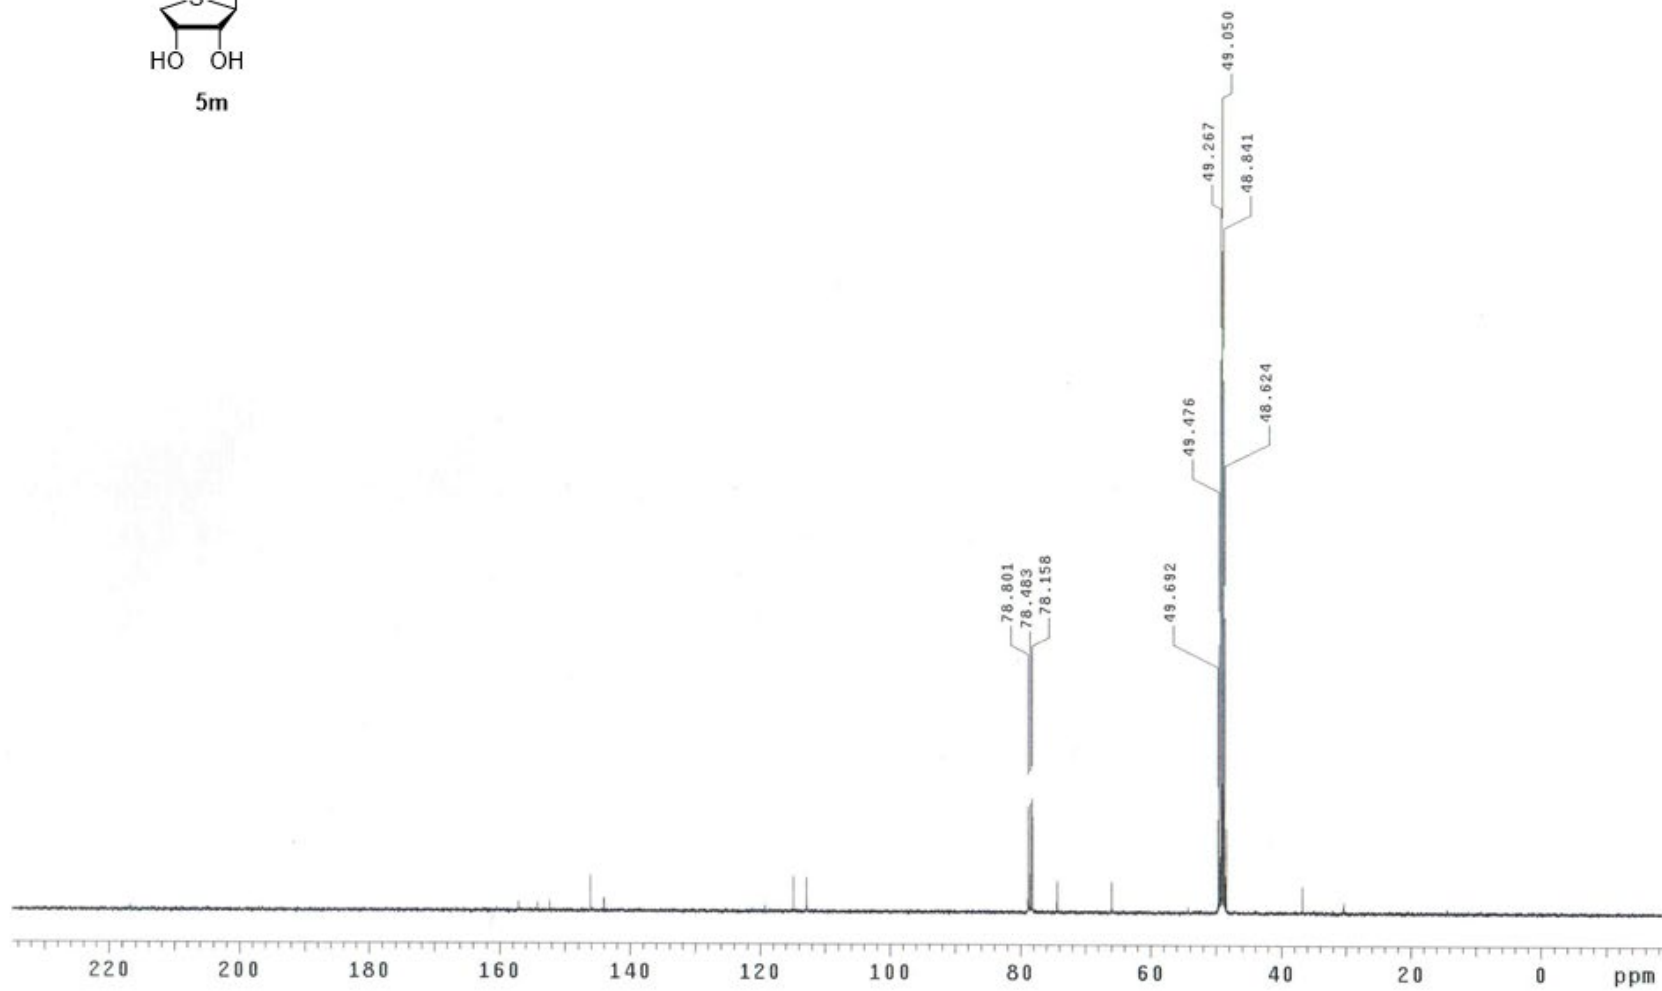

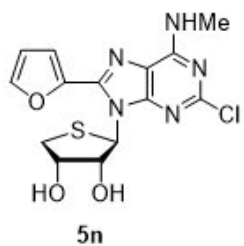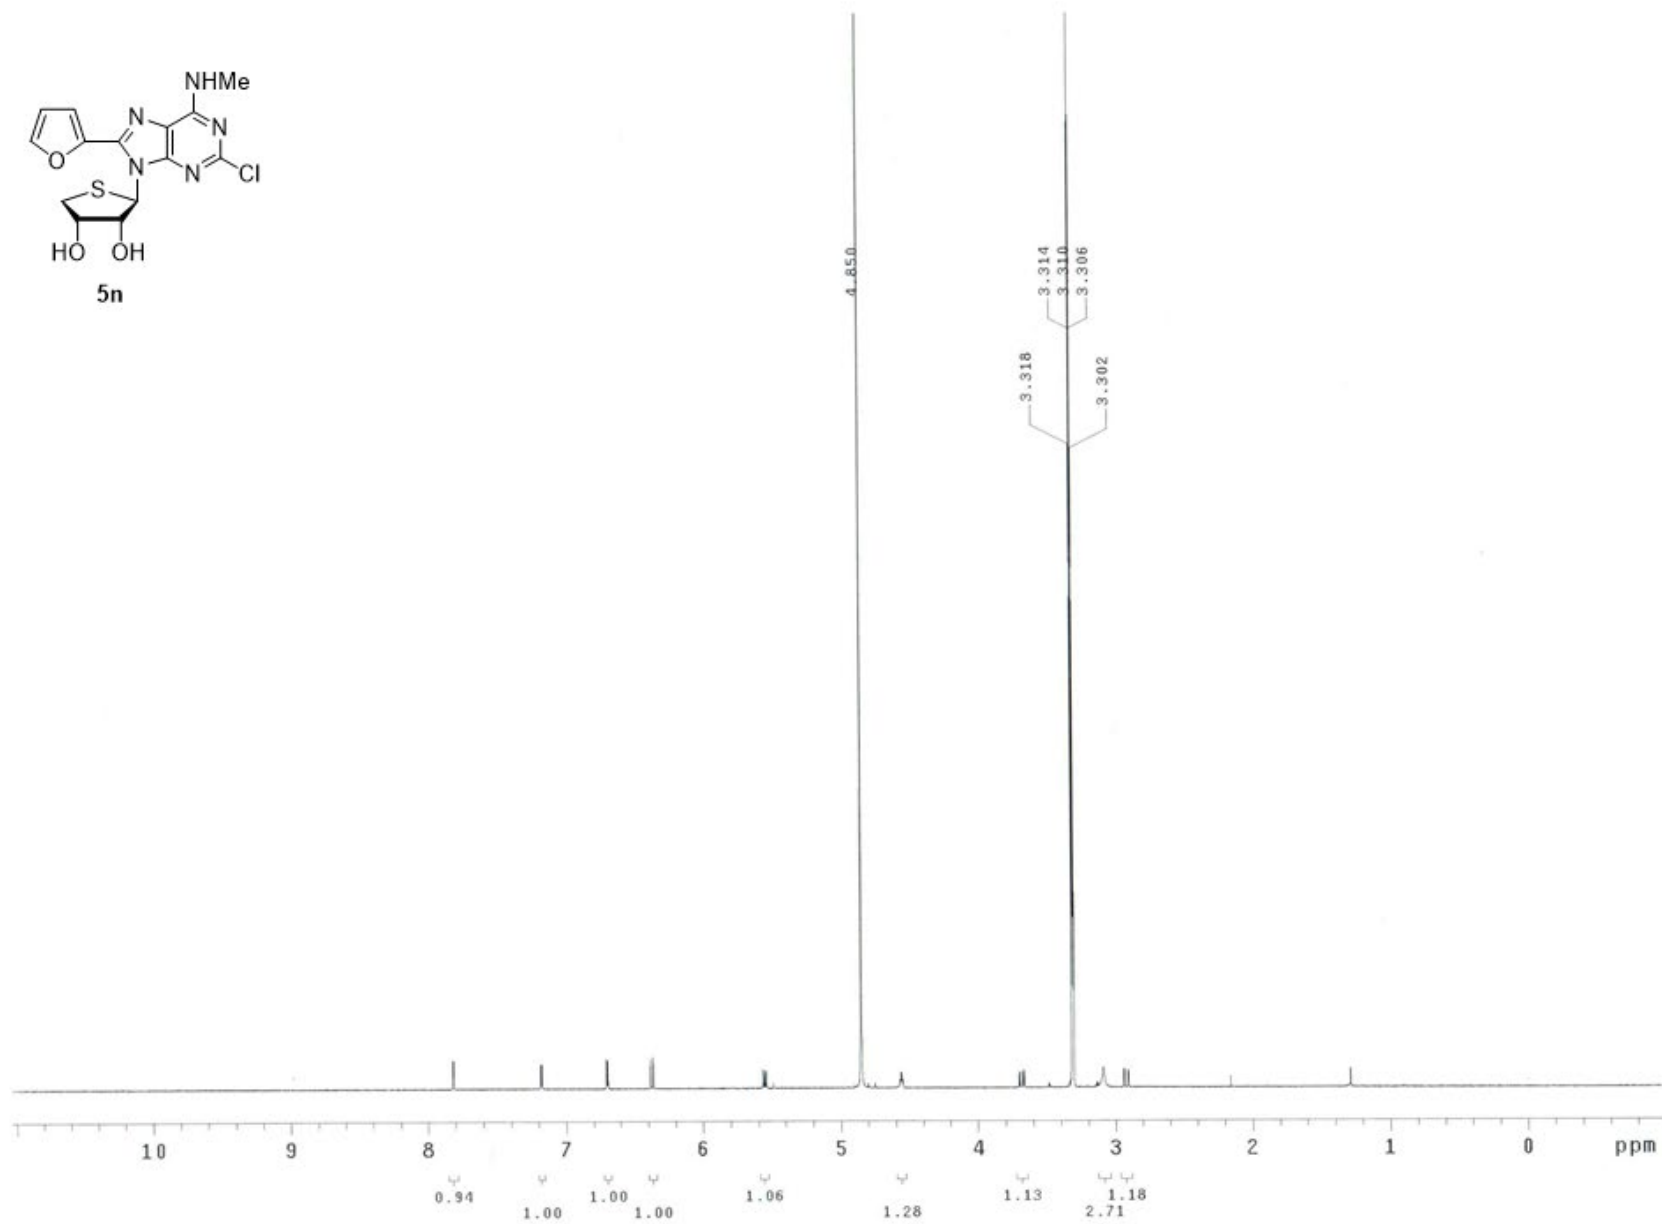



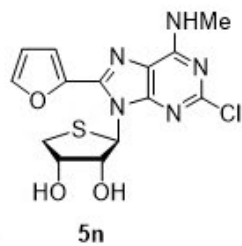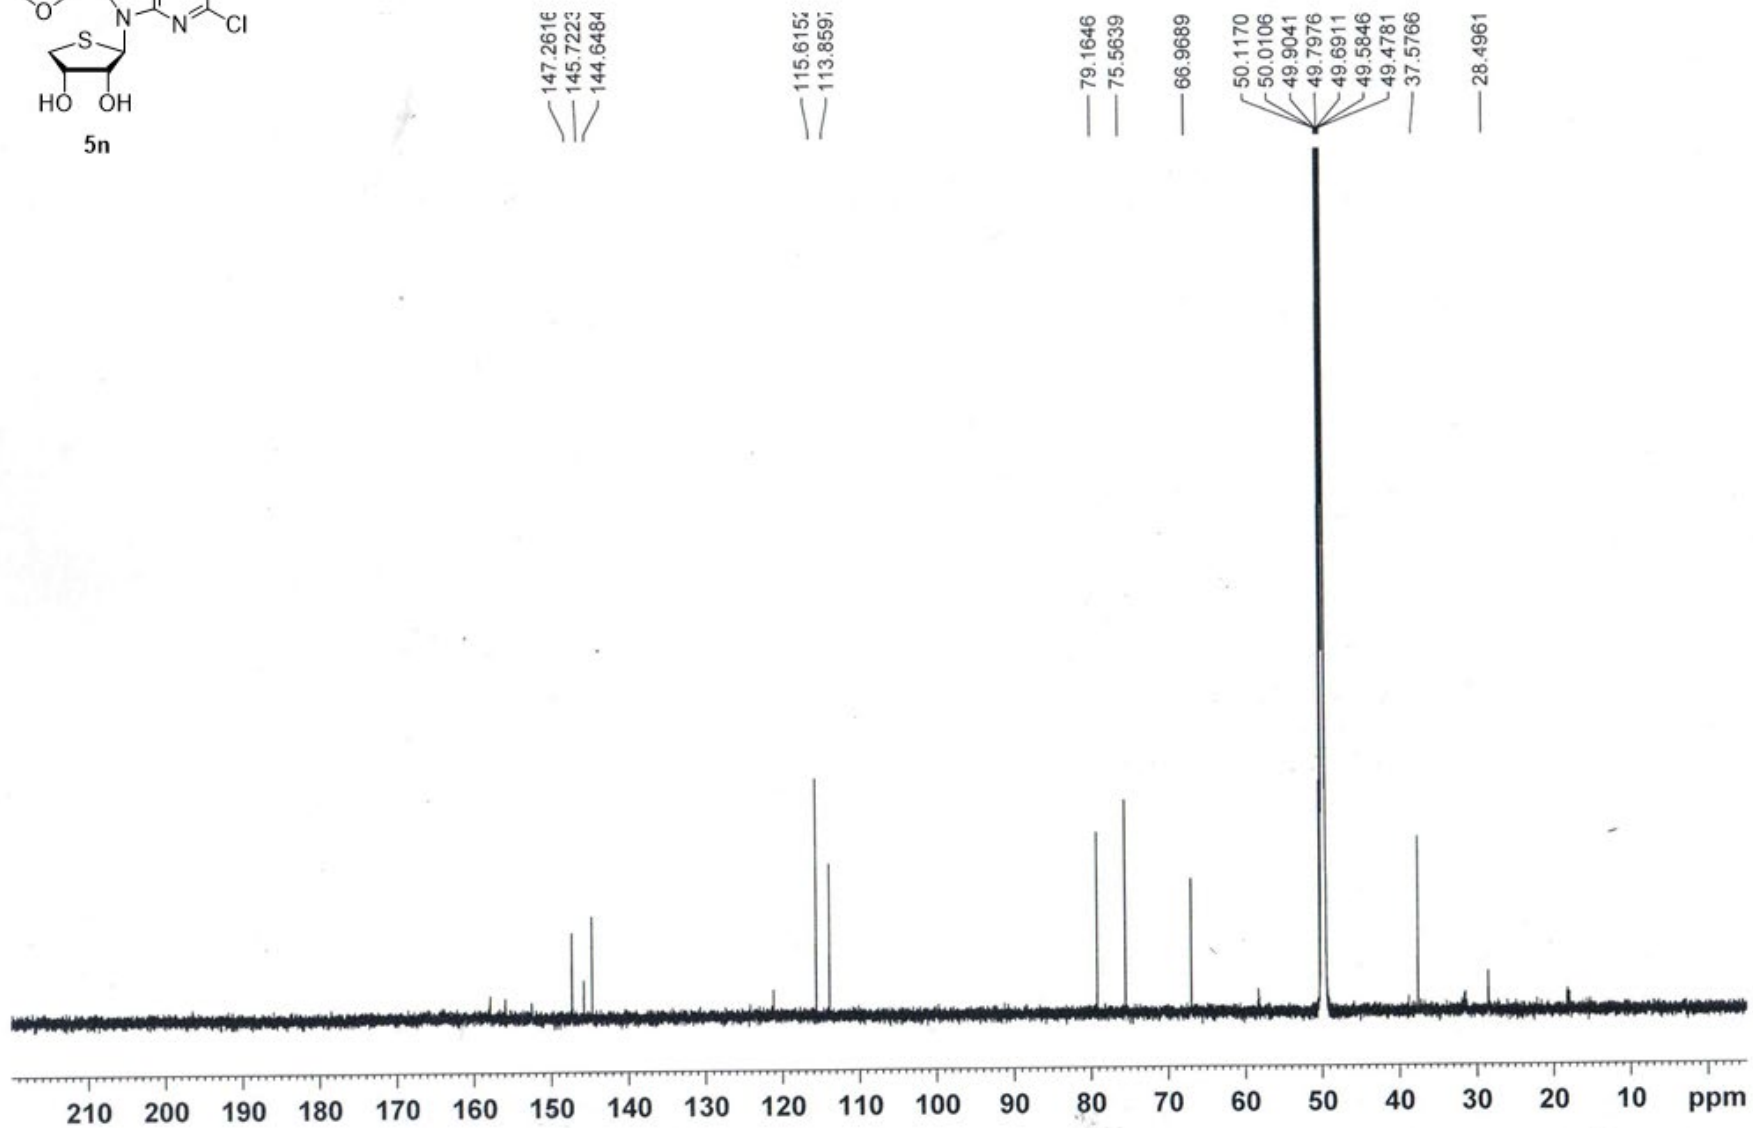

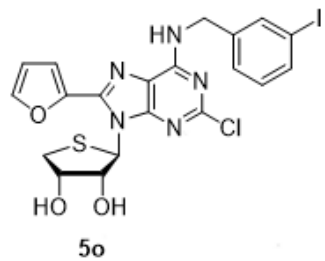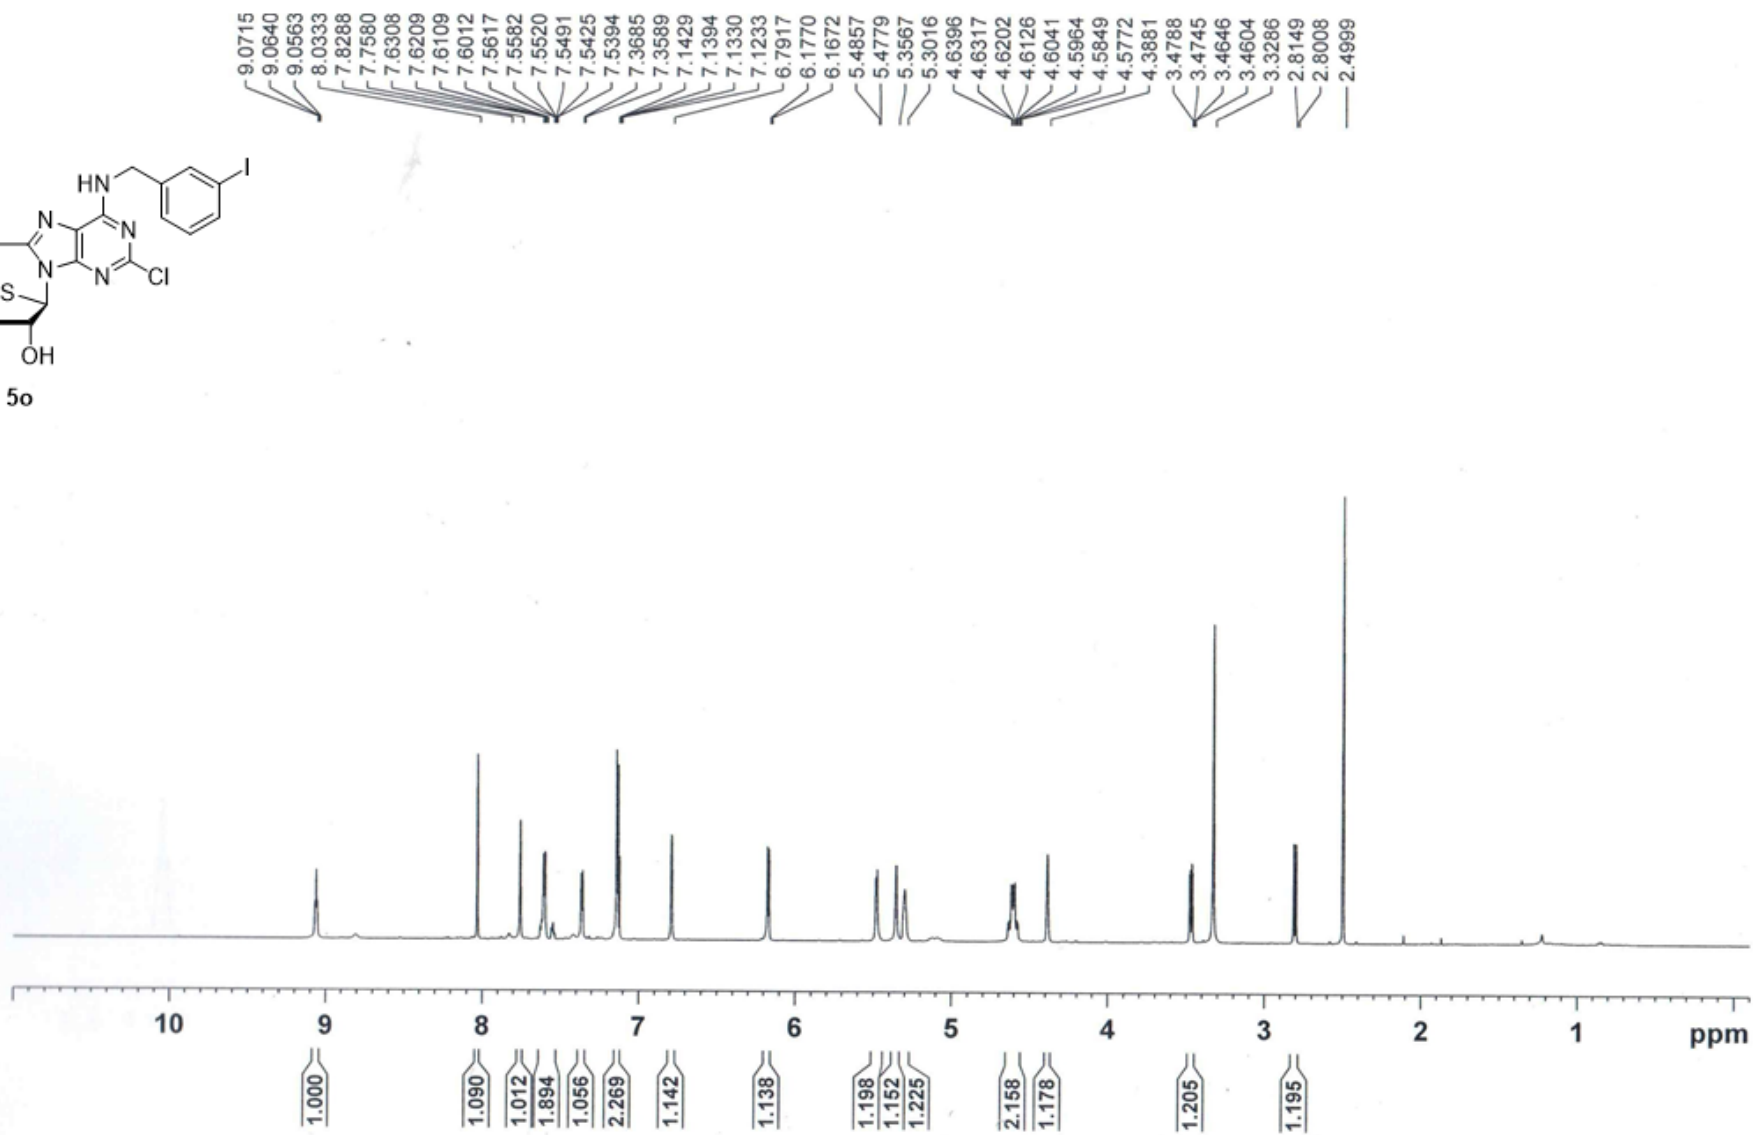

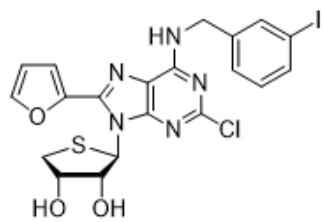

5o

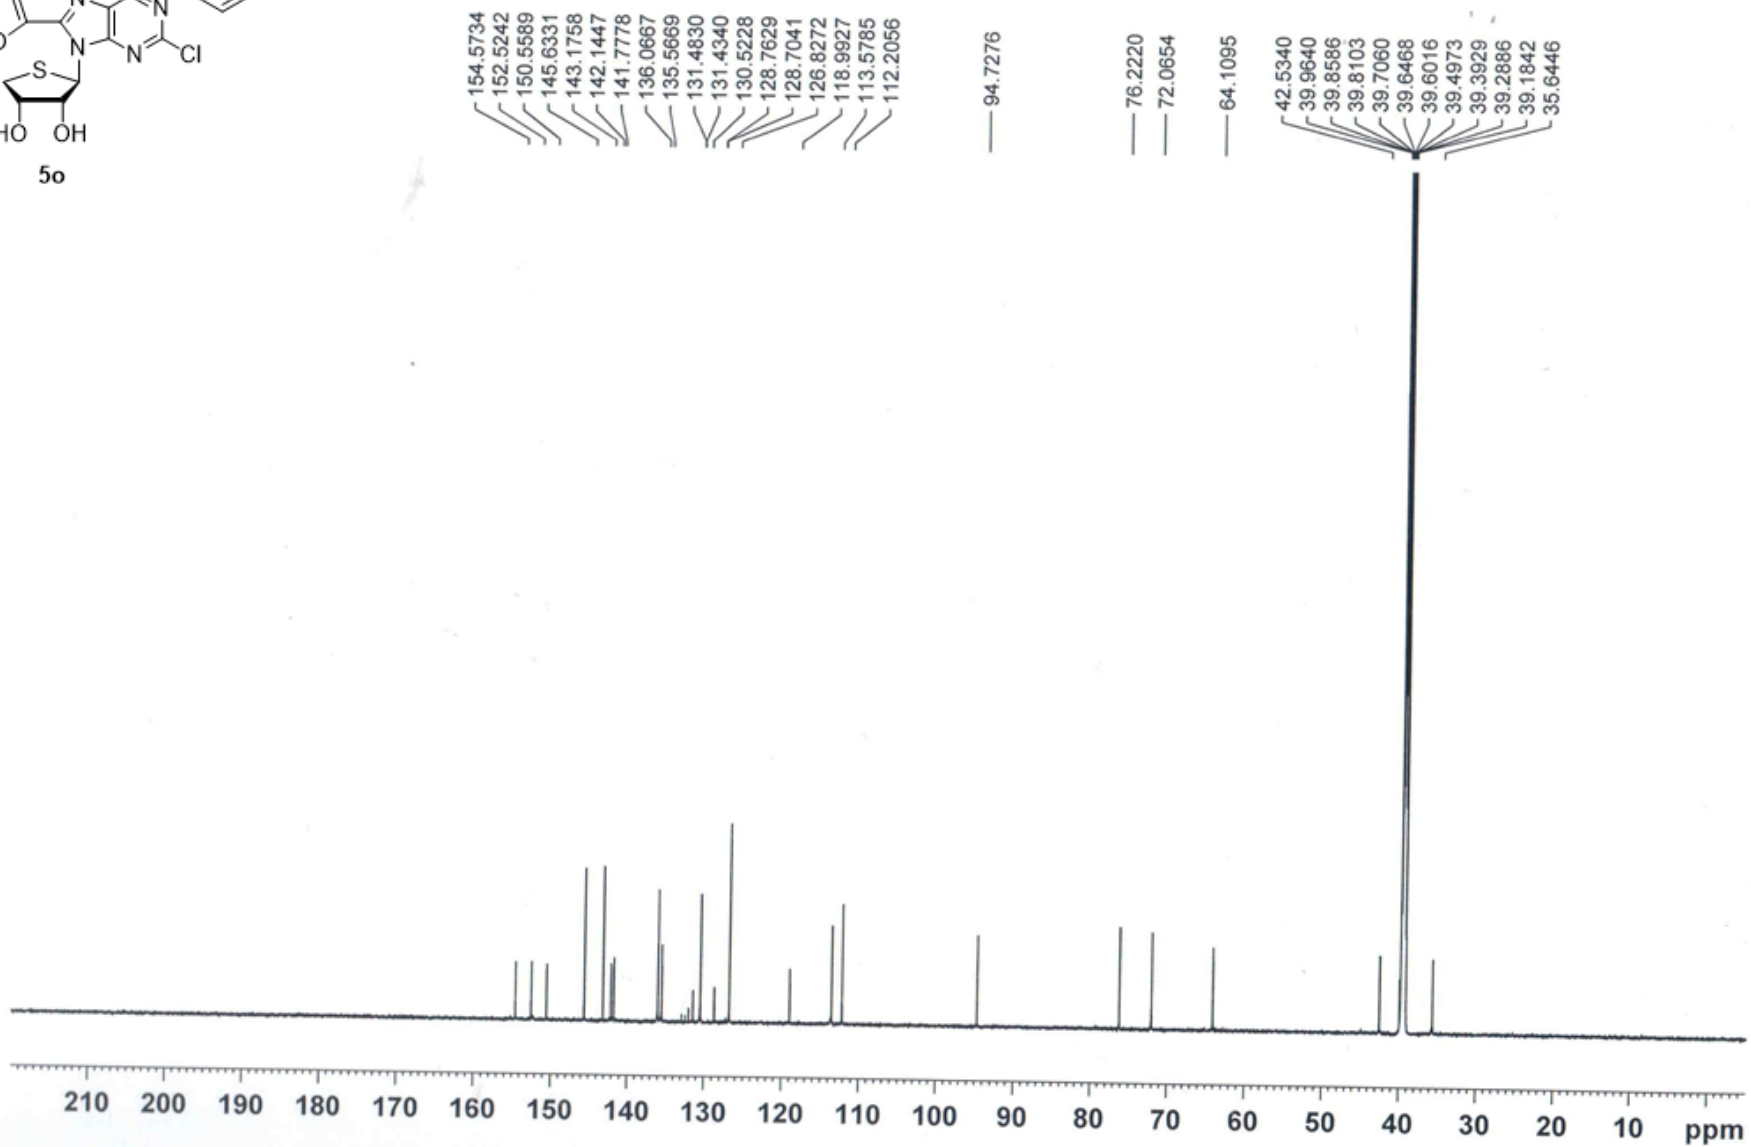

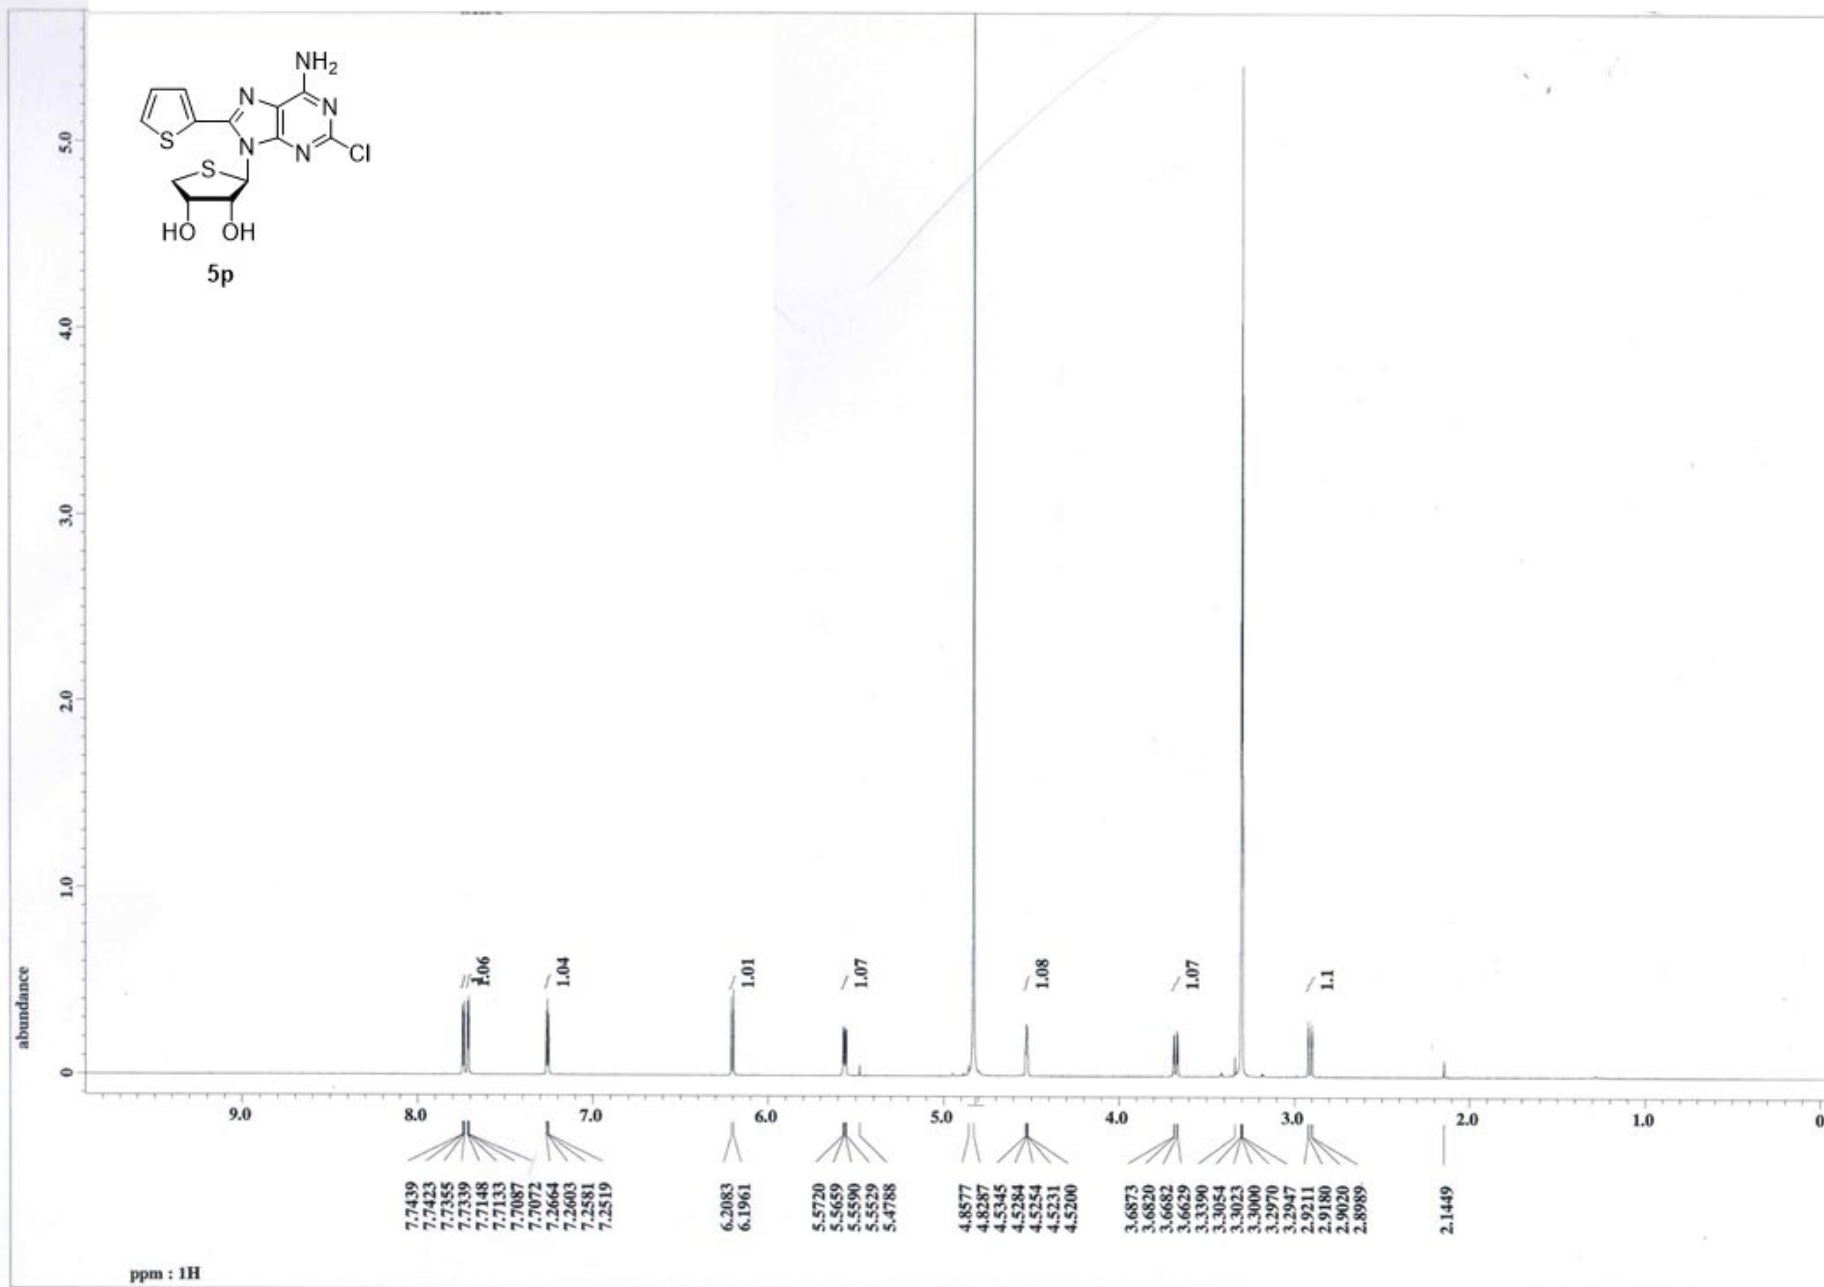

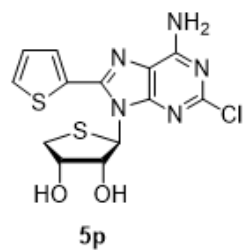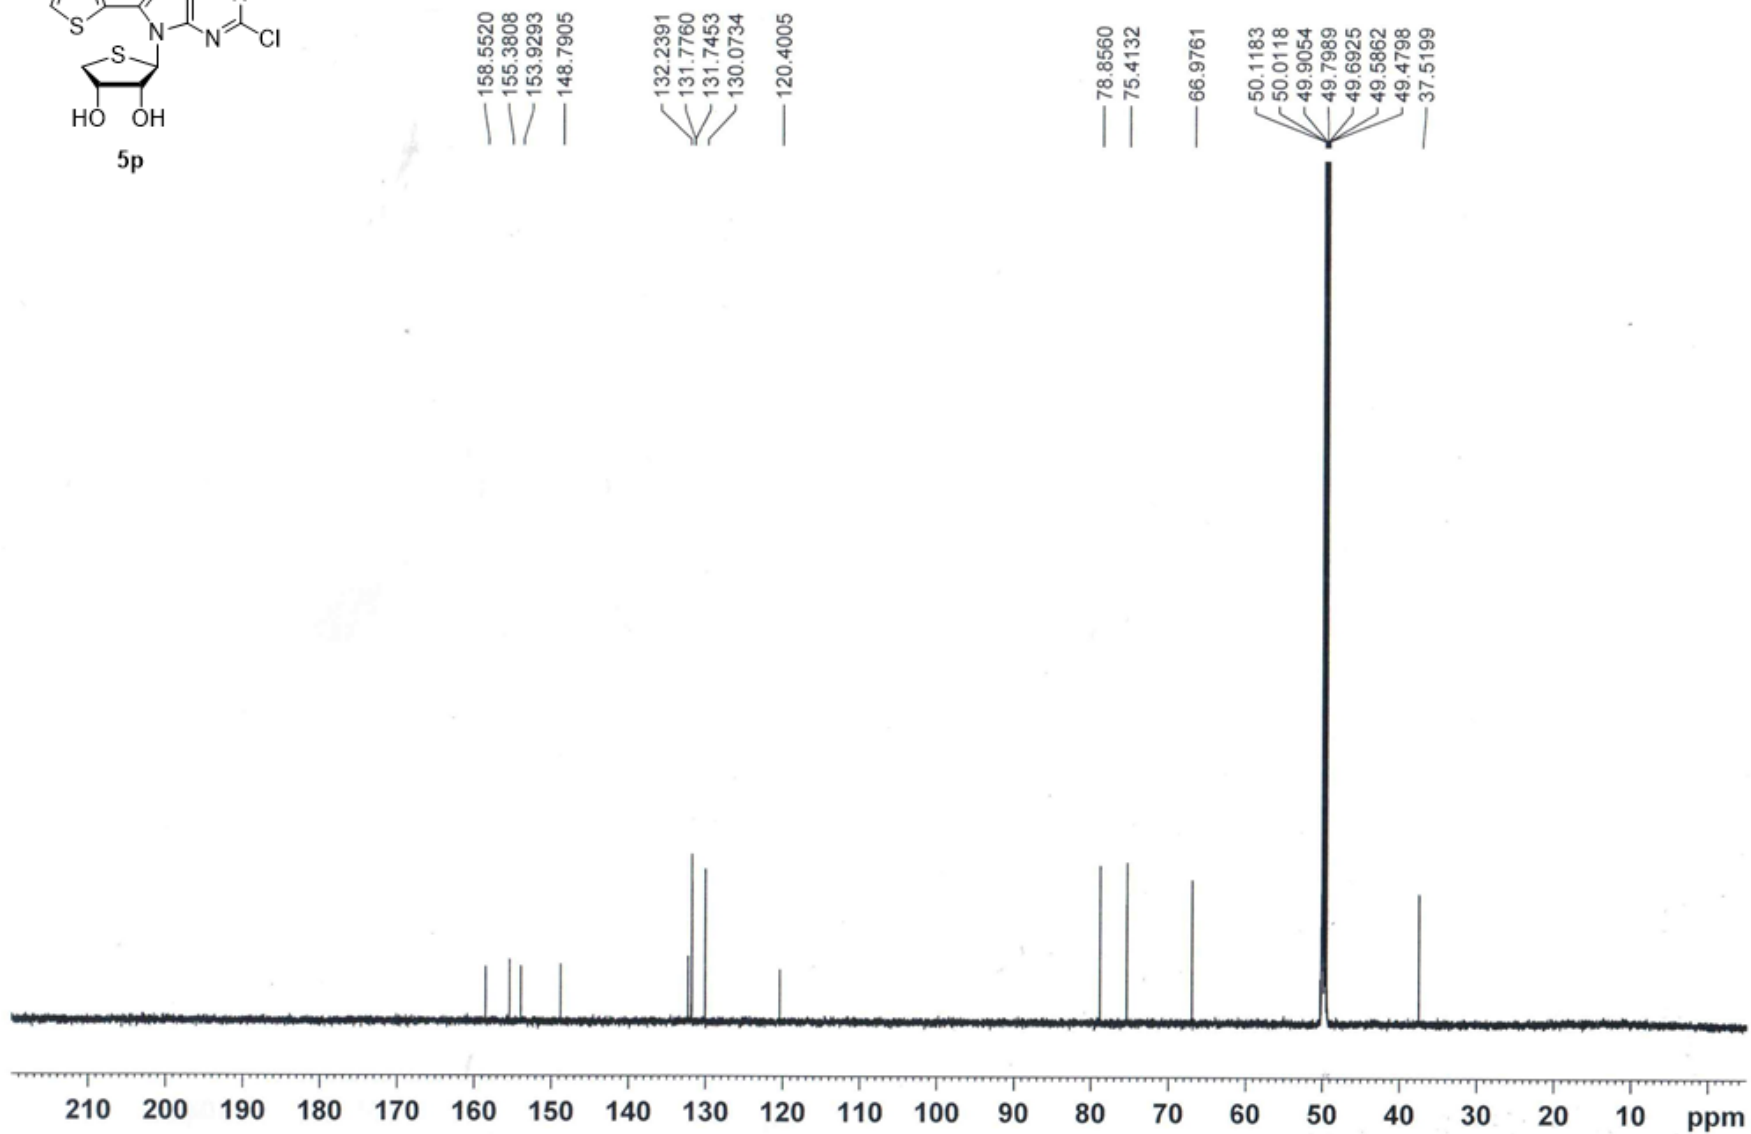

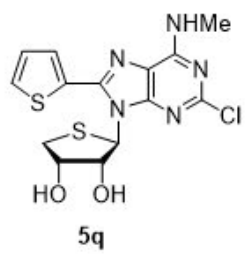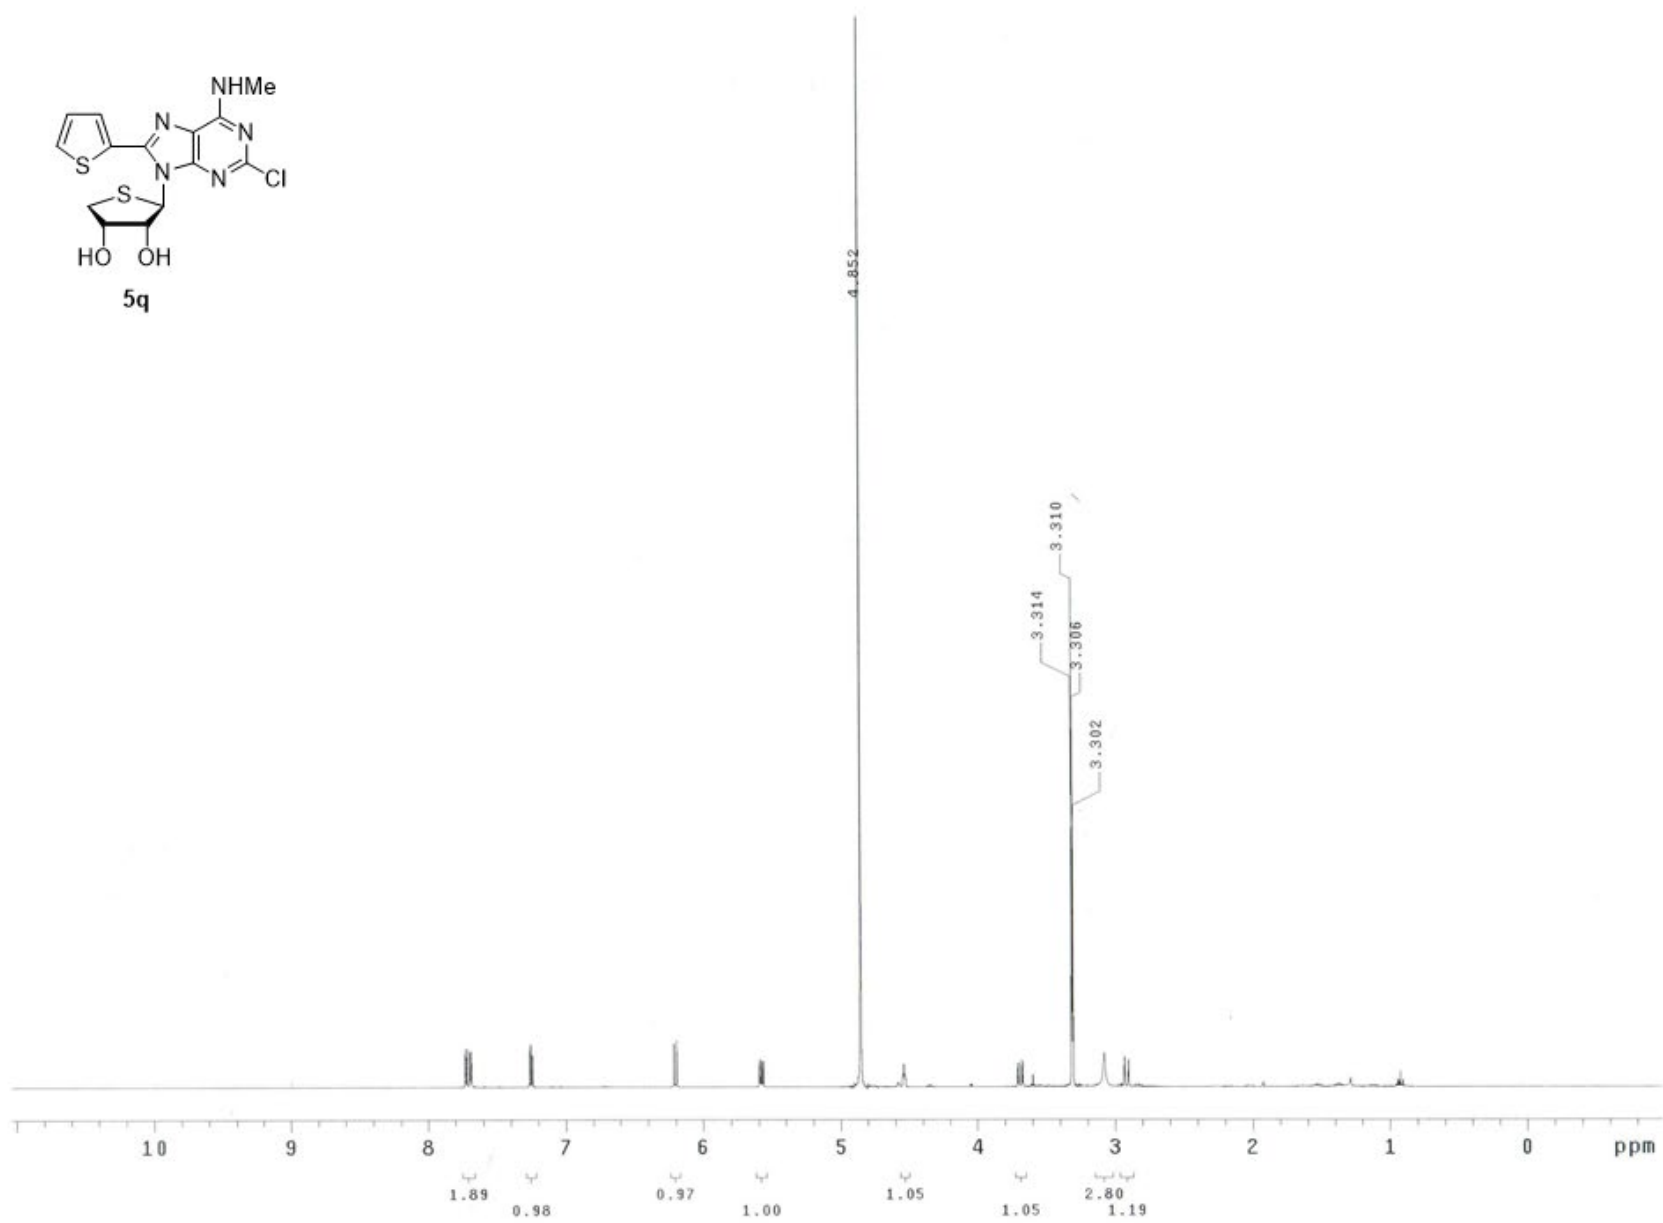

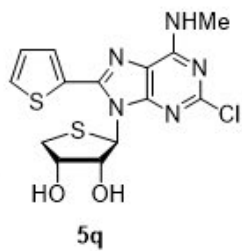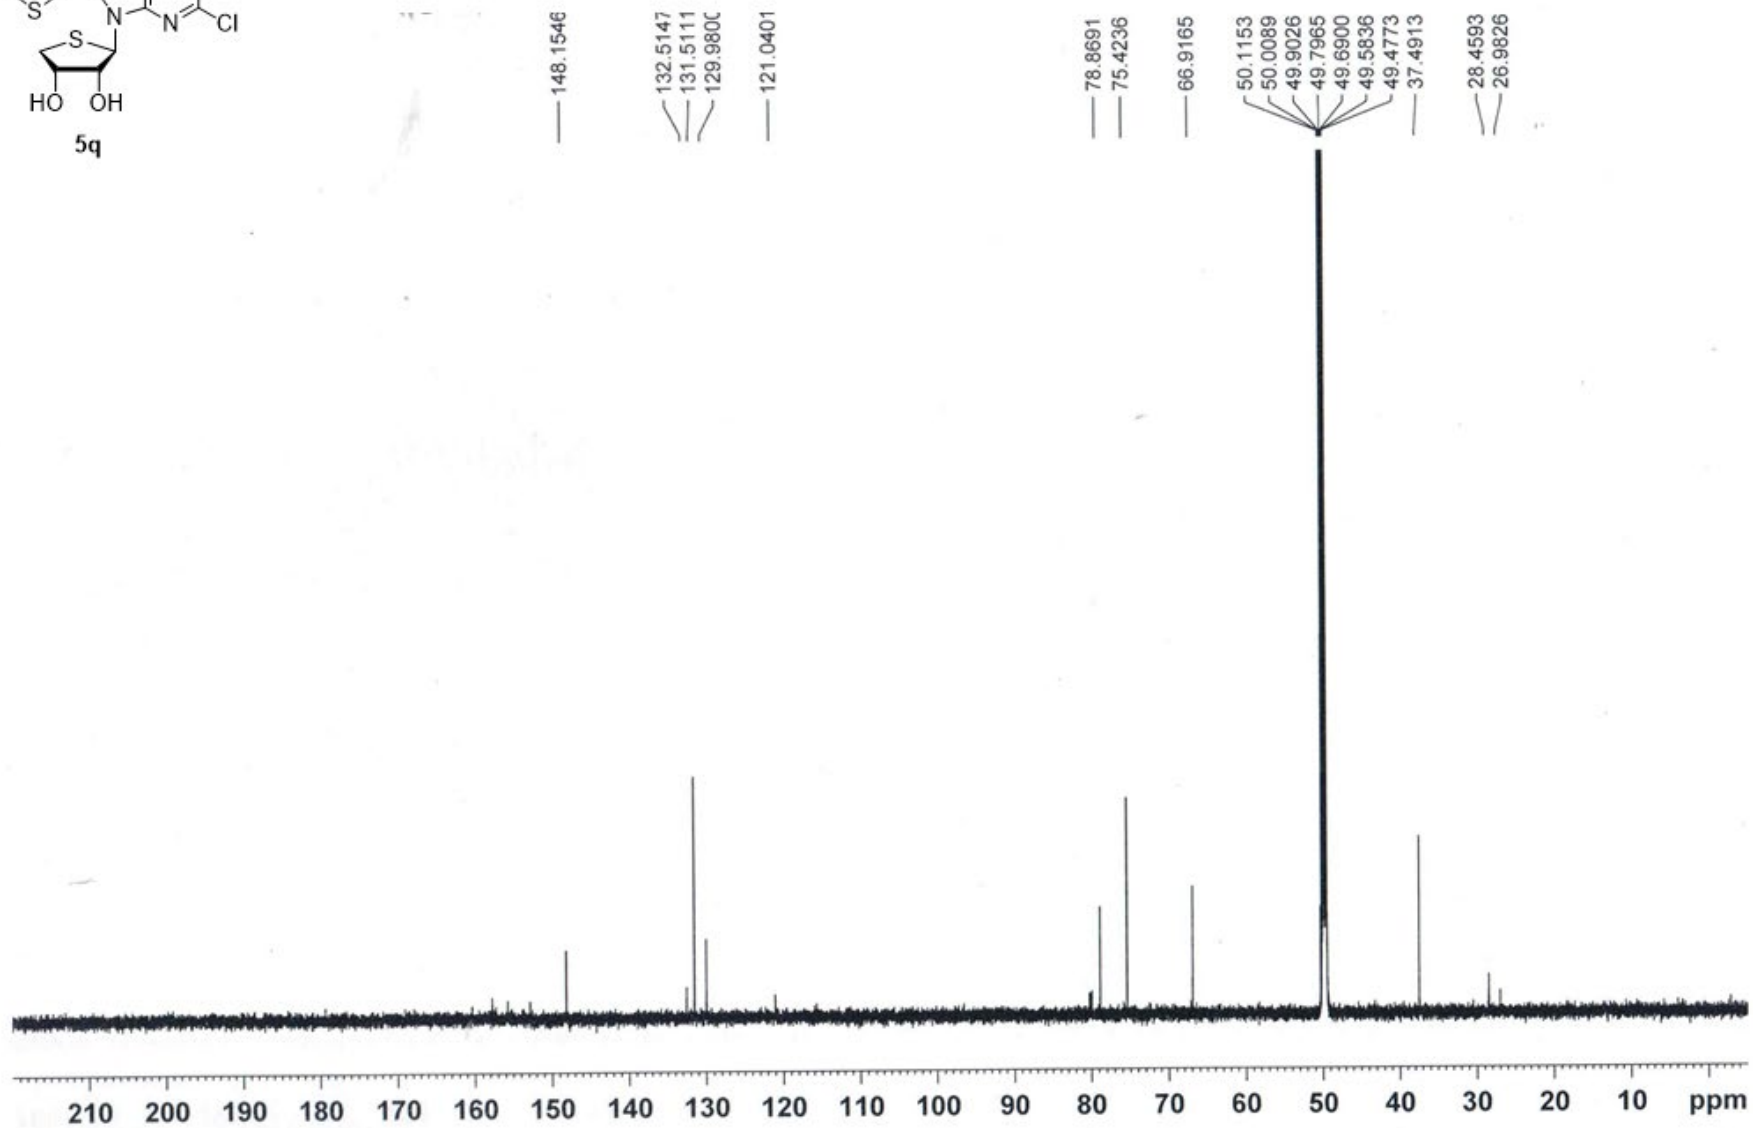

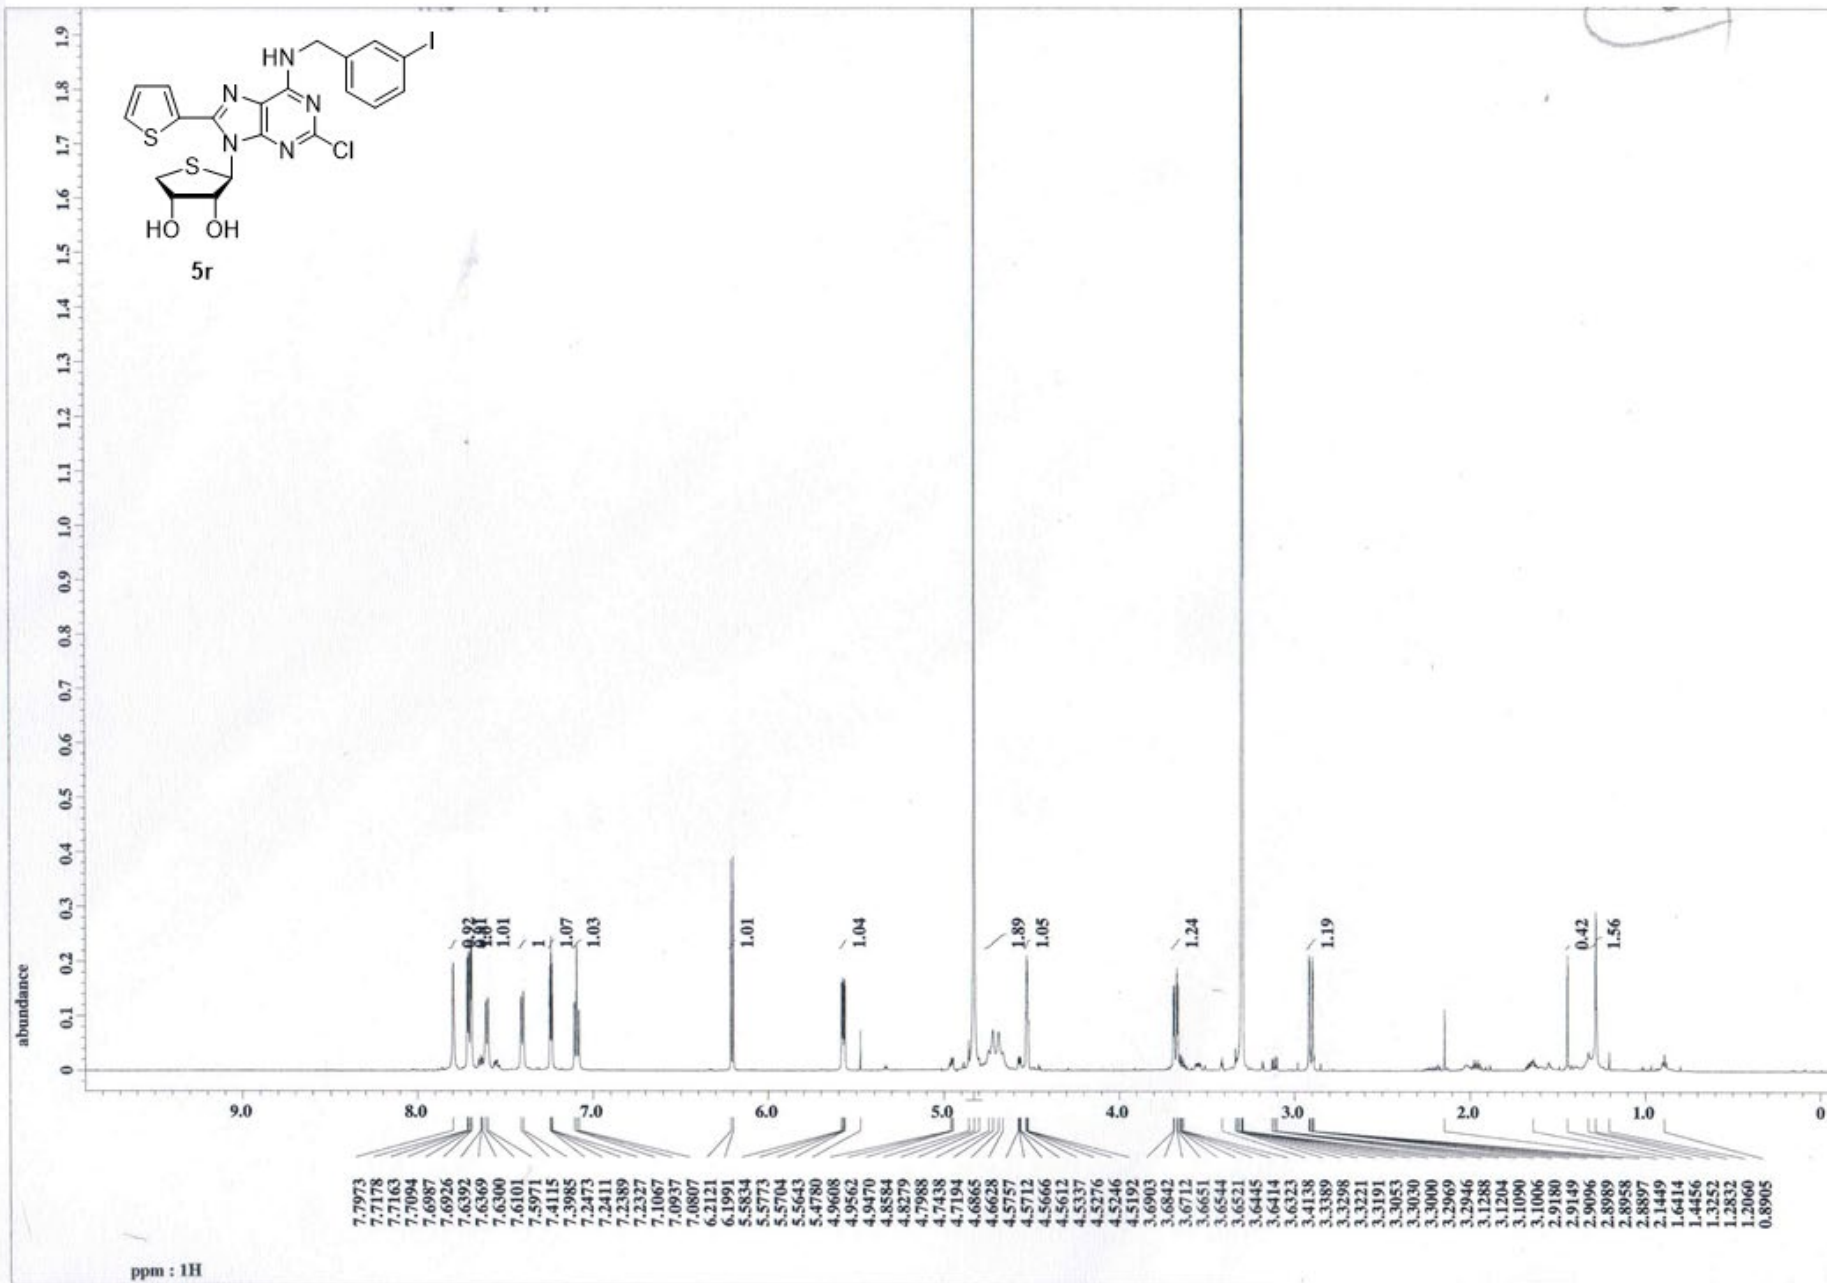



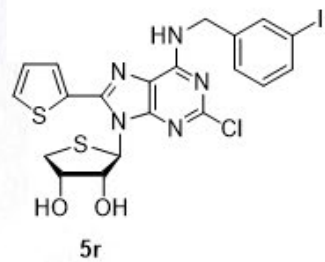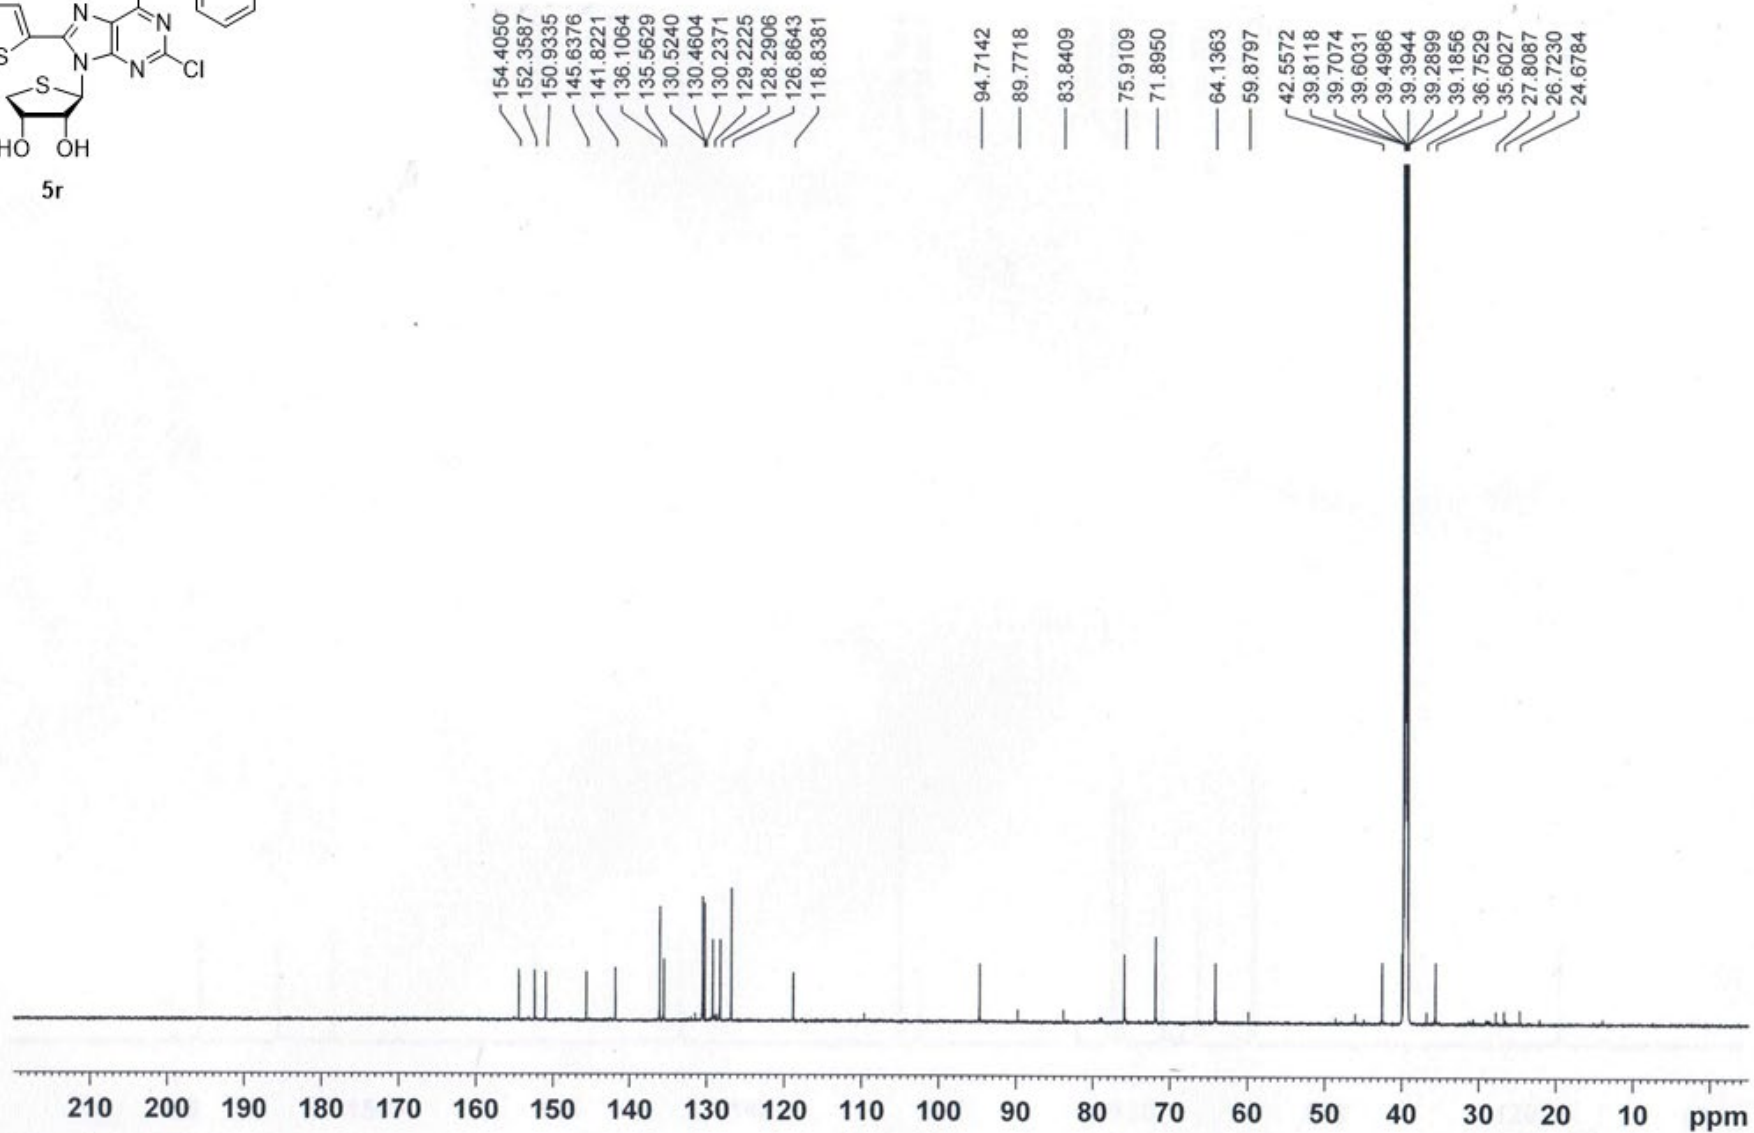

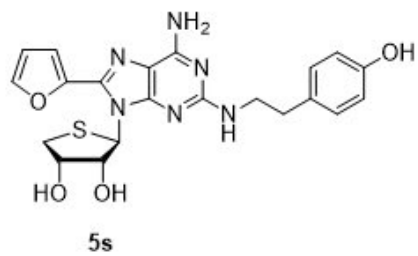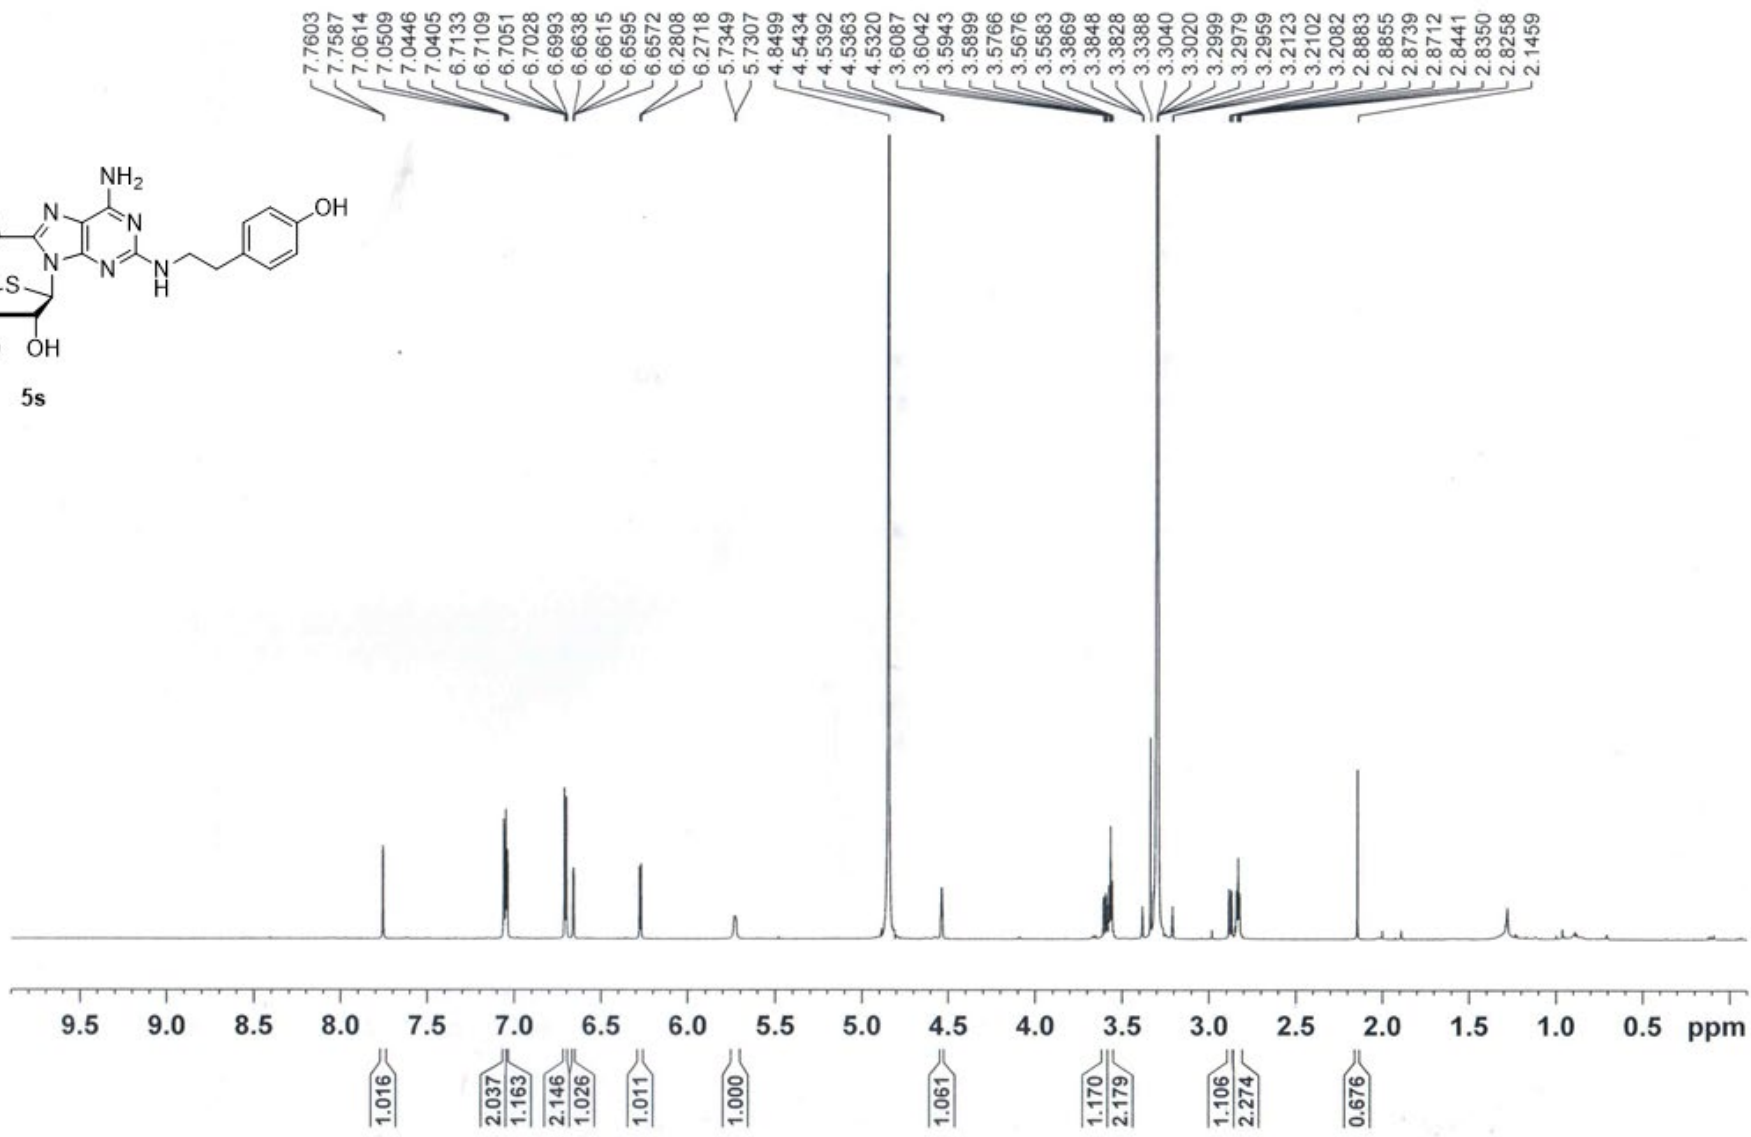

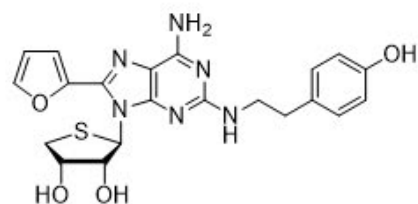

5s

158.7779  
156.0930  
155.4608

144.3447  
144.2984

138.0123

130.0761  
129.3702

115.0541  
111.7671  
111.3414

79.1527  
78.9468  
75.7526  
72.6425

39.8123  
39.7078  
39.6036  
39.4991  
39.3948  
39.2904  
39.1860  
35.7532  
34.5866

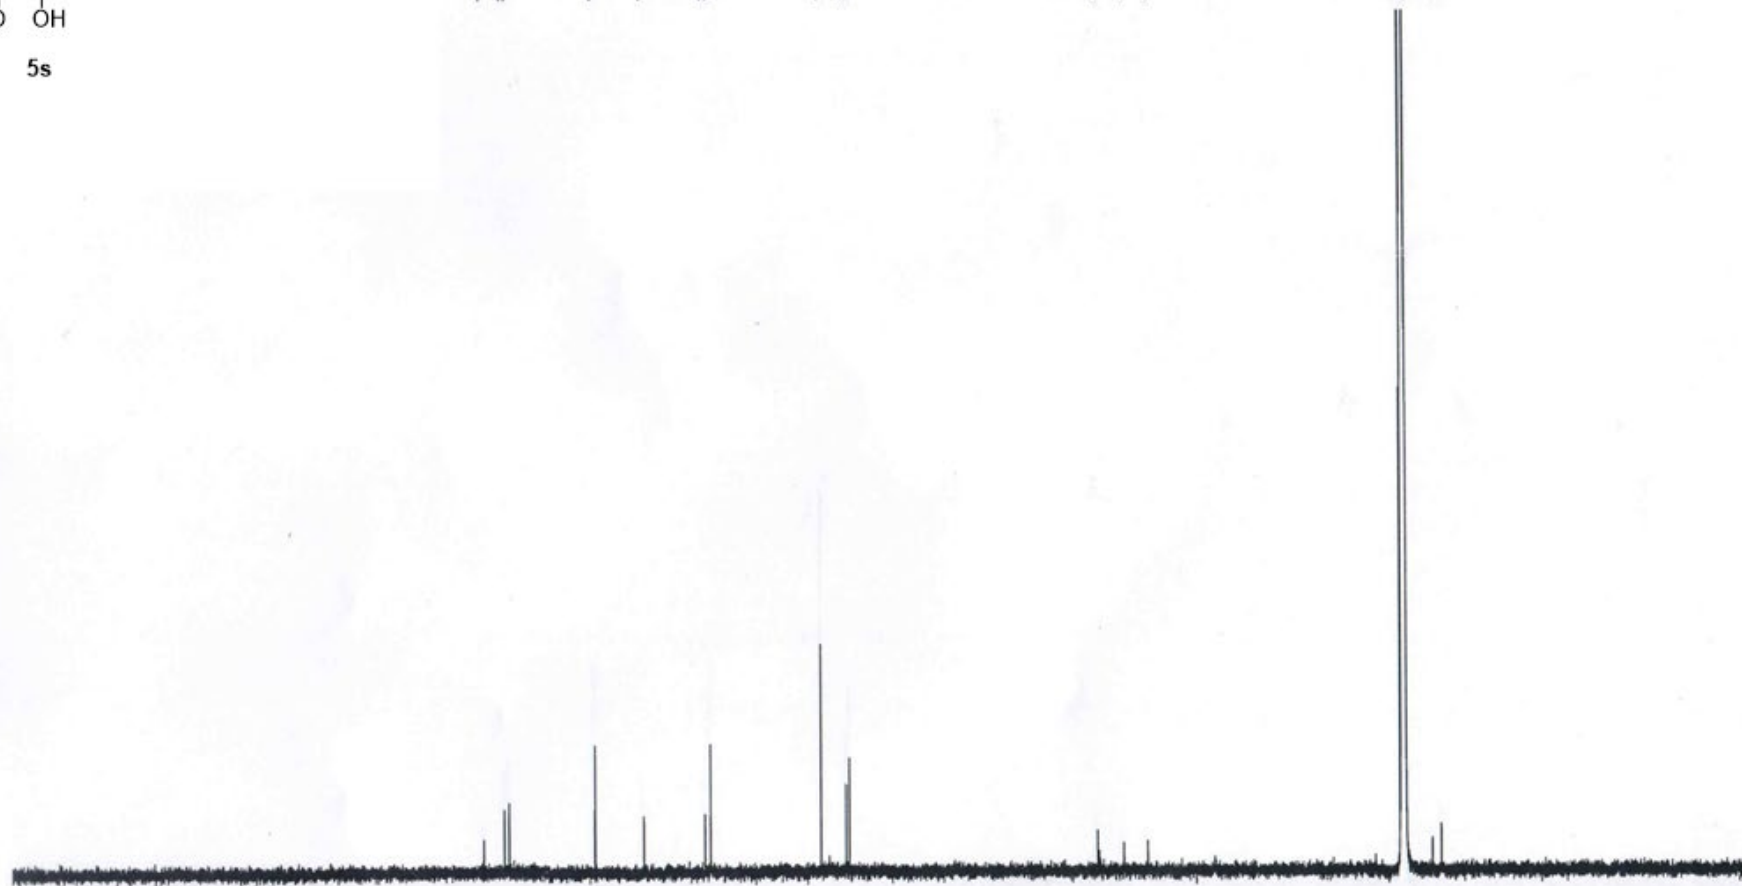

210 200 190 180 170 160 150 140 130 120 110 100 90 80 70 60 50 40 30 20 10 ppm

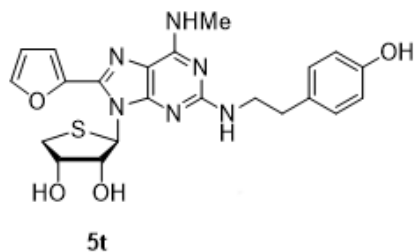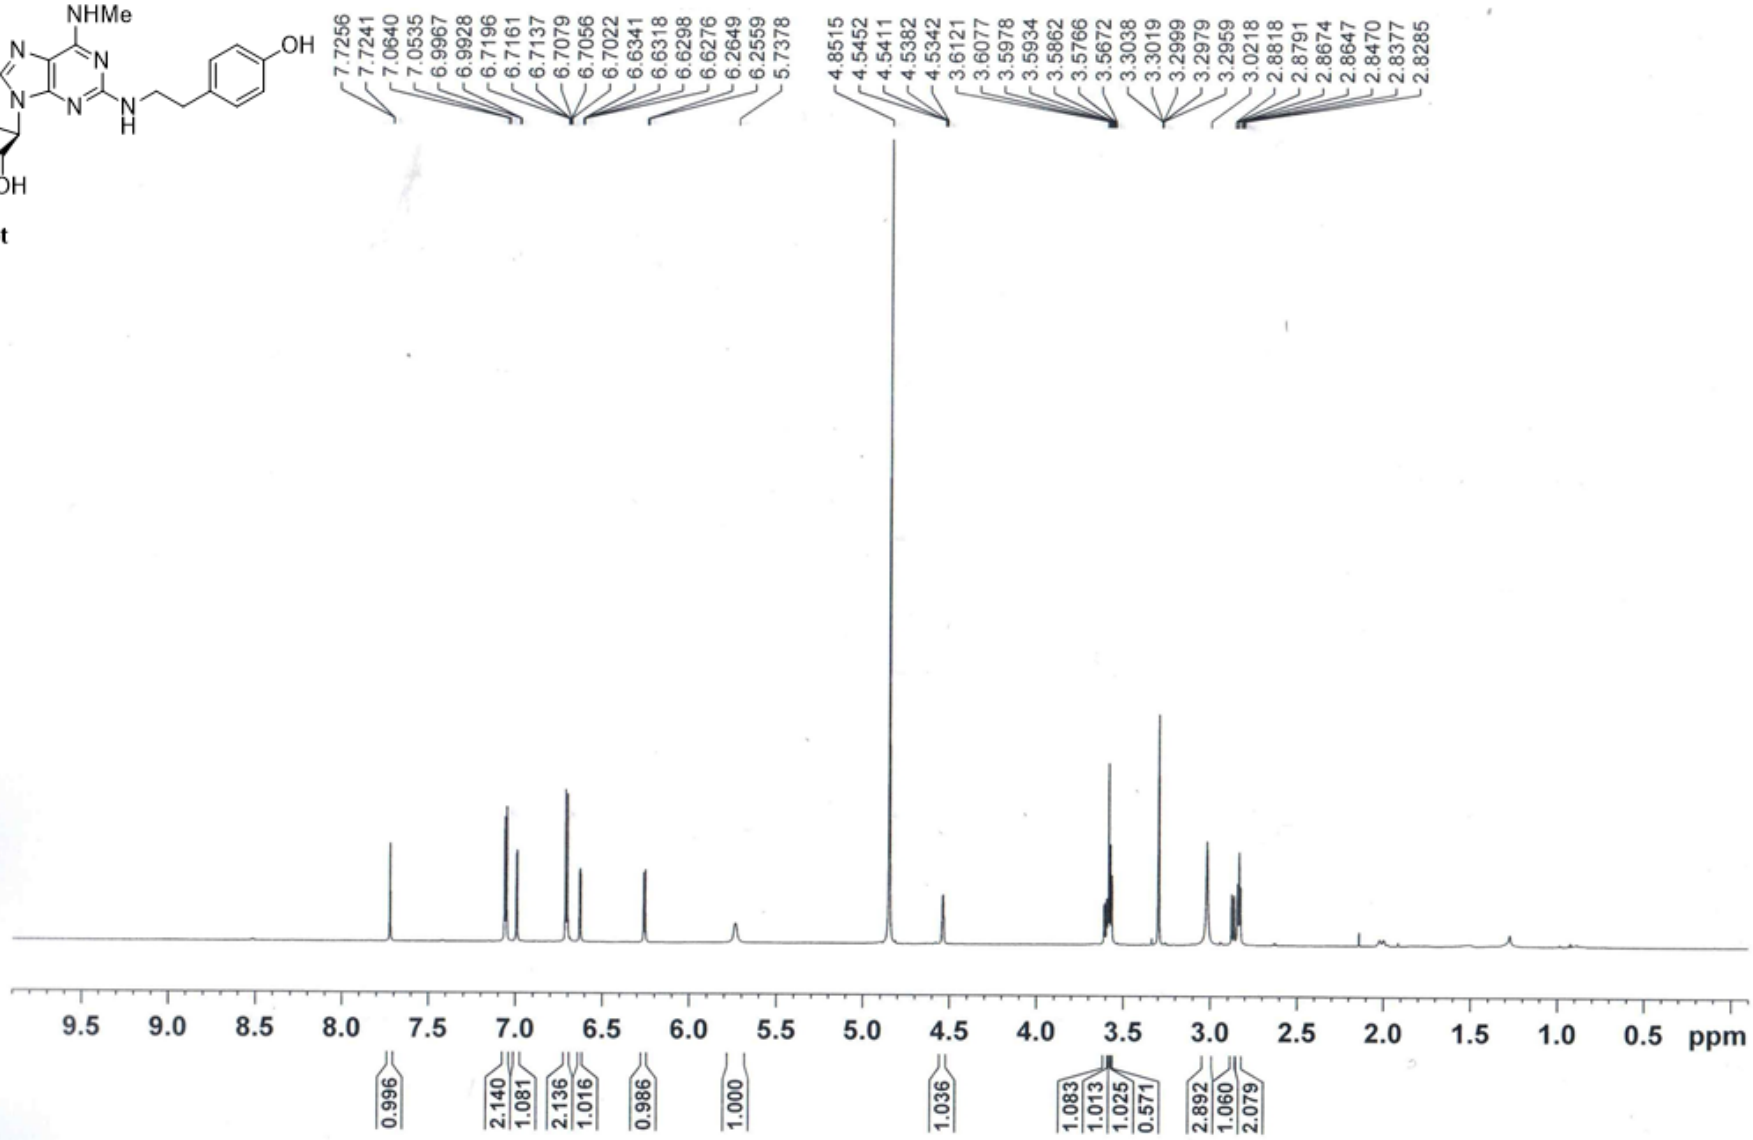

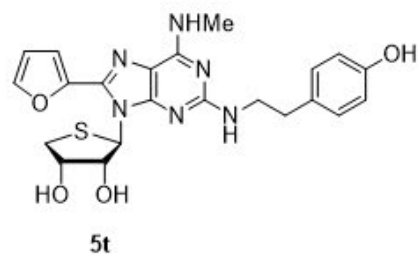

- 158.7593
- 155.4645
- 155.3246
- 155.2552
- 144.4007
- 144.2425
- 137.6672
- 130.0897
- 129.3446
- 115.0838
- 111.7744
- 111.1909
- 75.8287
- 72.6451
- 63.9635
- 62.7699
- 59.7349
- 43.1250
- 39.8094
- 39.7050
- 39.6007
- 39.4963
- 39.3919
- 39.2876
- 39.1831
- 35.7641
- 34.6425
- 26.8084
- 20.7456
- 14.0667

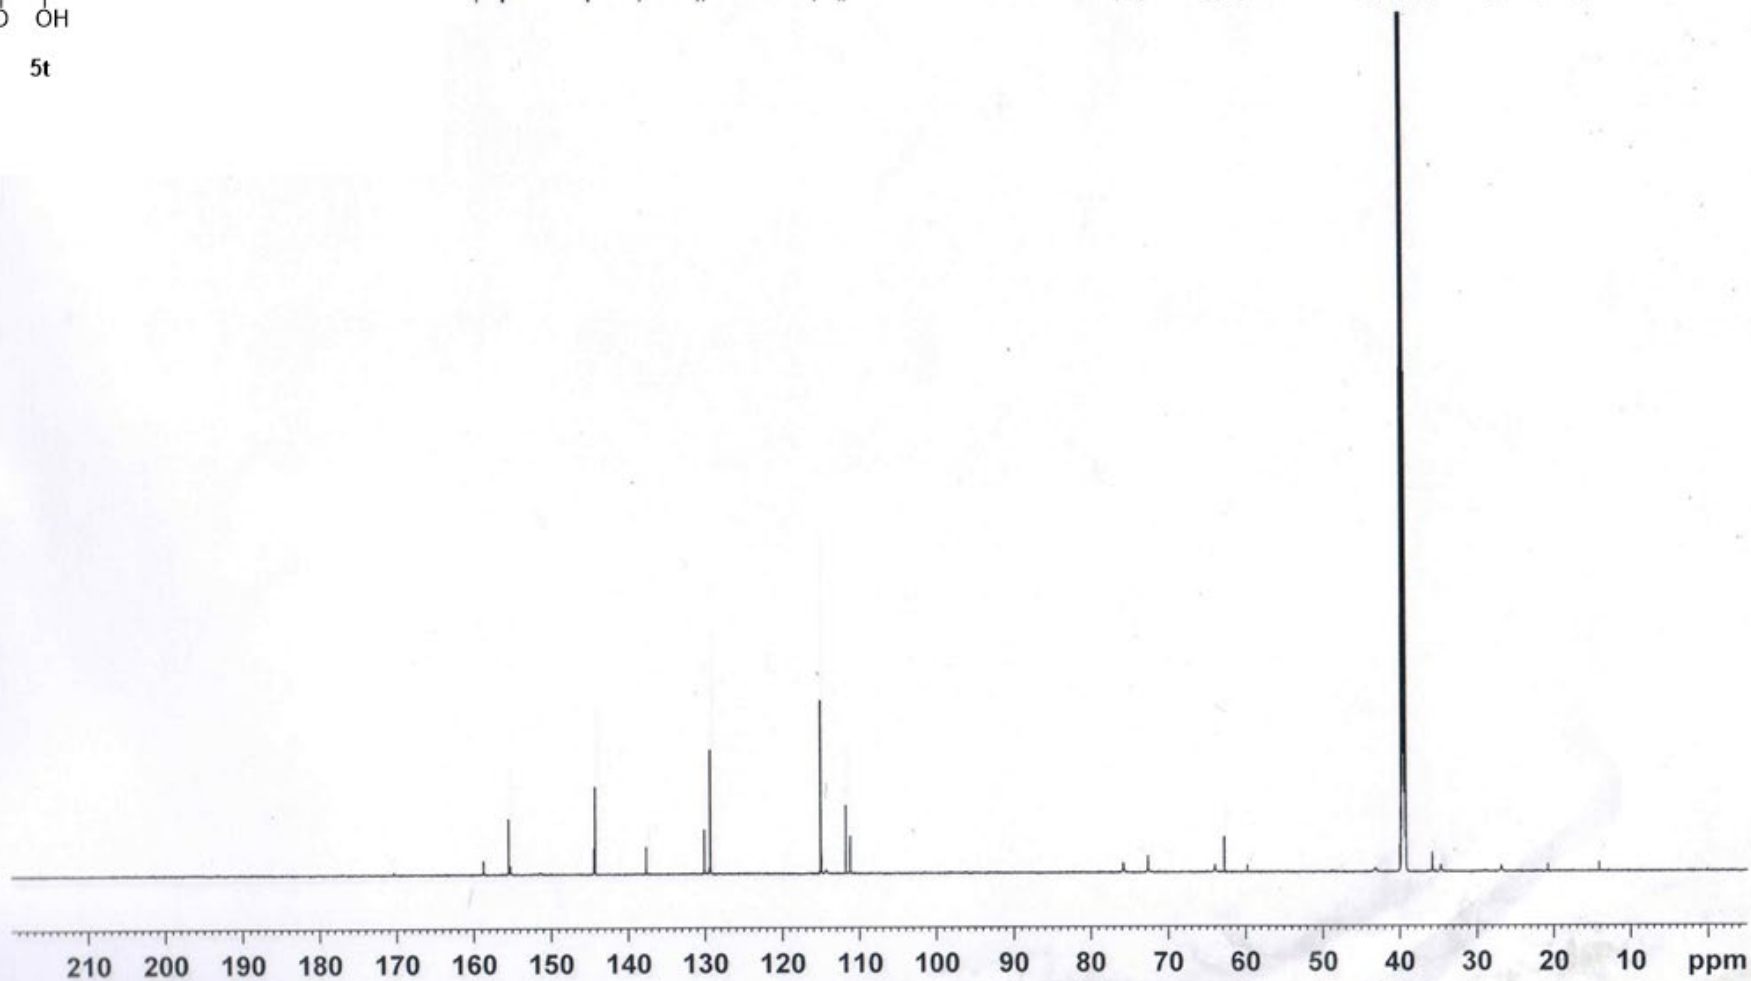

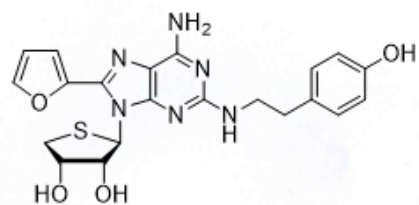

5u

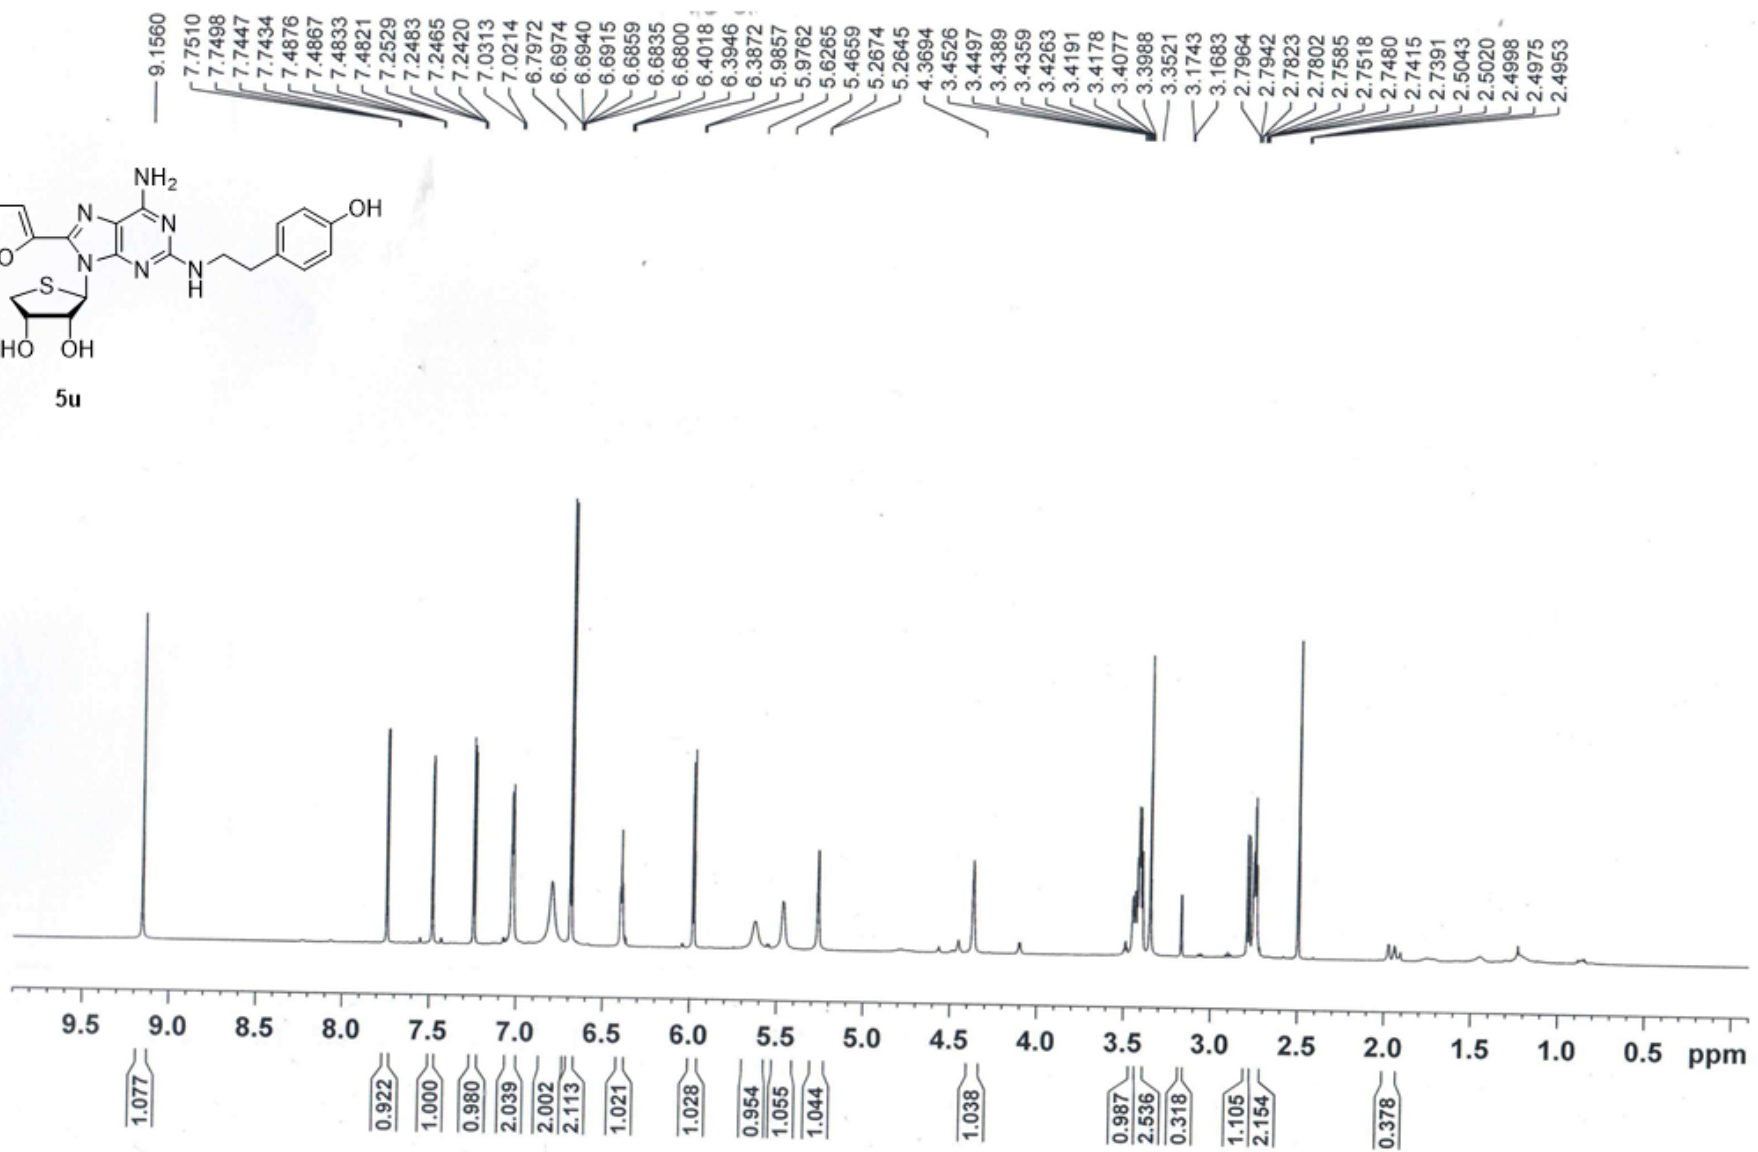

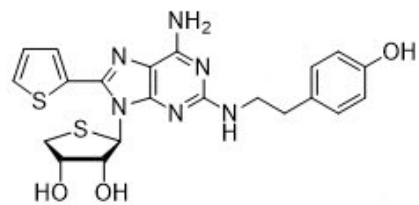

5u

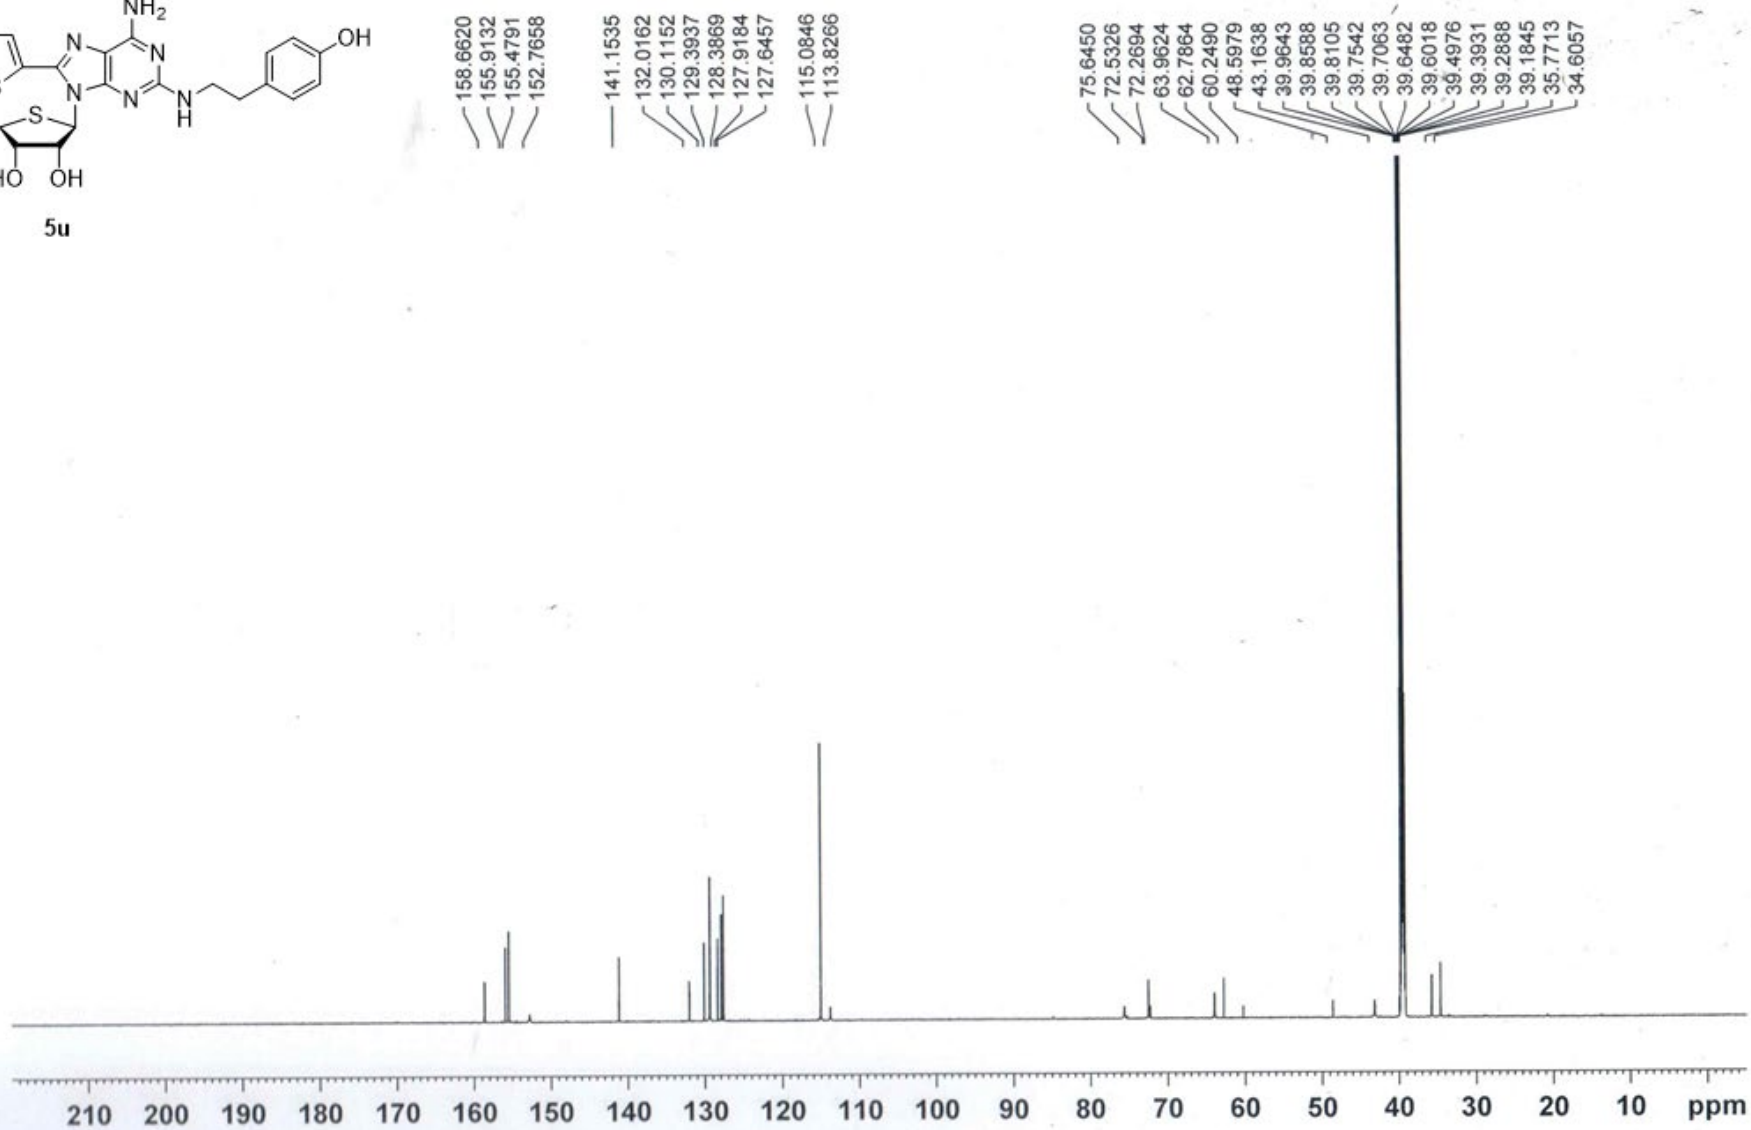

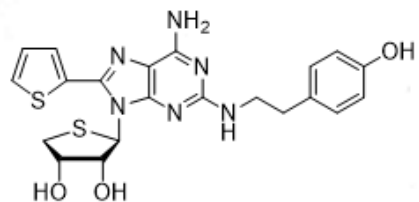

5u

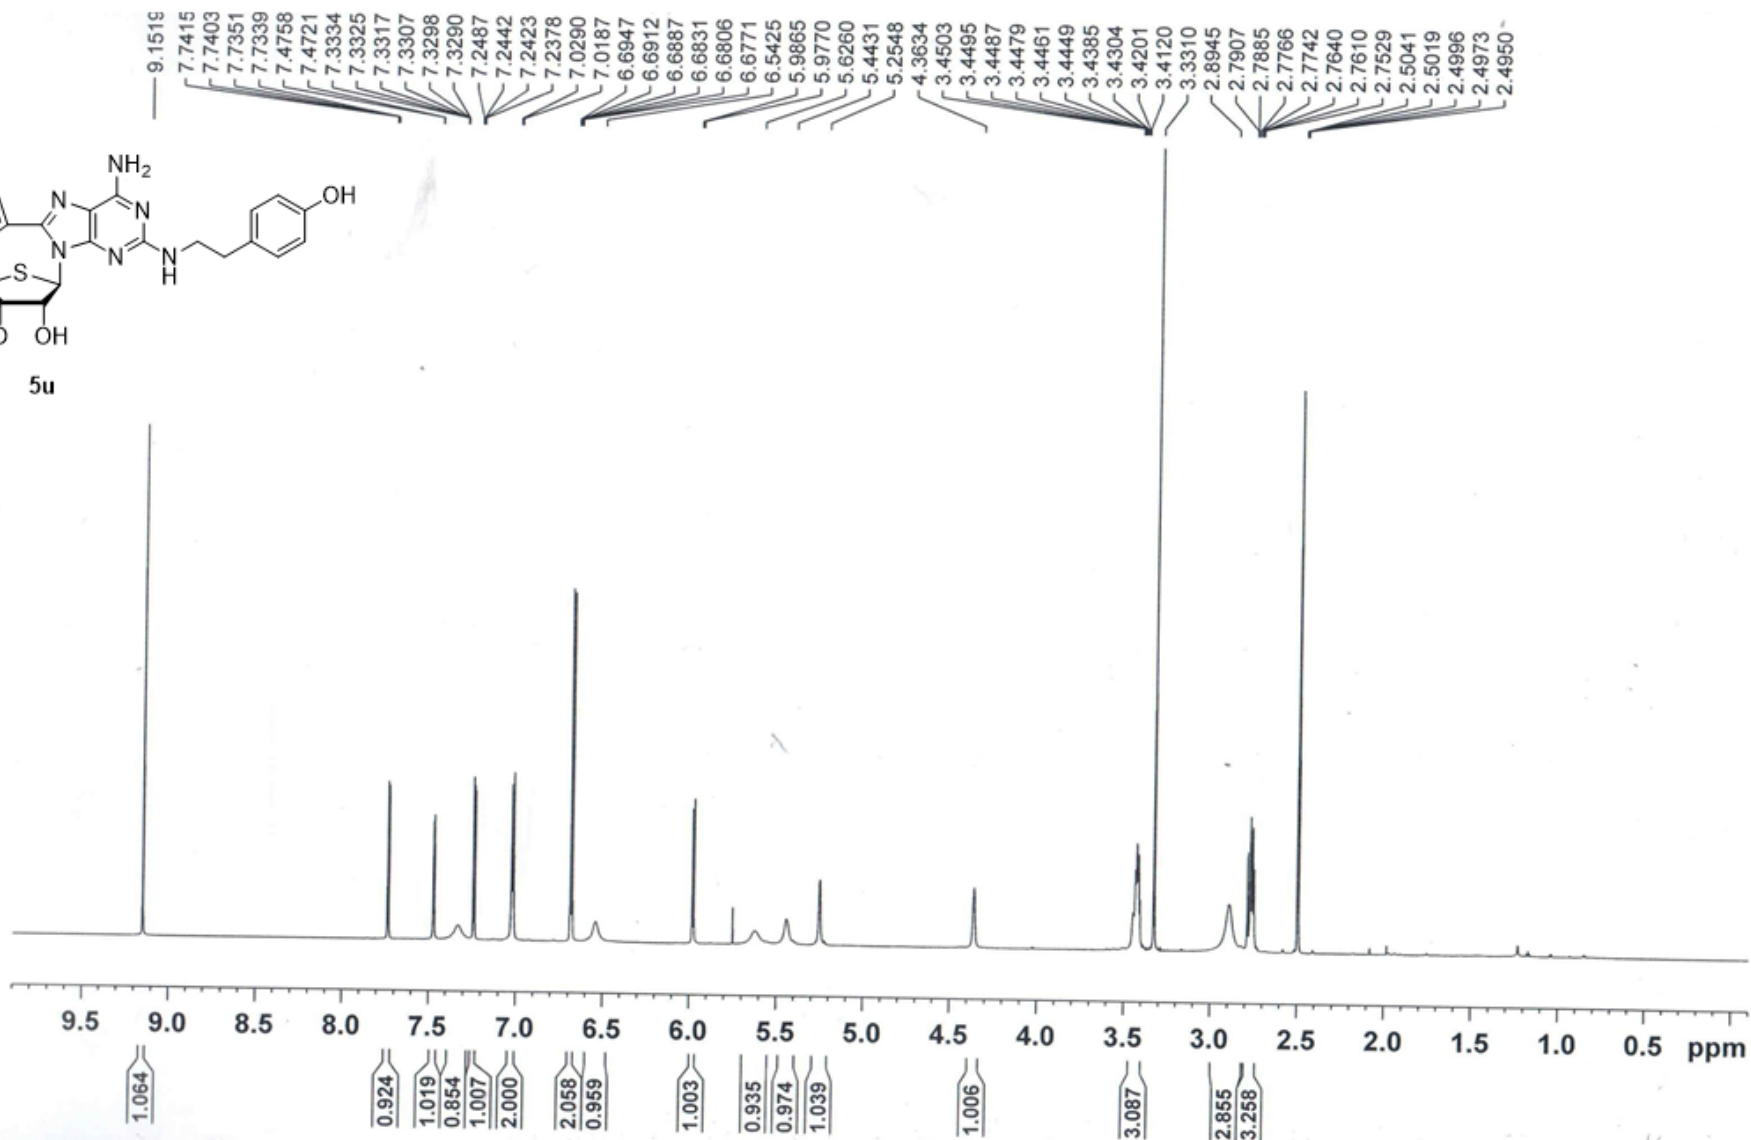



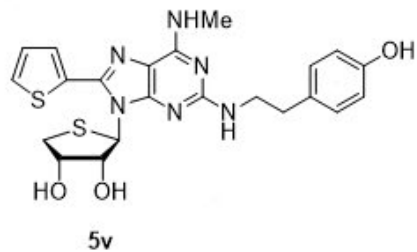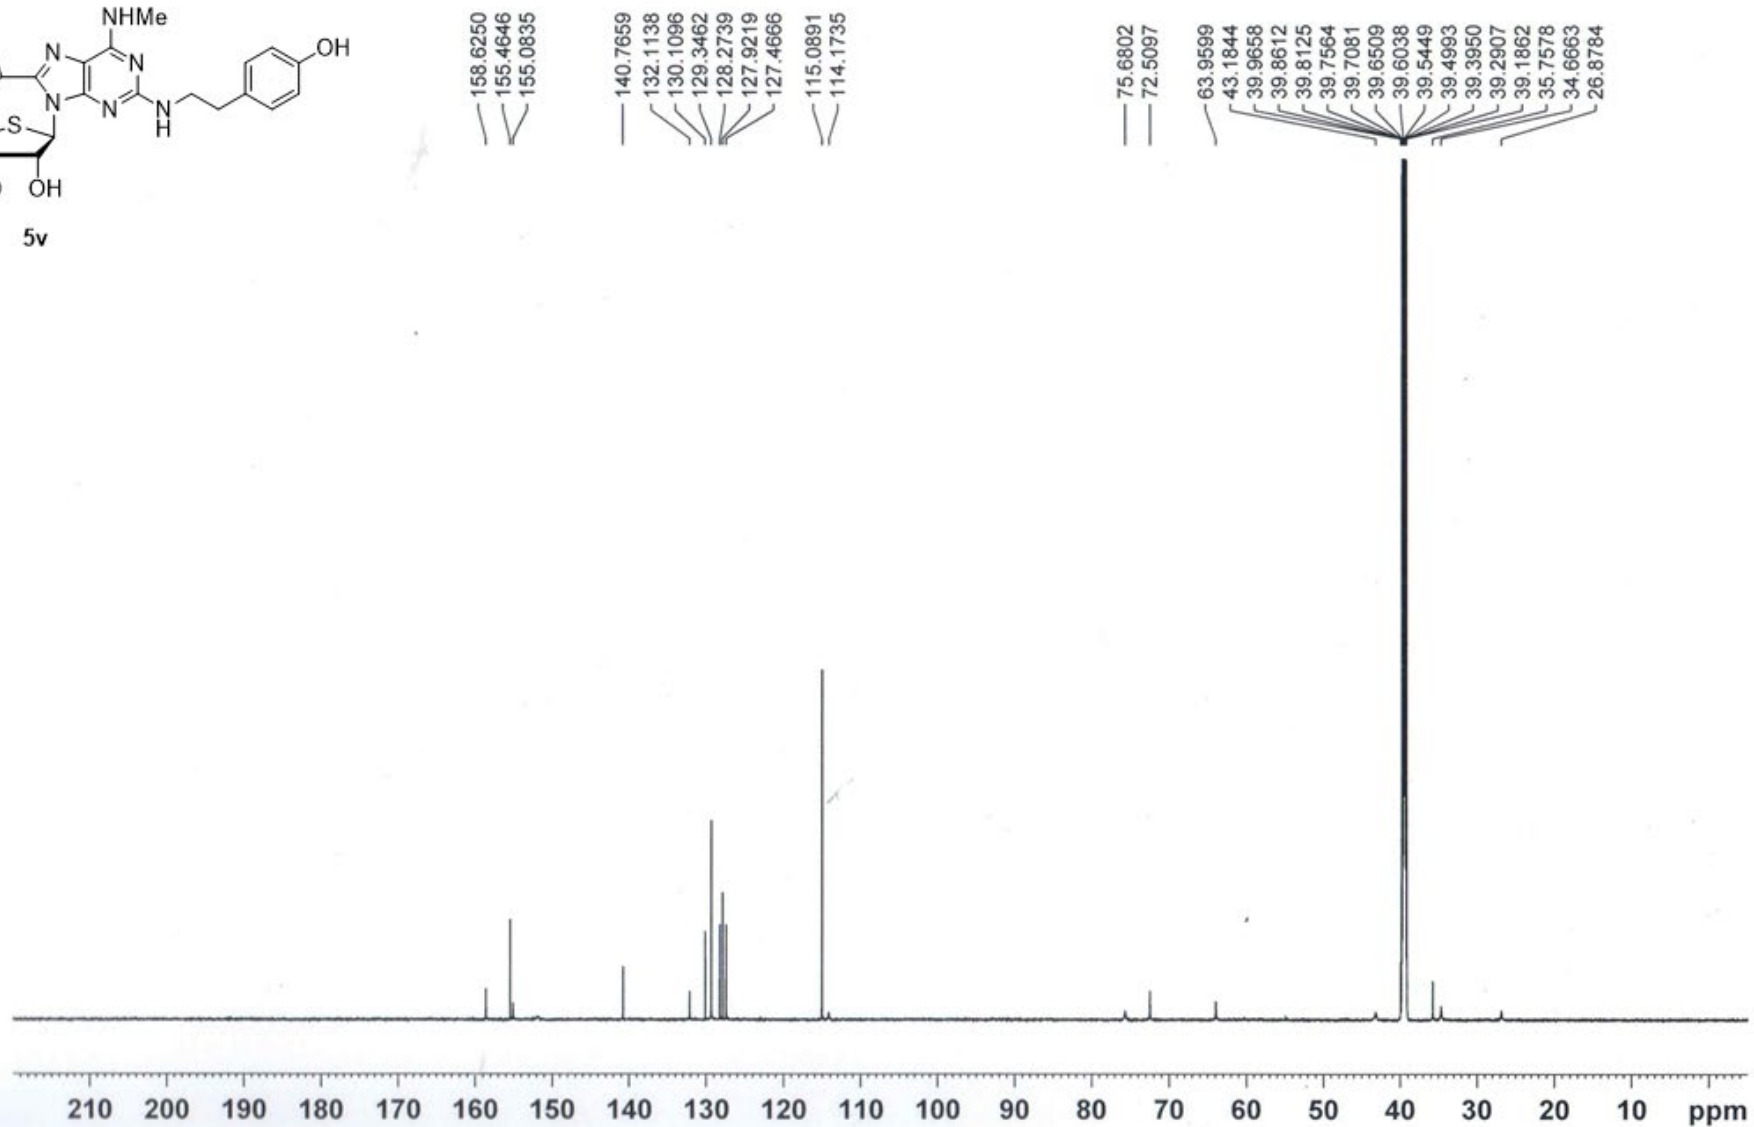

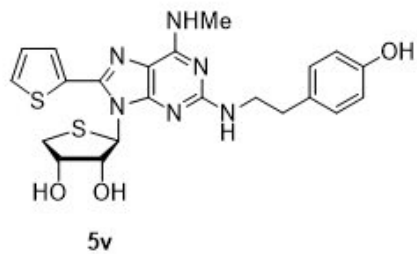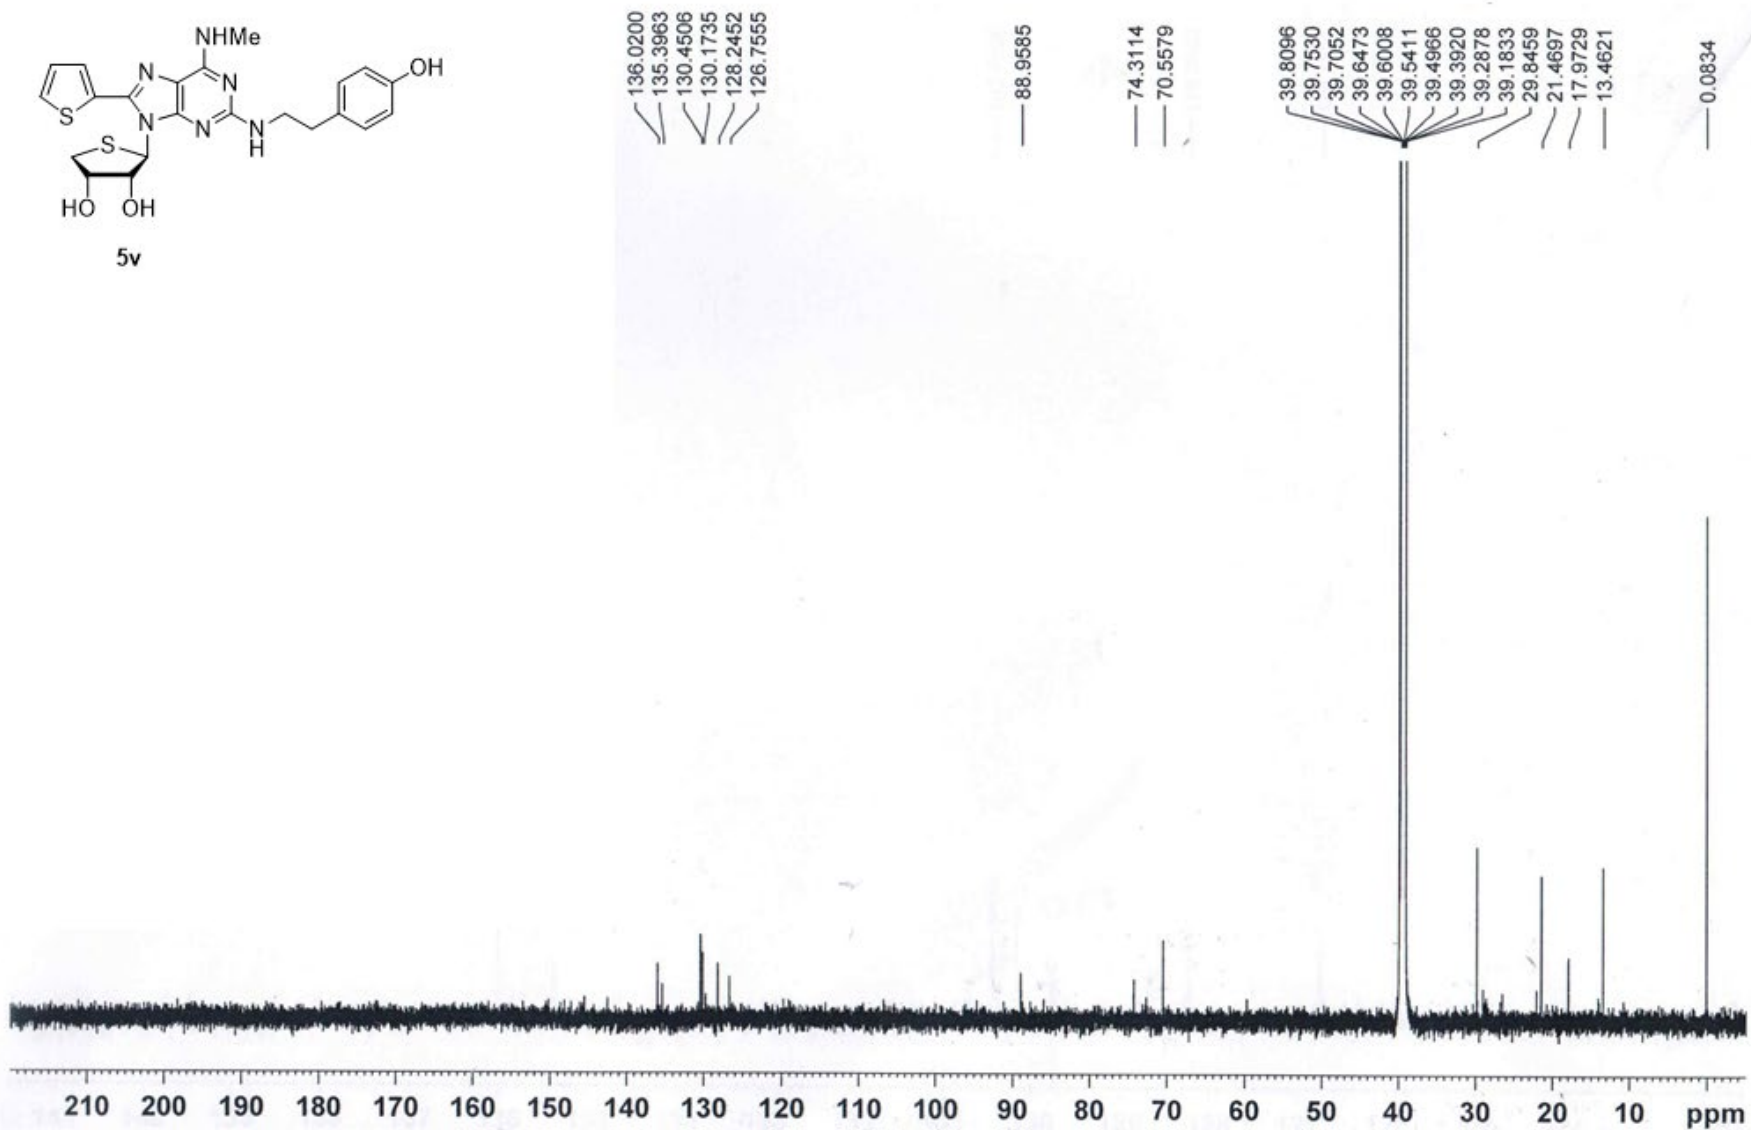

Supplement: NIHMS1969160-supplement-SI_file.pdf [file NIHMS1969160-supplement-SI_file.pdf]
